# Supplementary material for: Integrative computational approaches identify haptoglobin inhibitors to modulate erythrocyte sedimentation rate in trauma-linked inflammatory and haematological malignancies
Source: Front Chem. 2025 Jun 18;13:1611972. doi: 10.3389/fchem.2025.1611972 (PMC12213505; doi:10.3389/fchem.2025.1611972)
Supplement: Supplementary file 1 [file Table1.xlsx]

## Sheet: ProteinDescriptors_PPW
Descriptors	Experiment	AGGRESCAN_Nr_hotspots	AGGRESCAN_a3v_value	Aa_Composition	Aa_Composition_Swissprot	Aa_Flexibility_VTR	All_AggScore	All_Aggrescan_a4v	All_Aggrescan_a4v_pos	All_Aromatic_SASA	All_Atomic_Contact_Energy	All_Dipole_Moment	All_Formal_Charge	All_Greasy_SASA	All_HB_Acceptor_SASA	All_HB_Donor_SASA	All_Hydrophilic_SASA	All_Hydrophobic_Moment	All_Hydrophobic_Patch_Energy	All_Hydrophobic_Patch_Energy_gt15	All_Hydrophobic_Patch_Energy_gt30	All_Hydrophobic_SASA	All_Moment_of_Inertia	All_Negative_Patch_Energy	All_Negative_Patch_Energy_gt30	All_Negative_Patch_Energy_gt50	All_Negative_formal_SASA	All_Negative_partial_SASA	All_Positive_Patch_Energy	All_Positive_Patch_Energy_gt30	All_Positive_Patch_Energy_gt50	All_Positive_formal_SASA	All_Positive_partial_SASA	All_SASA	All_Zeta_Potential	All_Zyggregator_profile_smoothed	All_Zyggregator_profile_smoothed_pos	Alpha_Helix_Chou_Fasman	Alpha_Helix_Deleage_Roux	Alpha_Helix_Levitt	Antiparallel_Beta_Strand	Apparent_Charge_eV	Atomic_contact_energy	Average_Flexibility_BP	Avg_Area_Buried	Polarity_Grantham	Polarity_Zimmerman	Radius_of_gyration	Ratio_Hetero_End_Side
Haptoglobin	0	7	0.00357471	1479.6	1488.49	259.508	120.304	0.4793	47.7253	0.0353053	-477.181	554.217	7.05325e-13	0.00433752	0.0203089	0.0260329	0.450756	397.444	1229.77	758.677	502.119	0.549244	16.7834	3012.52	1628.57	1517.73	0.044531	0.442385	3496.42	2558.31	2372.36	0.0722189	0.557615	12215.7	2.38396e-12	-100.739	18.6748	259.82	260.787	263.52	264.96	2.39052e-13	-477.181	113.48	32012.5	2202.9	3369.21	18.1575	144.21
Descriptors	Avg_Score_Hyd_Patches	Avg_Score_Neg_Patches	Avg_Score_Pos_Patches	Avg_Size_Hyd_Patches	Avg_Size_Neg_Patches	Avg_Size_Pos_Patches	Beta_Sheet_Chou_Fasman	Beta_Sheet_Deleage_Roux	Beta_Sheet_Levitt	Beta_Turn_Chou_Fasman	Beta_Turn_Deleage_Roux	Beta_Turn_Levitt	Bulkiness	Coil_Deleage_Roux	Connectivity	Debye_length	Dipole_X_direction	Dipole_Y_direction	Dipole_Z_direction	Dipole_moment	Disorder_Propensity_DisProt	Disorder_Propensity_FoldUnfold	Disorder_Propensity_TOP_IDP	Drag_coeffient	Electrophoretic_mobility	Exposed_agg_surf_area	Formal_Charge_eV	HPLC_Retention_Ph_2_1	HPLC_Tfa_Retention	Hplc_Hfba_Retention	Hplc_Retention_Ph_7_4	Hydrodynamic_radius	Hydrophobic_X_direction	Hydrophobic_Y_direction	Hydrophobic_Z_direction	Hydrophobicity_Abraham_Leo	Hydrophobicity_Black	Hydrophobicity_Bull_Breese	Hydrophobicity_Chothia	Hydrophobicity_Eisenberg	Hydrophobicity_Fauchere	Hydrophobicity_Guy	Hydrophobicity_Hopp_Woods	Hydrophobicity_Hplc_Parker	Hydrophobicity_Hplc_Ph_3_4_Cowan	Sum_Size_Hyd_Patches	Sum_Size_Neg_Patches	Sum_Size_Pos_Patches	Total_Beta_Strand
Haptoglobin	0.541688	1.21477	1.14535	143.009	81.7271	180.921	264.6	261.625	258.86	252.75	253.147	252.82	3944.16	257.664	1	95.92	0.202586	0.0627356	0.977253	554.086	2.487	5405.04	24.208	5.54584e-11	1.25664e-17	52.986	0	506.2	621.2	546.8	358.5	33.058	0.676861	0.736057	0.00895901	84.2	136.301	-9.17	72.94	11.26	98.64	-2.44	-15.7	400.5	22.15	2288.14	2615.27	3075.65	264.55
Descriptors	Hydrophobicity_Hplc_Ph_7_5_Cowan	Hydrophobicity_Hplc_Wilson	Hydrophobicity_Janin	Hydrophobicity_Kyte_Doolittle	Hydrophobicity_Manavalan	Hydrophobicity_Miyazawa_Jernigan	Hydrophobicity_Rao_Argos	Hydrophobicity_Rf_Mobility	Hydrophobicity_Rose	Hydrophobicity_Roseman	Hydrophobicity_Sweet	Hydrophobicity_Tanford	Hydrophobicity_Welling	Hydrophobicity_Wolfenden	Hydrophobicity_moment_KD	Hydrophobicity_moment_Rosman	Inertia_X_direction	Inertia_Y_direction	Inertia_Z_direction	Ionic_strength	Max_Score_Hyd_Patches	Max_Score_Neg_Patches	Max_Score_Pos_Patches	Max_Size_Hyd_Patches	Max_Size_Neg_Patches	Max_Size_Pos_Patches	Molecular_Weight	Molecular_weight_kDa	Net_Charge_model_based	Net_Charge_propka_based	Nr_Hyd_Patches	Nr_Hyd_Patches_gt250	Nr_Hyd_Patches_gt500	Nr_Neg_Patches	Nr_Neg_Patches_gt250	Nr_Neg_Patches_gt500	Nr_Pos_Patches	Nr_Pos_Patches_gt250	Nr_Pos_Patches_gt500	Nr_of_hydrogen_bonds	Nr_rotatable_bonds	Number_Of_Codons	Parallel_Beta_Strand	Percentage_Accessible_Res	Percentage_Buried_Res	Total_negative_SASA	Total_positive_SASA	Transmembrane_Tendency	Volume_asa_based
Haptoglobin	0.44	428.1	-36.6	-77.6	3328.38	1405.74	225.8	1209.3	187.2	-92.44	-17.37	49.19	-26	-993.08	375.162	202.614	0.902429	0.930039	1.11507	0.001	186.655	415.895	1411.73	379.719	305.517	1212.34	33366	28.8042	2.32343	1.19562	16	3	0	32	2	0	17	3	1	187	753	855	264.74	1491.4	1574.1	543.979	882.206	-128.72	5776.11
Energy Type	Value
Total Energy of the system	-3.52993E+03 kcal/mol
Total Potential Energy	-3.52993E+03 kcal/mol
Total Kinetic Energy	0.00000E+00 kcal/mol
Temperature of the system	0.000 K
Bond Stretch Energy	2.62462E+02 kcal/mol
Angle Bending Energy	1.21983E+03 kcal/mol
Torsion Angle Energy	8.61749E+02 kcal/mol
Restraining Energy for Torsions	0.00000E+00 kcal/mol
1,4 Lennard Jones Energy	2.49605E+03 kcal/mol
1,4 Electrostatic Energy	1.18138E+03 kcal/mol
Lennard Jones Energy	-5.81707E+03 kcal/mol
Electrostatic Energy	-3.76839E+03 kcal/mol
H-bond Energy	0.00000E+00 kcal/mol
[truncated: 7 more columns]

## Sheet: Docking
PDB ID	DrugBank ID	State Penalty	Docking Score	XP GScore	XP HBond		LEU		ALA	4		ALA	4			10	LYS
4X0L	DB03997	2.1108	-7.96205	-10.0728	-1.50797		LEU		ALA	3						8	LEU
4X0L	DB04304	0	-7.7421	-7.7421	-3.73086		LEU		ALA	2						7	ASP
4X0L	DB07197	0.0007	-6.923	-6.9237	-2		THR		ALA	1						7	THR
4X0L	DB02438	0	-6.16148	-6.16148	-2.81041		THR		ARG	2		ARG	2			5	ASN
4X0L	DB02446	0	-5.57589	-5.57589	-1.91377		THR		ARG	1						5	TYR
PDB ID	DrugBank ID	MMGBSA dG Bind	Complex Energy	ligand efficiency sa	ligand efficiency ln		THR		ASN	5		ASN	5			4	ALA
4X0L	DB03997	-26.2338	-10371.7	-1.37069	-2.18794		THR		ASN	4						4	GLY
4X0L	DB04304	-19.0886	-10257	-1.40033	-2.17173		THR		ASN	3						3	SER
4X0L	DB07197	-4.11861	-10307.7	-0.909525	-1.7117		THR		ASN	2						2	ARG
4X0L	DB02438	-10.9673	-10230.2	-1.11444	-1.72835		LYS		ASN	1						2	PHE
4X0L	DB02446	-1.00442	-10300.3	-1.12733	-1.64098		LYS		ASP	7		ASP	7
							LYS		ASP	6
							LYS		ASP	5
							LYS		ASP	4
							ASN		ASP	3
							ASN		ASP	2
							ASN		ASP	1
							ASN		GLY	4		GLY	4
							ASN		GLY	3
							LEU		GLY	2
							LEU		GLY	1
							LEU		LEU	8		LEU	8
							LEU		LEU	7
							LEU		LEU	6
							ASP		LEU	5
							ASP		LEU	4
							ARG		LEU	3
							ARG		LEU	2
							PHE		LEU	1
							PHE		LYS	10		LYS	10
							TYR		LYS	9
							TYR		LYS	8
							TYR		LYS	7
							TYR		LYS	6
							TYR		LYS	5
							GLY		LYS	4
							GLY		LYS	3
							GLY		LYS	2
							GLY		LYS	1
							ALA		PHE	2		PHE	2
							ALA		PHE	1
							ALA		SER	3		SER	3
							ALA		SER	2
							SER		SER	1
							SER		THR	7		THR	7
							SER		THR	6
							ASP		THR	5
							ASP		THR	4
							ASP		THR	3
							ASP		THR	2
							ASP		THR	1
							LYS		TYR	5		TYR	5
							LYS		TYR	4
							LYS		TYR	3
							LYS		TYR	2
							LYS		TYR	1

## Sheet: DFT
Title	DB03997	DB04304	DB07197	DB02438	DB02446
Spin multiplicity	1	1	1	1	1
Task	Optimization	Optimization	Optimization	Optimization	Optimization
QM Method	DFT(b3lyp-d3)/SOLV	DFT(b3lyp-d3)/SOLV	DFT(b3lyp-d3)/SOLV	DFT(b3lyp-d3)/SOLV	DFT(b3lyp-d3)/SOLV
QM Basis	6-31g**	6-31g**	6-31g**	6-31g**	6-31g**
Number of canonical orbitals	274	250	373	265	215
Geometry convergence category		1	2	4	4
Gas Phase Energy	-1042.5	-761.927	-3923.05	-726.512	-606.959
Solution Phase Energy	-1042.56	-762.035	-3923.36	-726.542	-606.986
Final Energy	-1042.56	-762.035	-3923.36	-726.542	-606.986
Solvation Energy (kcal/mol)	-37.5523	-67.6358	-198.366	-18.7463	-17.0032
HOMO	-0.231712	-0.253001	-0.214044	-0.260367	-0.245902
LUMO	0.0222342	0.0323761	-0.0517675	-0.0403483	0.00210419
Lowest Frequency (cm-1)	-102.191	105.09	-1396.09	57.1169	71.6033
Highest Frequency (cm-1)	3681.2	3731.21	3701.97	3707.64	3563.94
2nd Lowest Frequency (cm-1)	-25.0521	126.126	78.2314	66.7942	101.722
Num Negative Frequencies	2	0	1	0	0
Zero Point Energy (kcal/mol)	130.316	119.583	115.631	140.662	106.607
Entropy (cal/mol/K) 298.15K 1.00E+00atm	110.011	107.486	126.439	115.853	101.353
Enthalpy (kcal/mol) 298.15K 1.00E+00atm	8.31604	8.35299	10.5687	9.46976	7.46841
Free Energy (kcal/mol) 298.15K 1.00E+00atm	-24.4837	-23.6939	-27.1291	-25.0719	-22.75
Internal Energy (kcal/mol) 298.15K 1.00E+00atm	7.72355	7.7605	9.97623	8.87727	6.87592
Heat Capacity (cal/mol/K) 298.15K 1.00E+00atm	47.7648	48.2789	62.9527	52.7999	41.2883
ln(Q) (kcal/mol) 298.15K 1.00E+00atm	41.3237	39.9906	45.7886	42.3165	38.3976
Total Internal Energy (au) 298.15K 1.00E+00atm	-1042.34	-761.832	-3923.16	-726.303	-606.805
Total Enthalpy (au) 298.15K 1.00E+00atm	-1042.34	-761.831	-3923.16	-726.302	-606.804
Total Free Energy (au) 298.15K 1.00E+00atm	-1042.39	-761.882	-3923.22	-726.357	-606.852
ESP min, kcal/mol	-89.4029	-144.618	-238.724	-40.4736	-63.2776
ESP max, kcal/mol	99.9468	4.32157	13.1746	62.0339	69.76
ESP mean, kcal/mol	2.01313	-81.9582	-135.332	2.23004	1.32926
ESP pos mean, kcal/mol	38.7117	2.08022	6.58485	16.7212	23.8805
ESP neg mean, kcal/mol	-47.1398	-82.3471	-136.422	-19.1234	-27.8429
ESP pos variance, (kcal/mol)**2	655.258	1.53632	13.964	120.212	209.117
ESP neg variance, (kcal/mol)**2	777.682	781.746	3265.66	125.156	347.316
ESP total variance, (kcal/mol)**2	1432.94	783.283	3279.62	245.367	556.433
ESP balance	0.248175	0.00195753	0.00423967	0.249898	0.234579
ESP local polarity, kcal/mol	42.0488	22.6831	50.9612	17.3251	25.4629
ALIE min, kcal/mol	196.846	213.39	199.403	230.558	206.832
ALIE max, kcal/mol	382.572	343.437	372.977	351.463	373.507
ALIE mean, kcal/mol	271.917	263.756	246.331	277.62	280.739
ALIE pos mean, kcal/mol	271.917	263.756	246.331	277.62	280.739
ALIE neg mean, kcal/mol	0	0	0	0	0
ALIE pos variance, (kcal/mol)**2	1852.99	705.818	860.135	592.749	742.625
ALIE neg variance, (kcal/mol)**2	0	0	0	0	0
ALIE total variance, (kcal/mol)**2	1852.99	705.818	860.135	592.749	742.625
ALIE balance	0	0	0	0	0
Avg Abs Dev from Mean ALIE, kcal/mol	35.2904	21.964	23.6821	20.1553	21.2981

## Sheet: ADMET
Descriptors	Standard Values	L-histidinol phosphate	L-Gluconic Acid	4-BROMO-3-(CARBOXYMETHOXY)-5-(4-HYDROXYPHENYL)THIOPHENE-2-CARBOXYLIC ACID	3-O-Methylfructose in Linear Form	Glutamine hydroxamate
#stars	0 – 5	1	2	0	1	3
#amine	0 – 1	1	0	0	0	1
#amidine	0	0	0	0	0	0
#acid	0 – 1	2	1	2	0	1
#amide	0 – 1	0	0	0	0	1
#rotor	0 – 15	8	10	5	10	6
#rtvFG	0 – 2	1	0	0	1	1
CNS	−2 (inactive), +2 (active)	-2	-2	-2	-2	-2
mol MW	130.0 – 725.0	221.152	196.157	373.174	194.184	162.145
dipole	1.0 – 12.5	9.725	3.257	9.317	3.642	2.261
SASA	300.0 – 1000.0	405.621	379.388	522.292	395.846	358.76
FOSA	0.0 – 750.0	79.443	88.218	28.811	208.199	78.954
FISA	7.0 – 330.0	225.121	291.17	256.146	187.647	279.806
PISA	0.0 – 450.0	97.4	0	159.5	0	0
WPSA	0.0 – 175.0	3.656	0	77.835	0	0
volume	500.0 – 2000.0	661.691	608.166	891.155	645.048	550.254
donorHB	0.0 – 6.0	5	5	3	3	5
accptHB	2.0 – 20.0	8	9.5	5.5	9.5	7.2
dip^2/V	0.0 – 0.13	0.142929	0.0174382	0.0974047	0.0205607	0.0092871
ACxDN^.5/SA	0.0 – 0.05	0.0441016	0.0559919	0.0182394	0.0415679	0.044876
glob	0.75 – 0.95	0.905347	0.915018	0.857473	0.912082	0.905184
QPpolrz	13.0 – 70.0	16.12	11.764	27.823	13.24	12.015
QPlogPC16	4.0 – 18.0	7.901	7.182	10.629	6.357	6.381
QPlogPoct	8.0 – 35.0	18.62	16.283	18.475	13.419	15.073
QPlogPw	4.0 – 45.0	16.328	17.087	12.539	13.493	18.113
Type	N/A	small	small	small	small	small
QPlogPo/w	−2.0 – 6.5	-2.627	-1.879	2.082	-1.478	-4.578
QPlogS	−6.5 – 0.5	-0.274	-0.393	-3.506	-0.067	0.942
CIQPlogS	−6.5 – 0.5	-0.265	-0.46	-5.114	-0.252	1.106
QPlogHERG	concern below −5	-0.639	-1.1	-0.984	-2.955	-0.61
QPPCaco	<25 poor, >500 great	1.162	4.348	2.366	164.605	0.742
QPlogBB	−3.0 – 1.2	-1.342	-2.358	-1.869	-1.543	-1.676
QPPMDCK	<25 poor, >500 great	0.624	1.762	3.099	70.375	0.568
QPlogKp	−8.0 – −1.0	-6.62	-5.926	-5.198	-4.018	-8.163
IP(eV)	7.9 – 10.5	9.04	11.052	9.226	10.692	9.961
EA(eV)	−0.9 – 1.7	-0.605	-0.371	1.421	-0.009	-0.409
#metab	1 – 8	3	5	4	6	4
QPlogKhsa	−1.5 – 1.5	-1.274	-1.238	-0.564	-1.226	-1.426
HumanOralAbsorption	-	1	2	1	2	1
PercentHumanOralAbsorption	>80% is high, <25% is poor	12.731	14.41	45.832	57.964	0
SAfluorine	0.0 – 100.0	0	0	0	0	0
SAamideO	0.0 – 35.0	0	0	0	0	34.264
PSA	7.0 – 200.0	122.378	152.649	131.236	112.45	138.28
#NandO	2 – 15	7	7	6	6	6
RuleOfFive	maximum is 4	0	1	0	0	0
RuleOfThree	maximum is 3	1	1	1	0	1
#ringatoms	-	5	0	11	0	0
#in34	-	0	0	0	0	0
#in56	-	5	0	11	0	0
#noncon	-	0	0	0	0	0
#nonHatm	-	14	13	21	13	11
Jm	-	0.0282386	0.0941009	0.000988618	15.9909	0.00975494

## Sheet: WaterMap
Complex 1											Complex 2											Complex 3											Complex 4											Complex 5
Site	Entry ID	Occupancy	Overlap	dH	-TdS	dG	#HB(WW)	#HB(PW)	#HB(LW)		Site	Entry ID	Occupancy	Overlap	dH	-TdS	dG	#HB(WW)	#HB(PW)	#HB(LW)		Site	Entry ID	Occupancy	Overlap	dH	-TdS	dG	#HB(WW)	#HB(PW)	#HB(LW)		Site	Entry ID	Occupancy	Overlap	dH	-TdS	dG	#HB(WW)	#HB(PW)	#HB(LW)		Site	Entry ID	Occupancy	Overlap	dH	-TdS
1	22043	1	0	-3.22	5.64	2.42	0	2.51	0.11		1	22040	1	0	4.96	5.08	10.04	0	1.99	0		1	22049	1	0	-6.06	5.53	-0.53	0	1.99	0		1	22037	1	0	1.93	4.82	6.75	0.02	1.82	0.69		1	22046	1	0	1.1	4.72
2	22043	1	0	-2.99	5.8	2.81	0	1.85	1		2	22040	1	0	-1.14	5.36	4.22	0.02	2.65	0		2	22049	1	0	1.56	5.27	6.83	0	1.99	0		2	22037	1	0	3.52	4.78	8.3	0	2.04	0		2	22046	1	0	3.59	4.82
3	22043	1	0	3.73	4.76	8.49	0	2.03	0		3	22040	1	0	2.92	4.83	7.75	0	2.01	0		3	22049	1	0	2.79	4.92	7.71	0	1.98	0		3	22037	1	0	1.15	4.7	5.85	1.74	0.99	0		3	22046	1	0	3.57	4.59
4	22043	1	0	1.24	4.71	5.95	1.73	0.99	0		4	22040	1	0	-4.09	4.86	0.77	1.02	1.98	0		4	22049	1	0	-4.32	4.83	0.51	1.05	1.98	0		4	22037	1	0	4.09	4.63	8.72	0.83	1.88	0		4	22046	1	0	-1.79	5.16
5	22043	1	0	2.99	4.89	7.88	0.85	1.71	0		5	22040	0.99	0	-3.65	4.35	0.7	1.01	1.26	0		5	22049	0.97	0	2.32	4.08	6.4	0.93	1.8	0		5	22037	1	0	4.21	4.78	8.99	0	1.98	0.08		5	22046	1	0	-3.38	4.82
6	22043	1	0	3.55	4.55	8.1	0.82	1.93	0		6	22040	0.99	0	1.33	4.46	5.79	1.74	1	0		6	22049	0.97	0	1.3	4.08	5.38	1.34	0.99	0		6	22037	1	0	-1.67	5.15	3.48	1.25	1.99	0		6	22046	0.99	0	-0.35	4.86
7	22043	1	0	-1.74	5.15	3.41	1.26	1.99	0		7	22040	0.98	0	-0.89	5.09	4.2	0.73	2.03	0		7	22049	0.96	0	-0.67	4.97	4.3	0.7	2.04	0		7	22037	1	0	-4.09	4.85	0.76	1.02	1.98	0		7	22046	0.98	0	-1.99	3.63
8	22043	1	0	-3.56	4.79	1.23	1.06	1.97	0		8	22040	0.98	0	3.9	4.36	8.26	0.84	1.89	0		8	22049	0.95	0	-0.49	3.35	2.86	1.15	1.82	0		8	22037	0.99	0	4.97	4.21	9.18	0.63	1.86	0		8	22046	0.93	0	-0.83	3.25
9	22043	1	0	0.13	4.89	5.02	0.35	1.96	0.05		9	22040	0.97	0	-1.28	4.72	3.44	1.22	1.99	0		9	22049	0.9	0	-3.37	3.1	-0.27	1.23	0.81	0.96		9	22037	0.98	0	1.35	4.22	5.57	0.4	1.9	0		9	22046	0.92	0	0.33	4.7
10	22043	0.99	0	0.92	4.48	5.4	0.93	1.92	0		10	22040	0.97	0	0.03	4.36	4.39	0.95	1.9	0		10	22049	0.88	0	-0.45	2.6	2.15	1.93	0.98	0		10	22037	0.98	0	-2.42	3.95	1.53	1.33	1.71	0.08		10	22046	0.91	0.01	0.38	4.57
11	22043	0.96	0	1.19	4.13	5.32	0.41	1.91	0		11	22040	0.94	0	0.13	3.79	3.92	2.57	0.01	0		11	22049	0.86	0	-0.53	2.51	1.98	1.76	0.87	0		11	22037	0.93	0	-0.36	3.27	2.91	1.29	1.73	0		11	22046	0.87	0	2.09	2.97
12	22043	0.95	0	1	3.86	4.86	2.23	0	0		12	22040	0.94	0	-1.7	3.42	1.72	1.19	0.38	1.22		12	22049	0.85	0	4.85	3.64	8.49	0.82	1.88	0		12	22037	0.9	0	-2.26	4.28	2.02	1.32	1.9	0		12	22046	0.86	0	-1.38	2.65
13	22043	0.94	0.07	-4.12	4.23	0.11	1.33	0.99	0.8		13	22040	0.94	0	-0.08	3.42	3.34	1.18	1.79	0		13	22049	0.85	0	-3.99	2.95	-1.04	2.44	0.75	0		13	22037	0.89	0	1.09	2.87	3.96	1.63	0.99	0		13	22046	0.85	0	-1.36	4.28
14	22043	0.92	0	0.08	3.4	3.48	1.17	1.82	0		14	22040	0.91	0	-2.7	3.55	0.85	1.6	1.52	0		14	22049	0.84	0	-2.58	3.22	0.64	1.57	1.49	0		14	22037	0.88	0	1.76	3.21	4.97	1.05	1.43	0		14	22046	0.84	0	0.68	2.61
15	22043	0.86	0	-0.41	2.5	2.09	1.68	0.88	0		15	22040	0.83	0	-4.05	2.92	-1.13	2.44	0.75	0		15	22049	0.81	0	1.26	3.03	4.29	0.83	1.62	0		15	22037	0.86	0	-0.7	2.31	1.61	1.89	0.87	0		15	22046	0.84	0	-3.81	2.91
16	22043	0.86	0	-0.8	2.25	1.45	1.93	0.81	0		16	22040	0.82	0	-0.28	2.34	2.06	1.8	0.87	0		16	22049	0.81	0	0.5	3.12	3.62	1.29	1.19	0		16	22037	0.86	0	0.72	2.67	3.39	1.06	1.87	0		16	22046	0.77	0	-0.35	2.37
17	22043	0.86	0	0.71	2.67	3.38	0.86	1.92	0		17	22040	0.82	0	1.01	2.51	3.52	1.08	1.87	0		17	22049	0.81	0	0.84	2.51	3.35	1.1	1.86	0		17	22037	0.84	0	-4.11	2.99	-1.12	2.48	0.76	0		17	22046	0.72	0	-1.29	1.88
18	22043	0.83	0	-3.81	2.96	-0.85	1.66	0.27	0.99		18	22040	0.72	0	0.2	1.73	1.93	1.91	0.66	0		18	22049	0.8	0	-0.88	3.17	2.29	1.37	1.45	0		18	22037	0.81	0.09	1.4	3.9	5.3	0.58	0.99	0.9		18	22046	0.71	0.05	2.49	3.23
19	22043	0.83	0	-2.29	2.85	0.56	1.62	0.6	0.18		19	22040	0.72	0	-0.96	2.17	1.21	1.99	0.89	0		19	22049	0.79	0	-1.43	2.22	0.79	2.05	0.77	0		19	22037	0.79	0	3.4	3.7	7.1	0.83	1.79	0		19	22046	0.69	0	1.36	2.16
20	22043	0.81	0	-3.31	2.73	-0.58	1.43	0.41	0.99		20	22040	0.71	0	-1.06	2.89	1.83	0.69	2.43	0		20	22049	0.72	0	0.38	1.76	2.14	1.75	0.68	0		20	22037	0.73	0	-1.34	1.99	0.65	1.97	0.77	0		20	22046	0.66	0	-0.47	1.61
21	22043	0.8	0	-3.64	2.71	-0.93	2.43	0.73	0		21	22040	0.69	0	-1.21	1.81	0.6	1.92	0.73	0		21	22049	0.72	0	3.17	3.37	6.54	0.82	1.8	0		21	22037	0.69	0	-0.27	1.78	1.51	2.12	0	0.77		21	22046	0.64	0	-0.47	1.71
22	22043	0.73	0	0.29	1.76	2.05	1.85	0.66	0		22	22040	0.65	0	1.04	2.86	3.9	0.34	1.92	0		22	22049	0.71	0	-2.45	2	-0.45	1.62	0	1.05		22	22037	0.68	0	0.28	1.69	1.97	1.85	0.68	0		22	22046	0.63	0	0.6	1.78
23	22043	0.71	0	-1.9	2.78	0.88	1.65	1.45	0		23	22040	0.61	0	-1.09	1.49	0.4	2	0.87	0		23	22049	0.7	0	-0.38	1.84	1.46	1.65	0.87	0		23	22037	0.67	0	-0.49	1.72	1.23	1.61	0.86	0		23	22046	0.6	0	-1.61	1.47
24	22043	0.68	0	-1.43	1.69	0.26	1.67	0	0.82		24	22040	0.6	0	-0.96	1.51	0.55	2.08	0.66	0		24	22049	0.69	0	-1.66	1.82	0.16	1.94	0	0.94		24	22037	0.66	0	-1.64	1.72	0.08	2.16	0.89	0		24	22046	0.6	0	-0.45	1.45
25	22043	0.67	0	-1.3	1.79	0.49	1.9	0.76	0		25	22040	0.58	0	0.39	1.4	1.79	1.35	0.81	0.01		25	22049	0.65	0	0.37	1.77	2.14	1.51	0	0.95		25	22037	0.65	0	0.03	1.95	1.98	1.68	0.88	0		25	22046	0.59	0	-0.7	1.47
26	22043	0.65	0	-2	1.75	-0.25	2.9	0	0		26	22040	0.58	0	-0.09	1.7	1.61	2.18	0.12	0.02		26	22049	0.6	0	-1.07	1.79	0.72	1.26	0.36	0.89		26	22037	0.64	0	-0.66	1.55	0.89	2.04	0.6	0		26	22046	0.57	0	-1.57	1.49
27	22043	0.64	0	-1.37	1.59	0.22	2.55	0.47	0		27	22040	0.58	0	-0.49	1.45	0.96	1.86	0.83	0		27	22049	0.59	0	-0.82	1.54	0.72	1.92	0.82	0		27	22037	0.61	0	0.06	1.71	1.77	1.79	0.19	0		27	22046	0.56	0	0.53	1.41
28	22043	0.61	0	-0.84	1.53	0.69	1.76	0.87	0		28	22040	0.58	0	4.34	1.53	5.87	1.45	0.59	0		28	22049	0.59	0	2.9	1.51	4.41	2.03	0	0		28	22037	0.59	0	-0.7	1.52	0.82	1.83	0.8	0		28	22046	0.55	0	-1.33	1.36
29	22043	0.61	0	-0.72	1.55	0.83	1.72	0.76	0		29	22040	0.58	0	1.91	1.5	3.41	1.95	0.42	0		29	22049	0.59	0	-0.05	1.43	1.38	1.27	0.83	0		29	22037	0.56	0	-1.09	1.33	0.24	1.94	0.97	0		29	22046	0.55	0	-0.39	1.48
30	22043	0.6	0	-1.2	1.5	0.3	2.17	0.85	0		30	22040	0.57	0	-1.26	1.47	0.21	1.88	0	0.97		30	22049	0.58	0	-1.19	1.42	0.23	1.99	0.77	0		30	22037	0.56	0	0.08	1.42	1.5	2.06	0.89	0		30	22046	0.54	0	0.3	1.32
31	22043	0.6	0	-1.35	1.91	0.56	1.49	1.47	0		31	22040	0.57	0	0.11	1.38	1.49	2.08	0.92	0		31	22049	0.57	0	0.31	1.6	1.91	2.03	0.08	0		31	22037	0.55	0	-1.45	1.35	-0.1	2.92	0	0		31	22046	0.52	0	-0.17	2.03
32	22043	0.59	0	-0.39	1.57	1.18	1.81	1.07	0		32	22040	0.55	0	-1.35	1.31	-0.04	2.84	0	0		32	22049	0.56	0	-0.27	1.35	1.08	2.7	0	0		32	22037	0.55	0	-0.45	1.42	0.97	1.68	1.35	0		32	22046	0.51	0	-2.15	1.38
33	22043	0.59	0	-0.35	1.46	1.11	1.66	0.81	0		33	22040	0.55	0	-1.32	1.25	-0.07	2.81	0	0		33	22049	0.56	0	-1.02	1.31	0.29	2.7	0	0		33	22037	0.55	0	-1.88	1.31	-0.57	2.71	0	0		33	22046	0.51	0	2.28	1.25
34	22043	0.58	0	-1.03	1.41	0.38	1.97	0.79	0		34	22040	0.53	0	-0.08	1.37	1.29	1.75	0	0.91		34	22049	0.55	0	-0.02	1.35	1.33	2.08	0.91	0		34	22037	0.54	0	-1.75	1.2	-0.55	2.85	0.01	0		34	22046	0.5	0	-0.99	1.22
35	22043	0.58	0	-1.37	1.41	0.04	2.88	0	0		35	22040	0.53	0	-0.31	1.38	1.07	1.86	1.15	0		35	22049	0.53	0	-0.43	1.33	0.9	1.76	1.26	0		35	22037	0.49	0	2.41	1.18	3.59	2	0	0		35	22046	0.48	0	-1.82	1.96
36	22043	0.57	0	0.16	1.51	1.67	1.87	0.14	0		36	22040	0.48	0	1.89	1.16	3.05	2.27	0	0		36	22049	0.52	0	-1.31	1.27	-0.04	2.9	0	0		36	22037	0.49	0	1.79	1.19	2.98	2.08	0.06	0		36	22046	0.48	0	1.86	1.25
37	22043	0.54	0	-0.5	1.23	0.73	1.9	0.66	0		37	22040	0.47	0	0.06	1.13	1.19	1.93	0.84	0		37	22049	0.52	0	0.08	1.49	1.57	1.53	1	0		37	22037	0.49	0	1.83	1.12	2.95	1.26	0.53	0.01		37	22046	0.46	0	-0.37	1.08
38	22043	0.53	0	0.18	1.26	1.44	1.98	0.83	0		38	22040	0.46	0	-0.15	1.32	1.17	2.15	0	0		38	22049	0.52	0	-1.68	1.36	-0.32	2.15	0.83	0		38	22037	0.47	0	-0.37	1.36	0.99	1.55	1.03	0		38	22046	0.46	0	-1.22	1.03
39	22043	0.5	0	2.7	1.19	3.89	1.58	0.65	0		39	22040	0.44	0	-1	1.14	0.14	1.78	0.64	0		39	22049	0.52	0	-0.62	1.22	0.6	1.97	0.47	0		39	22037	0.45	0	4.3	1.27	5.57	1.43	0.04	0.32		39	22046	0.46	0	-0.6	1.06
40	22043	0.5	0	-1.35	1.25	-0.1	1.54	0	0.98		40	22040	0.43	0	-1.15	0.96	-0.19	2.58	0.34	0		40	22049	0.51	0	-0.69	1.53	0.84	1.97	0.87	0		40	22037	0.43	0	2.82	0.98	3.8	1.81	0.38	0		40	22046	0.45	0	-0.24	1.16
41	22043	0.49	0	0.05	1.14	1.19	1.92	0.53	0		41	22040	0.42	0	-0.21	1.15	0.94	1.24	1.18	0		41	22049	0.51	0	0.61	1.2	1.81	2.21	0.01	0		41	22037	0.43	0	-0.78	0.92	0.14	1.94	0.61	0		41	22046	0.45	0	2.21	1.08
42	22043	0.47	0	-1.16	1.1	-0.06	2.38	0.09	0		42	22040	0.41	0	-0.1	0.85	0.75	2.59	0	0		42	22049	0.49	0	-1.2	1.17	-0.03	2.56	0.27	0		42	22037	0.43	0	-0.59	0.98	0.39	1.68	0.67	0		42	22046	0.44	0	0.46	1.01
43	22043	0.45	0	3.3	1.03	4.33	1.3	0.08	0		43	22040	0.4	0	2.77	0.9	3.67	2.12	0	0		43	22049	0.47	0	-1.58	1.25	-0.33	1.91	0	0.87		43	22037	0.43	0	-0.11	1.02	0.91	1.9	0.91	0		43	22046	0.43	0	0.57	0.99
44	22043	0.45	0	-0.18	1.14	0.96	1.97	0.9	0		44	22040	0.4	0	-0.55	0.89	0.34	1.96	0.49	0		44	22049	0.47	0	0.27	1.08	1.35	1.95	0.45	0		44	22037	0.38	0	0.54	0.83	1.37	1.89	0.45	0		44	22046	0.38	0	-0.01	1.11
45	22043	0.44	0	2.68	1.07	3.75	1.99	0	0		45	22040	0.4	0	0.75	0.84	1.59	2.22	0.23	0		45	22049	0.47	0	4.42	1.2	5.62	1.41	0.47	0		45	22037	0.38	0	-2.41	0.91	-1.5	2.08	0.96	0		45	22046	0.37	0	-1.48	1.06
46	22043	0.42	0	-0.89	0.92	0.03	2.63	0	0		46	22040	0.39	0	-0.38	1.06	0.68	1.62	0.88	0		46	22049	0.47	0	0.04	1.16	1.2	1.94	0.85	0		46	22037	0.38	0	0.97	0.81	1.78	2.1	0.6	0		46	22046	0.36	0	1.14	0.78
47	22043	0.42	0	0.5	0.98	1.48	1.86	0.26	0.01		47	22040	0.38	0	-0.1	0.82	0.72	2.06	0.59	0		47	22049	0.45	0	0.82	1.04	1.86	2.15	0.67	0		47	22037	0.38	0	0.95	0.83	1.78	1.86	0.17	0.01		47	22046	0.36	0	-0.14	0.78
48	22043	0.41	0	0.85	1.12	1.97	1.08	1.3	0		48	22040	0.38	0	-0.28	0.87	0.59	2.61	0	0		48	22049	0.45	0	2.35	1.05	3.4	1.4	0.8	0		48	22037	0.37	0	0.33	0.78	1.11	2.4	0	0		48	22046	0.36	0	0.2	0.73
49	22043	0.41	0	-0.29	0.94	0.65	2.15	0.74	0		49	22040	0.38	0	-0.98	0.93	-0.05	2.42	0.36	0		49	22049	0.44	0	1.18	0.98	2.16	2.4	0	0		49	22037	0.36	0	1.64	0.74	2.38	2.11	0	0.17		49	22046	0.35	0	0.15	0.86
50	22043	0.4	0	-0.9	0.9	0	1.93	0.7	0		50	22040	0.38	0	0.38	0.86	1.24	1.96	0	0.75		50	22049	0.44	0	2.24	0.98	3.22	2.15	0	0		50	22037	0.36	0	-0.12	0.74	0.62	2.09	0.59	0		50	22046	0.34	0	2.04	0.77
51	22043	0.4	0	0.45	1.34	1.79	1.88	0.95	0		51	22040	0.38	0	0.26	0.83	1.09	1.98	0.26	0.02		51	22049	0.44	0	-0.1	1.01	0.91	1.62	0.65	0		51	22037	0.35	0	-0.94	0.85	-0.09	2.02	0.91	0		51	22046	0.34	0	-0.69	0.75
52	22043	0.38	0	0.03	0.8	0.83	2.58	0	0		52	22040	0.37	0	0.66	0.77	1.43	1.81	0	0.75		52	22049	0.43	0	-0.49	0.9	0.41	2.57	0	0		52	22037	0.34	0	0.24	0.71	0.95	2.58	0	0		52	22046	0.33	0	-0.89	0.8
53	22043	0.38	0	0.49	0.78	1.27	2.16	0.52	0		53	22040	0.36	0	0.61	0.71	1.32	2.46	0	0		53	22049	0.43	0	0.72	0.9	1.62	2.4	0.01	0		53	22037	0.33	0	-0.48	0.69	0.21	2.62	0	0		53	22046	0.33	0	3.06	0.69
54	22043	0.38	0	-2.26	0.98	-1.28	2.08	0.94	0		54	22040	0.35	0	2.39	0.81	3.2	1.79	0.78	0		54	22049	0.4	0	0.5	0.87	1.37	2.51	0	0		54	22037	0.33	0	-0.57	0.74	0.17	2.1	0.69	0		54	22046	0.33	0	1.1	0.67
55	22043	0.37	0	-0.12	0.79	0.67	2.1	0.54	0		55	22040	0.35	0	1.16	0.72	1.88	2.03	0.14	0		55	22049	0.39	0	-0.73	0.98	0.25	2	0.98	0		55	22037	0.32	0	-1.97	0.74	-1.23	1.94	0.89	0		55	22046	0.32	0	1.25	0.66
56	22043	0.36	0	-0.66	0.76	0.1	2.51	0.05	0		56	22040	0.34	0	-1.05	0.83	-0.22	2.02	0.9	0		56	22049	0.39	0	0.47	0.84	1.31	2.16	0	0		56	22037	0.32	0	1.17	0.67	1.84	2.23	0.01	0		56	22046	0.32	0	0.96	0.72
57	22043	0.36	0	1.19	0.72	1.91	2.31	0	0		57	22040	0.34	0	-0.56	0.78	0.22	2.08	0.63	0		57	22049	0.39	0	-2.39	0.96	-1.43	2.04	0.95	0		57	22037	0.32	0	1.07	0.65	1.72	2.27	0	0		57	22046	0.31	0	0.17	0.75
58	22043	0.35	0	0.6	0.79	1.39	2.07	0.61	0		58	22040	0.32	0	-0.12	0.69	0.57	2.55	0	0		58	22049	0.38	0	-1.45	0.87	-0.58	1.94	0	0.71		58	22037	0.32	0	-0.88	0.69	-0.19	2.8	0	0		58	22046	0.3	0	0.79	0.61
59	22043	0.33	0	-0.99	0.77	-0.22	1.95	0.9	0		59	22040	0.32	0	-0.16	0.75	0.59	1.95	0.9	0		59	22049	0.37	0	0.21	0.87	1.08	1.92	0.67	0		59	22037	0.32	0	3.22	0.69	3.91	2.03	0	0		59	22046	0.3	0	-0.06	0.59
60	22043	0.33	0	0.39	0.68	1.07	2.5	0	0		60	22040	0.31	0	0.36	0.65	1.01	2.36	0.08	0		60	22049	0.37	0	-1.94	0.95	-0.99	2.06	0	0.93		60	22037	0.31	0	-0.35	0.64	0.29	2.58	0.01	0		60	22046	0.3	0	-0.07	0.64
61	22043	0.33	0	-0.55	0.66	0.11	2.58	0	0		61	22040	0.31	0	-0.57	0.65	0.08	2.38	0.05	0		61	22049	0.37	0	0.1	0.82	0.92	2.61	0	0		61	22037	0.3	0	0.18	0.73	0.91	1.91	0.88	0		61	22046	0.3	0	0.05	0.65
62	22043	0.32	0	-2.04	0.73	-1.31	1.99	0.89	0		62	22040	0.31	0	0.42	0.63	1.05	2.55	0	0		62	22049	0.37	0	0.17	0.76	0.93	2.16	0.5	0		62	22037	0.3	0	0.53	0.6	1.13	2.48	0	0		62	22046	0.3	0	0.78	0.61
63	22043	0.32	0	1.77	0.7	2.47	2.08	0	0		63	22040	0.31	0	0.45	0.75	1.2	1.97	0.92	0		63	22049	0.36	0	-1.95	0.88	-1.07	1.71	0	0.95		63	22037	0.29	0	-0.04	0.69	0.65	2	0.9	0		63	22046	0.29	0	0.04	0.67
64	22043	0.32	0	-1.94	0.7	-1.24	1.93	0.95	0		64	22040	0.3	0	0.79	0.64	1.43	2.34	0.02	0		64	22049	0.35	0	-0.8	0.76	-0.04	2.03	0.61	0		64	22037	0.29	0	0.61	0.62	1.23	1.96	0.21	0		64	22046	0.29	0	0.62	0.72
65	22043	0.31	0	-0.06	0.72	0.66	1.92	0.9	0		65	22040	0.3	0	-0.3	0.68	0.38	2.15	0.54	0		65	22049	0.35	0	-0.73	0.77	0.04	2.05	0.59	0		65	22037	0.28	0	1.13	0.56	1.69	2.38	0	0		65	22046	0.29	0	-0.5	0.84
66	22043	0.31	0	-0.17	0.66	0.49	2.34	0	0		66	22040	0.29	0	-0.41	0.6	0.19	2.55	0	0		66	22049	0.34	0	-1.07	0.79	-0.28	2.08	0.86	0		66	22037	0.28	0	1.35	0.59	1.94	2.03	0.15	0		66	22046	0.29	0	-0.48	0.61
67	22043	0.31	0	-0.94	0.65	-0.29	2.73	0	0		67	22040	0.29	0	-0.29	0.63	0.34	2.58	0	0		67	22049	0.34	0	0.08	0.78	0.86	2.49	0	0		67	22037	0.28	0	0.9	1.02	1.92	0.49	2.39	0		67	22046	0.28	0	-0.1	0.61
68	22043	0.31	0	-0.57	0.61	0.04	2.55	0	0		68	22040	0.29	0	0.74	0.6	1.34	2.35	0.36	0		68	22049	0.33	0	-0.47	0.72	0.25	2.67	0	0		68	22037	0.28	0	-2.37	0.65	-1.72	1.91	0.96	0		68	22046	0.28	0	-0.26	0.56
69	22043	0.3	0	0.67	0.61	1.28	1.91	0	0.6		69	22040	0.29	0	0.74	0.62	1.36	1.79	0.06	0.48		69	22049	0.33	0	-0.01	0.68	0.67	2.31	0.1	0		69	22037	0.28	0	0.04	1.05	1.09	0.34	2.11	0
70	22043	0.29	0	0	0.61	0.61	2.26	0.45	0		70	22040	0.28	0	-0.94	0.66	-0.28	1.82	0.59	0		70	22049	0.32	0	-2.02	0.76	-1.26	2.09	0.87	0		70	22037	0.28	0	-0.86	0.65	-0.21	2.12	0.76	0
71	22043	0.28	0	-0.14	0.59	0.45	2.71	0	0		71	22040	0.28	0	-0.62	0.64	0.02	2.65	0	0		71	22049	0.32	0	0.24	0.73	0.97	1.92	0.88	0
72	22043	0.28	0	-1.73	0.68	-1.05	2.05	0.34	0		72	22040	0.28	0	0.28	0.62	0.9	2.04	0.41	0		72	22049	0.31	0	-0.76	0.73	-0.03	2.1	0	0.73
73	22043	0.28	0	0.14	0.58	0.72	2.57	0	0		73	22040	0.28	0	0.88	0.62	1.5	2.27	0.22	0		73	22049	0.31	0	0.03	1.22	1.25	0.04	2.19	0
74	22043	0.28	0	0.05	0.59	0.64	2.11	0.75	0		74	22040	0.28	0	0	0.57	0.57	2.52	0	0		74	22049	0.3	0	0.84	0.62	1.46	2.29	0.43	0
75	22043	0.28	0	-0.12	0.57	0.45	2.27	0.26	0													75	22049	0.3	0	-0.44	0.66	0.22	2.71	0	0
																						76	22049	0.3	0	-0.7	0.66	-0.04	2.68	0	0
																						77	22049	0.29	0	0.19	0.59	0.78	2.44	0	0
																						78	22049	0.29	0	-0.51	0.56	0.05	2.63	0	0
																						79	22049	0.28	0	-0.43	0.6	0.17	2.6	0	0
[truncated: 4 more columns]

## Sheet: MMGBSA
Frame No	title	r_psp_MMGBSA_dG_Bind	r_psp_MMGBSA_dG_Bind_Coulomb	r_psp_MMGBSA_dG_Bind_Covalent	r_psp_MMGBSA_dG_Bind_Hbond	r_psp_MMGBSA_dG_Bind_Lipo	r_psp_MMGBSA_dG_Bind_Packing	r_psp_MMGBSA_dG_Bind_SelfCont	r_psp_MMGBSA_dG_Bind_Solv_GB	r_psp_MMGBSA_dG_Bind_Solv_SA	r_psp_MMGBSA_dG_Bind_vdW	r_psp_Lig_Strain_Energy	r_psp_Lig_Strain_Coulomb	r_psp_Lig_Strain_Covalent	r_psp_Lig_Strain_Hbond	r_psp_Lig_Strain_Lipo	r_psp_Lig_Strain_Packing	r_psp_Lig_Strain_SelfCont	r_psp_Lig_Strain_Solv_GB	r_psp_Lig_Strain_Solv_SA	r_psp_Lig_Strain_vdW	r_psp_Ligand_Energy	r_psp_Ligand_Coulomb	r_psp_Ligand_Covalent	r_psp_Ligand_Hbond	r_psp_Ligand_Lipo	r_psp_Ligand_Packing	r_psp_Ligand_SelfCont	r_psp_Ligand_Solv_GB	r_psp_Ligand_Solv_SA	r_psp_Ligand_vdW	r_psp_Complex_Energy	r_psp_Complex_Coulomb	r_psp_Complex_Covalent	r_psp_Complex_Hbond	r_psp_Complex_Lipo	r_psp_Complex_Packing	r_psp_Complex_SelfCont	r_psp_Complex_Solv_GB	r_psp_Complex_Solv_SA	r_psp_Complex_vdW	r_psp_Ligand_Energy	r_psp_Ligand_Coulomb	r_psp_Ligand_Covalent	r_psp_Ligand_Hbond	r_psp_Ligand_Lipo	r_psp_Ligand_Packing	r_psp_Ligand_SelfCont	r_psp_Ligand_Solv_GB
0	Complex_1	-24.3191	12.7514	2.14117	-2.91821	-5.06606	-0.0285431	0	-9.57894		-21.62	2.32799	1.54896	2.14117	0	-0.00359037	0	0	-1.79393		0.435384	-67.9411	-50.4752	5.73626	0	-0.248161	0	0	-23.1641		0.21011	-6996.25	-8344.95	4076.41	-135.082	-567.33	-24.2409	-24.7202	-1371.55		-604.773	-67.9411	-50.4752	5.73626	0	-0.248161	0	0	-23.1641
1	Complex_1	-22.6208	7.38798	1.9181	-3.92089	-3.94374	-0.0355403	0	-3.67083		-20.3559	2.01249	-1.27983	1.9181	0	0.0123569	0	0	1.53277		-0.170907	-68.1109	-49.7748	5.74351	0	-0.248254	0	0	-24.011		0.179606	-7102.21	-8360.82	4015.99	-129.031	-572.811	-23.6749	-21.3546	-1368.02		-642.489	-68.1109	-49.7748	5.74351	0	-0.248254	0	0	-24.011
2	Complex_1	-27.1223	12.1861	0.222688	-2.35759	-5.24294	-0.0115921	0	-4.88952		-27.0294	0.785416	0.740448	0.222688	0	0.00140054	0	0	-0.319113		0.139993	-66.997	-51.6735	7.01607	0	-0.248243	0	0	-22.1844		0.0930872	-7018.49	-8380.92	4056.35	-132.671	-574.069	-21.9292	-25.6191	-1357.68		-581.95	-66.997	-51.6735	7.01607	0	-0.248243	0	0	-22.1844
3	Complex_1	-24.7954	13.8648	0.321015	-2.60627	-5.63726	-0.236705	0	-7.48177		-23.0191	1.18949	0.123157	0.321015	0	-0.00414235	0	0	-0.0602274		0.809689	-66.8868	-51.6686	7.01472	0	-0.248233	0	0	-22.0759		0.0911644	-7071.99	-8349.33	4051.43	-134.799	-573.988	-23.3574	-25.3652	-1355		-661.569	-66.8868	-51.6686	7.01472	0	-0.248233	0	0	-22.0759
4	Complex_1	-28.2348	13.5212	0.208221	-2.36275	-5.54696	-0.0074171	0	-5.58451		-28.4625	0.558723	0.715812	0.208221	0	0.00440072	0	0	-0.479666		0.109955	-66.8825	-51.34	7.00186	0	-0.248222	0	0	-22.3906		0.0944362	-7154.64	-8369.21	4002.01	-132.881	-571.599	-22.3235	-21.6153	-1378.14		-660.878	-66.8825	-51.34	7.00186	0	-0.248222	0	0	-22.3906
5	Complex_1	-26.5777	12.9003	0.554312	-1.8426	-5.6069	-0.00569351	0	-5.92394		-26.6533	1.12465	0.0234734	0.554312	0	0.00699149	0	0	0.180545		0.359326	-67.9637	-49.7725	5.74108	0	-0.248299	0	0	-23.8651		0.181118	-6987.85	-8330.12	4097.88	-131.619	-562.437	-17.5725	-31.2612	-1404.79		-607.927	-67.9637	-49.7725	5.74108	0	-0.248299	0	0	-23.8651
6	Complex_1	-24.2987	5.00114	2.05986	-3.61772	-5.26952	-0.000692867	0	-0.0912652		-22.3805	2.78416	-0.646575	2.05986	0	0.00412433	0	0	0.839706		0.527043	-68.1387	-50.4704	5.73563	0	-0.248217	0	0	-23.365		0.209348	-6978.81	-8330.54	4061.87	-133.659	-562.731	-20.3476	-26.4201	-1363.56		-603.438	-68.1387	-50.4704	5.73563	0	-0.248217	0	0	-23.365
7	Complex_1	-27.9047	5.42639	0.996875	-3.13385	-5.56916	-0.000436812	0	1.33066		-26.9551	1.87753	1.30491	0.996875	0	0.00767297	0	0	-0.533043		0.101109	-68.0551	-50.4745	5.73435	0	-0.24823	0	0	-23.2787		0.212057	-7212.94	-8402.67	3977.17	-136.96	-578.303	-26.6398	-29.1451	-1385.82		-630.568	-68.0551	-50.4745	5.73435	0	-0.24823	0	0	-23.2787
8	Complex_1	-27.3342	5.93903	1.46188	-3.61345	-4.95873	-0.0203627	0	-0.901602		-25.241	2.37157	0.800314	1.46188	0	0.00366895	0	0	-0.101713		0.207418	-68.0867	-50.4709	5.73489	0	-0.248216	0	0	-23.3127		0.210196	-7172.67	-8355.78	4043.53	-130.216	-577.051	-25.2098	-16.4004	-1386.23		-725.303	-68.0867	-50.4709	5.73489	0	-0.248216	0	0	-23.3127
9	Complex_1	-29.7457	9.07687	0.423945	-3.00746	-4.9662	-0.192383	0	-2.81081		-28.2697	0.858042	0.929009	0.423945	0	0.00351553	0	0	-0.300032		-0.198397	-67.9923	-50.4682	5.73704	0	-0.248158	0	0	-23.22		0.206989	-7122.06	-8362.9	4051.88	-132.491	-573.72	-27.3239	-17.4318	-1398.01		-662.065	-67.9923	-50.4682	5.73704	0	-0.248158	0	0	-23.22
10	Complex_1	-27.6519	6.01375	0.731389	-3.76036	-5.73552	-0.0104907	0	-0.0790071		-24.8117	2.04322	0.966484	0.731389	0	-0.00264541	0	0	-0.0673528		0.415349	-68.0692	-50.4751	5.73437	0	-0.248225	0	0	-23.2921		0.211864	-7100.22	-8355.66	3991.8	-134.176	-574.989	-27.5302	-18.5492	-1389.45		-591.654	-68.0692	-50.4751	5.73437	0	-0.248225	0	0	-23.2921
11	Complex_1	-27.7646	8.09225	1.32828	-3.16935	-5.41334	-0.063485	0	-0.553106		-27.9858	2.29979	1.37712	1.32828	0	0.00460017	0	0	-0.439977		0.029768	-68.0004	-50.4725	5.73553	0	-0.24822	0	0	-23.2254		0.210119	-7103.15	-8290.06	4074.16	-127.972	-573.969	-26.2161	-18.5253	-1413.75		-726.807	-68.0004	-50.4725	5.73553	0	-0.24822	0	0	-23.2254
12	Complex_1	-28.523	7.89444	0.467131	-3.09238	-5.35925	-0.2629	0	-1.31256		-26.8574	1.16405	0.733575	0.467131	0	0.00216893	0	0	-0.281246		0.242424	-67.9224	-50.4753	5.73445	0	-0.248239	0	0	-23.1456		0.212324	-7124.73	-8321.76	3989.79	-131.848	-569.714	-25.1726	-25.2465	-1389.25		-651.531	-67.9224	-50.4753	5.73445	0	-0.248239	0	0	-23.1456
13	Complex_1	-30.288	3.75163	0.755851	-3.83925	-5.36688	-0.00392301	0	1.30374		-26.8891	1.81386	1.07801	0.755851	0	0.00164506	0	0	-0.358801		0.337149	-68.0367	-50.476	5.73481	0	-0.248225	0	0	-23.2584		0.211158	-7084.14	-8378.99	4042.86	-136.201	-569.861	-21.5653	-19.8872	-1339.85		-660.638	-68.0367	-50.476	5.73481	0	-0.248225	0	0	-23.2584
14	Complex_1	-25.8301	8.21304	-0.985897	-2.31328	-5.15879	-0.00580148	0	-1.17876		-24.4006	-0.398642	1.6958	-0.985897	0	-0.00147861	0	0	-1.37377		0.266706	-66.8588	-51.6769	7.01558	0	-0.248221	0	0	-22.0423		0.0930115	-7107.48	-8389.22	4050.62	-132.462	-558.03	-21.503	-20.9616	-1368.48		-667.448	-66.8588	-51.6769	7.01558	0	-0.248221	0	0	-22.0423
15	Complex_1	-1.09139e-11	0	0	0	0	0	0	-7.50333e-12		5.68434e-13	0	0	0	0	0	0	0	0		0	-68.0063	-50.461	5.73638	0	-0.248132	0	0	-23.2389		0.205392	-6950.03	-8344.79	4117.08	-130.103	-561.244	-22.0964	-18.7524	-1388.25		-601.884	-68.0063	-50.461	5.73638	0	-0.248132	0	0	-23.2389
16	Complex_1	0.0196681	-0.00184057	0.000489281	0	-9.48577e-06	0	0	0.0209575		7.13746e-05	0.0196681	-0.00184057	0.000489281	0	-9.48577e-06	0	0	0.0209575		7.13746e-05	-68.1651	-50.4644	5.7345	0	-0.248193	0	0	-23.3954		0.208393	-7056.93	-8297.38	4002.53	-130.112	-547.437	-26.3137	-27.9866	-1381.64		-648.593	-68.1651	-50.4644	5.7345	0	-0.248193	0	0	-23.3954
17	Complex_1	-1.63709e-11	-5.45697e-12	-4.54747e-13	0	1.13687e-13	0	0	-9.77707e-12		3.41061e-13	0	0	0	0	0	0	0	0		0	-68.071	-50.4685	5.73583	0	-0.248203	0	0	-23.3002		0.210023	-7047.85	-8305.35	4067.11	-126.523	-554.866	-23.8103	-25.751	-1436.55		-642.116	-68.071	-50.4685	5.73583	0	-0.248203	0	0	-23.3002
18	Complex_1	6.36646e-12	-1.81899e-12	2.27374e-12	0	1.13687e-13	0	0	3.18323e-12		1.02318e-12	0	0	0	0	0	0	0	0		0	-67.9624	-49.7752	5.74193	0	-0.248298	0	0	-23.8623		0.181451	-7031.56	-8350.83	4057.13	-128	-555.646	-23.9138	-26.4783	-1397.95		-605.863	-67.9624	-49.7752	5.74193	0	-0.248298	0	0	-23.8623
19	Complex_1	-1.81899e-11	-7.27596e-12	-9.09495e-13	0	1.13687e-13	0	0	-7.7307e-12		-9.09495e-13	0	0	0	0	0	0	0	0		0	-68.034	-49.7731	5.74069	0	-0.248347	0	0	-23.9363		0.183039	-7093.6	-8378.43	4004.82	-130.089	-561.367	-26.1419	-25.3517	-1370.62		-606.42	-68.034	-49.7731	5.74069	0	-0.248347	0	0	-23.9363
20	Complex_1	4.54747e-12	-1.81899e-12	0	0	0	0	0	6.59384e-12		3.41061e-13	0	0	0	0	0	0	0	0		0	-67.9857	-50.4644	5.73815	0	-0.248187	0	0	-23.2158		0.204517	-7185.41	-8327.64	3951.12	-127.242	-562.84	-25.6008	-26.5797	-1385.92		-680.71	-67.9857	-50.4644	5.73815	0	-0.248187	0	0	-23.2158
21	Complex_1	-6.36646e-12	-5.45697e-12	-9.09495e-13	0	-1.13687e-13	0	0	-1.81899e-12		-5.68434e-13	0	0	0	0	0	0	0	0		0	-68.1292	-50.4999	5.732	0	-0.248399	0	0	-23.3351		0.222245	-7112.19	-8281.94	4010.49	-126.494	-562.119	-23.2316	-31.7531	-1398.96		-698.187	-68.1292	-50.4999	5.732	0	-0.248399	0	0	-23.3351
22	Complex_1	-24.4996	19.342	0.967176	-2.27631	-5.98701	-0.704165	0	-12.3413		-23.5	2.09532	0.284413	0.967176	0	-0.0064503	0	0	0.239017		0.611167	-67.927	-49.7799	5.74122	0	-0.24833	0	0	-23.824		0.183886	-7158.75	-8320.93	4002.91	-131.732	-570.203	-25.3277	-25.182	-1393.37		-694.923	-67.927	-49.7799	5.74122	0	-0.24833	0	0	-23.824
23	Complex_1	-22.9585	17.2224	0.406939	-2.03984	-5.48506	-0.633406	0	-11.313		-21.1166	1.06367	-0.673487	0.406939	0	-0.00341346	0	0	0.585912		0.747715	-67.975	-49.7914	5.74127	0	-0.24835	0	0	-23.8644		0.187866	-7102.54	-8345.12	4058.79	-130.642	-564.927	-27.1591	-19.5422	-1382.58		-691.364	-67.975	-49.7914	5.74127	0	-0.24835	0	0	-23.8644
24	Complex_1	-22.9697	15.8202	0.0574066	-1.95212	-4.88542	-0.255974	0	-9.68604		-22.0677	0.586999	0.517186	0.0574066	0	-0.004106	0	0	-0.199634		0.216147	-68.1104	-50.4813	5.73893	0	-0.248123	0	0	-23.3286		0.208618	-7030.17	-8324.69	4072.86	-127.954	-560.695	-25.8684	-26.2228	-1364.09		-673.501	-68.1104	-50.4813	5.73893	0	-0.248123	0	0	-23.3286
25	Complex_1	-22.5987	13.1194	0.129348	-2.052	-5.30736	-0.24877	0	-5.40204		-22.8373	0.506597	0.45558	0.129348	0	-0.00419816	0	0	-0.422525		0.348393	-67.9534	-50.4773	5.7331	0	-0.248244	0	0	-23.1747		0.213762	-7037.27	-8341.62	4099	-131.858	-567.794	-26.8373	-23.1298	-1388.35		-656.68	-67.9534	-50.4773	5.7331	0	-0.248244	0	0	-23.1747
26	Complex_1	-22.4922	12.9384	0.887426	-2.35701	-5.12658	-2.77362	0	-5.41314		-20.6477	2.12509	0.904292	0.887426	0	-0.00437297	0	0	-0.0429281		0.380668	-67.996	-49.7801	5.74165	0	-0.248367	0	0	-23.8937		0.184527	-7100.06	-8333.2	4044.89	-130.903	-567.236	-30.2557	-24.4601	-1390.69		-668.213	-67.996	-49.7801	5.74165	0	-0.248367	0	0	-23.8937
27	Complex_1	-23.1989	15.3793	0.459326	-2.00359	-5.82499	-0.62421	0	-8.29555		-22.2892	1.11857	0.959857	0.459326	0	-0.00302649	0	0	-0.821985		0.524402	-66.8272	-51.6919	7.01662	0	-0.248196	0	0	-22.0012		0.0974019	-7035.03	-8256.59	4046.3	-126.667	-572.786	-26.5245	-28.5841	-1414.32		-655.869	-66.8272	-51.6919	7.01662	0	-0.248196	0	0	-22.0012
28	Complex_1	-26.8467	9.74176	0.518997	-3.31164	-5.18275	-0.995012	0	-4.8263		-22.7918	1.24063	0.0502392	0.518997	0	-0.00445498	0	0	-0.0331605		0.709009	-66.8825	-51.6744	7.01115	0	-0.248264	0	0	-22.0669		0.0958525	-7074.38	-8290.05	3971.64	-131.106	-559.501	-25.7726	-23.5494	-1378.38		-637.668	-66.8825	-51.6744	7.01115	0	-0.248264	0	0	-22.0669
29	Complex_1	-27.0416	15.9346	0.650715	-3.20645	-5.37096	-0.990353	0	-10.4549		-23.6044	1.15576	0.263421	0.650715	0	-0.00501383	0	0	-0.323367		0.570008	-66.9448	-51.6994	7.01378	0	-0.248295	0	0	-22.1135		0.102645	-7028.76	-8288.35	4051.22	-126.481	-549.43	-24.9256	-19.0339	-1417.73		-654.033	-66.9448	-51.6994	7.01378	0	-0.248295	0	0	-22.1135
30	Complex_1	-21.7576	10.6148	1.85167	-3.30624	-5.00112	-1.48239	0	-5.79144		-18.6429	3.33694	0.2341	1.85167	0	-0.00111534	0	0	0.232677		1.01961	-67.9017	-49.7592	5.74247	0	-0.24826	0	0	-23.8124		0.175744	-7019.55	-8310.18	4020.99	-126.907	-566.342	-27.7788	-20.0233	-1385.45		-603.87	-67.9017	-49.7592	5.74247	0	-0.24826	0	0	-23.8124
31	Complex_1	-24.6565	13.7069	0.492093	-1.9099	-4.76197	-0.254813	0	-6.39795		-25.5309	1.04516	1.06369	0.492093	0	0.00388821	0	0	-0.664951		0.15044	-66.8802	-51.6686	7.01086	0	-0.248276	0	0	-22.0677		0.0934631	-7020.92	-8278.87	4052.45	-124.886	-562.43	-22.9098	-15.887	-1401.13		-667.255	-66.8802	-51.6686	7.01086	0	-0.248276	0	0	-22.0677
32	Complex_1	-24.2209	10.9563	1.86545	-1.94483	-4.80779	-0.448624	0	-3.74634		-26.0951	2.81667	0.0126775	1.86545	0	0.00703552	0	0	0.588775		0.342735	-67.9503	-49.7719	5.73995	0	-0.248323	0	0	-23.8517		0.18165	-7042.73	-8273.78	4067.1	-126.813	-572.726	-24.171	-12.4084	-1429.81		-670.116	-67.9503	-49.7719	5.73995	0	-0.248323	0	0	-23.8517
33	Complex_1	-21.6119	7.93821	1.57108	-3.63337	-4.89946	-0.176565	0	-3.05662		-19.3551	2.67213	0.608184	1.57108	0	0.000254293	0	0	-0.300976		0.793585	-67.9559	-50.4791	5.73313	0	-0.248273	0	0	-23.1766		0.214973	-7054.07	-8285.42	3955.41	-128.936	-570.076	-22.1476	-17.6437	-1390.3		-594.962	-67.9559	-50.4791	5.73313	0	-0.248273	0	0	-23.1766
34	Complex_1	-22.687	15.3792	0.508777	-1.69123	-5.17079	-0.283422	0	-10.5217		-20.9078	0.972424	0.228863	0.508777	0	-0.00404126	0	0	-0.359314		0.598139	-68.0284	-50.4777	5.73433	0	-0.248226	0	0	-23.2499		0.213007	-7022.65	-8243.8	3993.05	-126.579	-564.793	-25.6957	-13.9122	-1438.71		-602.222	-68.0284	-50.4777	5.73433	0	-0.248226	0	0	-23.2499
35	Complex_1	-21.6903	17.7503	0.223778	-2.0904	-5.1867	-0.0232821	0	-10.6467		-21.7172	0.826552	0.691784	0.223778	0	0.00378124	0	0	-0.272583		0.179792	-68.0231	-50.4754	5.73404	0	-0.248258	0	0	-23.2467		0.213209	-7085.31	-8328.1	3951.11	-129.933	-569.466	-22.3154	-12.9583	-1386.72		-586.924	-68.0231	-50.4754	5.73404	0	-0.248258	0	0	-23.2467
36	Complex_1	-23.6775	15.3261	0.933028	-1.93232	-5.9683	-0.605477	0	-10.0105		-21.4201	1.89726	-0.252522	0.933028	0	-0.00325467	0	0	0.32627		0.893734	-67.8011	-49.7779	5.74062	0	-0.248336	0	0	-23.6991		0.183612	-6984.86	-8297.54	4061.51	-126.532	-568.521	-23.9621	-17.1333	-1395.52		-617.171	-67.8011	-49.7779	5.74062	0	-0.248336	0	0	-23.6991
37	Complex_1	-21.1531	15.2048	0.068245	-1.98486	-4.88771	-0.0128789	0	-9.19263		-20.3481	0.532556	0.164643	0.068245	0	-0.00229762	0	0	-0.206592		0.508557	-68.1212	-50.4745	5.73477	0	-0.248229	0	0	-23.3448		0.211545	-7006.93	-8265.17	3968.08	-127.389	-567.513	-24.5378	-18.8343	-1407.06		-564.502	-68.1212	-50.4745	5.73477	0	-0.248229	0	0	-23.3448
38	Complex_1	-23.2774	13.4076	0.249078	-2.05331	-5.82774	-0.130746	0	-7.72865		-21.1936	1.13542	0.241883	0.249078	0	-0.00527128	0	0	-0.117356		0.767081	-68.1009	-50.4561	5.73415	0	-0.248201	0	0	-23.336		0.205169	-6997.32	-8252.51	4016.41	-128.439	-567.103	-22.4915	-21.4251	-1403.11		-618.648	-68.1009	-50.4561	5.73415	0	-0.248201	0	0	-23.336
39	Complex_1	-22.8298	15.692	0.0140822	-2.10952	-4.99614	-0.0118157	0	-10.0451		-21.3733	0.46245	0.858536	0.0140822	0	-9.62542e-05	0	0	-0.548748		0.138677	-68.0957	-50.4746	5.73574	0	-0.248172	0	0	-23.3176		0.208878	-7103.62	-8257.33	3998.87	-127.727	-570.469	-20.3477	-14.6206	-1438.61		-673.379	-68.0957	-50.4746	5.73574	0	-0.248172	0	0	-23.3176
40	Complex_1	-23.1181	14.4689	0.446287	-2.36367	-5.74236	-0.0899232	0	-8.38761		-21.4498	1.25503	0.769999	0.446287	0	-0.0029692	0	0	-0.324928		0.366637	-68.0885	-50.4632	5.73421	0	-0.248202	0	0	-23.3199		0.208507	-7051.87	-8291.36	4057.56	-125.962	-562.692	-22.2898	-16.5285	-1407.46		-683.134	-68.0885	-50.4632	5.73421	0	-0.248202	0	0	-23.3199
41	Complex_1	-20.2222	16.2119	0.175607	-2.34695	-4.63717	-0.00811152	0	-9.21758		-20.3999	0.530158	0.467727	0.175607	0	0.000907174	0	0	-0.211648		0.0975642	-68.0144	-49.7742	5.74084	0	-0.248313	0	0	-23.9146		0.181948	-7034.86	-8288.6	4020.71	-128.736	-563.369	-24.813	-17.656	-1418.11		-614.288	-68.0144	-49.7742	5.74084	0	-0.248313	0	0	-23.9146
42	Complex_1	-23.541	13.0541	1.03792	-2.06875	-6.12696	-0.112887	0	-6.38151		-22.9429	1.73889	0.602626	1.03792	0	-0.00579542	0	0	-0.397362		0.501502	-68.1249	-50.4566	5.73573	0	-0.248178	0	0	-23.3604		0.204622	-7089.7	-8328.42	4044.86	-129.155	-575.581	-20.9577	-18.7139	-1403.78		-657.952	-68.1249	-50.4566	5.73573	0	-0.248178	0	0	-23.3604
43	Complex_1	-23.9866	15.7348	0.584174	-2.07211	-5.61397	-0.618154	0	-9.70066		-22.3006	1.14866	0.0966325	0.584174	0	-0.00406012	0	0	-0.0846217		0.556539	-68.0264	-50.4804	5.73475	0	-0.248236	0	0	-23.2453		0.21279	-7165.01	-8321.77	3953.44	-128.709	-568.105	-24.2724	-19.0328	-1405.9		-650.661	-68.0264	-50.4804	5.73475	0	-0.248236	0	0	-23.2453
44	Complex_1	-21.6242	14.0604	0.931029	-2.2211	-5.51857	-0.00624876	0	-4.29802		-24.5717	1.8949	1.52129	0.931029	0	0.0078237	0	0	-0.5482		-0.0170488	-68.0876	-50.4717	5.73584	0	-0.248231	0	0	-23.3131		0.209588	-7121.33	-8264.03	4003.29	-126.27	-567.378	-23.3211	-21.2699	-1414.17		-708.183	-68.0876	-50.4717	5.73584	0	-0.248231	0	0	-23.3131
45	Complex_1	-21.8407	12.3639	1.27832	-1.72171	-5.56961	-0.249761	0	-5.3482		-22.5936	2.16397	0.779122	1.27832	0	0.000476096	0	0	-0.70095		0.806995	-68.067	-50.4646	5.736	0	-0.248225	0	0	-23.2954		0.205253	-7101.91	-8284.11	4025.2	-124.534	-567.153	-22.8029	-21.7282	-1392.38		-714.404	-68.067	-50.4646	5.736	0	-0.248225	0	0	-23.2954
46	Complex_1	1.00044e-11	1.81899e-12	1.36424e-12	0	0	0	0	1.45519e-11		3.41061e-13	0	0	0	0	0	0	0	0		0	-68.0934	-50.4732	5.73373	0	-0.248235	0	0	-23.3172		0.211524	-7058.97	-8331.42	4049.23	-123	-560.676	-22.3347	-11.4727	-1373.92		-685.369	-68.0934	-50.4732	5.73373	0	-0.248235	0	0	-23.3172
47	Complex_1	-0.072773	2.01643	-0.00136689	0	-3.10766e-06	0	0	-2.08725		-0.000587311	-0.0635879	0.00393172	-0.00136689	0	-3.10766e-06	0	0	-0.0659937		-0.000155931	-68.049	-50.4735	5.73524	0	-0.248242	0	0	-23.2728		0.210348	-7084.67	-8304.48	4018.68	-128.095	-568.699	-24.5348	-18.6879	-1426.5		-632.361	-68.049	-50.4735	5.73524	0	-0.248242	0	0	-23.2728
48	Complex_1	0.00583093	1.7985	-3.34394e-05	0	-8.66977e-06	0	0	-1.79117		-0.0014595	0.00680376	0.00321615	-3.34394e-05	0	-8.66977e-06	0	0	0.0046411		-0.00101138	-67.9149	-49.7738	5.74192	0	-0.248309	0	0	-23.815		0.180348	-7017.83	-8288	4069.18	-123.511	-557.41	-19.1751	-17.3874	-1432.31		-649.214	-67.9149	-49.7738	5.74192	0	-0.248309	0	0	-23.815
49	Complex_1	0.0339984	2.50842	-0.000269803	0	7.88289e-05	0	0	-2.46786		-0.00637831	0.0294983	0.0133754	-0.000269803	0	7.88289e-05	0	0	0.0223016		-0.00598771	-68.0612	-49.7823	5.74238	0	-0.248398	0	0	-23.9586		0.185659	-7162.23	-8312.68	3974.52	-125.422	-561.612	-20.2303	-30.5558	-1448.8		-637.441	-68.0612	-49.7823	5.74238	0	-0.248398	0	0	-23.9586
50	Complex_1	-0.0243212	1.95593	-0.00121204	0	4.50762e-05	0	0	-1.9765		-0.0025824	-0.0155513	0.0105463	-0.00121204	0	4.50762e-05	0	0	-0.0227665		-0.00216422	-67.9797	-49.7766	5.74143	0	-0.248327	0	0	-23.8781		0.181916	-7120.46	-8299.35	3937.54	-127.36	-562.584	-22.1943	-20	-1397.14		-629.371	-67.9797	-49.7766	5.74143	0	-0.248327	0	0	-23.8781
51	Complex_1	0.0279982	2.52042	-0.00115238	0	2.28941e-05	0	0	-2.48718		-0.00410782	0.0244507	0.011924	-0.00115238	0	2.28941e-05	0	0	0.0172157		-0.00355944	-67.9733	-49.7742	5.74172	0	-0.248279	0	0	-23.8733		0.180738	-7058.24	-8256.19	4000.76	-125.067	-553.48	-20.1527	-23.8112	-1425.72		-654.584	-67.9733	-49.7742	5.74172	0	-0.248279	0	0	-23.8733
52	Complex_1	0.0251303	2.10847	0.00136994	0	-2.34841e-05	0	0	-2.08416		-0.000534886	0.0242511	-0.00133174	0.00136994	0	-2.34841e-05	0	0	0.0242415		-5.14633e-06	-67.9997	-49.7843	5.74109	0	-0.24832	0	0	-23.8938		0.185649	-6994.38	-8315.73	3983.42	-125.119	-547.41	-18.8012	-19.7779	-1403.7		-547.257	-67.9997	-49.7843	5.74109	0	-0.24832	0	0	-23.8938
53	Complex_1	0.0327603	2.08255	0.000346359	0	3.32721e-05	0	0	-2.04735		-0.00281872	0.0311165	0.00321913	0.000346359	0	3.32721e-05	0	0	0.0298082		-0.00229043	-68.0015	-49.7906	5.74159	0	-0.248384	0	0	-23.8925		0.188422	-7024.65	-8389.14	3984.32	-133.662	-559.735	-20.9685	-18.7693	-1371.06		-515.64	-68.0015	-49.7906	5.74159	0	-0.248384	0	0	-23.8925
54	Complex_1	-0.0567637	1.69198	0.00166164	0	3.15777e-05	0	0	-1.7498		-0.000638975	-0.056765	-0.000766094	0.00166164	0	3.15777e-05	0	0	-0.0575113		-0.000180777	-67.8161	-49.7739	5.73933	0	-0.248343	0	0	-23.7153		0.182128	-6997.56	-8344.24	4088.25	-129.742	-554.662	-22.5348	-15.4978	-1384		-635.136	-67.8161	-49.7739	5.73933	0	-0.248343	0	0	-23.7153
55	Complex_1	-21.3531	16.9441	1.22817	-2.41628	-5.45276	-0.320221	0	-10.801		-20.5351	2.18484	0.823082	1.22817	0	-0.00430365	0	0	-0.999412		1.1373	-67.9806	-50.4658	5.73389	0	-0.248221	0	0	-23.2085		0.208001	-7101.62	-8365.87	3970.88	-133.168	-570.043	-27.0398	-16.8015	-1367.42		-592.167	-67.9806	-50.4658	5.73389	0	-0.248221	0	0	-23.2085
56	Complex_1	-23.868	16.0228	0.979713	-2.53505	-6.0716	-0.308097	0	-9.88294		-22.0728	2.28044	0.360005	0.979713	0	-0.00311604	0	0	-0.0735562		1.0174	-67.9657	-49.776	5.74073	0	-0.248344	0	0	-23.8647		0.18263	-7026.27	-8331.53	4092.65	-132.263	-565.031	-24.2646	-12.9451	-1395		-657.895	-67.9657	-49.776	5.74073	0	-0.248344	0	0	-23.8647
57	Complex_1	-22.4778	16.0094	0.633335	-2.53192	-5.84574	-0.0974288	0	-9.99673		-20.6487	1.34071	0.405479	0.633335	0	-0.00232483	0	0	-0.107213		0.411432	-67.9722	-49.7751	5.74106	0	-0.248329	0	0	-23.8718		0.181984	-7109.77	-8285.4	3971.15	-130.449	-569.527	-23.6958	-17.6389	-1426.28		-627.933	-67.9722	-49.7751	5.74106	0	-0.248329	0	0	-23.8718
58	Complex_1	-21.0232	17.1037	1.05992	-2.39393	-5.39325	-0.426285	0	-10.5271		-20.4463	2.1772	0.636808	1.05992	0	-0.00403148	0	0	-0.124763		0.60926	-67.9336	-49.7711	5.74145	0	-0.248287	0	0	-23.8358		0.180154	-7035.89	-8300.95	4009.46	-126.767	-558.916	-22.1021	-10.7397	-1398.96		-626.927	-67.9336	-49.7711	5.74145	0	-0.248287	0	0	-23.8358
59	Complex_1	-23.222	15.831	1.33943	-1.87991	-5.66517	-0.672614	0	-10.6291		-21.5457	2.13219	0.173893	1.33943	0	-0.0040188	0	0	-0.520033		1.14292	-67.8834	-49.776	5.73999	0	-0.248324	0	0	-23.782		0.182995	-6993.89	-8265.49	4052.04	-128.662	-570.021	-23.8314	-11.8883	-1426.25		-619.793	-67.8834	-49.776	5.73999	0	-0.248324	0	0	-23.782
60	Complex_1	-21.7116	19.7312	0.183958	-1.75821	-5.10863	-0.638594	0	-13.7414		-20.3799	0.661599	-0.0705832	0.183958	0	-0.00565955	0	0	-0.0212274		0.57511	-68.0426	-50.4783	5.73403	0	-0.248266	0	0	-23.2641		0.214119	-7121.66	-8328	3972.48	-128.246	-557.484	-19.7924	-16.678	-1369.23		-674.709	-68.0426	-50.4783	5.73403	0	-0.248266	0	0	-23.2641
61	Complex_1	-20.4312	18.8323	1.36996	-2.0274	-5.44108	-0.54432	0	-12.5611		-20.0595	2.28951	-1.31505	1.36996	0	-0.00615193	0	0	1.11918		1.12158	-68.0931	-50.4891	5.73695	0	-0.24826	0	0	-23.3074		0.214804	-6956.26	-8286.34	4098.19	-127.101	-569.51	-22.6482	-19.9117	-1414.23		-614.712	-68.0931	-50.4891	5.73695	0	-0.24826	0	0	-23.3074
62	Complex_1	-1.18234e-11	-3.63798e-12	1.36424e-12	0	0	0	0	-9.32232e-12		0	0	0	0	0	0	0	0	0		0	-68.068	-50.4757	5.73501	0	-0.248262	0	0	-23.2922		0.213141	-7119.76	-8312.4	3992.08	-122.51	-557.291	-21.9447	-19.1848	-1400.08		-678.439	-68.068	-50.4757	5.73501	0	-0.248262	0	0	-23.2922
63	Complex_1	0.00011735	0.010605	-2.58638e-07	0	4.51583e-08	0	0	-0.0104787		-8.69456e-06	-5.59093e-06	-3.71799e-05	-2.58639e-07	0	4.51584e-08	0	0	2.42189e-05		7.58353e-06	-68.0507	-50.4727	5.73507	0	-0.248232	0	0	-23.2747		0.209852	-6924.05	-8298.97	4127.51	-126.254	-564.124	-23.0157	-26.7709	-1400.63		-611.79	-68.0507	-50.4727	5.73507	0	-0.248232	0	0	-23.2747
64	Complex_1	-7.27596e-12	-3.63798e-12	4.54747e-13	0	1.13687e-13	0	0	-4.09273e-12		1.36424e-12	0	0	0	0	0	0	0	0		0	-67.8868	-50.4784	5.73416	0	-0.248213	0	0	-23.1068		0.212475	-6987.03	-8301.48	4056.94	-126.39	-568.445	-22.145	-25.4702	-1417.86		-582.173	-67.8868	-50.4784	5.73416	0	-0.248213	0	0	-23.1068
65	Complex_1	3.36513e-11	-1.81899e-12	1.36424e-12	0	0	0	0	2.70575e-11		2.27374e-13	0	0	0	0	0	0	0	0		0	-67.991	-50.487	5.73337	0	-0.248244	0	0	-23.2047		0.21559	-6926.63	-8261.83	4075.85	-121.808	-554.072	-23.8807	-21.6727	-1401.18		-618.036	-67.991	-50.487	5.73337	0	-0.248244	0	0	-23.2047
66	Complex_1	-23.0246	15.8944	0.776994	-2.03169	-5.78797	-0.34913	0	-8.75552		-22.7716	1.57666	0.502009	0.776994	0	-0.00458747	0	0	-0.17394		0.476181	-68.0633	-50.4744	5.73325	0	-0.248226	0	0	-23.2859		0.211997	-7048.64	-8314.62	3979.41	-127.637	-559.764	-23.5426	-22.4843	-1371.54		-608.46	-68.0633	-50.4744	5.73325	0	-0.248226	0	0	-23.2859
67	Complex_1	-19.2417	17.5491	0.247909	-1.66043	-4.53746	-0.163799	0	-10.7881		-19.8889	0.452547	0.33103	0.247909	0	-0.00149146	0	0	-0.292656		0.167755	-67.9857	-50.4682	5.73689	0	-0.248203	0	0	-23.2126		0.206342	-6976.23	-8345.78	4092.81	-128.336	-577.07	-22.8485	-20.5437	-1389.79		-584.668	-67.9857	-50.4682	5.73689	0	-0.248203	0	0	-23.2126
68	Complex_1	-20.234	15.1303	1.02955	-0.81841	-5.31173	-0.246775	0	-8.55997		-21.4569	1.4032	0.283144	1.02955	0	-0.00532149	0	0	-0.526301		0.622133	-66.8591	-51.339	7.0042	0	-0.248238	0	0	-22.3721		0.0960588	-7057.45	-8338.38	4055.95	-126.724	-566.183	-24.2213	-23.8814	-1361.96		-672.054	-66.8591	-51.339	7.0042	0	-0.248238	0	0	-22.3721
69	Complex_1	-23.3739	19.7444	0.356355	-2.25146	-5.67662	-0.424588	0	-13.5664		-21.5556	1.13575	0.0181237	0.356355	0	-0.00518701	0	0	0.0382439		0.728217	-66.9511	-51.6759	7.01632	0	-0.248229	0	0	-22.1358		0.0925888	-7132.2	-8323.65	3963.77	-124.232	-569.158	-22.8342	-22.2691	-1389.82		-644.003	-66.9511	-51.6759	7.01632	0	-0.248229	0	0	-22.1358
70	Complex_1	-22.6408	20.7289	0.251376	-1.89913	-4.94886	-1.26169	0	-14.8295		-20.682	1.02361	-0.4976	0.251376	0	-0.00687505	0	0	0.365208		0.911499	-66.8638	-51.6767	7.01478	0	-0.24825	0	0	-22.0473		0.093578	-7039.36	-8323.17	4066.41	-133.538	-561.155	-24.8435	-19.5309	-1389.5		-654.023	-66.8638	-51.6767	7.01478	0	-0.24825	0	0	-22.0473
71	Complex_1	-23.9574	17.585	0.0750481	-2.15341	-5.27046	-0.0938691	0	-11.5976		-22.5021	0.335121	0.101426	0.0750481	0	-0.0030393	0	0	-0.133451		0.295137	-66.8777	-51.341	7.00429	0	-0.248249	0	0	-22.3895		0.0967632	-6986.35	-8359.48	4080.08	-131.609	-559.578	-22.3673	-26.4297	-1367.95		-599.027	-66.8777	-51.341	7.00429	0	-0.248249	0	0	-22.3895
72	Complex_1	-22.3365	17.1764	0.219608	-1.5185	-5.7705	-0.00201267	0	-10.2532		-22.1883	0.358136	-2.57729e-05	0.219608	0	-0.00196504	0	0	-0.12167		0.262189	-66.8044	-51.3451	7.00551	0	-0.248222	0	0	-22.3127		0.0960991	-7021.35	-8386.66	4006.23	-128.582	-560.445	-22.1287	-20.8872	-1327.4		-581.478	-66.8044	-51.3451	7.00551	0	-0.248222	0	0	-22.3127
73	Complex_1	-17.0273	22.3907	0.392378	-1.30452	-5.01357	-0.118113	0	-13.8087		-19.5654	1.38662	0.53985	0.392378	0	-0.00491855	0	0	-0.0424737		0.501781	-66.9705	-51.6828	7.01362	0	-0.248249	0	0	-22.1505		0.097354	-6996.5	-8368.7	4039.34	-132.89	-564.067	-18.6457	-17.0568	-1351.44		-583.036	-66.9705	-51.6828	7.01362	0	-0.248249	0	0	-22.1505
74	Complex_1	-21.2884	15.0181	0.342288	-1.81885	-5.18809	-0.354733	0	-7.24679		-22.0403	0.79235	0.0056088	0.342288	0	-0.00166792	0	0	0.076883		0.369239	-66.9461	-51.3288	7.00351	0	-0.248228	0	0	-22.4653		0.0927384	-7061.52	-8309.45	3967.98	-126.429	-557.021	-22.2761	-18.5303	-1386.04		-609.745	-66.9461	-51.3288	7.00351	0	-0.248228	0	0	-22.4653
75	Complex_1	-26.416	20.072	0.125158	-2.27569	-5.26547	-1.41786	0	-14.2849		-23.3693	0.120593	0.0412698	0.125158	0	0.000384146	0	0	-0.142682		0.096463	-67.9739	-50.4648	5.73388	0	-0.248205	0	0	-23.2023		0.207519	-7024.72	-8332.52	4027.54	-127.805	-556.628	-24.428	-18.3232	-1368.43		-624.133	-67.9739	-50.4648	5.73388	0	-0.248205	0	0	-23.2023
76	Complex_1	-22.8383	19.7198	0.457007	-1.83823	-5.39754	-0.555453	0	-12.0028		-23.221	1.1466	0.817068	0.457007	0	-0.00389027	0	0	-0.516728		0.393142	-67.93	-50.4766	5.73382	0	-0.248237	0	0	-23.152		0.212928	-6967.94	-8352.13	4104.68	-129.39	-558.72	-19.9299	-12.542	-1400.58		-599.334	-67.93	-50.4766	5.73382	0	-0.248237	0	0	-23.152
77	Complex_1	-22.495	21.1891	0.244357	-2.16564	-5.90412	-1.05118	0	-12.2905		-22.5169	1.00477	-0.555748	0.244357	0	-0.00474274	0	0	0.528151		0.792751	-68.0049	-49.7747	5.74196	0	-0.248323	0	0	-23.9057		0.181909	-6988.87	-8233.04	4057.71	-125.303	-558.761	-22.5117	-15.5866	-1441.99		-649.386	-68.0049	-49.7747	5.74196	0	-0.248323	0	0	-23.9057
78	Complex_1	-22.6873	19.5326	0.218414	-2.04745	-5.46922	-0.673977	0	-12.1118		-22.1359	0.718847	0.00796277	0.218414	0	-0.00531008	0	0	0.0396453		0.458135	-68.0077	-50.482	5.73175	0	-0.248307	0	0	-23.2249		0.215788	-7020.48	-8272.27	3972.55	-124.331	-557.156	-25.2547	-16.5593	-1410.1		-587.364	-68.0077	-50.482	5.73175	0	-0.248307	0	0	-23.2249
79	Complex_1	-19.5485	17.1072	0.897002	-2.47231	-4.62822	-0.524853	0	-11.5188		-18.4086	1.93177	-1.22965	0.897002	0	-0.00641988	0	0	1.19302		1.07781	-68.1691	-50.4723	5.73502	0	-0.24823	0	0	-23.3944		0.210809	-6970.53	-8255.96	4011.5	-127.227	-552.392	-22.2497	-12.3165	-1430.22		-581.654	-68.1691	-50.4723	5.73502	0	-0.24823	0	0	-23.3944
80	Complex_1	-21.0152	16.0309	0.387753	-2.1731	-5.54278	-0.0522699	0	-9.16767		-20.4981	1.20408	0.609762	0.387753	0	0.00193468	0	0	-0.116164		0.3208	-67.9172	-49.7934	5.74269	0	-0.248391	0	0	-23.8063		0.188222	-6914.07	-8307.38	4086.1	-130.367	-549.677	-21.0603	-16.5391	-1382.5		-592.647	-67.9172	-49.7934	5.74269	0	-0.248391	0	0	-23.8063
81	Complex_1	-21.2361	17.9756	0.29004	-1.87978	-4.87157	-0.00588256	0	-10.1458		-22.5987	0.597018	0.631761	0.29004	0	0.00237068	0	0	-0.269714		-0.0574398	-67.841	-49.775	5.74019	0	-0.248332	0	0	-23.7402		0.18234	-7072.62	-8313.81	4048.82	-128.32	-561.471	-23.1584	-16.2535	-1412.23		-666.197	-67.841	-49.775	5.74019	0	-0.248332	0	0	-23.7402
82	Complex_1	-19.3553	16.2861	1.51896	-2.4756	-5.81979	-0.00345096	0	-9.12291		-19.7387	1.9917	0.742231	1.51896	0	-0.00246181	0	0	-1.03859		0.771566	-67.9446	-49.7966	5.74224	0	-0.248375	0	0	-23.8305		0.188618	-7040.22	-8281.85	4029.73	-123.292	-566.805	-24.303	-22.2106	-1407.5		-643.985	-67.9446	-49.7966	5.74224	0	-0.248375	0	0	-23.8305
83	Complex_1	-20.0552	16.0309	0.546562	-2.15594	-5.10288	-0.500222	0	-10.2203		-18.6534	1.38844	0.345035	0.546562	0	-0.00645633	0	0	-0.425138		0.928441	-68.0294	-50.4819	5.73645	0	-0.248262	0	0	-23.2481		0.212377	-7033.19	-8358.15	4045.96	-129.523	-556.647	-22.4266	-18.1779	-1384.07		-610.152	-68.0294	-50.4819	5.73645	0	-0.248262	0	0	-23.2481
84	Complex_1	-21.6675	12.4285	0.636154	-2.73032	-5.91759	-0.00919467	0	-5.83626		-20.2388	1.08873	0.756427	0.636154	0	0.00192481	0	0	-0.680872		0.375092	-68.02	-50.4635	5.73661	0	-0.248195	0	0	-23.2522		0.207331	-7014.83	-8311.51	4045.17	-128.155	-557.531	-23.2017	-13.6816	-1371.13		-654.791	-68.02	-50.4635	5.73661	0	-0.248195	0	0	-23.2522
85	Complex_1	-21.8672	17.3801	0.811957	-2.22021	-5.69495	-0.548173	0	-11.3254		-20.2706	1.65406	0.276306	0.811957	0	-0.00237926	0	0	-0.0573368		0.625516	-68.1183	-50.4845	5.73099	0	-0.248357	0	0	-23.3335		0.217102	-6938.42	-8321.05	4100.66	-126.97	-552.873	-25.469	-16.0301	-1392.51		-604.184	-68.1183	-50.4845	5.73099	0	-0.248357	0	0	-23.3335
86	Complex_1	-23.1626	14.1849	1.32165	-2.52025	-5.52704	-0.00713816	0	-7.09588		-23.5188	2.48535	1.46717	1.32165	0	-0.00159056	0	0	-1.04275		0.740869	-68.0589	-50.4706	5.73685	0	-0.248139	0	0	-23.2849		0.207992	-6965.81	-8333.63	4037.52	-128.257	-558.257	-21.7569	-14.1475	-1369.5		-577.782	-68.0589	-50.4706	5.73685	0	-0.248139	0	0	-23.2849
87	Complex_1	-22.7505	18.9786	0.347618	-1.92257	-5.31394	-0.0763755	0	-11.614		-23.1498	0.954915	0.563721	0.347618	0	0.00154495	0	0	-0.0163647		0.0583964	-67.972	-49.7723	5.74001	0	-0.248355	0	0	-23.8736		0.182204	-7022.36	-8292.98	4063.42	-125.108	-567.543	-22.5567	-16.1873	-1387.57		-673.829	-67.972	-49.7723	5.74001	0	-0.248355	0	0	-23.8736
88	Complex_1	-23.3711	14.6823	0.272015	-1.49994	-5.18148	-0.0695424	0	-8.17161		-23.4029	0.783311	0.847365	0.272015	0	0.000808356	0	0	-0.592381		0.255503	-68.0154	-50.4737	5.73606	0	-0.248232	0	0	-23.2391		0.209466	-7027.32	-8299.54	4015.2	-127.571	-569.279	-26.4784	-17.9618	-1371.36		-630.325	-68.0154	-50.4737	5.73606	0	-0.248232	0	0	-23.2391
89	Complex_1	-20.8202	16.4823	0.169453	-2.08682	-5.00654	-0.00467176	0	-10.3315		-20.0424	0.825751	0.845656	0.169453	0	-0.00117601	0	0	-0.453675		0.265493	-68.085	-50.4882	5.73572	0	-0.248266	0	0	-23.2995		0.215231	-6878.81	-8314.24	4134.47	-125.299	-562.323	-24.3021	-14.4429	-1386.69		-585.981	-68.085	-50.4882	5.73572	0	-0.248266	0	0	-23.2995
90	Complex_1	-22.3648	16.2337	0.38874	-2.41313	-5.60744	-0.0659619	0	-8.37024		-22.5305	1.10088	0.513876	0.38874	0	-0.00170696	0	0	-0.14742		0.347391	-68.0354	-50.4748	5.73426	0	-0.248271	0	0	-23.2584		0.211755	-7067.91	-8303.44	4000.5	-125.132	-562.109	-22.1585	-15.4779	-1421.59		-618.502	-68.0354	-50.4748	5.73426	0	-0.248271	0	0	-23.2584
91	Complex_1	-20.149	16.3063	0.480172	-2.39194	-4.61423	-0.0176426	0	-9.36593		-20.5457	1.58722	0.890821	0.480172	0	-0.000494157	0	0	-0.159444		0.376166	-68.0716	-49.7735	5.74307	0	-0.248342	0	0	-23.9737		0.180919	-7093.83	-8324.48	4059.27	-128.416	-553.533	-19.7429	-13.1723	-1385.1		-728.656	-68.0716	-49.7735	5.74307	0	-0.248342	0	0	-23.9737
92	Complex_1	-23.3257	15.4121	0.372797	-2.06148	-6.12319	-0.00286121	0	-8.24842		-22.6746	0.860771	0.235739	0.372797	0	-0.00173832	0	0	-0.311498		0.565471	-67.8664	-49.7739	5.74023	0	-0.248323	0	0	-23.7654		0.181002	-7096.71	-8305.91	3986.39	-126.718	-563.474	-23.3112	-18.8867	-1373.71		-671.092	-67.8664	-49.7739	5.74023	0	-0.248323	0	0	-23.7654
93	Complex_1	-23.9022	16.2858	1.77678	-2.61984	-6.27649	-0.74445	0	-9.51279		-22.8112	2.99799	0.980343	1.77678	0	0.000546118	0	0	-0.347385		0.587699	-67.977	-50.4837	5.73387	0	-0.248329	0	0	-23.1943		0.215359	-7044.23	-8314.55	3996.29	-124.316	-561.314	-24.8475	-17.4911	-1393.12		-604.881	-67.977	-50.4837	5.73387	0	-0.248329	0	0	-23.1943
94	Complex_1	-21.8521	17.9509	0.850382	-1.86487	-5.64147	-0.0295606	0	-10.8337		-22.2837	1.5663	1.19124	0.850382	0	-0.000273197	0	0	-0.605976		0.130931	-68.0221	-50.4784	5.73486	0	-0.248241	0	0	-23.2431		0.212739	-6934.42	-8318.11	4093.3	-128.739	-562.715	-22.3346	-14.7609	-1376.53		-604.535	-68.0221	-50.4784	5.73486	0	-0.248241	0	0	-23.2431
95	Complex_1	-22.7707	15.4169	0.146144	-2.17222	-5.17954	-0.0420919	0	-8.90546		-22.0344	0.64952	0.209375	0.146144	0	-0.0033738	0	0	-0.039725		0.3371	-67.9615	-49.7728	5.74078	0	-0.248311	0	0	-23.8621		0.180899	-6957.14	-8327.9	4075.93	-132.726	-565.802	-20.6957	-14.8735	-1395.08		-575.998	-67.9615	-49.7728	5.74078	0	-0.248311	0	0	-23.8621
96	Complex_1	-21.8176	17.0087	0.247622	-2.16331	-5.51845	-0.0496133	0	-10.9617		-20.3808	1.22152	0.255505	0.247622	0	-0.00488858	0	0	0.0142881		0.708992	-68.1476	-50.4826	5.7345	0	-0.248313	0	0	-23.3655		0.214398	-7106.74	-8313.14	3994.69	-132.873	-570.454	-21.8135	-14.2327	-1411.65		-637.279	-68.1476	-50.4826	5.7345	0	-0.248313	0	0	-23.3655
97	Complex_1	-21.688	15.2728	0.107583	-1.72769	-4.80727	-0.0477654	0	-8.62336		-21.8624	0.282483	0.20584	0.107583	0	0.000578395	0	0	-0.143754		0.112236	-68.0182	-50.4769	5.73498	0	-0.248224	0	0	-23.2402		0.212122	-7118.69	-8255.85	3992.3	-129.4	-564.822	-22.5873	-12.0799	-1422.86		-703.394	-68.0182	-50.4769	5.73498	0	-0.248224	0	0	-23.2402
98	Complex_1	-23.5131	16.6587	0.563566	-2.26693	-5.75653	-0.0464679	0	-10.0371		-22.6283	1.47973	0.541687	0.563566	0	-0.00350854	0	0	0.00177725		0.376208	-67.8968	-49.8004	5.74349	0	-0.248334	0	0	-23.7804		0.188791	-7010.37	-8344.02	4084.45	-131.586	-573.322	-21.2993	-13.4313	-1387.46		-623.696	-67.8968	-49.8004	5.74349	0	-0.248334	0	0	-23.7804
99	Complex_1	-18.3509	17.2498	1.7466	-2.56014	-5.87956	-0.067553	0	-11.232		-17.608	2.80473	1.00786	1.7466	0	-0.00511385	0	0	-1.12268		1.17806	-67.963	-50.4785	5.73431	0	-0.248256	0	0	-23.1825		0.212013	-7023.46	-8295.92	4042.45	-128.952	-565.854	-19.8035	-13.0461	-1401.59		-640.743	-67.963	-50.4785	5.73431	0	-0.248256	0	0	-23.1825
100	Complex_1	0.0340397	1.07953	-0.000302833	0	-5.00778e-05	0	0	-1.046		0.000869544	0.0320832	-0.00364072	-0.000302833	0	-5.00778e-05	0	0	0.0347331		0.00134369	-68.0745	-50.4758	5.73474	0	-0.248231	0	0	-23.2969		0.211629	-7043.69	-8325.18	4039.14	-124.789	-559.406	-21.1742	-16.0989	-1395.89		-640.295	-68.0745	-50.4758	5.73474	0	-0.248231	0	0	-23.2969
101	Complex_1	0.00201053	1.69543	-8.60735e-05	0	-6.41125e-07	0	0	-1.69351		0.000179135	-0.00317405	-0.00187065	-8.60735e-05	0	-6.41125e-07	0	0	-0.00187449		0.000657801	-67.9929	-50.4782	5.73626	0	-0.248258	0	0	-23.2138		0.211141	-6996.88	-8306.11	4041.31	-124.317	-553.837	-18.987	-15.6602	-1391.64		-627.629	-67.9929	-50.4782	5.73626	0	-0.248258	0	0	-23.2138
102	Complex_1	-0.0151097	1.78079	0.000383547	-2.84217e-14	4.51443e-06	0	0	-1.79669		0.000401958	-0.00800518	-0.0033279	0.000383547	0	4.51443e-06	0	0	-0.00607188		0.00100654	-67.9835	-49.7804	5.74018	0	-0.248387	0	0	-23.8805		0.185689	-7020	-8304.67	4042.57	-122.272	-557.682	-21.9562	-18.9434	-1409.11		-627.95	-67.9835	-49.7804	5.74018	0	-0.248387	0	0	-23.8805
103	Complex_1	-0.0163733	2.06363	0.000875106	0	4.71177e-06	0	0	-2.08033		-0.00055382	-0.017607	-0.00202756	0.000875106	0	4.71177e-06	0	0	-0.0165126		5.32869e-05	-68.0531	-50.4805	5.73338	0	-0.248233	0	0	-23.2722		0.214423	-7085.1	-8302.49	4026.23	-124.505	-551.443	-23.349	-15.4784	-1417.9		-676.166	-68.0531	-50.4805	5.73338	0	-0.248233	0	0	-23.2722
104	Complex_1	0.0418527	1.82526	-0.000980286	0	4.72798e-06	0	0	-1.7834		0.000966358	0.0409709	-0.00270819	-0.000980286	0	4.72798e-06	0	0	0.0431783		0.00147633	-68.1329	-50.4748	5.7353	0	-0.248255	0	0	-23.3564		0.211232	-6951.79	-8299.64	4091.07	-121.673	-549.422	-26.4529	-17.3245	-1404.94		-623.408	-68.1329	-50.4748	5.7353	0	-0.248255	0	0	-23.3564
105	Complex_1	0.00612049	1.358	-3.69608e-05	0	3.18883e-06	0	0	-1.35145		-0.000394835	0.00448859	-0.000159229	-3.69608e-05	0	3.18883e-06	0	0	0.0047076		-2.60083e-05	-68.068	-50.4742	5.73626	0	-0.248171	0	0	-23.2905		0.208672	-7005.41	-8294.57	4086.95	-117.826	-549.255	-25.0217	-18.2782	-1419.96		-667.438	-68.068	-50.4742	5.73626	0	-0.248171	0	0	-23.2905
106	Complex_1	1.00044e-11	1.81899e-12	-4.54747e-13	0	-1.13687e-13	0	0	-1.13687e-12		1.13687e-12	0	0	0	0	0	0	0	0		0	-68.0228	-50.4746	5.73421	0	-0.248228	0	0	-23.2462		0.212054	-7039.35	-8257.55	4043.71	-123.571	-547.31	-27.2151	-19.0917	-1424.44		-683.882	-68.0228	-50.4746	5.73421	0	-0.248228	0	0	-23.2462
107	Complex_1	-0.009841	0.162847	0.000225781	0	-3.12024e-06	0	0	-0.173075		0.000163862	-0.00208543	-0.00069466	0.000225781	0	-3.12024e-06	0	0	-0.00181285		0.000199418	-68.1793	-50.4754	5.73878	0	-0.248108	0	0	-23.4015		0.20691	-6918.22	-8348.4	4127.18	-123.327	-551.257	-24.4724	-19.2843	-1396.89		-581.776	-68.1793	-50.4754	5.73878	0	-0.248108	0	0	-23.4015
108	Complex_1	-1.63709e-11	-3.63798e-12	-4.54747e-13	0	-1.13687e-13	0	0	-1.54614e-11		4.54747e-13	0	0	0	0	0	0	0	0		0	-68.1085	-50.4798	5.73382	0	-0.248298	0	0	-23.3293		0.215	-6975.88	-8322.85	4004.47	-124.471	-548.394	-21.1731	-20.2759	-1390.47		-552.723	-68.1085	-50.4798	5.73382	0	-0.248298	0	0	-23.3293
109	Complex_1	-0.0262546	0.163261	-2.55802e-07	0	2.86725e-06	0	0	-0.189171		-0.000347339	-0.0186454	0.000542766	-2.55801e-07	0	2.86725e-06	0	0	-0.0188613		-0.000329532	-67.9426	-50.4775	5.73392	0	-0.24827	0	0	-23.164		0.213217	-7025.38	-8297.29	3990.02	-121.086	-552.882	-25.3511	-23.214	-1375.49		-620.085	-67.9426	-50.4775	5.73392	0	-0.24827	0	0	-23.164
110	Complex_1	-18.9716	7.48621	1.91776	-2.9996	-6.07779	-0.603742	0	-3.18381		-15.5106	3.87474	-1.46251	1.91776	0	-0.00657906	0	0	1.36432		2.06175	-68.1831	-50.4713	5.73428	0	-0.248211	0	0	-23.4084		0.21045	-6882.23	-8322.98	4081.9	-130.17	-557.736	-22.1524	-18.0223	-1384.76		-528.307	-68.1831	-50.4713	5.73428	0	-0.248211	0	0	-23.4084
111	Complex_1	-20.9465	9.05952	2.04246	-2.6405	-4.94952	-0.162267	0	-3.55424		-20.742	2.36333	-1.27587	2.04246	0	-0.00325085	0	0	1.02777		0.572219	-68.0317	-50.484	5.73303	0	-0.248214	0	0	-23.2469		0.214468	-6921.56	-8277	4076.08	-124.748	-553.637	-21.3604	-17.5353	-1380.44		-622.915	-68.0317	-50.484	5.73303	0	-0.248214	0	0	-23.2469
112	Complex_1	-24.5781	13.8237	1.25044	-2.66292	-5.14081	-0.364211	0	-6.45144		-25.0328	1.71337	-0.692822	1.25044	0	-0.00424022	0	0	0.635433		0.524558	-68.0482	-50.4739	5.73395	0	-0.248234	0	0	-23.2718		0.211799	-6893.61	-8270.87	4115.95	-124.901	-555.749	-22.9639	-19.5587	-1402.25		-613.256	-68.0482	-50.4739	5.73395	0	-0.248234	0	0	-23.2718
113	Complex_1	-23.9646	9.06871	0.204712	-3.15961	-4.9788	-0.0622699	0	-4.10971		-20.9277	0.732733	-0.134937	0.204712	0	-0.000121155	0	0	0.207532		0.455547	-68.1174	-50.4705	5.73385	0	-0.248231	0	0	-23.3434		0.210898	-7037.57	-8269.37	4023.36	-128.397	-555.015	-21.1084	-21.9066	-1408.57		-656.563	-68.1174	-50.4705	5.73385	0	-0.248231	0	0	-23.3434
114	Complex_1	-22.2861	18.6344	1.00798	-3.41174	-5.57314	-0.769835	0	-11.1436		-21.0303	1.5711	0.276882	1.00798	0	-0.00625683	0	0	-0.32722		0.619713	-67.9138	-49.7691	5.73939	0	-0.248311	0	0	-23.8165		0.180631	-6992.49	-8324.43	4062.79	-129.513	-545.954	-20.3175	-11.9903	-1379.69		-643.387	-67.9138	-49.7691	5.73939	0	-0.248311	0	0	-23.8165
115	Complex_1	-24.8109	11.0274	0.493547	-3.26634	-4.35846	-0.696222	0	-5.98459		-22.0262	0.542995	1.16385	0.493547	0	0.00497115	0	0	-0.979076		-0.140296	-66.9709	-51.6726	7.01558	0	-0.248222	0	0	-22.1577		0.0920884	-6960.34	-8296.26	4042.95	-129.754	-552.291	-21.896	-11.1221	-1385.44		-606.525	-66.9709	-51.6726	7.01558	0	-0.248222	0	0	-22.1577
116	Complex_1	-22.3062	10.9131	2.56891	-3.79406	-5.55776	-0.728891	0	-5.25187		-20.4557	2.97428	-1.11528	2.56891	0	-0.00557815	0	0	0.934137		0.5921	-68.1183	-50.4736	5.73378	0	-0.248238	0	0	-23.3424		0.212185	-6975.51	-8256.52	4074.04	-127.329	-553.922	-17.6323	-13.1481	-1427.91		-653.078	-68.1183	-50.4736	5.73378	0	-0.248238	0	0	-23.3424
117	Complex_1	7.27596e-12	1.81899e-12	9.09495e-13	0	0	0	0	5.68434e-12		0	0	0	0	0	0	0	0	0		0	-68.1208	-50.4763	5.73453	0	-0.248233	0	0	-23.343		0.212251	-6856.93	-8291.41	4139.59	-121.444	-547.319	-21.6358	-13.393	-1395.89		-605.419	-68.1208	-50.4763	5.73453	0	-0.248233	0	0	-23.343
118	Complex_1	-25.6457	9.53084	0.195093	-2.92646	-5.7366	-0.740079	0	-4.51643		-21.452	1.36385	0.106137	0.195093	0	-0.00453622	0	0	0.185276		0.881884	-68.0806	-50.4719	5.73456	0	-0.248223	0	0	-23.306		0.211028	-7034.52	-8304.05	3956.11	-133.662	-554.175	-24.705	-15.0838	-1387.73		-571.226	-68.0806	-50.4719	5.73456	0	-0.248223	0	0	-23.306
119	Complex_1	-20.6145	10.9161	2.20433	-3.87385	-4.80893	-1.64283	0	-3.08831		-20.321	2.25026	-1.56723	2.20433	0	-0.00466495	0	0	1.18205		0.43578	-68.0413	-50.4836	5.7322	0	-0.248258	0	0	-23.2591		0.217465	-6943.53	-8253.73	4052.63	-128.538	-557.536	-20.7856	-14.839	-1409.51		-611.218	-68.0413	-50.4836	5.7322	0	-0.248258	0	0	-23.2591
120	Complex_1	-22.7411	7.7022	1.16422	-3.43558	-5.99385	-0.76444	0	-2.7636		-18.6501	2.01361	-0.253488	1.16422	0	-0.00545998	0	0	0.206037		0.902299	-67.9067	-49.7611	5.73781	0	-0.248299	0	0	-23.8156		0.180622	-6964.03	-8251.89	4056.21	-130.279	-556.632	-21.569	-12.2227	-1446.13		-601.507	-67.9067	-49.7611	5.73781	0	-0.248299	0	0	-23.8156
121	Complex_1	-23.1021	23.6419	0.811654	-1.44327	-5.84427	-0.882007	0	-15.2702		-24.1159	1.52344	-0.486171	0.811654	0	-0.00549478	0	0	0.356514		0.846935	-66.8809	-51.3603	7.00736	0	-0.248236	0	0	-22.3821		0.102302	-6969.24	-8298.78	4098.68	-127.359	-562.961	-22.3912	-12.1928	-1427.94		-616.299	-66.8809	-51.3603	7.00736	0	-0.248236	0	0	-22.3821
122	Complex_1	-23.5906	13.8682	0.42203	-1.7653	-5.40501	-0.948712	0	-6.85819		-22.9036	1.5968	0.938164	0.42203	0	-0.00454343	0	0	-0.678723		0.919873	-66.9426	-51.6746	7.01542	0	-0.24823	0	0	-22.1278		0.0926222	-6896.58	-8240.63	4082.34	-126.821	-558.399	-21.1851	-8.36039	-1432.68		-590.845	-66.9426	-51.6746	7.01542	0	-0.24823	0	0	-22.1278
123	Complex_1	-23.4078	13.9013	1.09865	-1.9847	-4.53999	-0.012574	0	-3.92399		-27.9466	1.07066	0.73789	1.09865	0	0.0176363	0	0	-0.621438		-0.162085	-66.899	-51.6825	7.01638	0	-0.248313	0	0	-22.0808		0.0962588	-6991.56	-8267.51	4055.73	-124.509	-556.587	-23.275	-8.7314	-1401.81		-664.882	-66.899	-51.6825	7.01638	0	-0.248313	0	0	-22.0808
124	Complex_1	-24.4617	15.5737	1.29316	-2.90354	-5.69277	-0.66063	0	-9.10467		-22.967	1.76069	-0.0155257	1.29316	0	-0.00328171	0	0	-0.248899		0.735244	-66.7536	-51.3396	7.00417	0	-0.248261	0	0	-22.2664		0.0965874	-7067.74	-8236.65	3995.95	-125.899	-549.81	-22.4642	-13.024	-1440.71		-675.143	-66.7536	-51.3396	7.00417	0	-0.248261	0	0	-22.2664
125	Complex_1	-24.8548	16.1664	1.6024	-2.85214	-5.46055	-1.64145	0	-9.43819		-23.2313	2.36797	1.2569	1.6024	0	0.00824002	0	0	-0.997285		0.497714	-66.9006	-51.3418	7.00322	0	-0.248273	0	0	-22.4124		0.0986158	-6870.85	-8325.57	4106.42	-125.946	-549.936	-22.4539	-19.3011	-1410.18		-523.877	-66.9006	-51.3418	7.00322	0	-0.248273	0	0	-22.4124
126	Complex_1	-24.1604	15.7131	1.26942	-2.50454	-5.88886	-0.68092	0	-8.89221		-23.1764	1.77243	0.0682983	1.26942	0	-0.00285796	0	0	-0.29652		0.734081	-66.8685	-51.3414	7.00399	0	-0.248238	0	0	-22.3807		0.0978709	-6965.68	-8248.41	4073.79	-123.566	-546.256	-18.9006	-17.2301	-1445.01		-640.101	-66.8685	-51.3414	7.00399	0	-0.248238	0	0	-22.3807
127	Complex_1	-24.0173	15.1241	1.60846	-2.64403	-6.23556	-0.730921	0	-7.90818		-23.2312	2.66137	-0.264931	1.60846	0	-0.00432284	0	0	0.17493		1.14723	-66.917	-51.3331	7.00438	0	-0.248233	0	0	-22.4338		0.0937283	-7069.79	-8282.22	3994.13	-125.997	-559.378	-26.4272	-15.5681	-1439.16		-615.167	-66.917	-51.3331	7.00438	0	-0.248233	0	0	-22.4338
128	Complex_1	-21.5072	12.7854	1.83721	-2.59364	-6.25076	-0.791857	0	-6.69528		-19.7983	3.21755	0.012649	1.83721	0	-0.00319931	0	0	0.165724		1.20517	-66.9674	-51.3452	7.00269	0	-0.248241	0	0	-22.4753		0.098705	-6913.61	-8257.39	4093.57	-127.126	-559.767	-23.892	-13.5337	-1412.09		-613.38	-66.9674	-51.3452	7.00269	0	-0.248241	0	0	-22.4753
129	Complex_1	-25.1671	13.5904	1.89827	-2.94514	-5.95878	-1.04108	0	-7.22052		-23.4903	2.39888	0.367917	1.89827	0	0.00142047	0	0	-0.609525		0.740793	-66.8925	-51.3318	7.00179	0	-0.248285	0	0	-22.4149		0.100667	-7008.13	-8261.8	4019.98	-126.146	-559.37	-26.276	-10.5295	-1431.02		-612.977	-66.8925	-51.3318	7.00179	0	-0.248285	0	0	-22.4149
130	Complex_1	-24.8983	14.8916	1.61172	-2.55883	-6.128	-1.55139	0	-6.99505		-24.1684	1.93221	0.7094	1.61172	0	1.64003e-05	0	0	-0.821731		0.432801	-66.723	-51.3361	7.00211	0	-0.248237	0	0	-22.2372		0.0963899	-6931.56	-8242.24	4100.21	-127.037	-552.008	-26.4268	-9.85924	-1426		-648.196	-66.723	-51.3361	7.00211	0	-0.248237	0	0	-22.2372
131	Complex_1	-26.155	19.8932	1.18617	-2.86402	-6.28751	-1.43577	0	-11.9117		-24.7353	1.67677	0.12608	1.18617	0	-0.00406621	0	0	-0.27985		0.648436	-66.8695	-51.3484	7.00655	0	-0.248195	0	0	-22.3765		0.097043	-6944.38	-8262.34	4041.07	-121.403	-550.593	-23.1817	-11.25	-1427.98		-588.691	-66.8695	-51.3484	7.00655	0	-0.248195	0	0	-22.3765
132	Complex_1	0.106524	-0.00920439	-0.00170253	0	-4.08025e-05	0	0	0.114502		0.00297032	0.106524	-0.00920439	-0.00170253	0	-4.08025e-05	0	0	0.114502		0.00297032	-66.9674	-51.6708	7.01789	0	-0.248207	0	0	-22.1559		0.089611	-6932.97	-8299.5	4040.08	-120.61	-550.785	-21.458	-12.9418	-1417.83		-549.928	-66.9674	-51.6708	7.01789	0	-0.248207	0	0	-22.1559
133	Complex_1	4.62579e-05	0.00267127	-2.88449e-07	0	3.52101e-08	0	0	-0.00260786		-1.68979e-05	-1.5575e-06	-1.62593e-06	-2.88449e-07	0	3.52101e-08	0	0	6.14357e-07		-2.92688e-07	-66.861	-51.3346	6.99984	0	-0.248232	0	0	-22.3752		0.0971729	-6912.92	-8275.04	4130.09	-118.054	-547.751	-25.4724	-17.738	-1401.87		-657.078	-66.861	-51.3346	6.99984	0	-0.248232	0	0	-22.3752
134	Complex_1	-1.63709e-11	0	1.81899e-12	0	1.13687e-13	0	0	-1.54614e-11		-3.41061e-13	0	0	0	0	0	0	0	0		0	-66.9709	-51.677	7.01518	0	-0.248235	0	0	-22.1548		0.0938229	-6933.6	-8341.86	4082.04	-122.589	-549.31	-25.9813	-21.8829	-1397.81		-556.201	-66.9709	-51.677	7.01518	0	-0.248235	0	0	-22.1548
135	Complex_1	-2.18279e-11	0	-9.09495e-13	0	1.13687e-13	0	0	-2.4329e-11		2.27374e-13	0	0	0	0	0	0	0	0		0	-66.8604	-51.3353	7.00427	0	-0.248223	0	0	-22.3761		0.0949147	-6999.27	-8298.73	3993.87	-120.117	-551.371	-26.5252	-20.4195	-1395.55		-580.429	-66.8604	-51.3353	7.00427	0	-0.248223	0	0	-22.3761
136	Complex_1	-16.2436	12.692	3.94794	-3.68503	-5.01398	-0.046232	0	-5.48852		-18.6497	5.15125	1.09748	3.94794	0	-0.00401589	0	0	-0.604774		0.714614	-67.0928	-52.7703	6.81708	0	-0.247716	0	0	-21.5389		0.647067	-6984.01	-8220.26	4040.77	-121.754	-553.724	-26.1119	-21.1362	-1421.57		-660.228	-67.0928	-52.7703	6.81708	0	-0.247716	0	0	-21.5389
137	Complex_1	-24.12	9.15354	1.42013	-3.73556	-5.28296	-0.631037	0	-2.83066		-22.2135	1.87528	-0.759968	1.42013	0	-0.00746062	0	0	-0.198219		1.4208	-64.4433	-46.6416	7.95008	0	-0.242691	0	0	-24.1539		-1.3553	-7067.07	-8329.15	4020.07	-127.788	-567.778	-27.0369	-24.7248	-1404.06		-606.605	-64.4433	-46.6416	7.95008	0	-0.242691	0	0	-24.1539
138	Complex_1	-18.3505	15.6293	3.24903	-3.17918	-4.69093	-0.0222198	0	-6.46426		-22.8723	4.70029	1.01203	3.24903	0	-0.00386193	0	0	-0.447059		0.890156	-67.1614	-52.7654	6.81602	0	-0.247716	0	0	-21.6108		0.64649	-6928.35	-8279.75	4103.94	-121.229	-551.457	-21.9783	-13.5242	-1411.73		-632.625	-67.1614	-52.7654	6.81602	0	-0.247716	0	0	-21.6108
139	Complex_1	-17.4794	12.3098	3.2933	-2.99569	-4.55016	-0.0350654	0	-6.02309		-19.4784	4.30652	-0.145063	3.2933	0	-0.0011021	0	0	-0.13736		1.29675	-67.0784	-52.7676	6.81753	0	-0.247668	0	0	-21.5262		0.645414	-6971.93	-8267.81	4059.25	-123.353	-566.012	-25.0398	-15.8637	-1434.81		-598.289	-67.0784	-52.7676	6.81753	0	-0.247668	0	0	-21.5262
140	Complex_1	-19.757	14.8098	0.591565	-3.09856	-4.18599	-0.000507267	0	-6.10043		-21.7728	0.821418	0.315564	0.591565	0	0.00413247	0	0	-0.185772		0.0959285	-67.1752	-52.7628	6.81772	0	-0.247696	0	0	-21.6267		0.644269	-6990.91	-8341.83	4058.75	-133.16	-562.85	-24.7242	-14.4707	-1410.84		-561.789	-67.1752	-52.7628	6.81772	0	-0.247696	0	0	-21.6267
141	Complex_1	-19.4403	14.5706	3.01335	-2.32898	-5.38451	-0.231133	0	-9.96582		-19.1137	4.15276	0.435014	3.01335	0	-0.00424969	0	0	-0.28969		0.998329	-67.0305	-52.7638	6.81626	0	-0.247718	0	0	-21.4808		0.645498	-6909.91	-8284.45	4067.09	-125.682	-552.662	-23.9738	-10.6683	-1423.55		-556.016	-67.0305	-52.7638	6.81626	0	-0.247718	0	0	-21.4808
142	Complex_1	-20.2132	16.5044	1.35275	-1.85992	-5.04279	-0.0181959	0	-10.6022		-20.5472	2.67989	0.0773153	1.35275	0	-0.00295825	0	0	0.331236		0.921546	-67.2834	-52.7601	6.81844	0	-0.247693	0	0	-21.7364		0.642437	-6969.61	-8312.49	4097.19	-124.637	-558.746	-23.5317	-8.86371	-1410.9		-627.638	-67.2834	-52.7601	6.81844	0	-0.247693	0	0	-21.7364
143	Complex_1	-19.2054	15.8761	1.36125	-2.87203	-5.87508	-0.00293756	0	-6.70854		-20.9841	1.84629	0.464195	1.36125	0	-0.00348483	0	0	-0.292932		0.317262	-67.0745	-52.766	6.8168	0	-0.247727	0	0	-21.524		0.646421	-6949.28	-8286.35	4111.52	-127.375	-558.821	-21.1988	-12.2371	-1419.37		-635.443	-67.0745	-52.766	6.8168	0	-0.247727	0	0	-21.524
144	Complex_1	-18.858	15.8745	0.280574	-1.9464	-5.02057	-0.000900606	0	-7.62643		-20.4188	0.7937	0.00135633	0.280574	0	0.000669983	0	0	0.0877151		0.423385	-66.883	-51.6835	6.82407	0	-0.247776	0	0	-22.3931		0.617191	-6899.7	-8322.01	4145.67	-124.558	-546.77	-25.172	-10.0937	-1396.95		-619.817	-66.883	-51.6835	6.82407	0	-0.247776	0	0	-22.3931
145	Complex_1	-20.3314	16.4408	0.168838	-1.49694	-4.07965	-0.0163503	0	-10.0972		-21.2509	0.75771	0.0669461	0.168838	0	-0.00184723	0	0	0.172111		0.351662	-67.1799	-52.7626	6.81757	0	-0.247706	0	0	-21.6318		0.644563	-7014.3	-8343.85	4086.17	-126.27	-558.923	-25.5117	-12.4079	-1405.58		-627.926	-67.1799	-52.7626	6.81757	0	-0.247706	0	0	-21.6318
146	Complex_1	-20.4393	13.209	0.572334	-2.3525	-4.99884	-0.00363797	0	-7.67757		-19.1881	1.79112	-0.298074	0.572334	0	-0.00312064	0	0	0.492729		1.02725	-66.8904	-51.6813	6.82537	0	-0.247769	0	0	-22.4017		0.614975	-6858.2	-8356.23	4152.12	-130.149	-555.219	-26.2264	-12.6236	-1397.36		-532.507	-66.8904	-51.6813	6.82537	0	-0.247769	0	0	-22.4017
147	Complex_1	-22.2279	10.755	0.66442	-2.096	-5.51177	-0.000836979	0	-3.49469		-22.5441	0.878447	0.16929	0.66442	0	0.00347853	0	0	-0.0621038		0.103363	-67.0046	-52.7576	6.8167	0	-0.247846	0	0	-21.4612		0.645436	-7014.11	-8277.67	4054.18	-123.618	-556.047	-20.9698	-14.6468	-1398.91		-676.431	-67.0046	-52.7576	6.8167	0	-0.247846	0	0	-21.4612
148	Complex_1	-17.4505	14.3898	0.946669	-2.22702	-4.4285	-8.22603e-05	0	-7.62766		-18.5037	1.32492	0.0615821	0.946669	0	-0.0022822	0	0	-0.160233		0.479183	-67.0202	-52.7611	6.81696	0	-0.247766	0	0	-21.4726		0.644386	-6943.18	-8341.38	4190.48	-124.766	-557.929	-26.8032	-14.7921	-1396.77		-671.225	-67.0202	-52.7611	6.81696	0	-0.247766	0	0	-21.4726
149	Complex_1	-19.9428	13.676	0.917239	-2.54005	-5.13791	-0.000304529	0	-7.23702		-19.6208	1.68709	0.481256	0.917239	0	-0.00401577	0	0	-0.275555		0.568163	-67.1496	-52.7664	6.81888	0	-0.247704	0	0	-21.599		0.64455	-7028	-8272.18	4049.78	-126.244	-559.471	-24.6013	-10.2649	-1442.47		-642.542	-67.1496	-52.7664	6.81888	0	-0.247704	0	0	-21.599
150	Complex_1	-18.52	16.9466	2.99282	-1.42503	-4.73372	-0.0277229	0	-11.7519		-20.5211	3.82862	0.426665	2.99282	0	0.00194075	0	0	-0.440352		0.847549	-66.965	-52.7664	6.81607	0	-0.247667	0	0	-21.4137		0.646677	-6983.72	-8330.41	4067.17	-124.359	-551.266	-20.663	-9.56685	-1415.64		-598.998	-66.965	-52.7664	6.81607	0	-0.247667	0	0	-21.4137
151	Complex_1	-0.0448272	2.2914	-0.000370311	0	2.18936e-05	0	0	-2.33545		-0.00042566	-0.0376665	0.000758904	-0.000370311	0	2.18936e-05	0	0	-0.0379975		-7.94445e-05	-67.0955	-52.7628	6.81604	0	-0.247741	0	0	-21.5471		0.646095	-7025.79	-8296.01	3990.05	-124.951	-549.843	-24.5827	-15.425	-1412.14		-592.884	-67.0955	-52.7628	6.81604	0	-0.247741	0	0	-21.5471
152	Complex_1	-0.233947	0.748865	-0.00788452	0	0.000103615	0	0	-1.00352		0.0284934	-0.226771	-1.07914	-0.00788452	0	0.000103615	0	0	0.831374		0.0287766	-66.9413	-51.6814	6.82722	0	-0.247719	0	0	-22.4522		0.612828	-6971.33	-8328.94	4033.93	-126.133	-537.492	-24.3434	-11.3021	-1408.44		-568.62	-66.9413	-51.6814	6.82722	0	-0.247719	0	0	-22.4522
153	Complex_1	0.00791926	1.89368	-0.000120343	0	3.90096e-06	0	0	-1.88535		-0.000296886	0.0141081	0.0004109	-0.000120343	0	3.90096e-06	0	0	0.0138578		-4.41515e-05	-67.2575	-52.7649	6.81754	0	-0.247567	0	0	-21.7067		0.644041	-6925.15	-8320.08	4038.33	-126.486	-551.328	-20.0656	-11.1301	-1413.57		-520.816	-67.2575	-52.7649	6.81754	0	-0.247567	0	0	-21.7067
154	Complex_1	0.0174008	0.842027	-0.00102189	0	1.97953e-06	0	0	-0.824211		0.000604605	0.0299606	0.000251151	-0.00102189	0	1.97953e-06	0	0	0.0299461		0.000783275	-67.009	-52.7623	6.81689	0	-0.247735	0	0	-21.4604		0.644565	-6929.79	-8359.72	4079.28	-125.062	-541.5	-19.1237	-12.9175	-1379.81		-570.93	-67.009	-52.7623	6.81689	0	-0.247735	0	0	-21.4604
155	Complex_1	-0.0318775	1.73642	-0.000721603	0	-6.49631e-06	0	0	-1.76845		0.000884339	-0.0150706	-0.000676097	-0.000721603	0	-6.49631e-06	0	0	-0.0148094		0.00114298	-66.9245	-51.6828	6.82532	0	-0.247752	0	0	-22.4346		0.61528	-6942.28	-8353.86	3972.74	-128.706	-536.699	-19.7319	-10.9765	-1394.5		-470.55	-66.9245	-51.6828	6.82532	0	-0.247752	0	0	-22.4346
156	Complex_1	-20.1587	14.9566	1.80861	-2.16829	-5.36027	-0.000180097	0	-9.37392		-20.0213	2.59902	-0.0797504	1.80861	0	-0.00461025	0	0	0.0297161		0.845057	-67.0734	-52.7628	6.82158	0	-0.247717	0	0	-21.5254		0.640896	-6932.94	-8354.63	4127.57	-130.89	-542.578	-21.8859	-21.7529	-1414.17		-574.602	-67.0734	-52.7628	6.82158	0	-0.247717	0	0	-21.5254
157	Complex_1	-17.289	16.6637	0.415177	-1.97588	-4.90087	-0.00362434	0	-8.49747		-18.9901	0.742334	0.0135287	0.415177	0	-0.00143604	0	0	0.0899356		0.225129	-66.9599	-51.6805	6.82638	0	-0.247764	0	0	-22.4717		0.613585	-6942.62	-8264.26	4058.76	-128.53	-546.369	-20.8776	-15.0832	-1425.32		-600.947	-66.9599	-51.6805	6.82638	0	-0.247764	0	0	-22.4717
158	Complex_1	-17.5362	19.5698	3.12955	-2.13243	-5.22688	-0.00701866	0	-13.6434		-19.2258	4.46147	2.06725	3.12955	0	-0.00200417	0	0	-1.55056		0.817229	-67.1422	-52.7653	6.81705	0	-0.24773	0	0	-21.592		0.64584	-6954.93	-8283.43	3987.6	-124.827	-541.152	-21.909	-19.23	-1412.93		-539.055	-67.1422	-52.7653	6.81705	0	-0.24773	0	0	-21.592
159	Complex_1	-18.4998	13.8562	1.20266	-2.30219	-4.73968	-7.60115e-05	0	-7.1994		-19.3174	1.78766	0.0330554	1.20266	0	-0.00259409	0	0	-0.0616771		0.616222	-66.9197	-51.6827	6.82656	0	-0.247773	0	0	-22.4302		0.614339	-6995.16	-8309.35	4025.72	-125.364	-545.862	-20.3219	-12.4726	-1426.83		-580.69	-66.9197	-51.6827	6.82656	0	-0.247773	0	0	-22.4302
160	Complex_1	-18.4031	14.8615	1.8594	-2.58327	-4.84349	-2.63793e-05	0	-7.9337		-19.7635	3.06529	0.0275531	1.8594	0	-0.00196787	0	0	0.279929		0.900384	-67.2491	-52.761	6.81731	0	-0.247709	0	0	-21.7019		0.644264	-6949.34	-8311.52	4074.95	-129.808	-546.091	-23.8453	-20.8368	-1403.76		-588.421	-67.2491	-52.761	6.81731	0	-0.247709	0	0	-21.7019
161	Complex_1	-18.0332	12.4607	1.51346	-2.35439	-4.14052	-9.91393e-06	0	-7.80609		-17.7063	1.95784	-1.18381	1.51346	0	-0.00343	0	0	0.911328		0.720297	-66.9236	-51.6871	6.82596	0	-0.247776	0	0	-22.4319		0.617218	-7008.18	-8336.56	4037.64	-126.792	-558.336	-22.2377	-17.7691	-1382.51		-601.611	-66.9236	-51.6871	6.82596	0	-0.247776	0	0	-22.4319
162	Complex_1	-18.435	13.1355	1.17291	-2.50278	-4.441	-0.000350947	0	-8.38077		-17.4185	1.48566	-0.0668425	1.17291	0	0.000898017	0	0	0.0229196		0.355778	-67.1329	-52.771	6.81636	0	-0.247819	0	0	-21.5794		0.648931	-7000.82	-8375.75	4068.4	-127.906	-561.3	-21.7517	-13.3529	-1383.27		-585.898	-67.1329	-52.771	6.81636	0	-0.247819	0	0	-21.5794
163	Complex_1	-0.00102364	0.174961	0.000172832	0	3.51556e-07	0	0	-0.175633		-0.000524939	0.0074628	0.0008468	0.000172832	0	3.51555e-07	0	0	0.0069328		-0.000489982	-67.1556	-52.7631	6.81825	0	-0.247673	0	0	-21.6058		0.642644	-6996.7	-8336.66	3988.82	-123.872	-553.464	-20.8832	-10.5279	-1385.22		-554.893	-67.1556	-52.7631	6.81825	0	-0.247673	0	0	-21.6058
164	Complex_1	-17.2656	16.4579	1.8131	-2.33357	-4.52313	-8.35892e-05	0	-10.2238		-18.4561	2.67901	-0.100417	1.8131	0	-0.00344905	0	0	0.0927428		0.877036	-67.1161	-52.7654	6.8152	0	-0.247721	0	0	-21.566		0.647792	-6982.26	-8324.4	4099.56	-125.54	-550.557	-19.3078	-16.1885	-1394.02		-651.811	-67.1161	-52.7654	6.8152	0	-0.247721	0	0	-21.566
165	Complex_1	-16.3948	17.1878	2.96762	-1.9261	-4.73791	-0.00115362	0	-13.1112		-16.7738	3.63391	-0.741137	2.96762	0	0.00311154	0	0	0.547687		0.856628	-66.8515	-51.6864	6.82526	0	-0.247763	0	0	-22.3598		0.617107	-7008.46	-8351.41	4049.35	-123.622	-553.516	-19.4688	-8.24189	-1370.89		-630.666	-66.8515	-51.6864	6.82526	0	-0.247763	0	0	-22.3598
166	Complex_1	-16.4004	16.9617	1.99986	-2.29895	-4.66958	-6.298e-05	0	-10.5193		-17.874	2.67663	-0.197518	1.99986	0	-0.00521697	0	0	0.0600905		0.81941	-67.1206	-52.767	6.81676	0	-0.247724	0	0	-21.5695		0.646778	-7108.73	-8348.41	3983.13	-125.484	-562.391	-21.1059	-14.2086	-1383.84		-636.418	-67.1206	-52.767	6.81676	0	-0.247724	0	0	-21.5695
167	Complex_1	-14.9149	20.0954	3.02317	-2.43924	-5.30042	-0.00153668	0	-11.8842		-18.4081	4.23353	1.50336	3.02317	0	-0.00558175	0	0	-0.840779		0.553363	-66.9715	-51.6808	6.82671	0	-0.247747	0	0	-22.4828		0.613114	-7002.31	-8366.42	4074.37	-127.348	-561.088	-21.7728	-12.3158	-1388.66		-599.074	-66.9715	-51.6808	6.82671	0	-0.247747	0	0	-22.4828
168	Complex_1	-24.1436	10.278	-0.380915	-2.07835	-5.20996	-1.27948	0	-10.0007		-15.4723	-1.19983	-5.07264	-0.380915	0	-0.00855276	0	0	2.06041		2.20187	-64.3643	-46.6373	7.95236	0	-0.242656	0	0	-24.0773		-1.35947	-6997.01	-8323.64	3999.67	-127.971	-553.569	-21.5466	-15.6538	-1380.13		-574.167	-64.3643	-46.6373	7.95236	0	-0.242656	0	0	-24.0773
169	Complex_1	-18.5898	15.8823	3.41028	-1.95871	-5.31331	-1.15633	0	-11.6901		-17.7639	4.7653	-0.617698	3.41028	0	-0.00459186	0	0	0.809625		1.16768	-66.9643	-51.6798	6.82598	0	-0.247732	0	0	-22.476		0.613143	-6961.04	-8367.13	4077.02	-125.326	-554.287	-22.19	-11.1366	-1381.28		-576.708	-66.9643	-51.6798	6.82598	0	-0.247732	0	0	-22.476
170	Complex_1	-15.9396	19.9465	3.44418	-2.36938	-4.64869	-1.30161	0	-13.2368		-17.7738	4.96842	0.485365	3.44418	0	-0.00490387	0	0	0.124187		0.919593	-66.9065	-51.6844	6.82571	0	-0.247776	0	0	-22.4159		0.615893	-6958.13	-8369.02	4104.36	-125.394	-559.644	-22.6196	-9.30312	-1347.04		-629.475	-66.9065	-51.6844	6.82571	0	-0.247776	0	0	-22.4159
171	Complex_1	-18.9443	19.5255	0.89456	-1.88603	-5.00237	-0.175291	0	-11.7437		-20.5571	2.00811	-0.250069	0.89456	0	-0.000176016	0	0	0.34305		1.02074	-67.0762	-52.764	6.8138	0	-0.247687	0	0	-21.5257		0.647434	-6923.55	-8333.42	4147.3	-125.075	-562.441	-20.1251	-14.9945	-1365.7		-649.094	-67.0762	-52.764	6.8138	0	-0.247687	0	0	-21.5257
172	Complex_1	-19.0115	18.5187	3.10056	-1.74865	-5.42434	-0.256693	0	-12.6057		-20.5954	4.01454	0.1268	3.10056	0	-0.00684574	0	0	-0.292442		1.08647	-67.0048	-52.7639	6.81713	0	-0.2478	0	0	-21.4551		0.644775	-6894.75	-8411.51	4209.51	-129.958	-556.007	-24.9974	-12.8904	-1350.02		-618.884	-67.0048	-52.7639	6.81713	0	-0.2478	0	0	-21.4551
173	Complex_1	-21.5684	17.1212	3.13253	-2.39935	-6.26495	-0.0047675	0	-11.8423		-21.3108	4.20875	0.490903	3.13253	0	-0.00647255	0	0	-0.351256		0.943048	-67.1321	-52.7621	6.81718	0	-0.247735	0	0	-21.584		0.644503	-6954.04	-8352.78	4154.82	-127.32	-565.296	-18.5413	-16.6287	-1408.13		-620.163	-67.1321	-52.7621	6.81718	0	-0.247735	0	0	-21.584
174	Complex_1	-19.6856	16.927	2.22484	-2.19039	-5.7488	-0.00108325	0	-12.3202		-18.577	3.18253	-0.216292	2.22484	0	-0.0034018	0	0	0.0727312		1.10465	-67.1145	-52.7665	6.81621	0	-0.247707	0	0	-21.5635		0.647072	-7053.27	-8372.29	4108.17	-125.237	-559.571	-23.1344	-19.2634	-1404.84		-657.1	-67.1145	-52.7665	6.81621	0	-0.247707	0	0	-21.5635
175	Complex_1	-20.2222	19.8708	0.949357	-1.9981	-6.03774	-0.00837997	0	-12.8527		-20.1454	2.02104	-0.188581	0.949357	0	2.48452e-06	0	0	0.252019		1.00824	-67.1317	-52.7654	6.81702	0	-0.247722	0	0	-21.5813		0.645746	-7086.54	-8298.66	4032.69	-119.932	-565.812	-23.4292	-16.8915	-1413.78		-680.728	-67.1317	-52.7654	6.81702	0	-0.247722	0	0	-21.5813
176	Complex_1	-17.9258	17.8537	0.584147	-1.72584	-4.1809	-0.000177168	0	-12.0819		-18.3748	1.24155	0.00376402	0.584147	0	-0.00296698	0	0	0.0120332		0.644568	-66.9919	-52.7645	6.81541	0	-0.247719	0	0	-21.4421		0.646975	-7066.52	-8311.95	4020.06	-122.278	-547.576	-23.2381	-20.5184	-1391.47		-669.54	-66.9919	-52.7645	6.81541	0	-0.247719	0	0	-21.4421
177	Complex_1	-19.325	14.0734	0.64266	-2.4198	-5.12851	-8.78904e-05	0	-6.79972		-19.693	0.914182	0.176714	0.64266	0	-0.00192826	0	0	-0.19847		0.295207	-66.955	-51.6801	6.82487	0	-0.247758	0	0	-22.4659		0.613959	-6973.41	-8305.72	4064.44	-122.192	-549.043	-25.8832	-18.6544	-1372.74		-643.62	-66.955	-51.6801	6.82487	0	-0.247758	0	0	-22.4659
178	Complex_1	-18.0836	16.3147	3.20163	-2.38409	-5.50709	-0.171614	0	-8.22453		-21.3125	4.86871	1.32333	3.20163	0	-0.00502729	0	0	-0.599977		0.948759	-67.1243	-52.7656	6.81636	0	-0.247662	0	0	-21.5732		0.645834	-6962.28	-8297.6	4126.33	-123.222	-549.219	-22.5879	-13.3908	-1400.79		-681.801	-67.1243	-52.7656	6.81636	0	-0.247662	0	0	-21.5732
179	Complex_1	0	0	4.54747e-13	0	0	0	0	6.13909e-12		2.27374e-13	0	0	0	0	0	0	0	0		0	-66.8568	-51.68	6.82528	0	-0.247779	0	0	-22.3684		0.614087	-6936.74	-8274.78	4088.92	-118.485	-540.763	-22.4797	-18.857	-1382.19		-668.1	-66.8568	-51.68	6.82528	0	-0.247779	0	0	-22.3684
180	Complex_1	-22.6843	21.6622	1.09704	-1.5742	-6.55654	-0.49321	0	-12.5175		-24.302	2.31544	0.0505359	1.09704	0	-0.00122569	0	0	0.223853		0.945243	-67.1571	-52.7659	6.81588	0	-0.24772	0	0	-21.6062		0.64685	-7022.62	-8260.73	4048.82	-120.136	-549.538	-23.6264	-20.3134	-1406.95		-690.144	-67.1571	-52.7659	6.81588	0	-0.24772	0	0	-21.6062
181	Complex_1	-20.0796	17.6116	1.29662	-1.75206	-5.409	-0.000476143	0	-10.7208		-21.1055	1.99143	-0.1062	1.29662	0	-0.00432532	0	0	0.0674897		0.737836	-66.9983	-52.76	6.81686	0	-0.247764	0	0	-21.4513		0.643934	-6952.14	-8256.28	4049.93	-120.487	-560.454	-24.1226	-13.8226	-1405.78		-621.112	-66.9983	-52.76	6.81686	0	-0.247764	0	0	-21.4513
182	Complex_1	-23.843	21.2291	1.11627	-1.85578	-6.75208	-0.390551	0	-14.8682		-22.3218	2.08689	-0.639954	1.11627	0	-0.00396	0	0	0.373496		1.24103	-66.8263	-51.6758	6.82495	0	-0.247769	0	0	-22.3401		0.612364	-6993.6	-8313.43	4003.08	-123.472	-555.215	-26.0567	-17.3024	-1393.43		-567.778	-66.8263	-51.6758	6.82495	0	-0.247769	0	0	-22.3401
183	Complex_1	-18.72	12.1197	0.520592	-2.04709	-5.20631	-0.0350484	0	-4.86727		-19.2046	1.08348	-0.363668	0.520592	0	0.000858956	0	0	0.246125		0.679573	-66.8995	-51.6784	7.01695	0	-0.248233	0	0	-22.0824		0.0926394	-6920.85	-8299.97	4142.89	-123.124	-555.26	-23.4563	-17.3642	-1389.03		-655.539	-66.8995	-51.6784	7.01695	0	-0.248233	0	0	-22.0824
184	Complex_1	-20.4812	15.2604	1.35677	-1.13013	-5.12318	-0.00593513	0	-9.84951		-20.9896	1.50997	-0.498593	1.35677	0	0.00858457	0	0	0.329526		0.313684	-68.1148	-50.4609	5.73532	0	-0.248183	0	0	-23.3478		0.206697	-6972.25	-8308.11	4105.12	-123.193	-548.76	-22.3352	-9.98642	-1408.76		-656.215	-68.1148	-50.4609	5.73532	0	-0.248183	0	0	-23.3478
185	Complex_1	0.00128656	1.67385	0.000115391	0	3.66683e-06	0	0	-1.67215		-0.000529026	-0.00295552	0.00034728	0.000115391	0	3.66683e-06	0	0	-0.00304895		-0.000372906	-67.9918	-50.4714	5.73529	0	-0.248194	0	0	-23.218		0.21045	-6890.05	-8277.91	4096.38	-114.751	-544.34	-21.2294	-17.9613	-1411.55		-598.686	-67.9918	-50.4714	5.73529	0	-0.248194	0	0	-23.218
186	Complex_1	-0.00133576	0.952325	-3.96039e-05	0	-6.21494e-06	0	0	-0.954497		0.000882223	-0.00216625	-0.00279379	-3.96039e-05	0	-6.21494e-06	0	0	-0.000407307		0.00108067	-67.9923	-50.4825	5.7331	0	-0.2483	0	0	-23.2103		0.215776	-6996.17	-8352.33	4069.68	-121.242	-542.324	-24.6985	-18.0385	-1369.13		-638.085	-67.9923	-50.4825	5.7331	0	-0.2483	0	0	-23.2103
187	Complex_1	-0.0215155	1.29573	-0.000261079	0	7.38373e-09	0	0	-1.31658		-0.000412978	-0.0206435	0.000624066	-0.000261079	0	7.38374e-09	0	0	-0.0208158		-0.000190678	-66.7835	-51.3409	7.00292	0	-0.248242	0	0	-22.2954		0.0981049	-6960.83	-8295.58	4067.12	-118.465	-548.136	-22.3504	-16.9732	-1388.07		-638.374	-66.7835	-51.3409	7.00292	0	-0.248242	0	0	-22.2954
188	Complex_1	-0.0145288	0.180958	0.000122292	0	-3.83034e-06	0	0	-0.196152		0.000545948	-0.0111991	-0.00306697	0.000122292	0	-3.83034e-06	0	0	-0.00887459		0.000624031	-66.8836	-51.3373	7.00356	0	-0.248226	0	0	-22.3972		0.0955277	-7046.87	-8330.14	3969.91	-121.02	-540.041	-19.4259	-18.8778	-1355.86		-631.411	-66.8836	-51.3373	7.00356	0	-0.248226	0	0	-22.3972
189	Complex_1	-22.6324	13.4182	-1.09656	-2.75533	-4.21394	-1.39038	0	-8.03503		-18.5594	-1.00462	0.858748	-1.09656	0	-0.00298703	0	0	-0.966751		0.202926	-66.8615	-51.3541	7.0072	0	-0.248235	0	0	-22.3654		0.0989597	-6957.04	-8279.17	4075.94	-122.928	-543.465	-20.9068	-17.2928	-1404.47		-644.742	-66.8615	-51.3541	7.0072	0	-0.248235	0	0	-22.3654
190	Complex_1	-21.3204	13.328	-0.961413	-2.1155	-4.4705	-1.02716	0	-8.67053		-17.4033	-0.317857	0.947835	-0.961413	0	-0.00719807	0	0	-0.883067		0.585987	-66.8488	-51.343	7.00625	0	-0.248208	0	0	-22.3593		0.0954996	-7043.37	-8277.6	4054.19	-118.458	-551.68	-23.7264	-22.794	-1408.65		-694.651	-66.8488	-51.343	7.00625	0	-0.248208	0	0	-22.3593
191	Complex_1	0.012275	1.34865	-0.00200129	0	-3.57674e-05	0	0	-1.33437		3.34483e-05	0.0155197	0.00625517	-0.00200129	0	-3.57674e-05	0	0	0.0111096		0.000192013	-66.8012	-51.3429	7.00436	0	-0.248226	0	0	-22.3112		0.096757	-6986.72	-8310.35	4111.11	-118.233	-543.777	-26.5318	-26.5057	-1421.43		-651	-66.8012	-51.3429	7.00436	0	-0.248226	0	0	-22.3112
192	Complex_1	-20.1336	19.0746	-0.782359	-1.67266	-5.35911	-0.677457	0	-12.2161		-18.5005	-0.0557827	0.713223	-0.782359	0	-0.00495415	0	0	-0.706044		0.724352	-66.8155	-51.3398	7.00596	0	-0.248256	0	0	-22.3304		0.0969578	-6975.37	-8224.53	4076.89	-116.256	-551.632	-26.5356	-25.3651	-1460.89		-647.051	-66.8155	-51.3398	7.00596	0	-0.248256	0	0	-22.3304
193	Complex_1	5.45697e-12	-3.63798e-12	4.54747e-13	0	-1.13687e-13	0	0	8.86757e-12		5.68434e-13	0	0	0	0	0	0	0	0		0	-66.8167	-51.3365	7.00518	0	-0.24824	0	0	-22.3314		0.0943373	-7077.44	-8258.88	4017.04	-120.608	-548.836	-24.3752	-25.19	-1468.69		-647.899	-66.8167	-51.3365	7.00518	0	-0.24824	0	0	-22.3314
194	Complex_1	1.81899e-12	0	1.81899e-12	0	0	0	0	1.59162e-12		7.95808e-13	0	0	0	0	0	0	0	0		0	-66.9889	-51.3323	7.00567	0	-0.248241	0	0	-22.5073		0.0932415	-7033.76	-8292.06	3986.44	-118.146	-532.771	-24.556	-24.4779	-1428.87		-599.325	-66.9889	-51.3323	7.00567	0	-0.248241	0	0	-22.5073
195	Complex_1	-0.00147346	1.18347	-0.000736137	1.42109e-14	-1.91847e-05	0	0	-1.18317		-0.00101922	-0.00238763	0.00608801	-0.000736137	0	-1.91847e-05	0	0	-0.0068534		-0.000866933	-66.786	-51.3478	7.01512	0	-0.248147	0	0	-22.2997		0.0946014	-6989	-8302.23	4031.91	-118.101	-545.372	-27.5835	-18.4885	-1406.15		-602.988	-66.786	-51.3478	7.01512	0	-0.248147	0	0	-22.2997
196	Complex_1	-0.0131344	0.63537	0.0014805	1.42109e-14	-3.1412e-05	0	0	-0.659111		0.00915839	-0.0120538	-0.0253345	0.0014805	0	-3.1412e-05	0	0	0.00252815		0.00930349	-66.7995	-51.3354	7.00477	0	-0.248256	0	0	-22.315		0.0943111	-7011.36	-8282.12	4029.58	-116.184	-544.502	-25.8193	-16.5499	-1399.3		-656.461	-66.7995	-51.3354	7.00477	0	-0.248256	0	0	-22.315
197	Complex_1	-18.3868	26.6046	1.40181	-0.939036	-5.46769	-1.04785	0	-18.9492		-19.9894	2.59013	-0.0366715	1.40181	0	-0.00256035	0	0	0.156506		1.07104	-66.8634	-51.672	7.00841	0	-0.248382	0	0	-22.0504		0.0989488	-6944.3	-8253.59	4073.84	-118.91	-558.895	-28.4511	-19.7871	-1418.89		-619.621	-66.8634	-51.672	7.00841	0	-0.248382	0	0	-22.0504
198	Complex_1	-20.8098	16.4425	1.95111	-2.42085	-5.02906	-1.38873	0	-10.5127		-19.8521	2.74308	-0.781179	1.95111	0	-0.00421337	0	0	1.00981		0.567554	-68.0338	-50.4817	5.73413	0	-0.248294	0	0	-23.2522		0.214239	-7077.27	-8253.04	3978.27	-121.624	-557.226	-28.9588	-20.1469	-1411.27		-663.28	-68.0338	-50.4817	5.73413	0	-0.248294	0	0	-23.2522
199	Complex_1	-23.4029	16.5627	0.426091	-2.05923	-5.40098	-1.35652	0	-10.2338		-21.3412	1.28415	0.0935899	0.426091	0	-0.00822643	0	0	-0.171995		0.944689	-66.7672	-51.3386	7.00358	0	-0.248256	0	0	-22.2797		0.0957941	-6945.6	-8269.03	4080.13	-120.554	-557.243	-26.5515	-17.5575	-1436.28		-598.507	-66.7672	-51.3386	7.00358	0	-0.248256	0	0	-22.2797
200	Complex_1	-23.7093	14.0347	0.610537	-1.9653	-5.56647	-0.502116	0	-8.45182		-21.8688	1.20192	0.2467	0.610537	0	-0.00265195	0	0	-0.172406		0.519745	-66.899	-51.6741	7.01448	0	-0.248267	0	0	-22.0847		0.0936545	-6977.44	-8301.16	4070.35	-120.656	-554.944	-26.4575	-19.1014	-1402.24		-623.223	-66.899	-51.6741	7.01448	0	-0.248267	0	0	-22.0847
201	Complex_1	-26.2452	13.7712	0.794779	-2.92887	-5.52326	-1.2861	0	-7.76272		-23.3102	1.31964	-0.110144	0.794779	0	-0.0038438	0	0	0.136216		0.502637	-66.9399	-51.6755	7.01526	0	-0.248221	0	0	-22.1246		0.0932002	-6888.13	-8232.19	4112.79	-119.939	-538.38	-25.5729	-21.0494	-1441.61		-622.163	-66.9399	-51.6755	7.01526	0	-0.248221	0	0	-22.1246
202	Complex_1	-21.4604	17.8784	2.07149	-1.73701	-4.96615	-0.118684	0	-10.6649		-23.9236	2.6406	0.246479	2.07149	0	-0.00426274	0	0	-0.23291		0.559806	-67.0353	-52.7697	6.81731	0	-0.247724	0	0	-21.4822		0.646971	-6880.96	-8274.17	4123.3	-119.714	-554.605	-25.4282	-11.5195	-1423.47		-595.352	-67.0353	-52.7697	6.81731	0	-0.247724	0	0	-21.4822
203	Complex_1	-23.0027	19.4985	1.47194	-1.78231	-5.89681	-0.7549	0	-10.2112		-25.3278	2.42144	0.877131	1.47194	0	0.00411073	0	0	-0.294988		0.363239	-66.4629	-52.9583	7.58305	0	-0.251556	0	0	-21.5376		0.70148	-6966.42	-8236.64	4087.35	-123.553	-548.05	-26.5955	-13.5921	-1442.03		-663.309	-66.4629	-52.9583	7.58305	0	-0.251556	0	0	-21.5376
204	Complex_1	-19.3499	15.805	1.29005	-2.87441	-4.34387	-2.40236e-05	0	-4.92154		-24.3051	2.18172	0.170838	1.29005	0	-0.00473692	0	0	-0.20902		0.934596	-67.0107	-52.7628	6.81735	0	-0.247658	0	0	-21.4613		0.643598	-6964.85	-8262.9	4028.38	-120.033	-559.937	-26.1766	-15.524	-1386.27		-622.391	-67.0107	-52.7628	6.81735	0	-0.247658	0	0	-21.4613
205	Complex_1	-19.5162	11.7434	2.68856	-2.70637	-4.5477	-0.0572545	0	-6.14997		-20.4868	3.41233	-0.0498103	2.68856	0	-0.00241483	0	0	-0.294011		1.07001	-67.0812	-52.7649	6.81481	0	-0.247697	0	0	-21.5302		0.646759	-7009.63	-8260.58	4076.27	-121.19	-548.249	-24.7479	-18.0474	-1446.32		-666.76	-67.0812	-52.7649	6.81481	0	-0.247697	0	0	-21.5302
206	Complex_1	-21.6948	13.196	2.55944	-2.2752	-5.25869	-0.587874	0	-4.72326		-24.6052	4.13424	3.73644	2.55944	0	-0.00323471	0	0	-1.90301		-0.255398	-67.0562	-52.7703	6.81566	0	-0.247619	0	0	-21.5019		0.647925	-6928.55	-8269.2	4071.66	-116.659	-547.819	-29.5764	-16.9072	-1414.1		-605.952	-67.0562	-52.7703	6.81566	0	-0.247619	0	0	-21.5019
207	Complex_1	-20.1909	12.9089	1.21505	-1.75399	-4.73246	-0.0794687	0	-6.86902		-20.8799	1.58015	-1.49003	1.21505	0	-0.00172162	0	0	1.70635		0.150512	-67.9942	-49.7719	5.74162	0	-0.248292	0	0	-23.8958		0.180106	-7025.89	-8215.33	4059.69	-115.874	-550.775	-27.7783	-18.2323	-1412.66		-744.942	-67.9942	-49.7719	5.74162	0	-0.248292	0	0	-23.8958
208	Complex_1	0.182184	0.0949211	0.00244398	0	2.68824e-05	0	0	0.0843206		0.000470943	0.190649	-0.00982164	0.00244398	0	2.68824e-05	0	0	0.197481		0.000519477	-67.9974	-49.7792	5.74145	0	-0.248356	0	0	-23.895		0.183698	-6887.72	-8269.99	4103.47	-115.023	-540.658	-26.3106	-19.7356	-1413.32		-606.154	-67.9974	-49.7792	5.74145	0	-0.248356	0	0	-23.895
209	Complex_1	-0.00474434	0.152089	0.000119405	0	1.09924e-05	0	0	-0.156357		-0.000606133	0.00275803	0.00112601	0.000119405	0	1.09924e-05	0	0	0.00208034		-0.000578716	-67.9604	-49.7747	5.7415	0	-0.248339	0	0	-23.8609		0.182071	-6959.02	-8258.26	4073.72	-120.411	-545.418	-27.3639	-19.2638	-1392.64		-669.388	-67.9604	-49.7747	5.7415	0	-0.248339	0	0	-23.8609
210	Complex_1	-23.0414	13.6569	0.405814	-2.22795	-5.18546	-0.62597	0	-6.96382		-22.1009	0.885756	0.524843	0.405814	0	-0.00261693	0	0	-0.403319		0.361034	-67.9954	-50.4765	5.73613	0	-0.248237	0	0	-23.2176		0.21074	-7015.38	-8187.43	4031.53	-117.461	-542.044	-29.0993	-18.3139	-1440.68		-711.875	-67.9954	-50.4765	5.73613	0	-0.248237	0	0	-23.2176
211	Complex_1	-22.2034	16.2821	1.34924	-2.37487	-5.50183	-0.499952	0	-9.72958		-21.7285	2.2108	0.878068	1.34924	0	-0.00227951	0	0	-0.960707		0.946476	-67.9678	-49.7831	5.74318	0	-0.248317	0	0	-23.862		0.182481	-7030.4	-8235.29	4053.86	-121.605	-544.135	-23.3897	-23.5145	-1433.15		-703.174	-67.9678	-49.7831	5.74318	0	-0.248317	0	0	-23.862
212	Complex_1	-22.8675	12.7377	0.51837	-2.22244	-5.45538	-0.212875	0	-7.18709		-21.0458	1.04876	0.579797	0.51837	0	-0.000473103	0	0	-0.412978		0.364047	-67.9853	-50.4806	5.732	0	-0.248297	0	0	-23.2057		0.217296	-6960.98	-8260.26	4130.86	-117.579	-549.771	-26.5052	-20.1895	-1403.51		-714.031	-67.9853	-50.4806	5.732	0	-0.248297	0	0	-23.2057
213	Complex_1	-22.6429	16.7895	0.697703	-1.49251	-5.38916	-0.98398	0	-10.4555		-21.8089	1.4217	-0.3268	0.697703	0	-0.00637678	0	0	0.350236		0.706935	-68.0563	-49.7819	5.74246	0	-0.248323	0	0	-23.9521		0.183642	-6982.16	-8205.91	4018.59	-118.624	-554.06	-27.5094	-20.3292	-1428.08		-646.229	-68.0563	-49.7819	5.74246	0	-0.248323	0	0	-23.9521
214	Complex_1	-22.0681	16.6633	0.153536	-1.92483	-4.98198	-0.806167	0	-10.2673		-20.9047	0.705819	-0.325132	0.153536	0	-0.00631741	0	0	0.207388		0.676345	-67.9162	-49.7745	5.74111	0	-0.248317	0	0	-23.8162		0.181701	-6996.57	-8224.95	4000.42	-116.847	-551.438	-24.8439	-17.6796	-1421.22		-640.006	-67.9162	-49.7745	5.74111	0	-0.248317	0	0	-23.8162
215	Complex_1	-21.0015	17.8779	0.240728	-1.95862	-5.29703	-1.63056	0	-11.0667		-19.1672	1.09509	0.147822	0.240728	0	-0.00782735	0	0	-0.0232733		0.737638	-67.9912	-49.7891	5.74498	0	-0.24824	0	0	-23.882		0.183146	-6937.91	-8206.62	4068.39	-118.697	-558.3	-28.0956	-15.1828	-1407.64		-671.77	-67.9912	-49.7891	5.74498	0	-0.24824	0	0	-23.882
216	Complex_1	-19.3036	23.8349	0.311823	-1.7233	-4.77657	-1.28315	0	-15.0128		-20.6546	0.651859	-0.384881	0.311823	0	-0.00471515	0	0	0.291951		0.437681	-67.9655	-49.7836	5.7393	0	-0.248405	0	0	-23.8596		0.186824	-6948.45	-8235.24	4110.3	-118.326	-552.886	-28.9277	-19.3467	-1403.59		-700.424	-67.9655	-49.7836	5.7393	0	-0.248405	0	0	-23.8596
217	Complex_1	-22.7772	15.5501	0.290635	-2.23822	-5.41765	-0.971012	0	-9.96084		-20.0302	0.602154	-0.20626	0.290635	0	-0.00500334	0	0	-0.032279		0.555061	-67.9325	-50.4676	5.73287	0	-0.248276	0	0	-23.1603		0.210826	-7053.36	-8274.91	3984.56	-118.834	-543.411	-22.9632	-16.1749	-1434.13		-627.501	-67.9325	-50.4676	5.73287	0	-0.248276	0	0	-23.1603
218	Complex_1	-22.8365	17.4473	0.973032	-1.85438	-5.79135	-1.23549	0	-11.5961		-20.7796	1.65118	-0.927295	0.973032	0	-0.00626218	0	0	0.498863		1.11284	-67.8887	-49.7873	5.7419	0	-0.248332	0	0	-23.7799		0.184855	-6931.85	-8246.7	4128.56	-120.563	-554.26	-28.1167	-15.1703	-1425.55		-670.053	-67.8887	-49.7873	5.7419	0	-0.248332	0	0	-23.7799
219	Complex_1	0.0402607	0.762385	0.00391275	0	-2.01023e-05	0	0	-0.734212		0.0081943	0.0430701	-0.0274078	0.00391275	0	-2.01023e-05	0	0	0.0582307		0.00835461	-68.0899	-49.7805	5.74044	0	-0.248327	0	0	-23.9862		0.184707	-7036.41	-8141.11	3990.22	-114.552	-549.608	-29.2677	-12.573	-1487.58		-691.936	-68.0899	-49.7805	5.74044	0	-0.248327	0	0	-23.9862
220	Complex_1	0.00955194	0.822064	-0.000229063	0	7.60174e-06	0	0	-0.811692		-0.00059921	0.0127813	0.00339136	-0.000229063	0	7.60174e-06	0	0	0.0100591		-0.000447644	-68.0752	-50.4729	5.73571	0	-0.248214	0	0	-23.2999		0.210162	-6992.78	-8217.83	4045.87	-112.071	-552.273	-27.6234	-18.2954	-1411.94		-698.606	-68.0752	-50.4729	5.73571	0	-0.248214	0	0	-23.2999
221	Complex_1	-20.2324	16.7603	0.792416	-2.47386	-5.46244	-0.391768	0	-9.13763		-20.3195	1.41477	0.441393	0.792416	0	-0.00307878	0	0	-0.596423		0.780466	-68.0275	-50.4734	5.73248	0	-0.248258	0	0	-23.2504		0.212132	-7013.67	-8223.79	4047.25	-121.178	-553.458	-27.1816	-18.3286	-1461.98		-655.005	-68.0275	-50.4734	5.73248	0	-0.248258	0	0	-23.2504
222	Complex_1	-21.8228	15.7994	0.859251	-2.31157	-5.37068	-0.316989	0	-9.59366		-20.8885	1.76966	0.88439	0.859251	0	-0.00264108	0	0	-0.308559		0.337218	-67.9618	-49.7742	5.74217	0	-0.248317	0	0	-23.8628		0.181374	-7048.76	-8230.41	4031.86	-120.71	-564.833	-26.3613	-16.1548	-1463.03		-659.121	-67.9618	-49.7742	5.74217	0	-0.248317	0	0	-23.8628
223	Complex_1	-21.6459	15.7064	1.3977	-2.28338	-5.12491	-0.294848	0	-9.98148		-21.0654	1.64448	-1.15701	1.3977	0	-0.00272147	0	0	1.04521		0.361294	-67.9449	-50.4729	5.73688	0	-0.248138	0	0	-23.1687		0.207989	-7140.03	-8228.05	3928.41	-118.237	-549.183	-27.2315	-18.3428	-1426.29		-701.105	-67.9449	-50.4729	5.73688	0	-0.248138	0	0	-23.1687
224	Complex_1	-20.1658	17.985	0.819841	-1.88306	-5.92048	-0.0924298	0	-12.2232		-18.8516	1.46321	-0.49331	0.819841	0	-0.00559251	0	0	0.125299		1.01697	-67.952	-49.7884	5.74572	0	-0.248279	0	0	-23.8446		0.183554	-7070.21	-8233.89	3976.16	-118.074	-551.179	-28.5732	-19.8121	-1412.26		-682.578	-67.952	-49.7884	5.74572	0	-0.248279	0	0	-23.8446
225	Complex_1	-20.4308	15.8103	0.258573	-1.87857	-4.85146	-0.541668	0	-10.2393		-18.9888	0.985824	-0.0367787	0.258573	0	-0.0060897	0	0	0.14299		0.62713	-67.9532	-49.7783	5.74013	0	-0.248383	0	0	-23.851		0.184435	-7076.17	-8222.11	3997.79	-117.978	-549.518	-27.4587	-20.1185	-1458.51		-678.265	-67.9532	-49.7783	5.74013	0	-0.248383	0	0	-23.851
226	Complex_1	-24.1	20.612	0.200848	-1.96907	-5.47761	-1.24356	0	-13.3722		-22.8505	0.839318	0.389633	0.200848	0	-0.00460593	0	0	-0.0297135		0.283156	-68.0551	-49.7709	5.74191	0	-0.248318	0	0	-23.9583		0.180519	-7081.28	-8258.71	4000.19	-123.797	-559.188	-28.135	-21.5983	-1459.96		-630.085	-68.0551	-49.7709	5.74191	0	-0.248318	0	0	-23.9583
227	Complex_1	-20.4011	14.5282	1.59123	-2.24878	-5.99448	-0.200389	0	-8.07551		-20.0014	2.50221	0.140321	1.59123	0	-0.00379778	0	0	0.0951493		0.679313	-67.956	-49.7998	5.74388	0	-0.248376	0	0	-23.8409		0.189175	-7041.1	-8238.26	3999.1	-122.48	-556.548	-27.7318	-22.6961	-1433.51		-638.962	-67.956	-49.7998	5.74388	0	-0.248376	0	0	-23.8409
228	Complex_1	-23.7189	13.3626	0.413985	-2.09983	-5.71489	-0.182712	0	-7.72108		-21.7769	1.00603	0.321672	0.413985	0	-0.00304588	0	0	-0.0240525		0.297475	-67.9803	-49.7753	5.7426	0	-0.248295	0	0	-23.8798		0.180551	-6981.33	-8298.51	4074.21	-122.907	-553.725	-27.7141	-20.3726	-1396		-636.297	-67.9803	-49.7753	5.7426	0	-0.248295	0	0	-23.8798
229	Complex_1	-21.3098	10.2966	0.975851	-1.66801	-4.52251	-1.29146	0	-4.64627		-20.454	1.63249	-0.87546	0.975851	0	-0.00736614	0	0	0.529366		1.0101	-68.1184	-50.4732	5.73601	0	-0.248206	0	0	-23.3432		0.210238	-7009.12	-8254.3	4032.87	-123.438	-550.797	-26.7686	-20.3784	-1408.51		-657.795	-68.1184	-50.4732	5.73601	0	-0.248206	0	0	-23.3432
230	Complex_1	-24.7713	8.96726	2.26411	-3.33951	-5.50823	-1.43225	0	-4.96182		-20.7608	3.02327	-2.38123	2.26411	0	-0.00687016	0	0	1.96267		1.18459	-67.9338	-49.7741	5.74176	0	-0.248355	0	0	-23.8348		0.181608	-7027.74	-8317.74	4050.17	-129.649	-563.285	-28.7451	-21.5141	-1410.58		-606.399	-67.9338	-49.7741	5.74176	0	-0.248355	0	0	-23.8348
231	Complex_1	-24.7279	8.59218	1.5427	-2.85342	-5.07675	-0.644604	0	-4.12243		-22.1656	1.95013	-1.76934	1.5427	0	-0.00753392	0	0	1.58313		0.601174	-67.9706	-49.7811	5.74217	0	-0.248295	0	0	-23.8651		0.181724	-7102.85	-8267.85	4029.18	-124.19	-556.946	-27.5557	-19.331	-1425.19		-710.973	-67.9706	-49.7811	5.74217	0	-0.248295	0	0	-23.8651
232	Complex_1	-24.7331	10.9104	0.321402	-3.17129	-4.37626	-0.285282	0	-5.3981		-22.734	1.08507	0.763733	0.321402	0	-0.00282753	0	0	-0.370095		0.372854	-66.9332	-51.6712	7.0147	0	-0.248269	0	0	-22.1211		0.0926807	-7001.3	-8284.93	4060.33	-121.354	-550.752	-27.9764	-22.153	-1391.1		-663.36	-66.9332	-51.6712	7.0147	0	-0.248269	0	0	-22.1211
233	Complex_1	0.0308932	0.704204	-0.00811482	0	1.5982e-05	0	0	-0.665596		0.00038431	0.0507463	0.339303	-0.00811482	0	1.5982e-05	0	0	-0.28101		0.000551833	-66.9258	-51.6738	7.01511	0	-0.248241	0	0	-22.1115		0.0926651	-6980	-8224.99	4004.31	-116.977	-550.838	-27.079	-17.7913	-1406.14		-640.503	-66.9258	-51.6738	7.01511	0	-0.248241	0	0	-22.1115
234	Complex_1	-23.0717	12.4936	0.679746	-2.01215	-3.82498	-0.116934	0	-4.66266		-25.6283	0.893717	-0.426776	0.679746	0	0.00665166	0	0	0.415523		0.218574	-66.9805	-51.6851	7.02023	0	-0.248168	0	0	-22.1598		0.0923156	-6962.42	-8322.1	4102.54	-125.429	-556.897	-23.7348	-16.9749	-1385.76		-634.069	-66.9805	-51.6851	7.02023	0	-0.248168	0	0	-22.1598
235	Complex_1	-25.3713	11.5885	1.34361	-2.96754	-5.84723	-0.385531	0	-6.94733		-22.1558	2.57512	-0.145855	1.34361	0	-0.00232914	0	0	0.0494693		1.33023	-66.8788	-51.6868	7.01765	0	-0.248203	0	0	-22.0567		0.0952532	-6994.49	-8291.25	4012	-124.802	-552.765	-25.54	-20.9486	-1402.44		-588.747	-66.8788	-51.6868	7.01765	0	-0.248203	0	0	-22.0567
236	Complex_1	-23.9646	12.487	0.554396	-2.54266	-5.2996	-0.0236771	0	-3.53894		-25.6011	1.52706	0.860568	0.554396	0	-0.000897791	0	0	-0.439519		0.552514	-66.8966	-51.6732	7.0172	0	-0.248225	0	0	-22.0832		0.0907929	-7021.6	-8290.45	4060.23	-123.902	-555.785	-26.3252	-13.274	-1390.81		-681.286	-66.8966	-51.6732	7.0172	0	-0.248225	0	0	-22.0832
237	Complex_1	-25.5281	10.9603	0.362927	-2.25867	-5.4727	-0.0125752	0	-3.18157		-25.9258	1.43039	1.01705	0.362927	0	0.000102114	0	0	-0.635228		0.685539	-67.0485	-51.6631	7.01295	0	-0.24826	0	0	-22.2403		0.0902302	-7079.41	-8318.24	4059.56	-123.152	-566.819	-24.9332	-18.6977	-1368.08		-719.051	-67.0485	-51.6631	7.01295	0	-0.24826	0	0	-22.2403
238	Complex_1	0.053553	0.809115	-4.14566e-05	0	-1.02875e-05	0	0	-0.754439		-0.00107112	0.0704674	0.00286211	-4.14566e-05	0	-1.02875e-05	0	0	0.0685345		-0.000877452	-66.8307	-51.6802	7.01564	0	-0.248256	0	0	-22.0128		0.0949228	-6984.99	-8374.26	4069.43	-120.354	-548.399	-22.5678	-18.7789	-1348.44		-621.623	-66.8307	-51.6802	7.01564	0	-0.248256	0	0	-22.0128
239	Complex_1	2.27374e-11	1.81899e-12	-9.09495e-13	0	0	0	0	1.95541e-11		-5.68434e-13	0	0	0	0	0	0	0	0		0	-66.9466	-51.6708	7.00904	0	-0.24833	0	0	-22.1323		0.095747	-6982.96	-8332.7	4106.52	-123.361	-551.001	-26.488	-17.509	-1372.65		-665.773	-66.9466	-51.6708	7.00904	0	-0.24833	0	0	-22.1323
240	Complex_1	9.09495e-12	7.27596e-12	-4.54747e-13	0	1.13687e-13	0	0	5.00222e-12		1.13687e-13	0	0	0	0	0	0	0	0		0	-68.117	-50.4753	5.73634	0	-0.248135	0	0	-23.3406		0.210671	-6968.64	-8284.17	4094.44	-119.588	-546.932	-24.8833	-14.4136	-1405.45		-667.64	-68.117	-50.4753	5.73634	0	-0.248135	0	0	-23.3406
241	Complex_1	-0.167323	1.00549	0.00245799	0	1.34821e-05	0	0	-1.17384		-0.00144576	-0.160173	0.000647696	0.00245799	0	1.34821e-05	0	0	-0.161994		-0.00129819	-66.8334	-51.6748	7.01361	0	-0.24825	0	0	-22.018		0.0940605	-7039.34	-8325.19	4017.54	-120.327	-556.383	-26.5745	-11.2053	-1378.66		-638.529	-66.8334	-51.6748	7.01361	0	-0.24825	0	0	-22.018
242	Complex_1	-0.0203283	0.356859	-4.54335e-05	0	-4.1148e-06	0	0	-0.376896		-0.000241678	-0.0180114	0.000947927	-4.54335e-05	0	-4.1148e-06	0	0	-0.0187301		-0.000179728	-67.8578	-49.7766	5.74139	0	-0.248351	0	0	-23.7573		0.182953	-7097.18	-8267.04	4018.43	-119.514	-554.367	-26.3573	-15.0697	-1408.94		-724.321	-67.8578	-49.7766	5.74139	0	-0.248351	0	0	-23.7573
243	Complex_1	0.0208341	1.00246	-0.000345612	0	3.09171e-06	0	0	-0.981046		-0.000238907	0.0192445	0.00085555	-0.000345612	0	3.09171e-06	0	0	0.0187954		-6.39319e-05	-68.0454	-49.7748	5.74172	0	-0.248323	0	0	-23.9461		0.18206	-7034.46	-8345.89	4056.21	-119.018	-553.151	-25.4144	-13.6809	-1379.09		-654.419	-68.0454	-49.7748	5.74172	0	-0.248323	0	0	-23.9461
244	Complex_1	-0.006512	0.997082	0.000156943	0	-7.55614e-06	0	0	-1.00288		-0.000862478	-0.00608233	0.00205046	0.000156943	0	-7.55614e-06	0	0	-0.00756571		-0.000716458	-67.9656	-49.7721	5.73987	0	-0.248311	0	0	-23.8678		0.182706	-6971.59	-8307.97	4068.38	-120.256	-537.78	-25.6891	-13.2297	-1374.18		-660.863	-67.9656	-49.7721	5.73987	0	-0.248311	0	0	-23.8678
245	Complex_1	-0.0240303	0.97395	-0.000877891	0	-4.37223e-06	0	0	-0.9976		0.000501248	-0.0225446	0.00100653	-0.000877891	0	-4.37223e-06	0	0	-0.0233114		0.000642505	-67.8931	-49.7754	5.74182	0	-0.248309	0	0	-23.7932		0.181968	-6900.09	-8268.32	4116.67	-120.59	-543.317	-30.8271	-16.1296	-1381.96		-655.619	-67.8931	-49.7754	5.74182	0	-0.248309	0	0	-23.7932
246	Complex_1	0.00843075	1.00156	0.00017607	0	7.08323e-06	0	0	-0.991942		-0.00137507	0.00843844	0.00255667	0.00017607	0	7.08322e-06	0	0	0.00688014		-0.00118153	-68.056	-49.763	5.74135	0	-0.248272	0	0	-23.9622		0.176105	-7047.22	-8245.13	3959.11	-115.505	-548.489	-26.5876	-8.4797	-1387.37		-674.77	-68.056	-49.763	5.74135	0	-0.248272	0	0	-23.9622
247	Complex_1	-0.00916897	1.06401	0.000607651	0	-4.76392e-06	0	0	-1.07299		-0.000799142	-0.00833511	-1.64182e-05	0.000607651	0	-4.76392e-06	0	0	-0.00833302		-0.000588554	-66.8376	-51.6754	7.0148	0	-0.248251	0	0	-22.0226		0.0939109	-6914.67	-8356.55	4061.43	-119.795	-549.855	-24.7702	-10.1846	-1366.94		-548.003	-66.8376	-51.6754	7.0148	0	-0.248251	0	0	-22.0226
248	Complex_1	0.00146048	1.14014	-5.93385e-05	0	-2.84933e-07	0	0	-1.13847		-0.00014777	-0.00397762	-0.000145385	-5.93385e-05	0	-2.84933e-07	0	0	-0.00385826		8.56486e-05	-67.9286	-49.7715	5.74172	0	-0.248294	0	0	-23.831		0.180436	-6973.24	-8314.19	4037.71	-116.896	-547.999	-24.957	-9.92546	-1368.56		-628.42	-67.9286	-49.7715	5.74172	0	-0.248294	0	0	-23.831
249	Complex_1	-23.1907	9.35447	0.538452	-3.128	-4.6287	-1.65688	0	-3.39996		-20.27	1.14419	1.30444	0.538452	0	0.00259382	0	0	-1.0149		0.31361	-66.9126	-51.6846	7.0183	0	-0.248275	0	0	-22.0937		0.0957279	-6970.5	-8366.05	4036.56	-126.071	-547.628	-27.1084	-15.3737	-1327.58		-597.248	-66.9126	-51.6846	7.0183	0	-0.248275	0	0	-22.0937
250	Complex_1	-25.2019	5.05949	1.01047	-3.0454	-5.42008	-0.0199778	0	-1.60137		-21.185	2.28731	0.971267	1.01047	0	0.0164097	0	0	-0.596084		0.885247	-65.3036	-52.8444	8.39858	0	-0.251535	0	0	-21.2508		0.644594	-6951.64	-8327.82	4041.76	-121.6	-550.337	-30.535	-8.88553	-1378.92		-575.299	-65.3036	-52.8444	8.39858	0	-0.251535	0	0	-21.2508
251	Complex_1	-21.8186	0.0477412	3.37441	-3.89586	-4.87825	-0.00434353	0	3.34628		-19.8086	5.07054	-0.825571	3.37441	0	0.0460401	0	0	1.7534		0.722262	-66.6433	-51.0931	7.14534	0	-0.251923	0	0	-23.1843		0.740601	-6911.98	-8311.54	4150.48	-125.676	-548.209	-29.8884	-11.4471	-1385.04		-650.656	-66.6433	-51.0931	7.14534	0	-0.251923	0	0	-23.1843
252	Complex_1	-24.1217	9.81678	1.57235	-3.38872	-4.99744	-1.03281	0	-2.79396		-23.2979	2.63426	1.36806	1.57235	0	0.0109394	0	0	-0.528671		0.211585	-68.0286	-50.4799	5.73554	0	-0.248277	0	0	-23.2471		0.211102	-6953.23	-8311.22	4100.06	-124.695	-556.889	-30.6559	-12.811	-1401.37		-615.649	-68.0286	-50.4799	5.73554	0	-0.248277	0	0	-23.2471
253	Complex_1	0.00175637	1.33395	0.000325094	0	-5.96723e-07	0	0	-1.33209		-0.00042687	0.00118565	0.000266735	0.000325094	0	-5.96723e-07	0	0	0.000851526		-0.000257111	-68.0834	-49.7735	5.74271	0	-0.24832	0	0	-23.9847		0.180397	-7084.89	-8325.01	4001.31	-121.478	-546.881	-26.4634	-11.5677	-1369.7		-685.093	-68.0834	-49.7735	5.74271	0	-0.24832	0	0	-23.9847
254	Complex_1	-0.00292126	0.934778	-5.56517e-05	1.42109e-14	-1.10981e-06	0	0	-0.936861		-0.000781682	0.000838689	0.00201137	-5.56517e-05	0	-1.10981e-06	0	0	-0.000452305		-0.000663613	-68.0106	-49.7644	5.74528	0	-0.248369	0	0	-23.9207		0.177555	-6951.07	-8268.49	4080.56	-115.134	-548.642	-26.4223	-9.93561	-1422.88		-640.132	-68.0106	-49.7644	5.74528	0	-0.248369	0	0	-23.9207
255	Complex_1	-0.00421406	0.971071	0.000241658	0	-6.41713e-07	0	0	-0.974865		-0.000660632	-0.00143963	0.00101597	0.000241658	0	-6.41713e-07	0	0	-0.00220254		-0.000494082	-66.7886	-51.674	7.00065	0	-0.248435	0	0	-21.9718		0.105012	-6941.26	-8278.16	4040.95	-120.504	-541.601	-28.4943	-9.64478	-1384.42		-619.377	-66.7886	-51.674	7.00065	0	-0.248435	0	0	-21.9718
256	Complex_1	-0.0260818	0.961904	-0.000315483	0	1.40109e-07	0	0	-0.988964		0.00129373	-0.0235504	-0.00268995	-0.000315483	0	1.40109e-07	0	0	-0.0219858		0.00144071	-66.9057	-51.3372	7.00371	0	-0.248237	0	0	-22.4194		0.0954492	-6961.34	-8283.08	4033.27	-122.851	-552.613	-28.0388	-8.12478	-1383.94		-615.96	-66.9057	-51.3372	7.00371	0	-0.248237	0	0	-22.4194
257	Complex_1	0.0274082	0.961729	-0.00014035	0	-1.45863e-05	0	0	-0.934483		0.000316611	0.0256774	-0.000840787	-0.00014035	0	-1.45863e-05	0	0	0.0262091		0.000463998	-66.8858	-51.6879	7.01231	0	-0.24832	0	0	-22.0624		0.100448	-6980.3	-8308.37	4048.75	-122.053	-553.572	-27.8573	-12.0928	-1386.67		-618.431	-66.8858	-51.6879	7.01231	0	-0.24832	0	0	-22.0624
258	Complex_1	0.0970926	0.924209	0.00264654	0	1.2331e-05	0	0	-0.826934		-0.00284069	0.101615	0.00356195	0.00264654	0	1.2331e-05	0	0	0.0980876		-0.0026937	-66.9202	-51.6796	7.01367	0	-0.248275	0	0	-22.1022		0.0961922	-6957.13	-8282.12	4004.16	-125.808	-548.791	-26.0509	-10.9187	-1367.53		-600.072	-66.9202	-51.6796	7.01367	0	-0.248275	0	0	-22.1022
259	Complex_1	-0.0324605	1.30561	0.00046051	0	2.26288e-05	0	0	-1.3357		-0.00284783	-0.0284558	0.00514831	0.00046051	0	2.26288e-05	0	0	-0.0314018		-0.00268549	-67.9778	-49.7738	5.74231	0	-0.248318	0	0	-23.8792		0.181196	-6995.36	-8274.15	4008.19	-125.554	-552.157	-29.0781	-11.5087	-1419.11		-591.978	-67.9778	-49.7738	5.74231	0	-0.248318	0	0	-23.8792
260	Complex_1	0.0194687	0.957529	-0.000454315	0	-1.01908e-05	0	0	-0.937389		-0.000206872	0.0210245	0.00153472	-0.000454315	0	-1.01908e-05	0	0	0.0200246		-7.03234e-05	-67.8708	-49.7754	5.74069	0	-0.248317	0	0	-23.77		0.182222	-6938.6	-8334.71	4045.86	-128.842	-548.393	-26.4092	-10.1425	-1404.59		-531.376	-67.8708	-49.7754	5.74069	0	-0.248317	0	0	-23.77
261	Complex_1	-0.0160935	0.292989	-6.71348e-05	0	-2.51351e-06	0	0	-0.308413		-0.000599424	-0.0116086	0.00182807	-6.71348e-05	0	-2.51351e-06	0	0	-0.012863		-0.000504069	-67.9983	-49.7394	5.73645	0	-0.248348	0	0	-23.9207		0.173629	-7065.18	-8301.81	4030.53	-122.234	-560.167	-28.5182	-9.54465	-1428.47		-644.959	-67.9983	-49.7394	5.73645	0	-0.248348	0	0	-23.9207
262	Complex_1	-0.00668454	0.712432	-0.000337684	0	1.58503e-06	0	0	-0.718653		-0.00012755	-0.00800517	0.000236948	-0.000337684	0	1.58503e-06	0	0	-0.00792882		2.28053e-05	-67.9434	-49.7762	5.74145	0	-0.248319	0	0	-23.8428		0.182437	-7017.99	-8318.93	4008.28	-119.304	-552.608	-28.2104	-10.1653	-1396.83		-600.221	-67.9434	-49.7762	5.74145	0	-0.248319	0	0	-23.8428
263	Complex_1	0.00261005	0.656506	-3.91766e-05	0	-5.40943e-07	0	0	-0.653722		-0.000133701	7.46718e-05	5.38225e-05	-3.91766e-05	0	-5.40943e-07	0	0	4.71393e-05		1.34275e-05	-68.0478	-50.4781	5.73435	0	-0.248217	0	0	-23.2685		0.212686	-6987.72	-8322.1	4015.79	-124.426	-549.241	-29.4399	-6.8797	-1362.54		-608.888	-68.0478	-50.4781	5.73435	0	-0.248217	0	0	-23.2685
264	Complex_1	-0.000481343	-0.0061252	7.58936e-06	0	-6.05994e-07	0	0	0.00571784		-8.0959e-05	3.00594e-07	6.13873e-05	7.58936e-06	0	-6.05994e-07	0	0	-5.93546e-05		-8.7154e-06	-68.1039	-50.4724	5.73437	0	-0.24823	0	0	-23.3285		0.210808	-7014.9	-8301.18	4003.6	-121.681	-552.206	-30.5829	-13.9376	-1389.91		-609.008	-68.1039	-50.4724	5.73437	0	-0.24823	0	0	-23.3285
265	Complex_1	0.00774069	0.650729	-8.01708e-05	0	-2.35454e-06	0	0	-0.642687		-0.000219396	0.00650385	0.000196075	-8.01708e-05	0	-2.35454e-06	0	0	0.00643523		-4.493e-05	-67.9795	-50.4756	5.7332	0	-0.248267	0	0	-23.2019		0.213062	-6943.75	-8302.1	4039.28	-121.218	-546.752	-26.9813	-10.3783	-1377.21		-598.4	-67.9795	-50.4756	5.7332	0	-0.248267	0	0	-23.2019
266	Complex_1	0.0046269	0.746948	-1.88852e-05	0	-4.03379e-07	0	0	-0.742152		-0.000150089	2.89813e-05	-0.000112994	-1.88852e-05	0	-4.03379e-07	0	0	0.000117734		4.35299e-05	-68.0686	-49.7857	5.74257	0	-0.248465	0	0	-23.9639		0.186877	-6987.91	-8332.78	4052.65	-118.926	-548.18	-25.4828	-14.2689	-1372.05		-628.879	-68.0686	-49.7857	5.74257	0	-0.248465	0	0	-23.9639
267	Complex_1	-0.00175654	0.725997	-1.86497e-05	0	1.02162e-06	0	0	-0.727243		-0.000492818	-0.00476533	0.000915778	-1.86497e-05	0	1.02162e-06	0	0	-0.00533506		-0.000328424	-68.0773	-49.7703	5.74133	0	-0.248323	0	0	-23.9809		0.180926	-7006.64	-8294.12	3994.29	-119.24	-544.374	-26.9444	-21.1281	-1413.24		-581.898	-68.0773	-49.7703	5.74133	0	-0.248323	0	0	-23.9809
268	Complex_1	0.00221392	0.65074	-3.93563e-05	0	-2.63446e-06	0	0	-0.648508		2.40773e-05	-0.000186934	-0.000107346	-3.93563e-05	0	-2.63446e-06	0	0	-0.000196229		0.000158632	-68.003	-49.7723	5.74176	0	-0.248307	0	0	-23.9045		0.180384	-6976.74	-8315.32	4040.93	-118.887	-549.875	-29.9411	-14.9352	-1391.82		-596.893	-68.003	-49.7723	5.74176	0	-0.248307	0	0	-23.9045
269	Complex_1	-0.0264248	0.276206	0.000144506	0	9.62869e-06	0	0	-0.302863		7.76271e-05	-0.0213713	0.000702604	0.000144506	0	9.62869e-06	0	0	-0.0224141		0.000186081	-67.9472	-49.7651	5.74176	0	-0.24825	0	0	-23.8521		0.176417	-7018.72	-8293.38	4062.43	-121.145	-557.252	-26.8322	-13.5692	-1424.35		-644.626	-67.9472	-49.7651	5.74176	0	-0.24825	0	0	-23.8521
270	Complex_1	0.00329	0.705207	-0.000145859	0	5.6155e-06	0	0	-0.701318		-0.000458178	0.000746189	0.00096529	-0.000145859	0	5.6155e-06	0	0	0.000242094		-0.000320952	-68.0751	-49.7719	5.74236	0	-0.248333	0	0	-23.9777		0.180387	-6966.41	-8299.28	4064.62	-120.639	-547.772	-28.2649	-16.8393	-1418.57		-599.668	-68.0751	-49.7719	5.74236	0	-0.248333	0	0	-23.9777
271	Complex_1	-0.0123851	0.250358	-0.000291002	0	-2.37719e-06	0	0	-0.261946		-0.000504343	-0.00552067	0.00194351	-0.000291002	0	-2.37719e-06	0	0	-0.00677362		-0.000397181	-67.9639	-49.7743	5.74244	0	-0.248324	0	0	-23.8647		0.181004	-6968.01	-8270.8	4053.05	-121.965	-536.835	-26.4345	-12.8955	-1410.69		-641.45	-67.9639	-49.7743	5.74244	0	-0.248324	0	0	-23.8647
272	Complex_1	-24.5698	4.97426	0.324473	-2.97829	-5.1654	-0.00493091	0	0.931169		-22.6511	0.829314	0.114971	0.324473	0	-0.00177373	0	0	0.0541974		0.337446	-68.0799	-49.7785	5.73949	0	-0.248408	0	0	-23.9794		0.186857	-7073.2	-8264.35	4012.46	-123.284	-559.927	-27.9909	-20.2628	-1420.84		-669.011	-68.0799	-49.7785	5.73949	0	-0.248408	0	0	-23.9794
273	Complex_1	-21.3951	9.37382	1.48721	-3.33605	-5.29258	-0.338177	0	-2.34337		-20.9459	2.4645	1.73002	1.48721	0	-0.00511817	0	0	-1.2725		0.524893	-68.0665	-50.476	5.73418	0	-0.248242	0	0	-23.2882		0.211674	-7062.15	-8317.58	4028.31	-124.551	-551.265	-27.2549	-21.6741	-1388.79		-659.342	-68.0665	-50.476	5.73418	0	-0.248242	0	0	-23.2882
274	Complex_1	-22.8069	9.62288	0.526924	-2.43412	-5.70356	-0.000497292	0	-1.25512		-23.5634	1.27623	0.0356673	0.526924	0	-0.00524896	0	0	-0.0435489		0.762436	-68.0977	-50.4732	5.7342	0	-0.24832	0	0	-23.3228		0.212495	-7045.51	-8290.45	4039.78	-125.281	-556.949	-29.7041	-20.8737	-1404.32		-657.708	-68.0977	-50.4732	5.7342	0	-0.24832	0	0	-23.3228
275	Complex_1	-22.1932	9.36164	0.183359	-2.80009	-5.19482	-0.00304415	0	-2.47891		-21.2614	0.761321	-0.272204	0.183359	0	-0.00488673	0	0	0.231242		0.62381	-67.9997	-50.4765	5.73378	0	-0.24823	0	0	-23.2208		0.212134	-7007.75	-8298.91	4062.92	-124.688	-564.373	-31.3619	-16.3241	-1396.03		-638.988	-67.9997	-50.4765	5.73378	0	-0.24823	0	0	-23.2208
276	Complex_1	-22.712	7.86317	0.129829	-3.20205	-4.60193	-0.000249015	0	0.494557		-23.3954	0.707676	0.570065	0.129829	0	0.00300658	0	0	-0.0403849		0.0451598	-68.0987	-50.4735	5.73418	0	-0.248237	0	0	-23.3231		0.21197	-6964.64	-8308.54	4086.19	-127.728	-564.646	-26.9505	-19.0899	-1379.45		-624.428	-68.0987	-50.4735	5.73418	0	-0.248237	0	0	-23.3231
277	Complex_1	-24.8037	7.35615	1.32658	-3.10343	-5.04969	-0.235474	0	-1.24802		-23.8498	2.06943	-1.12699	1.32658	0	-0.00537232	0	0	1.29956		0.575649	-67.8533	-49.7774	5.74177	0	-0.248325	0	0	-23.7516		0.182299	-7052.53	-8323.07	3935.99	-129.361	-557.016	-27.9009	-19.8722	-1382.61		-548.695	-67.8533	-49.7774	5.74177	0	-0.248325	0	0	-23.7516
278	Complex_1	-26.471	5.70362	1.02336	-3.1433	-6.18881	-0.514138	0	-0.032501		-23.3192	2.4524	0.731744	1.02336	0	-0.00377775	0	0	-0.0705869		0.771669	-68.033	-50.4752	5.73502	0	-0.248229	0	0	-23.2555		0.210981	-7020.31	-8272.85	4039.08	-126.921	-559.967	-27.0193	-16.6952	-1411.23		-644.709	-68.033	-50.4752	5.73502	0	-0.248229	0	0	-23.2555
279	Complex_1	-22.4281	10.8019	0.9426	-2.9232	-5.33703	-0.0680084	0	-4.24202		-21.6023	2.08807	-0.631809	0.9426	0	-0.0046884	0	0	0.563205		1.21876	-68.1367	-49.7709	5.74279	0	-0.248323	0	0	-24.04		0.179794	-6900.72	-8267.91	4076.84	-121.823	-546.845	-28.3096	-17.5512	-1411.07		-584.054	-68.1367	-49.7709	5.74279	0	-0.248323	0	0	-24.04
280	Complex_1	-19.6467	8.84427	1.07983	-2.48417	-5.01008	-0.0007884	0	-2.05192		-20.0238	2.1671	-1.30325	1.07983	0	-0.00779521	0	0	0.739268		1.65904	-66.9204	-51.6858	7.01908	0	-0.248194	0	0	-22.0983		0.0928556	-6973.88	-8314.8	4069.8	-124.922	-546.445	-25.5192	-11.1889	-1401.97		-618.83	-66.9204	-51.6858	7.01908	0	-0.248194	0	0	-22.0983
281	Complex_1	0.0188459	0.666383	5.50909e-06	0	2.47101e-06	0	0	-0.647849		0.000304025	0.020682	-0.00122523	5.50909e-06	0	2.47101e-06	0	0	0.0214214		0.000477891	-66.9453	-51.335	7.00483	0	-0.248219	0	0	-22.4606		0.0936697	-7018.65	-8338.78	4001.09	-118.878	-549.34	-24.1973	-12.0886	-1378.22		-598.229	-66.9453	-51.335	7.00483	0	-0.248219	0	0	-22.4606
282	Complex_1	-0.0252558	0.282431	0.00110255	0	-2.9577e-06	0	0	-0.30204		-0.00674599	-0.0194389	0.0151911	0.00110255	0	-2.9577e-06	0	0	-0.0290837		-0.00664599	-66.9749	-51.685	7.01507	0	-0.248259	0	0	-22.1546		0.0979095	-6917.44	-8329.79	4091.69	-120.83	-554.783	-26.6722	-9.95436	-1374.22		-592.884	-66.9749	-51.685	7.01507	0	-0.248259	0	0	-22.1546
283	Complex_1	-0.021488	0.657402	-0.000189745	0	-4.51258e-06	0	0	-0.677817		-0.000879311	-0.0166674	0.00312474	-0.000189745	0	-4.51258e-06	0	0	-0.0188284		-0.000769452	-67.943	-49.7709	5.739	0	-0.248296	0	0	-23.8441		0.181269	-6947.47	-8315.53	4072.15	-125.571	-543.01	-27.233	-21.6114	-1388.95		-597.709	-67.943	-49.7709	5.739	0	-0.248296	0	0	-23.8441
284	Complex_1	0.0198044	0.968199	-0.00011545	0	-8.26756e-06	0	0	-0.947852		-0.000419506	0.0192483	0.00109431	-0.00011545	0	-8.26756e-06	0	0	0.0184757		-0.000197973	-67.9412	-49.7718	5.74022	0	-0.248309	0	0	-23.8425		0.18118	-7116.29	-8294.77	3980.74	-120.177	-550.904	-27.455	-15.271	-1393.28		-695.166	-67.9412	-49.7718	5.74022	0	-0.248309	0	0	-23.8425
285	Complex_1	0.0211516	0.502136	-2.12091e-06	0	7.79861e-07	0	0	-0.480536		-0.000447752	0.0234397	0.00082107	-2.12091e-06	0	7.79861e-07	0	0	0.0229245		-0.000304513	-67.9816	-49.7739	5.7407	0	-0.248315	0	0	-23.8821		0.182031	-6998.98	-8286.41	4006.56	-117.416	-544.693	-30.2016	-15.5129	-1410.56		-600.745	-67.9816	-49.7739	5.7407	0	-0.248315	0	0	-23.8821
286	Complex_1	0.00753427	0.539382	7.99738e-06	0	1.78281e-06	0	0	-0.531542		-0.000315298	0.0110694	0.000460901	7.99738e-06	0	1.78281e-06	0	0	0.010752		-0.000153244	-68.0683	-50.4739	5.73451	0	-0.248223	0	0	-23.2924		0.211679	-6920.57	-8282.24	4110.6	-123.338	-545.22	-26.2964	-20.6803	-1422.78		-610.619	-68.0683	-50.4739	5.73451	0	-0.248223	0	0	-23.2924
287	Complex_1	-0.0144497	0.945399	4.26459e-06	0	-1.24903e-06	0	0	-0.959111		-0.00074126	-0.0121133	0.00162335	4.26459e-06	0	-1.24903e-06	0	0	-0.0131818		-0.000557873	-68.0581	-50.4734	5.73224	0	-0.248245	0	0	-23.2819		0.21319	-6977.24	-8352.45	4025.81	-126.802	-547.233	-29.0577	-13.8575	-1385.52		-548.135	-68.0581	-50.4734	5.73224	0	-0.248245	0	0	-23.2819
288	Complex_1	-25.0373	8.72436	0.235523	-3.71681	-4.92941	-1.23092	0	-3.53392		-20.5861	0.767087	0.444006	0.235523	0	-0.00513984	0	0	-0.233309		0.326007	-66.8534	-51.675	7.0172	0	-0.248213	0	0	-22.0384		0.0910921	-6911.38	-8354.58	4100.91	-124.069	-553.569	-29.764	-15.0356	-1376.16		-559.116	-66.8534	-51.675	7.0172	0	-0.248213	0	0	-22.0384
289	Complex_1	-21.5314	6.13173	1.31851	-3.40561	-4.37756	-0.110825	0	-0.340261		-20.7474	1.70872	-1.96272	1.31851	0	-0.00302458	0	0	2.00034		0.355618	-68.1439	-49.7712	5.74329	0	-0.2483	0	0	-24.0479		0.18016	-7074.85	-8284.83	3947.83	-120.55	-552.516	-31.0875	-15.3376	-1420.31		-598.048	-68.1439	-49.7712	5.74329	0	-0.2483	0	0	-24.0479
290	Complex_1	-21.3433	15.5737	0.279222	-2.02534	-4.69983	-0.0161316	0	-7.87419		-22.5807	0.679753	-0.0513548	0.279222	0	-0.00143445	0	0	-0.00473724		0.458057	-66.8453	-51.682	7.01314	0	-0.24827	0	0	-22.0233		0.0950834	-6943.25	-8268.13	4012.65	-123.485	-543.208	-27.9797	-13.4241	-1396.91		-582.765	-66.8453	-51.682	7.01314	0	-0.24827	0	0	-22.0233
291	Complex_1	-0.0465744	0.592123	0.00271742	0	1.06624e-05	0	0	-0.637418		-0.00400777	-0.0406476	0.00748077	0.00271742	0	1.06624e-05	0	0	-0.0470435		-0.00381294	-67.9829	-49.7752	5.74059	0	-0.248289	0	0	-23.8821		0.182183	-7038.02	-8342.04	4039	-119.565	-549.766	-29.8929	-17.1462	-1373.89		-644.725	-67.9829	-49.7752	5.74059	0	-0.248289	0	0	-23.8821
292	Complex_1	0.0040615	0.63467	-0.000749179	0	-8.30909e-06	0	0	-0.630283		0.000432702	0.0128371	-0.000524709	-0.000749179	0	-8.30909e-06	0	0	0.0135032		0.000616146	-68.1167	-49.7709	5.74242	0	-0.248307	0	0	-24.0202		0.180263	-7044.44	-8277.57	4004.66	-118.122	-548.51	-33.524	-23.4414	-1407.49		-640.452	-68.1167	-49.7709	5.74242	0	-0.248307	0	0	-24.0202
293	Complex_1	0.0158553	0.831496	0.000184783	0	-2.71856e-06	0	0	-0.81596		0.000137382	0.0146359	-0.00182961	0.000184783	0	-2.71856e-06	0	0	0.0159065		0.000376945	-68.0845	-49.7701	5.74352	0	-0.248313	0	0	-23.9882		0.178592	-7007.29	-8252.82	4006.95	-114.964	-543.659	-29.2364	-19.2485	-1423.47		-630.847	-68.0845	-49.7701	5.74352	0	-0.248313	0	0	-23.9882
294	Complex_1	0.00388789	0.80759	-3.06172e-05	0	2.34816e-06	0	0	-0.803771		9.67443e-05	0.00294394	-0.000993628	-3.06172e-05	0	2.34816e-06	0	0	0.00363225		0.000333595	-66.951	-51.6782	7.01421	0	-0.24827	0	0	-22.1344		0.0956841	-6936.17	-8300.69	4047.35	-118.542	-543.058	-30.0093	-21.2959	-1389.09		-580.836	-66.951	-51.6782	7.01421	0	-0.24827	0	0	-22.1344
295	Complex_1	0.0579504	1.03601	0.000720229	0	2.02709e-05	0	0	-0.977132		-0.00167005	0.0583551	0.00158506	0.000720229	0	2.02709e-05	0	0	0.0574052		-0.00137568	-68.0392	-49.7758	5.74107	0	-0.248338	0	0	-23.9394		0.183218	-6951.52	-8270.04	4051.93	-120.086	-540.581	-30.8143	-15.5494	-1401.11		-625.262	-68.0392	-49.7758	5.74107	0	-0.248338	0	0	-23.9394
296	Complex_1	-0.0150108	0.735753	7.05443e-05	0	1.53139e-06	0	0	-0.750703		-0.000132227	-0.0117405	-0.00059633	7.05443e-05	0	1.53139e-06	0	0	-0.0113444		0.000128169	-67.9671	-49.7683	5.73724	0	-0.248355	0	0	-23.8703		0.182663	-6974.37	-8291.31	4009.39	-119.102	-551.421	-27.788	-20.6474	-1395.48		-578.01	-67.9671	-49.7683	5.73724	0	-0.248355	0	0	-23.8703
297	Complex_1	0.0489064	1.68811	-0.000743557	0	-3.27772e-05	0	0	-1.63953		0.00110051	0.046127	-0.000993955	-0.000743557	0	-3.27772e-05	0	0	0.0464797		0.00141751	-66.9422	-51.6703	7.01656	0	-0.248234	0	0	-22.1305		0.0902242	-6905.91	-8284.7	4097.74	-118.693	-540.588	-30.5412	-13.8642	-1381.57		-633.694	-66.9422	-51.6703	7.01656	0	-0.248234	0	0	-22.1305
298	Complex_1	-23.563	12.5343	1.13944	-3.70446	-5.70481	-0.661221	0	-7.09974		-20.0665	2.51372	0.264526	1.13944	0	-0.00344802	0	0	-0.119076		1.23227	-66.994	-51.6752	7.01622	0	-0.248234	0	0	-22.1794		0.092577	-7050.16	-8295.22	4051.74	-120.604	-551.067	-30.7499	-22.1649	-1389.89		-692.2	-66.994	-51.6752	7.01622	0	-0.248234	0	0	-22.1794
299	Complex_1	-22.8272	6.83203	1.79469	-3.5273	-4.79689	-0.548078	0	-2.38125		-20.2004	2.41025	-1.68955	1.79469	0	-0.00575271	0	0	1.7159		0.594961	-68.0596	-49.7738	5.7419	0	-0.248332	0	0	-23.9611		0.181665	-7032.55	-8329.54	4059	-121.149	-553.628	-31.0063	-17.8338	-1411.34		-627.061	-68.0596	-49.7738	5.7419	0	-0.248332	0	0	-23.9611
300	Complex_1	-21.8132	11.5939	0.989123	-3.1985	-5.29455	-0.21432	0	-5.91418		-19.7747	2.86515	-0.523822	0.989123	0	-0.00313993	0	0	0.688433		1.71455	-66.9211	-51.6753	7.00836	0	-0.248403	0	0	-22.1069		0.101159	-7057.91	-8297.02	4067.6	-122.594	-553.916	-28.285	-17.7616	-1421.09		-684.84	-66.9211	-51.6753	7.00836	0	-0.248403	0	0	-22.1069
301	Complex_1	-22.7318	9.65447	0.60143	-2.76229	-5.50951	-0.0206424	0	-3.15916		-21.5361	1.4656	-0.805665	0.60143	0	-0.00479596	0	0	0.569969		1.10466	-66.8979	-51.6739	7.01498	0	-0.248233	0	0	-22.0831		0.0924015	-7009.01	-8302.95	4022.27	-123.014	-553.445	-31.2656	-23.8282	-1401.56		-595.224	-66.8979	-51.6739	7.01498	0	-0.248233	0	0	-22.0831
302	Complex_1	-26.0545	11.9656	0.705553	-3.41787	-5.30725	-0.127401	0	-6.72509		-23.148	1.48307	-0.11834	0.705553	0	-0.00335553	0	0	0.189079		0.710135	-66.9236	-51.6715	7.0158	0	-0.24822	0	0	-22.1105		0.0908359	-7030.52	-8259.4	3967.93	-124.546	-550.641	-31.3839	-22.1364	-1435.78		-574.551	-66.9236	-51.6715	7.0158	0	-0.24822	0	0	-22.1105
303	Complex_1	-23.085	9.1135	2.127	-3.78182	-5.14903	-0.00733409	0	-3.59819		-21.7891	2.16862	-2.44778	2.127	0	-0.0029394	0	0	1.9575		0.534836	-67.9338	-49.7892	5.74318	0	-0.248318	0	0	-23.8241		0.184643	-7007.51	-8249.63	4070.11	-122.674	-551.846	-30.3833	-20.1975	-1407.14		-695.76	-67.9338	-49.7892	5.74318	0	-0.248318	0	0	-23.8241
304	Complex_1	-22.4081	5.84878	1.69322	-3.45803	-5.03393	-0.00482445	0	0.624664		-22.078	2.21701	-0.953686	1.69322	0	0.00104444	0	0	1.08136		0.395071	-67.8749	-49.7754	5.74202	0	-0.248296	0	0	-23.7746		0.181333	-6952.27	-8236.35	4095	-121.908	-556.039	-29.3624	-26.9077	-1439.51		-637.197	-67.8749	-49.7754	5.74202	0	-0.248296	0	0	-23.7746
305	Complex_1	-23.8159	10.0821	2.54535	-3.72491	-5.7249	-0.0715346	0	-4.48096		-22.4411	2.86786	-2.53515	2.54535	0	-0.00354297	0	0	2.15064		0.710556	-67.9897	-49.7734	5.74214	0	-0.248288	0	0	-23.8903		0.180198	-7136.91	-8241.05	3953.74	-125.987	-544.977	-27.8727	-11.7712	-1452.9		-686.081	-67.9897	-49.7734	5.74214	0	-0.248288	0	0	-23.8903
306	Complex_1	-22.7801	10.8937	0.85615	-3.12584	-5.38174	-0.020758	0	-4.1161		-21.8856	1.5575	-0.159791	0.85615	0	-0.000480118	0	0	0.351722		0.509896	-68.0255	-49.7612	5.74563	0	-0.248278	0	0	-23.937		0.175394	-7113.16	-8251.95	3973.2	-123.964	-549.226	-27.8531	-20.1113	-1447.25		-665.996	-68.0255	-49.7612	5.74563	0	-0.248278	0	0	-23.937
307	Complex_1	-22.0308	9.98373	1.68024	-3.22487	-5.017	-0.361607	0	-4.68287		-20.4084	1.93741	-2.25194	1.68024	0	-0.00558708	0	0	1.98392		0.530785	-68.0361	-49.7652	5.7419	0	-0.248259	0	0	-23.9418		0.177221	-7007.11	-8258.85	4068.76	-123.724	-549.432	-31.928	-18.017	-1420.22		-673.708	-68.0361	-49.7652	5.7419	0	-0.248259	0	0	-23.9418
308	Complex_1	-22.5994	11.5509	0.367184	-3.02481	-4.99642	-0.00556889	0	-5.7216		-20.769	0.889344	-0.239117	0.367184	0	-0.000411736	0	0	0.18933		0.572358	-68.1121	-50.4682	5.73384	0	-0.248233	0	0	-23.3391		0.209601	-7038.6	-8341.67	4014.75	-126.822	-546.913	-29.1952	-16.8569	-1369.27		-622.628	-68.1121	-50.4682	5.73384	0	-0.248233	0	0	-23.3391
309	Complex_1	-24.0572	8.98008	1.57002	-3.53548	-5.03896	-0.0631989	0	-3.88965		-22.08	1.85154	-2.00399	1.57002	0	-0.00136031	0	0	1.96934		0.317531	-68.0044	-49.7714	5.73788	0	-0.248429	0	0	-23.9055		0.183065	-7054.88	-8318.16	4039.5	-129.862	-552.515	-26.5503	-22.2126	-1386.15		-658.933	-68.0044	-49.7714	5.73788	0	-0.248429	0	0	-23.9055
310	Complex_1	-19.945	11.7554	0.434286	-2.60823	-4.47554	-0.00615451	0	-3.33914		-21.7056	0.876698	-0.00847082	0.434286	0	-0.0014222	0	0	0.146183		0.306122	-68.2022	-50.475	5.7336	0	-0.248247	0	0	-23.4254		0.21291	-7046.37	-8282.78	4014.54	-124.338	-548.291	-27.541	-14.2412	-1403.7		-660.016	-68.2022	-50.475	5.7336	0	-0.248247	0	0	-23.4254
311	Complex_1	-20.0111	16.8916	0.950489	-1.81893	-5.41671	-0.0925965	0	-8.37265		-22.1523	1.69544	-0.131241	0.950489	0	-0.00310167	0	0	0.0745172		0.804775	-67.9696	-50.4759	5.73495	0	-0.248226	0	0	-23.1917		0.211216	-6958.1	-8276.16	4056.47	-121.599	-554.878	-28.7519	-9.71943	-1406.73		-616.727	-67.9696	-50.4759	5.73495	0	-0.248226	0	0	-23.1917
312	Complex_1	-23.293	10.706	1.32492	-3.16158	-4.40138	-0.0391908	0	-3.74888		-23.9729	1.65093	-1.27466	1.32492	0	0.0019235	0	0	1.06096		0.53778	-67.8911	-49.7747	5.7411	0	-0.248307	0	0	-23.7909		0.181734	-7021.98	-8295.38	4058.79	-125.084	-558.257	-26.6344	-13.1604	-1414.37		-647.888	-67.8911	-49.7747	5.7411	0	-0.248307	0	0	-23.7909
313	Complex_1	-21.7382	9.95247	0.989721	-3.11016	-4.54399	-0.111278	0	-2.25611		-22.6588	1.79444	-0.812081	0.989721	0	-0.00397854	0	0	0.62016		1.00062	-68.0719	-50.4689	5.73648	0	-0.248155	0	0	-23.2984		0.207041	-6929.61	-8301.21	4118.64	-123.457	-557.409	-25.4863	-19.3736	-1412.98		-608.337	-68.0719	-50.4689	5.73648	0	-0.248155	0	0	-23.2984
314	Complex_1	-19.9578	18.8517	1.76375	-3.62319	-4.80093	-0.892085	0	-9.85005		-21.4069	3.06074	-1.00018	1.76375	0	-0.000666764	0	0	0.88239		1.41544	-68.0167	-50.4801	5.73434	0	-0.248208	0	0	-23.2345		0.2118	-7063.73	-8353.99	4005.68	-128.843	-553.376	-25.3215	-21.3004	-1379.67		-606.917	-68.0167	-50.4801	5.73434	0	-0.248208	0	0	-23.2345
315	Complex_1	-20.9461	14.8398	1.0732	-2.54829	-4.64949	-0.00253163	0	-3.35255		-26.3062	1.8716	0.582217	1.0732	0	-0.00110285	0	0	-0.362677		0.579964	-68.0936	-50.4713	5.73434	0	-0.248229	0	0	-23.3191		0.210668	-7005.88	-8342.22	4055.88	-123.074	-555.564	-26.6956	-12.9814	-1364.66		-636.57	-68.0936	-50.4713	5.73434	0	-0.248229	0	0	-23.3191
316	Complex_1	-21.398	12.7265	0.259798	-1.93917	-4.07013	-0.0382645	0	-4.58129		-23.7554	0.44232	0.217446	0.259798	0	0.001369	0	0	-0.00489199		-0.0314004	-68.0546	-50.4793	5.73423	0	-0.248266	0	0	-23.2753		0.21402	-6988.07	-8342.23	4043.56	-121.594	-544.823	-27.8102	-16.796	-1391.71		-586.666	-68.0546	-50.4793	5.73423	0	-0.248266	0	0	-23.2753
317	Complex_1	-19.3832	10.295	1.84636	-2.36724	-4.56775	-0.164703	0	-4.49034		-19.9345	2.38216	-1.57225	1.84636	0	-0.00614073	0	0	1.13457		0.979622	-68.0651	-50.4742	5.73418	0	-0.248218	0	0	-23.2887		0.211761	-7075.98	-8383.08	4047.38	-129.27	-556.945	-25.7325	-14.6235	-1394.79		-618.932	-68.0651	-50.4742	5.73418	0	-0.248218	0	0	-23.2887
318	Complex_1	-24.3721	6.6572	0.598392	-3.12299	-4.0646	-1.58332e-05	0	2.48235		-26.9224	0.496843	-0.314221	0.598392	0	0.00600154	0	0	0.195544		0.0111263	-68.0552	-50.4742	5.73423	0	-0.248245	0	0	-23.2787		0.211722	-7068.71	-8295.29	4025.67	-127.68	-550.351	-22.6934	-13.5947	-1415.83		-668.935	-68.0552	-50.4742	5.73423	0	-0.248245	0	0	-23.2787
319	Complex_1	-0.0331919	0.567757	-0.000754014	0	-1.34795e-05	0	0	-0.601818		0.0016364	-0.0305078	-0.00121922	-0.000754014	0	-1.34795e-05	0	0	-0.0302747		0.00175359	-68.0655	-50.4749	5.73466	0	-0.24823	0	0	-23.2881		0.211005	-6949.16	-8360.43	4114.32	-126.27	-544.998	-24.7938	-14.3855	-1395.09		-597.515	-68.0655	-50.4749	5.73466	0	-0.24823	0	0	-23.2881
320	Complex_1	-0.114412	0.294	-0.000334572	0	0.000134908	0	0	-0.400679		-0.00753244	-0.1095	0.0184875	-0.000334572	0	0.000134908	0	0	-0.120332		-0.00745528	-68.0667	-50.4738	5.73124	0	-0.248321	0	0	-23.2909		0.215083	-7029.01	-8360.96	4018.86	-126.003	-543.584	-26.1309	-13.2905	-1391.39		-586.509	-68.0667	-50.4738	5.73124	0	-0.248321	0	0	-23.2909
321	Complex_1	-0.0336295	0.547291	-7.18687e-05	0	-6.454e-06	0	0	-0.579897		-0.000945537	-0.0226372	0.00359867	-7.18687e-05	0	-6.454e-06	0	0	-0.025357		-0.0008005	-68.1791	-50.4769	5.73307	0	-0.24828	0	0	-23.4017		0.214698	-7004.68	-8285.54	4067.52	-122.008	-550.298	-26.689	-12.7474	-1434.17		-640.737	-68.1791	-50.4769	5.73307	0	-0.24828	0	0	-23.4017
322	Complex_1	-18.524	15.5478	0.864949	-1.78897	-4.42989	-0.000721326	0	-7.20679		-21.5104	1.30897	-0.553565	0.864949	0	0.00445852	0	0	0.515869		0.477262	-68.1462	-50.4779	5.73337	0	-0.248245	0	0	-23.3668		0.213397	-7041.57	-8276.54	3979.07	-119.39	-541.847	-25.0465	-14.672	-1406.19		-636.957	-68.1462	-50.4779	5.73337	0	-0.248245	0	0	-23.3668
323	Complex_1	-27.4504	-1.9978	1.10608	-3.06446	-4.12703	-0.151153	0	6.55839		-25.7745	1.00237	0.0791736	1.10608	0	0.0026324	0	0	-0.252832		0.0673175	-68.0207	-49.7675	5.73647	0	-0.24829	0	0	-23.9226		0.181258	-7022.46	-8275.47	4095.51	-122.44	-558.199	-27.4479	-13.7735	-1421.69		-698.959	-68.0207	-49.7675	5.73647	0	-0.24829	0	0	-23.9226
324	Complex_1	-27.2636	-0.959801	2.6292	-3.65051	-3.93542	-0.669397	0	4.87839		-25.5561	2.83098	0.154299	2.6292	0	0.00520808	0	0	-0.494814		0.537085	-68.0338	-49.7831	5.74285	0	-0.248335	0	0	-23.9294		0.184212	-7029.04	-8249	4060.18	-119.993	-551.589	-25.9618	-14.9346	-1420.55		-707.188	-68.0338	-49.7831	5.74285	0	-0.248335	0	0	-23.9294
325	Complex_1	-26.3309	4.45949	1.86716	-2.88718	-4.50132	-0.340344	0	2.3784		-27.3071	2.08873	-0.0379825	1.86716	0	-0.00115522	0	0	-0.350866		0.611574	-68.1707	-50.4764	5.73508	0	-0.248255	0	0	-23.3925		0.211421	-7078.24	-8314.67	4048.95	-123.142	-553.285	-28.7517	-16.1621	-1419.64		-671.54	-68.1707	-50.4764	5.73508	0	-0.248255	0	0	-23.3925
326	Complex_1	-23.9282	4.82328	2.55594	-3.45189	-4.18527	-0.691528	0	4.29513		-27.2739	2.36609	-1.10245	2.55594	0	0.00587704	0	0	0.69608		0.210637	-68.0202	-50.4796	5.73231	0	-0.248282	0	0	-23.2397		0.21507	-7096.03	-8350.15	4083.2	-124.464	-564.361	-28.3437	-11.7597	-1435.22		-664.928	-68.0202	-50.4796	5.73231	0	-0.248282	0	0	-23.2397
327	Complex_1	-28.2279	1.5009	1.78993	-3.47059	-4.48113	-1.00968	0	2.25441		-24.8117	2.01807	-0.499549	1.78993	0	-0.000573521	0	0	0.426492		0.301773	-68.0212	-49.7878	5.74201	0	-0.248425	0	0	-23.9145		0.187534	-7122.57	-8368.16	4028.87	-130.439	-564.776	-25.9711	-11.7193	-1404.14		-646.235	-68.0212	-49.7878	5.74201	0	-0.248425	0	0	-23.9145
328	Complex_1	-26.04	-0.103626	2.31314	-3.37839	-4.26722	-1.17137	0	2.98121		-22.4137	2.82112	-0.688086	2.31314	0	0.00106057	0	0	0.614444		0.580555	-68.0445	-49.7808	5.74283	0	-0.248335	0	0	-23.942		0.183918	-7187.27	-8370.38	3935.87	-128.985	-570.732	-25.148	-12.0843	-1372.29		-643.513	-68.0445	-49.7808	5.74283	0	-0.248335	0	0	-23.942
329	Complex_1	-26.8213	3.27527	1.27555	-3.51174	-4.56319	-0.488873	0	2.04648		-24.8549	1.30547	-0.588429	1.27555	0	0.00258012	0	0	0.399741		0.216023	-68.1327	-50.479	5.73521	0	-0.248259	0	0	-23.3534		0.212703	-7053.63	-8388.9	4089.47	-129.769	-564.559	-26.7403	-8.51937	-1389.11		-635.509	-68.1327	-50.479	5.73521	0	-0.248259	0	0	-23.3534
330	Complex_1	-26.1585	-0.758227	1.6549	-3.40228	-4.34277	-0.675832	0	4.44864		-23.0829	1.82323	-0.58764	1.6549	0	0.00108329	0	0	0.463478		0.291407	-68.1381	-49.77	5.74219	0	-0.248319	0	0	-24.0416		0.179688	-7075.57	-8387.37	4082.3	-134.922	-572.816	-28.3507	-8.49675	-1363.72		-662.197	-68.1381	-49.77	5.74219	0	-0.248319	0	0	-24.0416
331	Complex_1	-26.3903	3.07092	3.08919	-3.38678	-4.05224	-0.545885	0	0.605927		-25.1714	2.82213	-2.49354	3.08919	0	0.00100042	0	0	1.81205		0.413436	-67.9436	-49.7824	5.74024	0	-0.248338	0	0	-23.8392		0.186051	-7086.46	-8365.76	4013.86	-127.124	-564.15	-27.85	-6.77507	-1383.34		-625.309	-67.9436	-49.7824	5.74024	0	-0.248338	0	0	-23.8392
332	Complex_1	-27.6553	-1.5435	1.71561	-3.91572	-4.29823	-0.448753	0	2.94168		-22.1063	1.65181	-1.3144	1.71561	0	0.00174661	0	0	0.813808		0.43505	-68.0429	-50.4741	5.73451	0	-0.248227	0	0	-23.2662		0.211135	-7170.49	-8368.98	4001.16	-129.365	-555.961	-24.2031	-11.6703	-1366.53		-714.937	-68.0429	-50.4741	5.73451	0	-0.248227	0	0	-23.2662
333	Complex_1	-27.8366	-0.36967	2.38393	-2.93112	-4.58361	-1.14161	0	3.49412		-24.6886	2.27344	-1.4609	2.38393	0	0.00106366	0	0	1.02571		0.323636	-68.0167	-50.4769	5.73427	0	-0.248256	0	0	-23.2381		0.212264	-7048.41	-8398.82	4101.12	-130.116	-564.382	-26.2653	-12.3306	-1370.04		-647.569	-68.0167	-50.4769	5.73427	0	-0.248256	0	0	-23.2381
334	Complex_1	-30.5421	2.48407	1.4581	-3.42496	-4.85702	-0.835087	0	1.05783		-26.4251	1.237	-1.72027	1.4581	0	-0.00121662	0	0	1.29393		0.206458	-68.0712	-49.771	5.74133	0	-0.248327	0	0	-23.9742		0.180899	-7006.15	-8368.1	4074.05	-130.702	-555.97	-21.9413	-13.3801	-1367.64		-622.473	-68.0712	-49.771	5.74133	0	-0.248327	0	0	-23.9742
335	Complex_1	-26.3269	0.600484	1.92012	-3.51671	-4.27726	-0.727936	0	0.821766		-21.1473	2.11404	-0.681132	1.92012	0	0.000867694	0	0	0.341603		0.532585	-67.8595	-49.7851	5.73892	0	-0.248338	0	0	-23.7514		0.186481	-7056.14	-8387.72	4060.76	-129.764	-560.765	-26.9623	-14.2094	-1388.52		-608.957	-67.8595	-49.7851	5.73892	0	-0.248338	0	0	-23.7514
336	Complex_1	-1.81899e-11	-3.63798e-12	-9.09495e-13	0	0	0	0	-1.36424e-11		-5.68434e-13	0	0	0	0	0	0	0	0		0	-68.1568	-50.4779	5.73367	0	-0.248248	0	0	-23.378		0.213595	-7048.86	-8310.01	3980.12	-125.543	-553.667	-27.3043	-15.3379	-1409.28		-587.835	-68.1568	-50.4779	5.73367	0	-0.248248	0	0	-23.378
337	Complex_1	6.36646e-12	-7.27596e-12	-1.36424e-12	0	-1.13687e-13	0	0	1.47793e-11		6.82121e-13	0	0	0	0	0	0	0	0		0	-67.9966	-50.4924	5.73243	0	-0.248357	0	0	-23.2106		0.222285	-7116.53	-8353.93	3988.54	-128.113	-568.641	-25.5456	-15.5287	-1416.14		-597.178	-67.9966	-50.4924	5.73243	0	-0.248357	0	0	-23.2106
338	Complex_1	-7.27596e-12	-5.45697e-12	-9.09495e-13	0	0	0	0	-6.36646e-12		-2.27374e-13	0	0	0	0	0	0	0	0		0	-68.0728	-49.7764	5.74129	0	-0.24834	0	0	-23.9725		0.183177	-6964.23	-8333.56	4118.13	-122.373	-558.919	-27.3748	-12.972	-1392.82		-634.341	-68.0728	-49.7764	5.74129	0	-0.24834	0	0	-23.9725
339	Complex_1	-26.0512	7.87881	1.75345	-2.03781	-4.24233	-1.31334	0	-0.665262		-27.4247	1.63415	-0.804992	1.75345	0	0.00344626	0	0	0.550459		0.131788	-68.0627	-50.4851	5.73502	0	-0.248299	0	0	-23.2817		0.217419	-7093.75	-8330.27	4040.63	-124.745	-560.71	-27.2861	-9.63494	-1422.38		-659.359	-68.0627	-50.4851	5.73502	0	-0.248299	0	0	-23.2817
340	Complex_1	-28.437	5.98303	2.18752	-2.91258	-4.50333	-0.880021	0	1.26865		-29.5803	2.1564	0.586849	2.18752	0	0.00125092	0	0	-0.714963		0.0957403	-68.0011	-49.7751	5.74071	0	-0.248329	0	0	-23.9011		0.182702	-6985.04	-8298.6	4073.56	-126.948	-560.247	-24.4606	-8.68422	-1415.74		-623.922	-68.0011	-49.7751	5.74071	0	-0.248329	0	0	-23.9011
341	Complex_1	-18.6372	3.20763	3.80211	-3.53205	-3.84247	-0.161669	0	3.91264		-22.0234	4.39725	-2.37825	3.80211	0	-0.00758991	0	0	1.52145		1.45952	-68.0594	-50.4816	5.73305	0	-0.248252	0	0	-23.2784		0.21585	-7073.1	-8291.99	4009.61	-125.125	-561.735	-21.3315	-8.28452	-1403.9		-670.34	-68.0594	-50.4816	5.73305	0	-0.248252	0	0	-23.2784
342	Complex_1	-28.7742	1.35858	1.82313	-3.02043	-4.20787	-0.497365	0	3.70662		-27.9369	1.68778	0.323633	1.82313	0	0.000375834	0	0	-0.708025		0.248661	-67.9391	-49.7756	5.74174	0	-0.248317	0	0	-23.8385		0.181577	-7017.48	-8290.48	4063.62	-126.339	-564.562	-27.0851	-6.27604	-1426.84		-639.509	-67.9391	-49.7756	5.74174	0	-0.248317	0	0	-23.8385
343	Complex_1	-26.2258	3.93073	2.63427	-3.8176	-4.41915	-0.126655	0	2.16844		-26.5959	2.77481	-1.93489	2.63427	0	0.00709926	0	0	1.47677		0.591553	-68.032	-50.4738	5.73333	0	-0.248232	0	0	-23.256		0.21261	-6994.59	-8328.11	4093.84	-132.197	-568.385	-28.1294	-7.72551	-1429.72		-594.161	-68.032	-50.4738	5.73333	0	-0.248232	0	0	-23.256
344	Complex_1	-23.6292	3.58628	2.19651	-3.5527	-4.12429	-0.477269	0	4.62046		-25.8781	1.87313	-1.40235	2.19651	0	0.0129052	0	0	0.924893		0.141171	-68.0596	-50.4731	5.73422	0	-0.248215	0	0	-23.2839		0.211401	-7038.07	-8268.97	4052.15	-125.991	-555.375	-28.8299	-9.83291	-1446.32		-654.898	-68.0596	-50.4731	5.73422	0	-0.248215	0	0	-23.2839
345	Complex_1	-24.1798	3.38746	2.88114	-3.56818	-4.8512	-0.109332	0	3.24416		-25.1638	4.09118	-1.33159	2.88114	0	-0.00824797	0	0	0.703053		1.84684	-67.9282	-49.7723	5.74169	0	-0.248321	0	0	-23.8301		0.180867	-7123.92	-8300.6	4034.89	-125.89	-563.737	-24.8676	-9.37486	-1447.22		-687.112	-67.9282	-49.7723	5.74169	0	-0.248321	0	0	-23.8301
346	Complex_1	-26.0675	3.94226	3.22961	-3.5744	-4.44571	-1.28165	0	4.82031		-28.7579	3.04766	-1.62028	3.22961	0	0.0050738	0	0	1.24208		0.191181	-68.102	-50.4742	5.73532	0	-0.248216	0	0	-23.3252		0.210344	-7113.84	-8255.81	3948.17	-125.384	-569.699	-29.1666	-10.1016	-1448.84		-623.005	-68.102	-50.4742	5.73532	0	-0.248216	0	0	-23.3252
347	Complex_1	-26.7848	-2.39566	2.33891	-4.0304	-4.02954	-0.12935	0	5.31096		-23.8498	2.42511	-0.823714	2.33891	0	-0.00500536	0	0	0.482155		0.432762	-67.9743	-50.4705	5.73397	0	-0.248213	0	0	-23.1993		0.20974	-7057.7	-8280.75	4085.28	-125.082	-558.97	-24.9632	-9.31018	-1415.98		-727.932	-67.9743	-50.4705	5.73397	0	-0.248213	0	0	-23.1993
348	Complex_1	-26.662	-1.91988	1.41322	-2.95613	-4.3997	-0.0950909	0	4.94818		-23.6526	1.80013	-0.642626	1.41322	0	-0.00389116	0	0	0.500635		0.532791	-68.0736	-49.7722	5.74198	0	-0.2483	0	0	-23.9751		0.180071	-6978.47	-8299.3	4108.25	-125.643	-560.848	-25.0448	-9.9966	-1408.11		-657.782	-68.0736	-49.7722	5.74198	0	-0.2483	0	0	-23.9751
349	Complex_1	-30.7779	1.01355	2.11058	-3.33782	-4.64362	-0.147834	0	3.13461		-28.9074	1.79512	-1.49497	2.11058	0	0.00562628	0	0	1.16371		0.0101777	-67.9995	-49.7725	5.74141	0	-0.248329	0	0	-23.9013		0.181267	-6977.82	-8240.63	4130.78	-124.923	-559.722	-22.3694	-6.23179	-1438.47		-716.253	-67.9995	-49.7725	5.74141	0	-0.248329	0	0	-23.9013
350	Complex_1	-26.8803	-2.0675	2.93953	-3.59338	-4.33092	-0.626181	0	5.35353		-24.5554	2.47691	-1.86902	2.93953	0	0.0074984	0	0	1.15495		0.243942	-68.0623	-50.4807	5.73492	0	-0.248342	0	0	-23.2824		0.21422	-7074.05	-8289.98	4029.77	-123.321	-558.462	-26.2854	-8.43044	-1405.45		-691.892	-68.0623	-50.4807	5.73492	0	-0.248342	0	0	-23.2824
351	Complex_1	-0.076089	1.29393	0.00101046	0	3.96256e-06	0	0	-1.3708		-0.000228565	-0.0341877	-0.00229488	0.00101046	0	3.96256e-06	0	0	-0.0329979		9.05717e-05	-67.9619	-49.782	5.7373	0	-0.248345	0	0	-23.8561		0.187236	-7057.3	-8282.82	3999.7	-121.113	-563.325	-28.1353	-7.52811	-1422.93		-631.146	-67.9619	-49.782	5.7373	0	-0.248345	0	0	-23.8561
352	Complex_1	-0.0348996	1.09865	-0.000166648	0	3.88353e-05	0	0	-1.13268		-0.000741991	-0.00200306	-0.00045792	-0.000166648	0	3.88353e-05	0	0	-0.000951337		-0.000465993	-67.9514	-49.7765	5.74128	0	-0.248332	0	0	-23.8508		0.182866	-6897.05	-8235.59	4124.39	-121.292	-543.744	-25.0651	-11.8621	-1432.42		-651.464	-67.9514	-49.7765	5.74128	0	-0.248332	0	0	-23.8508
353	Complex_1	-0.0516674	1.21854	0.000893516	0	-3.2672e-05	0	0	-1.27183		0.000760611	-0.0222584	-0.000507371	0.000893516	0	-3.2672e-05	0	0	-0.023775		0.00116316	-68.1239	-50.4758	5.73481	0	-0.248192	0	0	-23.3447		0.210003	-6994.66	-8309.53	4083.56	-125.549	-551.341	-23.9778	-11.1705	-1429.52		-627.134	-68.1239	-50.4758	5.73481	0	-0.248192	0	0	-23.3447
354	Complex_1	0.013335	1.14987	-0.000283411	0	1.60842e-06	0	0	-1.13597		-0.000289364	0.0600617	0.000205077	-0.000283411	0	1.60842e-06	0	0	0.0600641		7.43696e-05	-68.0055	-49.7788	5.74217	0	-0.248291	0	0	-23.9024		0.181921	-6982.47	-8266.78	4063.25	-122.538	-544.467	-27.0362	-16.0888	-1451.41		-617.398	-68.0055	-49.7788	5.74217	0	-0.248291	0	0	-23.9024
355	Complex_1	-0.0384613	1.22703	0.00013742	0	8.95547e-06	0	0	-1.26064		-0.00500304	0.00250903	0.00874038	0.00013742	0	8.95547e-06	0	0	-0.00174244		-0.00463529	-67.9538	-49.7848	5.7373	0	-0.248391	0	0	-23.847		0.189075	-7032.68	-8254.39	4016.2	-119.457	-556.766	-25.9632	-10.155	-1465.74		-616.406	-67.9538	-49.7848	5.7373	0	-0.248391	0	0	-23.847
356	Complex_1	-0.0540253	1.11017	0.000710406	0	1.82883e-05	0	0	-1.16291		-0.00201758	-0.0217583	0.00147662	0.000710406	0	1.82883e-05	0	0	-0.0223035		-0.0016601	-68.0585	-50.4779	5.73308	0	-0.248267	0	0	-23.2799		0.214453	-6936.06	-8265.47	4085.26	-124.054	-548.249	-24.278	-8.01324	-1470.65		-580.607	-68.0585	-50.4779	5.73308	0	-0.248267	0	0	-23.2799
357	Complex_1	-0.0115052	1.03614	-0.000190608	0	-1.70847e-06	0	0	-1.04723		-0.000224704	0.0259295	-6.62105e-05	-0.000190608	0	-1.70847e-06	0	0	0.0259803		0.000207797	-67.9061	-49.7997	5.745	0	-0.248295	0	0	-23.7913		0.188083	-6992.25	-8245.2	4056.65	-120.669	-549.159	-22.6355	-7.21911	-1463.67		-640.343	-67.9061	-49.7997	5.745	0	-0.248295	0	0	-23.7913
358	Complex_1	0.0844275	0.419256	0.000856608	0	2.27341e-05	0	0	-0.336527		0.000819593	0.0827169	-0.00254226	0.000856608	0	2.27341e-05	0	0	0.0835379		0.000841914	-68.0331	-49.7722	5.74087	0	-0.248347	0	0	-23.9348		0.181315	-7043.43	-8194.12	4027.45	-121.387	-541.156	-25.3969	-6.12031	-1509.12		-673.574	-68.0331	-49.7722	5.74087	0	-0.248347	0	0	-23.9348
359	Complex_1	-18.1363	2.70178	4.22491	-4.30691	-3.56088	-0.510095	0	1.7543		-18.4394	4.49019	-2.78636	4.22491	0	0.00141785	0	0	1.8366		1.21363	-68.107	-50.4972	5.73636	0	-0.2483	0	0	-23.3178		0.219965	-6974.58	-8271.5	4079.36	-128.406	-553.739	-26.0369	-6.09904	-1453.46		-614.703	-68.107	-50.4972	5.73636	0	-0.2483	0	0	-23.3178
360	Complex_1	-17.445	3.64432	2.58216	-4.14962	-3.88458	-0.824194	0	2.44723		-17.2604	3.89381	-2.07556	2.58216	0	0.0215242	0	0	1.54797		1.81772	-68.0804	-49.7932	5.74214	0	-0.248361	0	0	-23.9687		0.187783	-6979.05	-8199.53	4046.49	-124.547	-557.123	-23.4159	-7.65191	-1474.79		-638.478	-68.0804	-49.7932	5.74214	0	-0.248361	0	0	-23.9687
361	Complex_1	-0.0786107	0.246158	0.00212311	0	1.6295e-06	0	0	-0.330577		0.00368398	-0.0737832	-0.0147053	0.00212311	0	1.6295e-06	0	0	-0.0649071		0.00370451	-68.0999	-50.4709	5.73494	0	-0.24825	0	0	-23.3257		0.210044	-7013.82	-8210.19	4051.99	-121.986	-544.479	-22.8889	-8.22845	-1502.48		-655.551	-68.0999	-50.4709	5.73494	0	-0.24825	0	0	-23.3257
362	Complex_1	-0.193514	0.309001	0.00149486	0	2.27406e-05	0	0	-0.499726		-0.00430735	-0.189819	0.0113806	0.00149486	0	2.27406e-05	0	0	-0.19843		-0.00428649	-67.9555	-50.4827	5.73313	0	-0.248259	0	0	-23.1724		0.214718	-6950.83	-8224.94	4074.65	-125.096	-556.917	-23.0554	-10.0522	-1486.59		-598.827	-67.9555	-50.4827	5.73313	0	-0.248259	0	0	-23.1724
363	Complex_1	0.00540074	0.274345	-0.000234905	0	-1.40078e-06	0	0	-0.268694		-1.43939e-05	0.0115903	0.0011006	-0.000234905	0	-1.40078e-06	0	0	0.0106916		3.43609e-05	-68.122	-50.474	5.73387	0	-0.248249	0	0	-23.3459		0.212289	-6989.03	-8201.1	4083.78	-120.671	-550.582	-21.1121	-7.76619	-1487.82		-683.755	-68.122	-50.474	5.73387	0	-0.248249	0	0	-23.3459
364	Complex_1	-30.2249	2.77508	1.97574	-3.81182	-4.42581	-1.873	0	5.26762		-30.1327	1.96181	-2.18182	1.97574	0	-6.24697e-05	0	0	1.71455		0.453399	-68.0147	-49.7728	5.74246	0	-0.248353	0	0	-23.9164		0.180317	-7022.16	-8203.48	4042.4	-122.896	-555.708	-26.8982	-12.3736	-1482.8		-660.407	-68.0147	-49.7728	5.74246	0	-0.248353	0	0	-23.9164
365	Complex_1	-27.3375	-1.40402	2.04974	-4.07611	-4.22061	-0.649865	0	6.27507		-25.3117	2.41171	-1.85548	2.04974	0	-0.000137864	0	0	1.43272		0.784865	-68.1392	-50.4774	5.73524	0	-0.248195	0	0	-23.3591		0.210244	-6984.32	-8216.23	4069.05	-119.403	-555.575	-25.4467	-9.02085	-1451.79		-675.908	-68.1392	-50.4774	5.73524	0	-0.248195	0	0	-23.3591
366	Complex_1	-0.264754	1.4364	0.00286583	0	2.04015e-05	0	0	-1.69991		-0.0041308	-0.233649	0.00672143	0.00286583	0	2.04015e-05	0	0	-0.239385		-0.00387209	-67.9976	-50.4874	5.73288	0	-0.248258	0	0	-23.2119		0.217033	-6987.58	-8232.66	4084.52	-118.71	-550.884	-26.2613	-8.50023	-1489.14		-645.95	-67.9976	-50.4874	5.73288	0	-0.248258	0	0	-23.2119
367	Complex_1	-24.7679	0.237628	2.48427	-3.87831	-4.18557	-1.09639	0	6.13679		-24.4663	2.43101	-1.72198	2.48427	0	0.00346309	0	0	1.19643		0.468821	-68.0582	-50.4735	5.73495	0	-0.248206	0	0	-23.2816		0.210091	-7095.64	-8286.72	3998.15	-123.556	-559.514	-26.7643	-9.74011	-1436.12		-651.368	-68.0582	-50.4735	5.73495	0	-0.248206	0	0	-23.2816
368	Complex_1	-22.6688	-2.36173	1.96269	-4.30194	-4.2717	-0.463798	0	7.18785		-20.4202	2.0886	-2.35424	1.96269	0	0.00587341	0	0	1.76916		0.705115	-68.0246	-49.7806	5.74176	0	-0.248319	0	0	-23.921		0.183486	-7003.26	-8289.97	4116.18	-125.617	-565.246	-26.9901	-12.5504	-1449.7		-649.365	-68.0246	-49.7806	5.74176	0	-0.248319	0	0	-23.921
369	Complex_1	-24.4314	2.39407	1.61042	-3.67346	-3.91952	-0.453422	0	5.02207		-25.4116	1.48095	-0.942405	1.61042	0	0.00166113	0	0	0.640791		0.170484	-68.1148	-50.4719	5.73444	0	-0.248219	0	0	-23.3398		0.210682	-7020.62	-8315.56	4062.78	-127.525	-548.822	-24.1222	-6.63521	-1415.97		-644.755	-68.1148	-50.4719	5.73444	0	-0.248219	0	0	-23.3398
370	Complex_1	-24.5562	8.39889	3.13882	-3.40999	-4.91405	-0.746892	0	1.65876		-28.6818	3.77292	0.114741	3.13882	0	-0.00134132	0	0	-0.53246		1.05316	-67.9754	-49.7841	5.74628	0	-0.248287	0	0	-23.8696		0.180375	-7020.58	-8278.96	4037.93	-126.869	-556.259	-22.809	-6.3179	-1427.54		-639.766	-67.9754	-49.7841	5.74628	0	-0.248287	0	0	-23.8696
371	Complex_1	-27.069	2.7466	2.0284	-3.52219	-4.40224	-1.60125	0	5.66417		-27.9825	1.76651	-1.16791	2.0284	0	0.00664752	0	0	0.953383		-0.0540194	-68.2461	-50.4725	5.73479	0	-0.248237	0	0	-23.4715		0.211271	-6898.66	-8342.81	4130.04	-125.547	-557.948	-27.1227	-11.2437	-1391.98		-572.048	-68.2461	-50.4725	5.73479	0	-0.248237	0	0	-23.4715
372	Complex_1	-26.6069	0.913315	2.74605	-3.63958	-4.54873	-0.467117	0	3.52837		-25.1392	2.68874	-1.0568	2.74605	0	0.0187437	0	0	0.862417		0.118325	-68.1061	-50.4791	5.73668	0	-0.248123	0	0	-23.3265		0.210929	-6940.71	-8302.8	4136.6	-126.019	-544.963	-31.8834	-8.07967	-1420.83		-642.732	-68.1061	-50.4791	5.73668	0	-0.248123	0	0	-23.3265
373	Complex_1	-29.1334	1.99516	1.8634	-4.00283	-4.02836	-0.657398	0	1.98693		-26.2903	1.3647	-2.01804	1.8634	0	0.00337005	0	0	1.41721		0.0987601	-67.9389	-49.7738	5.74101	0	-0.248327	0	0	-23.8397		0.181917	-7072.61	-8296.13	3985.76	-124.982	-563.004	-28.4757	-12.1577	-1444.23		-589.385	-67.9389	-49.7738	5.74101	0	-0.248327	0	0	-23.8397
374	Complex_1	-25.2675	1.34768	2.11416	-3.49378	-4.13948	-0.174052	0	4.69125		-25.6133	2.30341	-1.84852	2.11416	0	0.00170447	0	0	1.30647		0.729597	-68.1118	-50.4773	5.73444	0	-0.248254	0	0	-23.3331		0.212421	-6966.63	-8316.1	4139.25	-128.983	-562.244	-29.8808	-10.0178	-1419.6		-639.057	-68.1118	-50.4773	5.73444	0	-0.248254	0	0	-23.3331
375	Complex_1	9.09495e-12	-3.63798e-12	1.36424e-12	0	0	0	0	1.40972e-11		1.13687e-13	0	0	0	0	0	0	0	0		0	-68.1162	-50.4786	5.73437	0	-0.248239	0	0	-23.3359		0.212268	-7004.75	-8358.46	4064.63	-124.625	-559.025	-29.0121	-17.4931	-1389.55		-591.211	-68.1162	-50.4786	5.73437	0	-0.248239	0	0	-23.3359
376	Complex_1	-26.8397	-3.52929	2.54864	-4.29344	-3.91879	-0.761165	0	5.91238		-22.798	2.45859	-1.301	2.54864	0	0.00553487	0	0	0.831858		0.373555	-68.0163	-50.4828	5.73477	0	-0.248323	0	0	-23.2363		0.216341	-6977.16	-8324.93	4069.44	-129.649	-554.858	-28.8257	-7.96776	-1411.84		-588.533	-68.0163	-50.4828	5.73477	0	-0.248323	0	0	-23.2363
377	Complex_1	-27.6303	6.96519	2.80353	-3.61075	-3.99126	-0.538491	0	0.401105		-29.6596	2.79106	-0.140684	2.80353	0	-0.000118462	0	0	-0.526572		0.654902	-67.955	-49.7819	5.73921	0	-0.24838	0	0	-23.8491		0.1851	-6963.3	-8285.45	4068.93	-125.876	-558.372	-24.7708	-12.9676	-1415.43		-609.367	-67.955	-49.7819	5.73921	0	-0.24838	0	0	-23.8491
378	Complex_1	-23.3948	4.16522	3.68227	-3.60267	-4.04162	-0.467395	0	3.07604		-26.2066	3.52418	-2.08703	3.68227	0	0.00778641	0	0	1.53943		0.381732	-68.0838	-50.4813	5.73408	0	-0.248296	0	0	-23.3038		0.215549	-7062.72	-8285.5	3998.92	-124.873	-550.868	-26.9415	-8.30697	-1414.97		-650.182	-68.0838	-50.4813	5.73408	0	-0.248296	0	0	-23.3038
379	Complex_1	-27.5513	3.4131	1.64021	-3.39813	-4.75328	-0.528834	0	4.43533		-28.3597	1.27989	-0.595952	1.64021	0	0.0013897	0	0	0.218297		0.015944	-68.0189	-50.4884	5.7359	0	-0.248242	0	0	-23.2309		0.212634	-6983.97	-8338.72	4090.83	-124.995	-555.856	-23.8997	-7.27986	-1419.77		-604.279	-68.0189	-50.4884	5.7359	0	-0.248242	0	0	-23.2309
380	Complex_1	-21.1153	0.877577	1.53276	-3.9103	-3.3394	-0.0658619	0	3.45584		-19.6659	2.0159	-1.73171	1.53276	0	-0.00611034	0	0	1.25768		0.963277	-68.0358	-50.4771	5.73273	0	-0.248242	0	0	-23.2548		0.211643	-7018.19	-8306.81	4015.7	-126.266	-561.886	-26.2193	-6.13814	-1427.71		-578.859	-68.0358	-50.4771	5.73273	0	-0.248242	0	0	-23.2548
381	Complex_1	-21.1423	1.47283	2.94131	-3.80375	-3.67018	-0.0728616	0	2.80036		-20.81	3.45617	-2.62264	2.94131	0	-0.00524028	0	0	1.81488		1.32786	-68.157	-50.4754	5.736	0	-0.248229	0	0	-23.3799		0.210576	-7093.91	-8261.75	3968.48	-125.136	-546.979	-27.3416	-16.2444	-1468.29		-616.65	-68.157	-50.4754	5.736	0	-0.248229	0	0	-23.3799
382	Complex_1	-23.3733	3.28627	1.86959	-3.63512	-4.6203	-0.0975408	0	4.54186		-24.7181	2.07805	-1.4419	1.86959	0	0.00808948	0	0	1.13812		0.504154	-68.0379	-50.4879	5.73775	0	-0.248192	0	0	-23.2536		0.213992	-6937.19	-8265.32	4081.79	-128.442	-545.439	-25.3775	-20.8409	-1417.83		-615.729	-68.0379	-50.4879	5.73775	0	-0.248192	0	0	-23.2536
383	Complex_1	-23.2966	3.27702	3.3369	-3.17591	-4.08187	-0.961171	0	4.20241		-25.894	3.89204	-1.11791	3.3369	0	-0.000912698	0	0	0.851134		0.822822	-68.0903	-49.7773	5.74059	0	-0.248355	0	0	-23.9889		0.183548	-7084.9	-8263.94	4015.29	-127.667	-557.101	-23.5212	-10.88	-1436.39		-680.693	-68.0903	-49.7773	5.74059	0	-0.248355	0	0	-23.9889
384	Complex_1	-20.7494	2.45125	2.41655	-3.36435	-4.52835	-0.568977	0	3.8744		-21.0299	3.23687	-1.82183	2.41655	0	-0.00758285	0	0	1.07668		1.57306	-68.0913	-50.4857	5.73229	0	-0.248314	0	0	-23.3088		0.219205	-7014.87	-8292.12	4028.47	-123.847	-558.878	-26.2698	-13.6151	-1431.96		-596.643	-68.0913	-50.4857	5.73229	0	-0.248314	0	0	-23.3088
385	Complex_1	-24.9516	4.17354	1.66528	-2.87727	-4.25363	-0.883268	0	2.16362		-24.9399	1.39496	-1.05097	1.66528	0	0.00299205	0	0	0.502774		0.274887	-68.0663	-50.4763	5.73393	0	-0.248224	0	0	-23.2876		0.211834	-7068.45	-8323.9	4022.66	-126.079	-556.695	-28.8468	-5.97062	-1408.41		-641.211	-68.0663	-50.4763	5.73393	0	-0.248224	0	0	-23.2876
386	Complex_1	-21.8969	6.71115	3.90727	-3.92577	-4.01704	-0.412798	0	0.142982		-24.3027	4.14846	-1.83353	3.90727	0	-0.000925166	0	0	1.39612		0.679524	-67.9787	-49.7894	5.74402	0	-0.248328	0	0	-23.871		0.186019	-7123.54	-8281.16	4025.58	-124.271	-555.23	-25.8005	-7.00529	-1450.9		-704.746	-67.9787	-49.7894	5.74402	0	-0.248328	0	0	-23.871
387	Complex_1	-0.105584	1.37218	0.000374023	0	5.29348e-06	0	0	-1.47695		-0.00119203	-0.0622266	0.00172498	0.000374023	0	5.29348e-06	0	0	-0.0636997		-0.000631157	-65.8642	-53.6152	8.23737	0	-0.247029	0	0	-21.4216		1.18228	-6998.78	-8347.99	4081.48	-121.996	-551.136	-22.9366	-9.72443	-1421.65		-604.833	-65.8642	-53.6152	8.23737	0	-0.247029	0	0	-21.4216
388	Complex_1	-0.0519584	1.4478	9.01055e-05	0	-1.01485e-05	0	0	-1.49755		-0.00229427	2.70937e-05	0.000269014	9.01055e-05	0	-1.01485e-05	0	0	0.00135173		-0.00167361	-65.8927	-53.6155	8.23791	0	-0.247029	0	0	-21.4511		1.18309	-7073.63	-8321.28	4055.57	-125.637	-557.411	-23.3334	-10.6848	-1414.88		-675.975	-65.8927	-53.6155	8.23791	0	-0.247029	0	0	-21.4511
389	Complex_1	-0.0491022	1.51074	0.000669525	0	4.24007e-06	0	0	-1.55922		-0.00129058	0.00330342	0.000500274	0.000669525	0	4.24007e-06	0	0	0.00278891		-0.000659527	-68.0325	-50.4827	5.73359	0	-0.248291	0	0	-23.2462		0.211128	-7038.21	-8301.17	4090.43	-122.699	-558.069	-24.3958	-12.3004	-1435.75		-674.256	-68.0325	-50.4827	5.73359	0	-0.248291	0	0	-23.2462
390	Complex_1	-0.130044	1.48748	0.00130501	0	2.15228e-05	0	0	-1.61753		-0.00131657	-0.0768449	-0.00101613	0.00130501	0	2.15228e-05	0	0	-0.0765252		-0.00063013	-67.9425	-49.773	5.74264	0	-0.248323	0	0	-23.8439		0.179994	-7024.99	-8323.78	3984.31	-119.718	-538.485	-21.898	-11.9534	-1420.52		-572.951	-67.9425	-49.773	5.74264	0	-0.248323	0	0	-23.8439
391	Complex_1	-0.0767772	1.44276	-0.000287501	0	-2.72505e-05	0	0	-1.52284		0.00361977	-0.0251265	-0.0102967	-0.000287501	0	-2.72505e-05	0	0	-0.0187624		0.00424736	-68.0268	-49.7667	5.74034	0	-0.248312	0	0	-23.9321		0.179936	-7112.9	-8351.46	3954.4	-122.377	-547.876	-24.882	-10.3538	-1405.21		-605.146	-68.0268	-49.7667	5.74034	0	-0.248312	0	0	-23.9321
392	Complex_1	-23.7397	-4.11264	3.55022	-4.15093	-3.79317	-0.263708	0	4.86655		-19.836	3.92094	-2.91397	3.55022	0	-0.0018523	0	0	2.067		1.21955	-68.1508	-50.4853	5.7344	0	-0.248245	0	0	-23.3675		0.215914	-7081.01	-8364.96	3998.8	-132.404	-563.741	-25.789	-11.2495	-1423.55		-558.111	-68.1508	-50.4853	5.7344	0	-0.248245	0	0	-23.3675
393	Complex_1	-22.6688	6.29974	2.15122	-4.09795	-4.25854	-0.27876	0	-0.418627		-22.0659	2.77321	-1.64636	2.15122	0	-0.00508752	0	0	1.27119		1.00225	-68.0244	-49.7725	5.73746	0	-0.248375	0	0	-23.9243		0.183316	-6993.87	-8307.36	4076.36	-132.367	-558.877	-26.9746	-13.054	-1439.81		-591.783	-68.0244	-49.7725	5.73746	0	-0.248375	0	0	-23.9243
394	Complex_1	-29.8418	3.86484	1.25446	-3.4374	-4.30993	-0.815345	0	3.00689		-29.4053	0.921858	-0.903478	1.25446	0	0.00403221	0	0	0.519343		0.0475039	-68.1096	-50.4746	5.73355	0	-0.248238	0	0	-23.3326		0.212272	-7037.29	-8309.91	4035.22	-130.36	-547.044	-23.9853	-8.98634	-1430.66		-621.556	-68.1096	-50.4746	5.73355	0	-0.248238	0	0	-23.3326
395	Complex_1	-27.6851	0.351153	1.50756	-3.78384	-4.74823	-0.348537	0	4.23903		-24.9022	1.65292	-1.34925	1.50756	0	-0.00352556	0	0	1.00612		0.492007	-68.1611	-50.4915	5.73227	0	-0.248314	0	0	-23.3719		0.218295	-7063.31	-8307.22	4077.29	-124.055	-555.638	-28.4734	-9.45783	-1426.82		-688.93	-68.1611	-50.4915	5.73227	0	-0.248314	0	0	-23.3719
396	Complex_1	1.90994e-11	1.09139e-11	4.54747e-13	0	-1.13687e-13	0	0	9.32232e-12		1.13687e-13	0	0	0	0	0	0	0	0		0	-68.077	-50.4869	5.73395	0	-0.248261	0	0	-23.2921		0.216263	-6999.53	-8260.65	4100.94	-120.535	-557.88	-24.4943	-7.3625	-1438.12		-691.425	-68.077	-50.4869	5.73395	0	-0.248261	0	0	-23.2921
397	Complex_1	0.00168139	0.327055	1.71731e-05	0	-1.17014e-06	0	0	-0.32493		-0.000459615	0.00425928	0.00156653	1.71731e-05	0	-1.17014e-06	0	0	0.003119		-0.000442249	-68.1934	-50.4777	5.73458	0	-0.248277	0	0	-23.414		0.212091	-7095.06	-8299.24	4000.65	-121.616	-560.674	-28.9488	-11.3459	-1429.97		-643.911	-68.1934	-50.4777	5.73458	0	-0.248277	0	0	-23.414
398	Complex_1	-0.00523148	0.378615	-0.000129427	0	2.75791e-06	0	0	-0.382959		-0.000761233	-0.00525924	0.00207833	-0.000129427	0	2.75791e-06	0	0	-0.00646522		-0.000745683	-68.1353	-49.7674	5.74107	0	-0.248319	0	0	-24.0408		0.180107	-7070.4	-8258.72	3990.74	-120.258	-557.696	-27.9879	-10.2967	-1448.04		-638.15	-68.1353	-49.7674	5.74107	0	-0.248319	0	0	-24.0408
399	Complex_1	-24.3789	5.22259	1.92601	-3.08522	-3.80695	-0.0249616	0	1.12779		-25.7381	1.61432	-0.924688	1.92601	0	0.000281984	0	0	0.598346		0.0143708	-68.1421	-50.4738	5.73477	0	-0.248226	0	0	-23.366		0.21127	-7067.56	-8346.32	4058.63	-125.732	-557.746	-28.068	-7.75005	-1405.73		-654.84	-68.1421	-50.4738	5.73477	0	-0.248226	0	0	-23.366
400	Complex_1	-23.5984	2.67144	1.03994	-3.93608	-3.85089	-0.0360992	0	2.60149		-22.0882	1.11935	-1.12864	1.03994	0	-0.00243467	0	0	0.87682		0.333662	-68.1512	-50.4806	5.73497	0	-0.248227	0	0	-23.3703		0.212988	-6887.22	-8357.05	4168.61	-124.667	-553.277	-26.3458	-7.10162	-1432.89		-554.499	-68.1512	-50.4806	5.73497	0	-0.248227	0	0	-23.3703
401	Complex_1	-23.3192	0.614002	2.49658	-3.39847	-4.14852	-0.318233	0	4.35025		-22.9148	3.09434	-0.295343	2.49658	0	0.00489372	0	0	0.540624		0.347586	-68.035	-49.7708	5.74365	0	-0.248249	0	0	-23.9373		0.177769	-6994.35	-8301.34	4155.15	-120.379	-563.114	-24.1758	-5.42107	-1416.87		-718.199	-68.035	-49.7708	5.74365	0	-0.248249	0	0	-23.9373
402	Complex_1	-28.5454	2.72176	1.58883	-3.77045	-4.63528	-0.485726	0	1.4771		-25.4416	1.73916	-0.295543	1.58883	0	0.00186484	0	0	0.0734188		0.370593	-67.935	-49.7821	5.73435	0	-0.2484	0	0	-23.8288		0.189894	-7034.55	-8290.08	4044.42	-121.492	-564.511	-26.6567	-11.7566	-1412.81		-651.661	-67.935	-49.7821	5.73435	0	-0.2484	0	0	-23.8288
403	Complex_1	-21.3922	0.371394	2.54224	-3.3944	-3.65922	-0.0854397	0	5.47573		-22.6425	2.37279	-2.77498	2.54224	0	-0.000102855	0	0	1.95891		0.646721	-68.0417	-49.792	5.74149	0	-0.248431	0	0	-23.9308		0.188035	-7008.7	-8296.77	4036.29	-124.947	-568.226	-25.7144	-11.8809	-1426.15		-591.291	-68.0417	-49.792	5.74149	0	-0.248431	0	0	-23.9308
404	Complex_1	-24.8776	2.20718	1.69579	-3.70903	-4.15017	-0.501194	0	2.95647		-23.3767	1.44874	-1.08302	1.69579	0	-0.00156831	0	0	0.485592		0.351938	-67.9829	-50.4822	5.73402	0	-0.248257	0	0	-23.2009		0.214367	-7000.07	-8332.52	4086.87	-128.369	-560.686	-24.3041	-10.8117	-1418.9		-611.354	-67.9829	-50.4822	5.73402	0	-0.248257	0	0	-23.2009
405	Complex_1	-31.1808	-0.915582	0.886479	-2.9661	-4.74599	-0.16356	0	3.74862		-27.0247	0.975967	0.544785	0.886479	0	0.00682995	0	0	-0.376237		-0.0858901	-68.0218	-49.7776	5.74202	0	-0.248348	0	0	-23.9211		0.183146	-6912.06	-8260.56	4077.95	-123.404	-545.665	-23.2954	-10.0375	-1471.12		-555.926	-68.0218	-49.7776	5.74202	0	-0.248348	0	0	-23.9211
406	Complex_1	-26.3292	6.76522	2.67566	-1.84558	-5.00149	-0.106742	0	-0.0730929		-28.7431	2.89678	0.709654	2.67566	0	-0.00141047	0	0	-1.38097		0.893849	-68.1814	-50.4701	5.73531	0	-0.248239	0	0	-23.4079		0.209534	-6888.23	-8238.05	4120.54	-121.885	-556.459	-25.0569	-9.94448	-1453.23		-604.15	-68.1814	-50.4701	5.73531	0	-0.248239	0	0	-23.4079
407	Complex_1	-24.0513	1.14944	2.30812	-2.6515	-3.96174	-0.269513	0	0.526866		-21.153	2.43097	-1.47826	2.30812	0	0.00463707	0	0	0.942542		0.653923	-67.9112	-49.7754	5.74031	0	-0.248352	0	0	-23.811		0.183213	-7024.26	-8296.31	4062.03	-119.171	-557.157	-26.5032	-12.1343	-1423.29		-651.73	-67.9112	-49.7754	5.74031	0	-0.248352	0	0	-23.811
408	Complex_1	-21.8597	5.27531	2.58477	-2.76403	-4.09636	-0.00583827	0	1.13275		-23.9863	2.45218	-2.29007	2.58477	0	0.00567695	0	0	1.82918		0.322628	-68.0572	-49.7823	5.74496	0	-0.248267	0	0	-23.9518		0.180248	-6917.05	-8260.24	4107.06	-124.623	-557.737	-27.0315	-12.0703	-1446.51		-595.897	-68.0572	-49.7823	5.74496	0	-0.248267	0	0	-23.9518
409	Complex_1	-26.1145	0.0588345	1.10766	-2.62661	-3.66384	-0.0425069	0	2.07151		-23.0195	1.06776	0.11558	1.10766	0	-0.00388688	0	0	-0.39057		0.238969	-67.9121	-49.7806	5.74087	0	-0.248355	0	0	-23.8086		0.184616	-7014.04	-8299.22	4003.48	-126.616	-553.104	-24.5656	-11.2275	-1386.32		-616.468	-67.9121	-49.7806	5.74087	0	-0.248355	0	0	-23.8086
410	Complex_1	-27.1653	-3.73667	1.39784	-3.44349	-4.083	-0.625274	0	7.72613		-24.4008	1.67978	-0.886978	1.39784	0	0.00830194	0	0	0.803211		0.357401	-68.0852	-49.7548	5.74389	0	-0.248155	0	0	-23.9985		0.17236	-7054	-8341.35	3998.87	-127.266	-547.527	-23.8889	-10.7317	-1368.34		-633.769	-68.0852	-49.7548	5.74389	0	-0.248155	0	0	-23.9985
411	Complex_1	-0.0698079	1.52171	-0.000959144	0	-9.3687e-05	0	0	-1.59184		0.00137997	-0.00598925	-0.00234674	-0.000959144	0	-9.3687e-05	0	0	-0.00452706		0.00193739	-67.9917	-49.7693	5.74465	0	-0.248228	0	0	-23.8963		0.177474	-6959.05	-8283.37	4036.84	-120.663	-548.37	-26.2196	-6.13347	-1417.61		-593.526	-67.9917	-49.7693	5.74465	0	-0.248228	0	0	-23.8963
412	Complex_1	-0.0537785	1.53888	0.00321641	0	5.69764e-05	0	0	-1.59816		0.00222061	0.0148365	-0.0177537	0.00321641	0	5.69764e-05	0	0	0.0264158		0.00290096	-68.0174	-49.7716	5.74145	0	-0.248322	0	0	-23.9199		0.180983	-6916.87	-8351.98	4115.63	-126.26	-555.528	-26.6399	-6.20393	-1384.03		-581.861	-68.0174	-49.7716	5.74145	0	-0.248322	0	0	-23.9199
413	Complex_1	-0.0927717	1.39098	0.000443431	0	-4.8043e-05	0	0	-1.48481		0.00066425	-0.0373992	-0.00277057	0.000443431	0	-4.8043e-05	0	0	-0.0362628		0.00123883	-68.0523	-49.7762	5.74052	0	-0.248363	0	0	-23.9521		0.183865	-7040.74	-8243.99	4024.4	-122.59	-549.555	-22.3071	-5.46592	-1467.96		-653.275	-68.0523	-49.7762	5.74052	0	-0.248363	0	0	-23.9521
414	Complex_1	-18.2834	0.566125	3.4004	-3.89687	-3.74238	-0.0606193	0	5.08915		-19.6392	3.81345	-1.08795	3.4004	0	0.00124845	0	0	0.609192		0.890563	-67.9691	-49.7749	5.74643	0	-0.248264	0	0	-23.8702		0.177882	-6944.74	-8324.89	4070.96	-130.36	-559.355	-27.1871	-7.3309	-1387.35		-579.223	-67.9691	-49.7749	5.74643	0	-0.248264	0	0	-23.8702
415	Complex_1	-2.00089e-11	1.81899e-12	-4.54747e-13	0	0	0	0	-2.02363e-11		2.27374e-13	0	0	0	0	0	0	0	0		0	-67.9888	-49.7804	5.7407	0	-0.248391	0	0	-23.8852		0.184447	-7035.65	-8253.47	4061.01	-120.946	-562.156	-25.479	-8.11371	-1458.04		-668.456	-67.9888	-49.7804	5.7407	0	-0.248391	0	0	-23.8852
416	Complex_1	-1.90994e-11	-9.09495e-12	-4.54747e-13	0	0	0	0	-1.59162e-12		1.13687e-13	0	0	0	0	0	0	0	0		0	-68.1484	-49.7747	5.7414	0	-0.24831	0	0	-24.0491		0.18234	-6992.07	-8265.72	4035.93	-122.209	-557.458	-22.7618	-8.05293	-1457.71		-594.101	-68.1484	-49.7747	5.7414	0	-0.24831	0	0	-24.0491
417	Complex_1	-23.3533	1.72034	2.17509	-3.70105	-4.58911	-0.494189	0	2.92189		-21.3863	3.33835	-1.06373	2.17509	0	0.000567393	0	0	0.833971		1.39244	-67.9327	-49.7729	5.74081	0	-0.248321	0	0	-23.8337		0.181466	-7034.83	-8295.67	4012.9	-128.53	-553.038	-21.8811	-8.22084	-1424.48		-615.91	-67.9327	-49.7729	5.74081	0	-0.248321	0	0	-23.8337
418	Complex_1	-24.7734	0.574337	2.57675	-3.76765	-4.7965	-0.269671	0	3.23387		-22.3246	3.3738	-1.92332	2.57675	0	-0.00584612	0	0	1.36416		1.36205	-67.9409	-49.7837	5.74103	0	-0.248353	0	0	-23.8354		0.185448	-7077.02	-8283.59	4006.04	-127.821	-556.874	-24.0658	-8.59057	-1399.52		-682.593	-67.9409	-49.7837	5.74103	0	-0.248353	0	0	-23.8354
419	Complex_1	-25.239	-0.390685	2.23409	-3.76136	-4.02292	-0.0375034	0	2.33942		-21.6001	2.41534	-0.766191	2.23409	0	-0.00634468	0	0	0.618551		0.335238	-68.0475	-50.4836	5.7382	0	-0.248145	0	0	-23.2639		0.210015	-7021.5	-8248.07	4010.76	-124.896	-564.176	-23.386	-8.37622	-1453.88		-609.475	-68.0475	-50.4836	5.7382	0	-0.248145	0	0	-23.2639
420	Complex_1	-28.8035	5.22187	0.725783	-3.42267	-4.49009	-0.133773	0	0.61892		-27.3235	0.575867	-1.37395	0.725783	0	-0.0029519	0	0	1.08973		0.137254	-68.0522	-49.7902	5.74077	0	-0.248367	0	0	-23.9434		0.188998	-7067.28	-8258.54	3995.32	-127.162	-554.584	-25.2	-7.28234	-1445.66		-644.162	-68.0522	-49.7902	5.74077	0	-0.248367	0	0	-23.9434
421	Complex_1	-23.6412	1.19536	2.35254	-3.99333	-4.09949	-0.501953	0	2.90045		-21.4947	3.45816	-2.34166	2.35254	0	-0.00527683	0	0	1.78821		1.66435	-68.1935	-50.4729	5.73388	0	-0.248284	0	0	-23.4187		0.212405	-7049.63	-8326.89	4007.9	-130.37	-556.464	-29.7979	-8.50805	-1388.44		-617.064	-68.1935	-50.4729	5.73388	0	-0.248284	0	0	-23.4187
422	Complex_1	-29.2348	1.04446	0.941775	-3.49771	-4.32821	-0.797104	0	3.10153		-25.6995	0.874948	-0.627848	0.941775	0	0.00309727	0	0	0.344395		0.213528	-67.9556	-49.7888	5.74266	0	-0.248346	0	0	-23.8467		0.185685	-6912.23	-8304.42	4134.51	-127.096	-553.643	-30.7519	-6.34592	-1396.7		-627.785	-67.9556	-49.7888	5.74266	0	-0.248346	0	0	-23.8467
423	Complex_1	-26.0454	-0.1335	1.34376	-3.9398	-3.95518	-0.133126	0	5.77959		-25.0072	1.64956	-1.36065	1.34376	0	-0.000929328	0	0	1.03724		0.630147	-67.9702	-49.7714	5.74089	0	-0.248311	0	0	-23.872		0.180706	-6977.51	-8287.34	4059.78	-128.652	-553.699	-25.5531	-7.63147	-1423.16		-611.256	-67.9702	-49.7714	5.74089	0	-0.248311	0	0	-23.872
424	Complex_1	-25.8364	-0.154006	2.14628	-3.91856	-3.83435	-0.425843	0	5.494		-25.1439	2.22323	-1.88823	2.14628	0	0.00563863	0	0	1.35445		0.60509	-68.0097	-50.4721	5.73556	0	-0.248224	0	0	-23.2343		0.209389	-7006.48	-8260.11	4022.59	-130.749	-554.009	-30.6003	-15.9297	-1453.96		-583.718	-68.0097	-50.4721	5.73556	0	-0.248224	0	0	-23.2343
425	Complex_1	-21.3305	2.10515	1.41844	-4.31719	-3.00514	-0.0236876	0	3.70121		-21.2093	0.984759	-0.945999	1.41844	0	0.00183924	0	0	0.672652		-0.162172	-68.1257	-50.4774	5.73362	0	-0.24828	0	0	-23.3472		0.213627	-7014.17	-8249.87	4050.16	-124.115	-556.124	-29.4116	-18.2378	-1424.31		-662.259	-68.1257	-50.4774	5.73362	0	-0.24828	0	0	-23.3472
426	Complex_1	-23.1618	0.410365	2.1203	-3.83027	-3.79316	-0.132914	0	6.28524		-24.2213	2.48465	-2.11417	2.1203	0	0.00102686	0	0	1.59678		0.880717	-68.0965	-50.4707	5.73438	0	-0.248231	0	0	-23.3222		0.210242	-6997.12	-8341.79	4020.07	-125.984	-557.866	-21.313	-17.1296	-1365.95		-587.171	-68.0965	-50.4707	5.73438	0	-0.248231	0	0	-23.3222
427	Complex_1	-25.1869	-0.7527	2.09614	-3.63344	-3.84045	-0.189894	0	3.54254		-22.4091	2.41206	-2.19348	2.09614	0	-0.00191933	0	0	1.51696		0.994364	-68.111	-50.4733	5.7339	0	-0.248249	0	0	-23.3353		0.211888	-7144.9	-8282.58	3959.86	-124.255	-552.578	-22.212	-14.7928	-1413.55		-694.782	-68.111	-50.4733	5.7339	0	-0.248249	0	0	-23.3353
428	Complex_1	-20.9264	3.07266	2.80893	-3.83133	-4.10925	-0.0153874	0	3.10642		-21.9584	3.61416	-2.04348	2.80893	0	-0.00547756	0	0	1.45498		1.3992	-68.0936	-49.7748	5.74067	0	-0.248354	0	0	-23.9935		0.182336	-7018.27	-8328.15	4076.17	-129.343	-556.528	-25.614	-11.9059	-1381.48		-661.422	-68.0936	-49.7748	5.74067	0	-0.248354	0	0	-23.9935
429	Complex_1	-0.00399482	0.029473	0.000739996	0	-2.77311e-05	0	0	-0.0344975		0.000317379	-0.00337987	-0.000700533	0.000739996	0	-2.77311e-05	0	0	-0.0037771		0.000385503	-68.1181	-50.4771	5.73275	0	-0.248226	0	0	-23.3382		0.212771	-7017.29	-8263.69	4054.99	-120.774	-562.505	-25.7033	-10.8787	-1441.68		-647.04	-68.1181	-50.4771	5.73275	0	-0.248226	0	0	-23.3382
430	Complex_1	0.000390812	-0.0288951	1.45391e-05	0	7.48528e-07	0	0	0.0293268		-5.62262e-05	8.45916e-06	-1.02947e-06	1.45391e-05	0	7.48528e-07	0	0	1.49739e-05		-2.0773e-05	-67.9329	-49.7884	5.74441	0	-0.248353	0	0	-23.8257		0.185083	-7120.12	-8279.18	3921.03	-124.764	-561.118	-27.8017	-10.9201	-1440.42		-596.948	-67.9329	-49.7884	5.74441	0	-0.248353	0	0	-23.8257
431	Complex_1	0.00560444	1.48465	0.0010988	0	-6.48025e-06	0	0	-1.47871		-0.00142836	0.0380095	0.000895874	0.0010988	0	-6.48025e-06	0	0	0.0371252		-0.00110388	-68.038	-49.7755	5.73933	0	-0.248354	0	0	-23.9375		0.184053	-7054.36	-8253.95	4018.43	-122.62	-551.151	-19.8209	-7.38367	-1450.75		-667.105	-68.038	-49.7755	5.73933	0	-0.248354	0	0	-23.9375
432	Complex_1	-0.020211	1.39218	0.00125894	0	1.28624e-05	0	0	-1.41026		-0.00340216	0.0161248	0.00698767	0.00125894	0	1.28624e-05	0	0	0.0108813		-0.00301595	-68.0274	-49.7728	5.74246	0	-0.248305	0	0	-23.9291		0.180291	-7010.06	-8274.12	4081.68	-125.928	-557.541	-23.2717	-5.63825	-1445.25		-659.989	-68.0274	-49.7728	5.74246	0	-0.248305	0	0	-23.9291
433	Complex_1	-25.6497	0.777879	1.2655	-3.65793	-4.57064	-0.0664804	0	5.03615		-24.4342	1.45443	-0.271104	1.2655	0	-0.00186149	0	0	0.17828		0.283617	-67.8957	-49.7773	5.74011	0	-0.248347	0	0	-23.7945		0.184308	-6955.7	-8192.08	4044.61	-122.137	-559.191	-25.9722	-7.10044	-1442.82		-651.013	-67.8957	-49.7773	5.74011	0	-0.248347	0	0	-23.7945
434	Complex_1	-18.8464	1.32139	4.69735	-3.65616	-3.9892	-0.198623	0	6.52476		-23.546	5.73178	-1.3943	4.69735	0	-0.00759179	0	0	0.944662		1.49166	-68.0418	-49.7785	5.73841	0	-0.248345	0	0	-23.9396		0.186227	-6912.64	-8310.65	4071.94	-125.012	-552.121	-23.3612	-9.06394	-1385.49		-578.871	-68.0418	-49.7785	5.73841	0	-0.248345	0	0	-23.9396
435	Complex_1	-23.4523	4.1306	2.75184	-3.45606	-3.95277	-0.91979	0	3.64828		-25.6544	2.48054	-0.988848	2.75184	0	-0.000165354	0	0	0.406397		0.311321	-68.025	-50.4918	5.73496	0	-0.248262	0	0	-23.2365		0.216519	-7081.33	-8320.86	4004.79	-130.421	-562.807	-27.4748	-8.19227	-1403.56		-632.803	-68.025	-50.4918	5.73496	0	-0.248262	0	0	-23.2365
436	Complex_1	-25.3349	-0.205161	3.31024	-3.31221	-4.18519	-0.136787	0	4.28352		-25.0893	3.256	-1.86934	3.31024	0	0.0138974	0	0	1.36733		0.433872	-68.1234	-50.471	5.73459	0	-0.248236	0	0	-23.3498		0.211087	-7105.84	-8287.17	4029.42	-126.57	-547.985	-26.7272	-6.29268	-1434.19		-706.324	-68.1234	-50.471	5.73459	0	-0.248236	0	0	-23.3498
437	Complex_1	-23.1209	1.97205	2.65165	-2.77592	-4.73835	-0.714208	0	4.9079		-24.4241	2.57294	-1.52019	2.65165	0	0.00366863	0	0	1.08661		0.351199	-68.147	-50.4889	5.73547	0	-0.248264	0	0	-23.3611		0.215848	-6958.88	-8297.87	4084.34	-130.841	-562.699	-27.1697	-8.65246	-1426.81		-589.176	-68.147	-50.4889	5.73547	0	-0.248264	0	0	-23.3611
438	Complex_1	-25.3692	7.06233	1.7737	-2.41522	-4.38882	-0.676608	0	1.74646		-28.4711	1.49425	-0.871119	1.7737	0	0.00124973	0	0	0.538834		0.0515876	-68.0917	-50.4759	5.73682	0	-0.248255	0	0	-23.3143		0.209914	-6937.59	-8293.54	4054.1	-125.48	-549.086	-25.4009	-17.0606	-1407.33		-573.796	-68.0917	-50.4759	5.73682	0	-0.248255	0	0	-23.3143
439	Complex_1	-23.2894	3.29978	2.6991	-3.23042	-4.23693	-0.0657849	0	3.05984		-24.815	2.62626	-1.53846	2.6991	0	0.00240515	0	0	0.994139		0.469073	-68.0908	-50.4728	5.73372	0	-0.248242	0	0	-23.315		0.211586	-7064.36	-8292.85	4000.11	-125.389	-546.538	-21.5169	-12.785	-1405.66		-659.742	-68.0908	-50.4728	5.73372	0	-0.248242	0	0	-23.315
440	Complex_1	-23.555	-5.99545	3.46116	-3.18482	-4.32552	-0.396083	0	9.27132		-22.3856	3.21571	-1.76233	3.46116	0	0.00373535	0	0	1.1788		0.334337	-68.0808	-50.4799	5.73559	0	-0.248222	0	0	-23.2999		0.211573	-6966.34	-8287.53	4055.23	-124.604	-551.501	-25.0927	-16.1359	-1410.54		-606.167	-68.0808	-50.4799	5.73559	0	-0.248222	0	0	-23.2999
441	Complex_1	-24.6794	6.30905	1.07276	-4.13418	-4.2314	-0.216295	0	2.38926		-25.8686	1.52104	-0.0012032	1.07276	0	0.000949585	0	0	0.105237		0.343294	-67.9891	-49.7781	5.74196	0	-0.248313	0	0	-23.8876		0.182952	-6916.87	-8288.19	4083.88	-126.994	-546.452	-26.1459	-17.1171	-1399.77		-596.086	-67.9891	-49.7781	5.74196	0	-0.248313	0	0	-23.8876
442	Complex_1	-26.3309	3.71155	2.36415	-3.79568	-4.11934	-0.761514	0	3.64748		-27.3775	2.25806	-1.41721	2.36415	0	0.000849769	0	0	0.958083		0.352187	-68.0417	-50.4705	5.73452	0	-0.248208	0	0	-23.2675		0.210054	-7018.99	-8311.52	4022.03	-132.638	-548.308	-25.5697	-16.3812	-1368.01		-638.586	-68.0417	-50.4705	5.73452	0	-0.248208	0	0	-23.2675
443	Complex_1	-26.829	-4.04551	2.13341	-4.00471	-4.46783	-0.286382	0	6.96984		-23.1278	2.53502	-0.177815	2.13341	0	0.00720587	0	0	0.266535		0.305689	-68.0409	-49.7747	5.74161	0	-0.248348	0	0	-23.9411		0.181673	-6996.27	-8248.05	4035.11	-127.739	-550.125	-27.5535	-19.9216	-1407.95		-650.041	-68.0409	-49.7747	5.74161	0	-0.248348	0	0	-23.9411
444	Complex_1	0.000621834	1.79528	0.00140691	0	4.11705e-06	0	0	-1.79516		-0.000912201	0.0453252	-0.00210089	0.00140691	0	4.11705e-06	0	0	0.0464275		-0.000412374	-67.9225	-49.7801	5.73943	0	-0.248354	0	0	-23.8195		0.185991	-6924.83	-8301.23	3966.41	-126.831	-544.378	-27.5363	-15.7299	-1375.72		-499.811	-67.9225	-49.7801	5.73943	0	-0.248354	0	0	-23.8195
445	Complex_1	7.27596e-12	-1.81899e-12	0	0	0	0	0	1.00044e-11		2.27374e-13	0	0	0	0	0	0	0	0		0	-68.0146	-49.7988	5.74008	0	-0.248442	0	0	-23.9005		0.19309	-6991.36	-8301.24	4048.2	-125.954	-553.874	-26.7928	-19.2742	-1406.45		-605.972	-68.0146	-49.7988	5.74008	0	-0.248442	0	0	-23.9005
446	Complex_1	-1.18234e-11	3.63798e-12	-4.54747e-13	0	0	0	0	-1.36424e-11		-4.54747e-13	0	0	0	0	0	0	0	0		0	-68.0711	-49.7735	5.7422	0	-0.248345	0	0	-23.9728		0.181305	-6946.86	-8289.9	4060.55	-124.628	-544.094	-24.8607	-12.0431	-1412.33		-599.551	-68.0711	-49.7735	5.7422	0	-0.248345	0	0	-23.9728
447	Complex_1	-29.3689	1.84353	3.68891	-3.70443	-4.2466	-1.01626	0	2.45883		-28.3929	4.00636	-0.072732	3.68891	0	-0.00188232	0	0	-0.541565		0.933628	-68.0577	-49.7754	5.74053	0	-0.248326	0	0	-23.957		0.182456	-6998.77	-8269.37	4009.41	-130.877	-552.788	-26.2442	-9.42005	-1407.2		-612.277	-68.0577	-49.7754	5.74053	0	-0.248326	0	0	-23.957
448	Complex_1	-25.5509	-0.318848	3.27364	-3.84445	-4.67068	-0.731875	0	4.78653		-24.0452	3.78396	-1.08988	3.27364	0	-0.00380099	0	0	1.02773		0.576266	-68.1223	-50.4726	5.73495	0	-0.248272	0	0	-23.3481		0.211636	-7064.27	-8317.16	3961.09	-132.404	-547.046	-24.456	-13.3323	-1410.3		-580.663	-68.1223	-50.4726	5.73495	0	-0.248272	0	0	-23.3481
449	Complex_1	-23.4436	0.189137	1.56838	-3.84867	-4.25672	-0.0279942	0	5.02975		-22.0975	2.53257	-0.779949	1.56838	0	-0.00437529	0	0	0.728493		1.02002	-68.026	-49.7776	5.73777	0	-0.248385	0	0	-23.9228		0.185115	-6956.85	-8290.32	4028.92	-128.865	-544.342	-21.3411	-8.68988	-1409.93		-582.283	-68.026	-49.7776	5.73777	0	-0.248385	0	0	-23.9228
450	Complex_1	-23.5571	-0.965389	1.46927	-4.06041	-3.49393	-0.177247	0	5.57267		-21.9021	1.99852	0.318848	1.46927	0	0.00123584	0	0	-0.127349		0.336515	-67.8811	-49.7715	5.74097	0	-0.248331	0	0	-23.7831		0.180971	-6969.94	-8302.85	4078.05	-130.939	-559.268	-21.8273	-14.7871	-1410.1		-608.211	-67.8811	-49.7715	5.74097	0	-0.248331	0	0	-23.7831
451	Complex_1	-24.5511	1.93071	1.72938	-4.17982	-3.49053	-0.0421112	0	2.88311		-23.3819	1.36733	-1.49384	1.72938	0	-0.000628398	0	0	1.00626		0.126151	-68.0244	-50.4837	5.73393	0	-0.248275	0	0	-23.242		0.215616	-6918.5	-8271.87	4103.92	-128.705	-560.853	-21.327	-10.3435	-1426.06		-603.264	-68.0244	-50.4837	5.73393	0	-0.248275	0	0	-23.242
452	Complex_1	-23.9712	1.97646	2.40985	-3.6323	-4.62382	-0.560386	0	5.0645		-24.6055	2.40961	-1.28691	2.40985	0	-0.00252971	0	0	0.996933		0.292261	-67.9772	-50.4807	5.73434	0	-0.24826	0	0	-23.196		0.213347	-6914.71	-8264.84	4100.83	-125.337	-554.392	-21.8749	-8.51196	-1433.63		-606.952	-67.9772	-50.4807	5.73434	0	-0.24826	0	0	-23.196
453	Complex_1	-24.7825	2.69545	1.79766	-3.45173	-4.20259	-0.609713	0	5.75543		-26.767	1.26345	-1.47445	1.79766	0	0.0010545	0	0	0.947172		-0.00798964	-67.9642	-50.477	5.73396	0	-0.248244	0	0	-23.1859		0.21296	-7017.9	-8293.12	4036.52	-127.175	-559.86	-26.792	-6.28359	-1417.08		-624.099	-67.9642	-50.477	5.73396	0	-0.248244	0	0	-23.1859
454	Complex_1	-24.7616	1.38364	2.65526	-3.76923	-3.78272	-0.545883	0	3.44173		-24.1444	2.48433	-2.09298	2.65526	0	0.00661414	0	0	1.42454		0.490891	-67.9685	-50.4699	5.72874	0	-0.24832	0	0	-23.1947		0.215712	-7009.83	-8318.12	4047.53	-128.017	-550.234	-24.6746	-11.7211	-1374.72		-649.876	-67.9685	-50.4699	5.72874	0	-0.24832	0	0	-23.1947
455	Complex_1	-26.0042	-3.37296	2.30198	-3.5805	-3.81726	-0.825291	0	7.83338		-24.5435	2.14097	-1.68849	2.30198	0	-0.00197214	0	0	1.1313		0.398141	-67.9661	-50.4927	5.73708	0	-0.248239	0	0	-23.179		0.216643	-6997.62	-8276.32	4039.81	-128.969	-549.975	-23.1792	-11.1818	-1417.17		-630.633	-67.9661	-50.4927	5.73708	0	-0.248239	0	0	-23.179
456	Complex_1	0.000889259	3.35544	-0.000140866	0	5.6939e-06	0	0	-3.34925		-0.0051605	0.00771705	0.0079967	-0.000140866	0	5.6939e-06	0	0	0.00380593		-0.00395041	-68.0095	-49.7975	5.7409	0	-0.24838	0	0	-23.8951		0.190562	-6978.85	-8303.52	4091.86	-123.386	-559.232	-23.8427	-4.68466	-1423.99		-632.063	-68.0095	-49.7975	5.7409	0	-0.24838	0	0	-23.8951
457	Complex_1	1.09139e-11	-3.63798e-12	0	0	0	0	0	1.20508e-11		-6.82121e-13	0	0	0	0	0	0	0	0		0	-68.0889	-49.7764	5.74407	0	-0.24821	0	0	-23.9883		0.179888	-6963.98	-8289.2	3983.24	-124.568	-549.355	-23.0135	-10.4587	-1396.65		-553.973	-68.0889	-49.7764	5.74407	0	-0.24821	0	0	-23.9883
458	Complex_1	0	5.45697e-12	4.54747e-13	0	0	0	0	-6.13909e-12		4.54747e-13	0	0	0	0	0	0	0	0		0	-67.9731	-49.7804	5.73874	0	-0.248305	0	0	-23.8673		0.184151	-7049.63	-8347.31	4008.67	-125.365	-555.494	-26.0738	-10.3175	-1393.23		-600.503	-67.9731	-49.7804	5.73874	0	-0.248305	0	0	-23.8673
459	Complex_1	0.0698717	3.06115	-0.00144385	0	-0.000137849	0	0	-2.99071		0.00101283	0.078286	0.000922618	-0.00144385	0	-0.000137849	0	0	0.0767238		0.00222121	-68.0065	-50.4842	5.73605	0	-0.248154	0	0	-23.2234		0.213251	-6922.85	-8337.05	4145.56	-127.945	-552.728	-26.4414	-7.65176	-1384.7		-631.901	-68.0065	-50.4842	5.73605	0	-0.248154	0	0	-23.2234
460	Complex_1	-27.591	1.19155	1.62311	-3.60211	-4.38493	-0.666432	0	3.54895		-25.3011	1.24279	-1.20493	1.62311	0	0.00472448	0	0	0.703887		0.115996	-67.8899	-50.4789	5.73477	0	-0.248249	0	0	-23.1103		0.212748	-7014.21	-8272.19	4041.46	-128.94	-550.82	-26.312	-6.93156	-1403.39		-667.091	-67.8899	-50.4789	5.73477	0	-0.248249	0	0	-23.1103
461	Complex_1	-27.0635	-0.903835	1.85684	-4.12435	-3.7447	-1.15749	0	5.75257		-24.7425	1.87203	-1.6066	1.85684	0	-0.00240049	0	0	1.11229		0.511898	-67.9857	-50.4802	5.73325	0	-0.248239	0	0	-23.2042		0.213712	-6939.44	-8364.78	4058.14	-133.653	-543.624	-24.5814	-9.75675	-1373.59		-547.593	-67.9857	-50.4802	5.73325	0	-0.248239	0	0	-23.2042
462	Complex_1	-25.9019	2.8366	2.15701	-3.01756	-4.40724	-0.773405	0	4.58331		-27.2806	2.22285	-0.708698	2.15701	0	0.00393586	0	0	0.187819		0.582777	-67.8742	-49.7777	5.74076	0	-0.248333	0	0	-23.7724		0.183493	-7070.14	-8324.41	4039.63	-128.653	-553.164	-20.7121	-11.9705	-1394.32		-676.546	-67.8742	-49.7777	5.74076	0	-0.248333	0	0	-23.7724
463	Complex_1	-21.7555	3.9959	2.12232	-3.79848	-3.96195	-0.234129	0	4.75515		-24.6343	2.36736	0.408196	2.12232	0	-0.00446583	0	0	-0.294013		0.135326	-67.9891	-49.7748	5.7417	0	-0.248336	0	0	-23.8896		0.181896	-6991.43	-8325.37	4031.96	-133.158	-556.944	-23.2871	-14.3278	-1382.6		-587.699	-67.9891	-49.7748	5.7417	0	-0.248336	0	0	-23.8896
464	Complex_1	-23.9465	2.15957	1.94351	-3.94071	-4.13148	-0.363847	0	4.64681		-24.2604	2.71826	-0.622626	1.94351	0	-0.000803188	0	0	0.765409		0.63277	-68.0282	-49.7713	5.74316	0	-0.248299	0	0	-23.931		0.179254	-7047.29	-8285.17	3964.25	-126.918	-549.618	-23.3929	-12.8047	-1407.28		-606.363	-68.0282	-49.7713	5.74316	0	-0.248299	0	0	-23.931
465	Complex_1	-26.4301	-1.41638	1.63117	-3.59237	-4.0299	-0.631378	0	7.203		-25.5942	2.27113	-0.429903	1.63117	0	-0.00368201	0	0	0.333811		0.739733	-67.9728	-49.7753	5.73967	0	-0.248347	0	0	-23.8705		0.181607	-7030.98	-8320.25	3996.66	-127.444	-546.135	-25.2988	-13.3433	-1370.77		-624.4	-67.9728	-49.7753	5.73967	0	-0.248347	0	0	-23.8705
466	Complex_1	-24.352	-0.00417748	2.80337	-3.7005	-4.52352	-0.0940491	0	5.49787		-24.3309	3.14018	-1.45223	2.80337	0	0.0125583	0	0	1.09564		0.680846	-67.9238	-49.7769	5.74205	0	-0.248313	0	0	-23.8228		0.182187	-6928.76	-8315.25	4129.51	-129.425	-553.764	-25.5961	-18.8326	-1388.53		-626.874	-67.9238	-49.7769	5.74205	0	-0.248313	0	0	-23.8228
467	Complex_1	-23.8673	3.82561	2.2402	-3.3883	-4.46498	-0.632577	0	4.00967		-25.4569	2.46257	0.160134	2.2402	0	0.00358964	0	0	-0.573078		0.631723	-67.9275	-49.7918	5.73907	0	-0.248391	0	0	-23.8162		0.189768	-6954.44	-8288.2	4045.41	-127.391	-543.825	-23.9554	-12.796	-1380.02		-623.67	-67.9275	-49.7918	5.73907	0	-0.248391	0	0	-23.8162
468	Complex_1	-25.3112	-2.17158	2.07346	-3.93744	-4.16236	-0.00596225	0	5.29363		-22.4009	2.83688	-0.571788	2.07346	0	0.00512456	0	0	0.46615		0.863933	-68.0177	-49.7749	5.73955	0	-0.248334	0	0	-23.9177		0.18362	-7111.22	-8292.11	3963.8	-126.383	-558.742	-26.8693	-12.2527	-1420.72		-637.944	-68.0177	-49.7749	5.73955	0	-0.248334	0	0	-23.9177
469	Complex_1	-27.7303	0.612271	0.994559	-3.82705	-3.80313	-0.0328107	0	1.78989		-23.4641	1.09237	-0.868773	0.994559	0	-0.00573653	0	0	0.403646		0.568672	-67.9885	-49.769	5.74604	0	-0.248272	0	0	-23.8927		0.175375	-7009.41	-8273.49	4047.42	-124.766	-555.53	-25.3463	-15.6168	-1423.95		-638.128	-67.9885	-49.769	5.74604	0	-0.248272	0	0	-23.8927
470	Complex_1	-27.9087	-2.17499	2.09563	-3.35656	-4.19699	-0.144357	0	4.40152		-24.533	2.14031	-2.12639	2.09563	0	0.00300759	0	0	1.92738		0.240682	-67.9979	-49.752	5.74514	0	-0.248166	0	0	-23.9134		0.170596	-7123.97	-8275.99	3964.4	-125.878	-560.537	-26.626	-11.5017	-1434.21		-653.637	-67.9979	-49.752	5.74514	0	-0.248166	0	0	-23.9134
471	Complex_1	-28.236	-1.71887	1.37437	-3.3487	-4.57111	-0.438046	0	6.09282		-25.6265	1.15215	-0.410131	1.37437	0	0.00763222	0	0	-0.0747779		0.255057	-67.8945	-49.7773	5.74063	0	-0.24835	0	0	-23.7932		0.183702	-7085.21	-8344.67	3969.16	-128.856	-555.464	-25.7004	-12.0597	-1385.93		-601.7	-67.8945	-49.7773	5.74063	0	-0.24835	0	0	-23.7932
472	Complex_1	-29.4662	-6.14414	1.39492	-3.83089	-4.07663	-0.146772	0	6.25331		-22.916	1.46766	-0.515183	1.39492	0	0.0062042	0	0	0.285181		0.29654	-68.0442	-49.7778	5.74142	0	-0.248339	0	0	-23.9425		0.183032	-7062.87	-8267.85	4001.1	-127.853	-556.014	-27.0301	-15.6207	-1433.79		-635.806	-68.0442	-49.7778	5.74142	0	-0.248339	0	0	-23.9425
473	Complex_1	-25.2765	-0.8855	2.25526	-3.7001	-4.53135	-0.0707807	0	4.40963		-22.7536	2.67678	-0.425911	2.25526	0	0.00599768	0	0	0.239278		0.602154	-67.8806	-49.7754	5.74181	0	-0.248312	0	0	-23.7805		0.181828	-7051.36	-8311.52	4016.63	-128.313	-554.076	-28.245	-14.4444	-1401.62		-629.772	-67.8806	-49.7754	5.74181	0	-0.248312	0	0	-23.7805
474	Complex_1	-27.8913	-1.60953	1.75707	-3.93414	-4.21485	-1.14854	0	5.09479		-23.8361	2.25216	-2.47669	1.75707	0	-0.00292693	0	0	1.90806		1.06664	-68.0364	-49.7752	5.74083	0	-0.248367	0	0	-23.9369		0.183201	-7064.83	-8307.63	3994.62	-129.928	-549.047	-25.9541	-12.0638	-1421.1		-613.722	-68.0364	-49.7752	5.74083	0	-0.248367	0	0	-23.9369
475	Complex_1	-19.0525	1.78007	3.87812	-3.16723	-4.73803	-1.03708	0	4.24363		-20.012	5.98263	-0.793147	3.87812	0	0.00058601	0	0	0.570184		2.32689	-68.1739	-50.4942	5.73688	0	-0.24834	0	0	-23.3852		0.216982	-7005.26	-8313.89	4057.45	-128.548	-554.908	-25.5055	-12.8263	-1378.62		-648.413	-68.1739	-50.4942	5.73688	0	-0.24834	0	0	-23.3852
476	Complex_1	-22.3185	1.59758	2.91139	-4.13677	-3.59331	-0.0698621	0	6.12428		-25.1518	3.40682	-1.61538	2.91139	0	-0.00240735	0	0	1.27623		0.837004	-68.049	-50.4952	5.73292	0	-0.248375	0	0	-23.2591		0.220733	-7001.91	-8305.9	4057.9	-125.58	-557.992	-28.0669	-9.63698	-1389.86		-642.773	-68.049	-50.4952	5.73292	0	-0.248375	0	0	-23.2591
477	Complex_1	-27.6073	3.97383	1.0538	-3.82871	-4.15823	-0.0207966	0	4.32102		-28.9482	0.899218	-0.401637	1.0538	0	-0.00579213	0	0	0.320132		-0.0672866	-68.1524	-50.48	5.73652	0	-0.248223	0	0	-23.3727		0.212033	-7001.44	-8319.44	4039.3	-126.576	-556.735	-27.3275	-9.23686	-1393.83		-607.603	-68.1524	-50.48	5.73652	0	-0.248223	0	0	-23.3727
478	Complex_1	-25.6804	2.43875	2.03916	-3.64743	-4.54309	-0.224395	0	2.7917		-24.5351	2.43544	-2.0843	2.03916	0	-0.00224745	0	0	1.65251		0.830322	-68.1768	-50.495	5.73274	0	-0.248361	0	0	-23.3877		0.221481	-7048.68	-8333.16	4026.44	-132.544	-559.01	-24.9908	-10.0814	-1390.39		-624.939	-68.1768	-50.495	5.73274	0	-0.248361	0	0	-23.3877
479	Complex_1	-25.7994	-0.571465	1.60682	-3.93433	-4.56569	-0.397053	0	7.48686		-25.4245	2.09594	-2.25771	1.60682	0	-0.00438121	0	0	1.67365		1.07756	-67.9154	-49.7748	5.74234	0	-0.248334	0	0	-23.8164		0.181897	-6988.74	-8386.05	4017.82	-129.736	-549.842	-26.589	-10.9037	-1363.27		-540.184	-67.9154	-49.7748	5.74234	0	-0.248334	0	0	-23.8164
480	Complex_1	-32.9844	-0.887827	1.19655	-3.38293	-4.94229	-0.529869	0	3.60964		-28.0477	1.07274	-1.95888	1.19655	0	-0.00133209	0	0	1.48114		0.355252	-67.9259	-49.7862	5.74089	0	-0.248366	0	0	-23.8186		0.1864	-6913.11	-8328.99	4139.75	-128.594	-553.468	-25.396	-8.35075	-1388.27		-619.794	-67.9259	-49.7862	5.74089	0	-0.248366	0	0	-23.8186
481	Complex_1	-25.2313	4.99442	1.04617	-3.24562	-3.97908	-0.703206	0	-0.128096		-23.2159	2.07083	-0.513609	1.04617	0	-0.00994055	0	0	0.458701		1.0895	-68.1156	-50.4729	5.73482	0	-0.248239	0	0	-23.3409		0.211621	-7005.31	-8256.69	3996.66	-127.979	-545.803	-24.1195	-15.0819	-1428.32		-603.975	-68.1156	-50.4729	5.73482	0	-0.248239	0	0	-23.3409
482	Complex_1	-29.1823	-4.85097	1.94222	-4.26886	-4.0513	-0.740231	0	8.50611		-25.7193	2.00579	-1.82704	1.94222	0	0.00240768	0	0	1.36611		0.52209	-68.0753	-50.4713	5.73512	0	-0.248236	0	0	-23.3006		0.209852	-6919.77	-8343.73	4113.08	-130.623	-556.372	-25.2677	-9.82111	-1397.55		-569.486	-68.0753	-50.4713	5.73512	0	-0.248236	0	0	-23.3006
483	Complex_1	-29.4695	2.98723	2.43938	-3.69474	-3.98589	-1.42766	0	2.59601		-28.3838	2.49822	-1.52645	2.43938	0	0.0006813	0	0	1.29432		0.290284	-68.243	-50.4702	5.73568	0	-0.248216	0	0	-23.4694		0.209173	-7012.55	-8368.74	4164.87	-130.99	-556.588	-27.8525	-12.0528	-1388.41		-692.792	-68.243	-50.4702	5.73568	0	-0.248216	0	0	-23.4694
484	Complex_1	-29.5746	-1.37398	2.04684	-3.85793	-4.11805	-0.902041	0	8.08943		-29.4589	1.99621	-1.58419	2.04684	0	0.00854871	0	0	1.2283		0.296715	-68.1099	-50.4945	5.73458	0	-0.248327	0	0	-23.3196		0.217887	-6989.52	-8306.45	4103.26	-127.147	-555.767	-24.9797	-11.5609	-1410.89		-655.996	-68.1099	-50.4945	5.73458	0	-0.248327	0	0	-23.3196
485	Complex_1	-28.4866	0.888824	1.80856	-3.94202	-4.06235	-1.46076	0	6.3162		-28.035	1.3633	-1.21426	1.80856	0	0.00509367	0	0	0.828998		-0.0650922	-67.9698	-50.4783	5.73443	0	-0.248224	0	0	-23.1905		0.212799	-6931.66	-8309.43	4103.73	-131.286	-554.947	-25.7216	-14.3155	-1416.02		-583.666	-67.9698	-50.4783	5.73443	0	-0.248224	0	0	-23.1905
486	Complex_1	-28.759	-2.72247	1.9985	-3.73812	-4.32978	-1.04871	0	3.53261		-22.451	2.52272	-1.97764	1.9985	0	-0.00225437	0	0	1.59486		0.909251	-68.2122	-50.4703	5.73284	0	-0.248254	0	0	-23.4388		0.212341	-7051.75	-8360.8	4015.94	-130.298	-552.097	-26.6374	-7.61389	-1396.68		-593.56	-68.2122	-50.4703	5.73284	0	-0.248254	0	0	-23.4388
487	Complex_1	-28.7447	-1.08352	2.17646	-3.74805	-4.60836	-1.13254	0	8.52705		-28.8758	1.99852	-1.54266	2.17646	0	0.00453679	0	0	1.14611		0.214069	-68.0218	-50.4781	5.73443	0	-0.248268	0	0	-23.2427		0.212916	-7044.42	-8370.13	4037.71	-126.277	-560.581	-25.0591	-7.31116	-1354.35		-638.417	-68.0218	-50.4781	5.73443	0	-0.248268	0	0	-23.2427
488	Complex_1	-0.0855093	2.30131	-0.000861656	0	1.00387e-05	0	0	-2.38799		0.00202225	-0.075535	-0.00758601	-0.000861656	0	1.00387e-05	0	0	-0.0699441		0.00284672	-68.0919	-50.4744	5.73405	0	-0.248249	0	0	-23.3161		0.212839	-7008.36	-8284.38	4040.74	-125.057	-552.802	-24.8837	-12.511	-1431.14		-618.325	-68.0919	-50.4744	5.73405	0	-0.248249	0	0	-23.3161
489	Complex_1	0.0419168	1.75266	-0.000319718	0	9.07868e-06	0	0	-1.70847		-0.00195544	0.0530727	0.00812475	-0.000319718	0	9.07868e-06	0	0	0.0465612		-0.00130262	-68.1113	-50.4997	5.73791	0	-0.248274	0	0	-23.3189		0.217668	-6938.29	-8322.87	4047.75	-121.483	-555.206	-30.8519	-13.9196	-1392.36		-549.359	-68.1113	-50.4997	5.73791	0	-0.248274	0	0	-23.3189
490	Complex_1	-0.010069	1.77264	6.98446e-05	0	-1.10002e-06	0	0	-1.78198		-0.000802209	-0.00612004	0.000760488	6.98446e-05	0	-1.10002e-06	0	0	-0.00672915		-0.000220121	-68.002	-50.4749	5.73416	0	-0.248236	0	0	-23.2249		0.211955	-6953.33	-8331.01	4041.09	-125.482	-548.91	-26.6881	-6.15412	-1386.61		-569.559	-68.002	-50.4749	5.73416	0	-0.248236	0	0	-23.2249
491	Complex_1	0.0158456	2.37054	0.000466833	0	5.84705e-06	0	0	-2.35306		-0.00210819	0.0251096	0.00387397	0.000466833	0	5.84705e-06	0	0	0.0221431		-0.0013802	-68.1419	-50.476	5.73415	0	-0.248232	0	0	-23.3645		0.212702	-6997.58	-8293.71	4038.63	-118.675	-556.285	-27.8844	-12.8123	-1386.87		-639.971	-68.1419	-50.476	5.73415	0	-0.248232	0	0	-23.3645
492	Complex_1	-0.0146619	1.49806	-6.44685e-05	-1.42109e-14	-5.39585e-06	0	0	-1.5118		-0.000859227	-0.0075346	0.000805285	-6.44685e-05	0	-5.39585e-06	0	0	-0.00811984		-0.00015018	-68.0979	-50.4822	5.73516	0	-0.248253	0	0	-23.3164		0.213767	-6983.31	-8289	4079.24	-121.124	-543.099	-28.3435	-12.5666	-1442.11		-626.304	-68.0979	-50.4822	5.73516	0	-0.248253	0	0	-23.3164
493	Complex_1	-0.00238845	0.720676	0.000452408	0	-1.53131e-05	0	0	-0.721592		-0.00190913	-0.000639645	0.00214157	0.000452408	0	-1.53131e-05	0	0	-0.00178478		-0.00143353	-68.0122	-50.4772	5.73275	0	-0.248215	0	0	-23.2328		0.21329	-7026.66	-8266.19	4018.35	-119.628	-541.412	-24.6745	-8.86003	-1433.5		-650.744	-68.0122	-50.4772	5.73275	0	-0.248215	0	0	-23.2328
494	Complex_1	-0.0162977	0.732066	0.00152255	0	6.84127e-05	0	0	-0.742486		-0.00746837	-0.0106077	0.0140923	0.00152255	0	6.84127e-05	0	0	-0.0191978		-0.00709322	-68.0009	-49.793	5.74067	0	-0.248361	0	0	-23.889		0.188743	-6897.78	-8301.25	4077.43	-123.064	-551.093	-23.0586	-4.23715	-1431.15		-541.356	-68.0009	-49.793	5.74067	0	-0.248361	0	0	-23.889
495	Complex_1	-26.2413	4.44346	1.06784	-3.68636	-4.1034	-0.0453987	0	-0.462647		-23.4548	1.09949	-0.783401	1.06784	0	0.000455784	0	0	0.384193		0.430405	-67.932	-49.7727	5.74037	0	-0.248348	0	0	-23.8337		0.182458	-7020.26	-8311.59	4042.12	-131.535	-556.255	-26.0774	-11.7919	-1426.34		-598.788	-67.932	-49.7727	5.74037	0	-0.248348	0	0	-23.8337
496	Complex_1	-25.9422	-1.76512	0.918708	-3.33446	-4.89095	-0.320966	0	5.71232		-22.2617	2.10603	-0.769156	0.918708	0	-0.00873801	0	0	0.249969		1.71525	-68.0177	-49.7751	5.74165	0	-0.248347	0	0	-23.9184		0.182471	-7027.3	-8304.58	4091.51	-125.064	-562.392	-26.1433	-10.6165	-1390.49		-699.529	-68.0177	-49.7751	5.74165	0	-0.248347	0	0	-23.9184
497	Complex_1	-25.2244	0.810644	1.70938	-3.86213	-4.11126	-0.121842	0	4.25672		-23.9059	2.48402	-1.08013	1.70938	0	-0.00157176	0	0	0.763544		1.09279	-67.9228	-49.7747	5.74109	0	-0.248319	0	0	-23.8227		0.181833	-6964.17	-8322.47	4089.47	-126.358	-548.723	-24.5212	-8.14544	-1383.93		-639.49	-67.9228	-49.7747	5.74109	0	-0.248319	0	0	-23.8227
498	Complex_1	0.00899463	0.823414	-0.000234038	0	1.90712e-05	0	0	-0.814198		-6.09419e-06	0.0081172	0.0013309	-0.000234038	0	1.90712e-05	0	0	0.00681037		0.000190887	-67.9586	-49.7817	5.7412	0	-0.248386	0	0	-23.8542		0.184518	-7011.19	-8308.21	4019.82	-118.805	-545.732	-25.1157	-7.00359	-1429.29		-596.857	-67.9586	-49.7817	5.7412	0	-0.248386	0	0	-23.8542
499	Complex_1	0.0850961	1.32175	0.00242302	0	0.000115201	0	0	-1.23007		-0.00912153	0.0932206	0.0115969	0.00242302	0	0.000115201	0	0	0.0878291		-0.0087436	-67.8847	-49.7913	5.74	0	-0.248439	0	0	-23.7759		0.190853	-7072.36	-8351.42	3986.88	-123.551	-547.01	-24.8354	-11.7155	-1395.76		-604.948	-67.8847	-49.7913	5.74	0	-0.248439	0	0	-23.7759
500	Complex_1	-25.6772	-3.23833	2.16172	-4.08322	-3.86305	-0.550275	0	5.69718		-21.8012	2.45066	-2.2732	2.16172	0	-0.00507505	0	0	1.52616		1.04105	-68.0915	-50.4729	5.73416	0	-0.248244	0	0	-23.3165		0.211952	-6965.39	-8340.17	4094.76	-129.521	-547.824	-24.3072	-13.2239	-1373.79		-631.315	-68.0915	-50.4729	5.73416	0	-0.248244	0	0	-23.3165
501	Complex_1	-20.5603	-3.83659	2.22297	-3.95152	-3.9982	-0.211709	0	6.41033		-17.1956	3.78368	-1.13187	2.22297	0	0.00498134	0	0	1.09269		1.59491	-68.0944	-49.7718	5.74215	0	-0.248338	0	0	-23.997		0.180632	-6980.96	-8296.04	4021.62	-125.221	-553	-26.21	-9.39075	-1426.16		-566.548	-68.0944	-49.7718	5.74215	0	-0.248338	0	0	-23.997
502	Complex_1	-29.0334	3.22177	2.16519	-3.82625	-4.35621	-0.603973	0	1.64883		-27.2828	2.37098	0.0572856	2.16519	0	-0.00340678	0	0	-0.595802		0.747714	-67.8563	-49.7772	5.74308	0	-0.248378	0	0	-23.7573		0.183563	-6916.36	-8256.57	4072.14	-122.607	-544.215	-27.3813	-8.78509	-1428.16		-600.773	-67.8563	-49.7772	5.74308	0	-0.248378	0	0	-23.7573
503	Complex_1	-26.4608	1.27488	1.85988	-3.34432	-4.63018	-0.0641575	0	6.22964		-27.7865	2.21397	0.248282	1.85988	0	-0.0069094	0	0	-0.506011		0.618722	-68.0949	-49.773	5.74161	0	-0.248329	0	0	-23.9964		0.181251	-7027.38	-8324.55	4045.61	-125.194	-552.713	-26.0436	-9.8633	-1397.91		-636.709	-68.0949	-49.773	5.74161	0	-0.248329	0	0	-23.9964
504	Complex_1	0.00372401	1.36012	0.000919447	0	9.97452e-07	0	0	-1.35632		-0.000993855	0.00965388	-0.00115656	0.000919447	0	9.97452e-07	0	0	0.0105194		-0.000629405	-67.9878	-49.7748	5.74258	0	-0.248317	0	0	-23.8888		0.181483	-6975.44	-8270.97	4039.44	-123.526	-544.607	-28.0325	-16.5449	-1418.17		-613.035	-67.9878	-49.7748	5.74258	0	-0.248317	0	0	-23.8888
505	Complex_1	-0.00552632	0.795874	-0.0011715	0	4.01432e-05	0	0	-0.799858		-0.000410822	-0.00537271	0.00116232	-0.0011715	0	4.01432e-05	0	0	-0.00532441		-7.92649e-05	-68.1517	-50.4733	5.7349	0	-0.248265	0	0	-23.3759		0.210953	-6903.02	-8249.88	4084.29	-123.634	-536.362	-26.5423	-9.34075	-1415.92		-625.631	-68.1517	-50.4733	5.7349	0	-0.248265	0	0	-23.3759
506	Complex_1	0.11022	1.14841	0.00202717	-1.42109e-14	5.64702e-05	0	0	-1.03371		-0.00656786	0.11677	0.0118295	0.00202717	0	5.64702e-05	0	0	0.108872		-0.00601521	-68.0716	-49.7781	5.73954	0	-0.248394	0	0	-23.9697		0.185063	-6968.06	-8276.59	4078.78	-122.117	-551.572	-27.2401	-9.72993	-1411.84		-647.743	-68.0716	-49.7781	5.73954	0	-0.248394	0	0	-23.9697
507	Complex_1	6.36646e-12	3.63798e-12	4.54747e-13	0	0	0	0	4.77485e-12		-4.54747e-13	0	0	0	0	0	0	0	0		0	-67.9595	-49.7924	5.74336	0	-0.248334	0	0	-23.848		0.185918	-7042.72	-8302.86	4003.97	-123.121	-553.473	-25.0145	-15.6556	-1402.03		-624.541	-67.9595	-49.7924	5.74336	0	-0.248334	0	0	-23.848
508	Complex_1	-1.00044e-11	-3.63798e-12	-4.54747e-13	0	0	0	0	-7.04858e-12		-4.54747e-13	0	0	0	0	0	0	0	0		0	-68.1551	-50.4879	5.73396	0	-0.248308	0	0	-23.372		0.219111	-6967.32	-8317.38	4067.36	-125.756	-544.908	-27.2684	-15.6784	-1377.62		-626.066	-68.1551	-50.4879	5.73396	0	-0.248308	0	0	-23.372
509	Complex_1	-2.72848e-12	7.27596e-12	-4.54747e-13	0	0	0	0	-1.25056e-11		0	0	0	0	0	0	0	0	0		0	-68.1989	-50.4709	5.73555	0	-0.248218	0	0	-23.4249		0.209609	-6963.77	-8342.23	4038.12	-125.637	-543.798	-21.3273	-15.0774	-1383.18		-570.638	-68.1989	-50.4709	5.73555	0	-0.248218	0	0	-23.4249
510	Complex_1	1.36424e-11	3.63798e-12	-1.81899e-12	0	1.13687e-13	0	0	8.18545e-12		-1.13687e-13	0	0	0	0	0	0	0	0		0	-65.8848	-53.6161	8.23783	0	-0.247031	0	0	-21.4427		1.18313	-7032.64	-8318.13	4069.63	-126.986	-558.644	-25.938	-11.0201	-1410.46		-651.085	-65.8848	-53.6161	8.23783	0	-0.247031	0	0	-21.4427
511	Complex_1	1.36424e-11	4.54747e-12	9.09495e-13	0	1.13687e-13	0	0	1.09139e-11		1.13687e-13	0	0	0	0	0	0	0	0		0	-67.9485	-50.4821	5.73484	0	-0.248269	0	0	-23.1676		0.214582	-6930.39	-8238.55	4043.31	-120.345	-543.797	-24.036	-11.1902	-1427.87		-607.91	-67.9485	-50.4821	5.73484	0	-0.248269	0	0	-23.1676
512	Complex_1	1.00044e-11	1.09139e-11	9.09495e-13	0	0	0	0	-2.04636e-12		-1.13687e-13	0	0	0	0	0	0	0	0		0	-67.9022	-49.7755	5.73927	0	-0.248335	0	0	-23.801		0.183414	-7039.83	-8229.68	3953.34	-122.985	-537.924	-24.1887	-14.6436	-1462.85		-600.888	-67.9022	-49.7755	5.73927	0	-0.248335	0	0	-23.801
513	Complex_1	1.81899e-12	1.81899e-12	-9.09495e-13	0	0	0	0	-3.63798e-12		-4.54747e-13	0	0	0	0	0	0	0	0		0	-67.9628	-50.4804	5.73156	0	-0.248263	0	0	-23.1819		0.2162	-6982.36	-8246.26	4041.67	-120.197	-551.077	-24.7892	-13.0574	-1447.51		-621.14	-67.9628	-50.4804	5.73156	0	-0.248263	0	0	-23.1819
514	Complex_1	-4.54747e-12	-5.45697e-12	2.72848e-12	0	0	0	0	-2.72848e-12		2.27374e-13	0	0	0	0	0	0	0	0		0	-68.0793	-50.4923	5.73496	0	-0.248256	0	0	-23.2899		0.216226	-6950.59	-8325.91	4110.02	-122.509	-545.476	-24.6333	-12.2784	-1411.49		-618.311	-68.0793	-50.4923	5.73496	0	-0.248256	0	0	-23.2899
515	Complex_1	-8.18545e-12	-1.09139e-11	1.81899e-12	0	0	0	0	-4.54747e-13		-2.27374e-13	0	0	0	0	0	0	0	0		0	-68.0047	-50.4764	5.73293	0	-0.248297	0	0	-23.2271		0.214092	-6931.59	-8340.01	4074.89	-127.356	-546.268	-26.6222	-14.4417	-1406.78		-545.007	-68.0047	-50.4764	5.73293	0	-0.248297	0	0	-23.2271
516	Complex_1	-2.27374e-11	-9.09495e-12	4.54747e-13	0	-1.13687e-13	0	0	-1.31877e-11		-3.41061e-13	0	0	0	0	0	0	0	0		0	-68.0742	-50.4786	5.73823	0	-0.248208	0	0	-23.2971		0.211462	-6908.32	-8332.33	4051.07	-123.139	-541.874	-28.1153	-15.1461	-1376.24		-542.55	-68.0742	-50.4786	5.73823	0	-0.248208	0	0	-23.2971
517	Complex_1	1.09139e-11	0	4.54747e-13	0	-1.13687e-13	0	0	1.65983e-11		3.41061e-13	0	0	0	0	0	0	0	0		0	-68.0498	-49.7824	5.74213	0	-0.248364	0	0	-23.9465		0.185235	-6965.73	-8290.84	4033.33	-125.03	-552.129	-26.0975	-11.145	-1420.02		-573.804	-68.0498	-49.7824	5.74213	0	-0.248364	0	0	-23.9465
518	Complex_1	-26.1079	-5.79282	1.32699	-3.86863	-4.38279	-0.135091	0	9.25051		-22.506	1.12758	-0.362226	1.32699	0	0.00718826	0	0	-0.065106		0.220733	-68.0533	-50.4741	5.73638	0	-0.248184	0	0	-23.277		0.209648	-6974.7	-8288.52	4089.96	-125.418	-555.194	-30.071	-13.9157	-1416.06		-635.482	-68.0533	-50.4741	5.73638	0	-0.248184	0	0	-23.277
519	Complex_1	-27.8193	-3.43849	2.15964	-4.03929	-4.53533	-0.4343	0	6.38959		-23.9211	2.68246	-1.19116	2.15964	0	-0.00369913	0	0	0.871901		0.845771	-68.063	-49.7782	5.74132	0	-0.248379	0	0	-23.961		0.183311	-6937.17	-8387.2	4045.95	-128.513	-547.109	-28.6236	-12.3615	-1373.64		-505.681	-68.063	-49.7782	5.74132	0	-0.248379	0	0	-23.961
520	Complex_1	-26.076	3.5356	0.880457	-3.38939	-4.16146	-0.0512314	0	2.57773		-25.4677	0.785568	-0.337545	0.880457	0	-0.00250288	0	0	0.0617049		0.183454	-67.968	-49.773	5.74001	0	-0.248331	0	0	-23.8692		0.182559	-7036.24	-8252.55	4021.78	-122.971	-542.569	-23.7786	-17.1062	-1408.23		-690.817	-67.968	-49.773	5.74001	0	-0.248331	0	0	-23.8692
521	Complex_1	-22.6655	3.24403	1.42589	-3.05939	-4.0299	-0.773298	0	4.46598		-23.9388	1.58854	-0.916914	1.42589	0	0.00699997	0	0	0.590771		0.481798	-68.0329	-49.7802	5.73819	0	-0.248355	0	0	-23.9274		0.184832	-6929.32	-8313.55	4183.87	-126.88	-556.367	-25.7334	-13.722	-1390.68		-686.258	-68.0329	-49.7802	5.73819	0	-0.248355	0	0	-23.9274
522	Complex_1	-24.8007	-2.05589	2.03743	-3.57926	-4.24792	-0.541212	0	6.50052		-22.9144	2.04641	-1.12493	2.03743	0	0.0086698	0	0	0.757452		0.36778	-68.146	-50.4695	5.73407	0	-0.24825	0	0	-23.3728		0.210461	-7103.98	-8266.8	3971.09	-124.045	-556.754	-26.3907	-14.4272	-1427.85		-658.807	-68.146	-50.4695	5.73407	0	-0.24825	0	0	-23.3728
523	Complex_1	-28.5916	0.467931	-0.859058	-2.9042	-3.55683	-0.0301788	0	4.3112		-26.0205	-0.939882	2.08667	-0.859058	0	-0.00340684	0	0	-1.20102		-0.963065	-65.8908	-53.6099	8.23784	0	-0.247029	0	0	-21.4522		1.18055	-6978.35	-8282.36	4048.66	-120.29	-557.871	-29.4982	-16.0045	-1416.61		-604.377	-65.8908	-53.6099	8.23784	0	-0.247029	0	0	-21.4522
524	Complex_1	-0.0475779	1.00309	0.00204169	2.84217e-14	3.77059e-05	0	0	-1.04807		-0.00467779	-0.0360951	0.00535545	0.00204169	0	3.77059e-05	0	0	-0.0392175		-0.00431249	-67.0509	-50.7162	6.94816	0	-0.247758	0	0	-23.6255		0.5904	-6892.06	-8247.96	4138.3	-116.674	-540.907	-25.2591	-15.191	-1435.74		-648.631	-67.0509	-50.7162	6.94816	0	-0.247758	0	0	-23.6255
525	Complex_1	-0.0279868	0.693547	0.00129618	0	6.55387e-05	0	0	-0.721163		-0.00173286	-0.0228522	-0.00236464	0.00129618	0	6.55387e-05	0	0	-0.0203841		-0.00146512	-68.0856	-50.4735	5.73457	0	-0.248266	0	0	-23.3105		0.211998	-7006.4	-8295.21	4064.56	-118.819	-554.232	-22.3335	-16.6484	-1435.29		-628.433	-68.0856	-50.4735	5.73457	0	-0.248266	0	0	-23.3105
526	Complex_1	-0.139829	0.623809	-0.000478201	0	-9.21151e-06	0	0	-0.762666		-0.000483661	-0.132395	0.00135358	-0.000478201	0	-9.21151e-06	0	0	-0.133214		-4.75489e-05	-68.005	-50.4768	5.73521	0	-0.248247	0	0	-23.2269		0.211766	-6889.48	-8266.42	4090.66	-118.234	-541.538	-25.4025	-7.1078	-1430.29		-591.157	-68.005	-50.4768	5.73521	0	-0.248247	0	0	-23.2269
527	Complex_1	1.90994e-11	-1.81899e-12	4.54747e-13	0	0	0	0	2.18279e-11		-1.13687e-13	0	0	0	0	0	0	0	0		0	-68.1012	-50.4773	5.73539	0	-0.248272	0	0	-23.3237		0.212613	-7036.75	-8294.75	4021.18	-118.396	-548.078	-22.8616	-11.3686	-1426.6		-635.869	-68.1012	-50.4773	5.73539	0	-0.248272	0	0	-23.3237
528	Complex_1	1.00044e-11	1.09139e-11	-9.09495e-13	0	0	0	0	3.63798e-12		-1.13687e-13	0	0	0	0	0	0	0	0		0	-68.0567	-50.4775	5.73392	0	-0.248269	0	0	-23.2781		0.213249	-6957.52	-8317.14	4108.95	-120.389	-555.69	-22.0647	-5.57082	-1417.1		-628.517	-68.0567	-50.4775	5.73392	0	-0.248269	0	0	-23.2781
529	Complex_1	-8.18545e-12	6.36646e-12	9.09495e-13	0	0	0	0	-1.06866e-11		-2.27374e-13	0	0	0	0	0	0	0	0		0	-68.0756	-50.4816	5.73486	0	-0.248252	0	0	-23.2934		0.212876	-7034.15	-8239.64	3976.47	-120.762	-554.117	-23.9849	-9.33757	-1456.1		-606.683	-68.0756	-50.4816	5.73486	0	-0.248252	0	0	-23.2934
530	Complex_1	1.09139e-11	-1.81899e-12	-1.36424e-12	0	0	0	0	1.79625e-11		-9.09495e-13	0	0	0	0	0	0	0	0		0	-68.0548	-50.4902	5.73263	0	-0.248266	0	0	-23.2667		0.217797	-7016.9	-8282.85	4004.42	-121.17	-555.319	-23.8218	-11.0652	-1443.7		-583.398	-68.0548	-50.4902	5.73263	0	-0.248266	0	0	-23.2667
531	Complex_1	-0.044345	0.54272	0.000525545	0	-6.84711e-06	0	0	-0.587625		4.1642e-05	-0.0341656	-0.00187063	0.000525545	0	-6.84711e-06	0	0	-0.03322		0.000406335	-67.9141	-50.4789	5.73315	0	-0.248257	0	0	-23.1343		0.214175	-7088.22	-8239.34	3927.55	-114.79	-547.56	-24.1801	-12.2715	-1445.61		-632.015	-67.9141	-50.4789	5.73315	0	-0.248257	0	0	-23.1343
532	Complex_1	-22.7537	9.52306	1.76119	-2.11593	-4.61252	-0.105508	0	-0.132806		-27.0712	1.68722	-0.483812	1.76119	0	0.00681839	0	0	0.624387		-0.221368	-68.1086	-50.4714	5.73431	0	-0.248245	0	0	-23.3341		0.210839	-6981.94	-8266.96	4080.27	-122.916	-560.577	-24.6133	-7.4486	-1428.5		-651.194	-68.1086	-50.4714	5.73431	0	-0.248245	0	0	-23.3341
533	Complex_1	-19.9426	2.93847	2.68845	-2.67287	-4.47569	-0.0246092	0	4.10018		-22.4965	2.9663	-1.89272	2.68845	0	-0.000230506	0	0	1.25344		0.917375	-68.1702	-50.4732	5.73412	0	-0.248263	0	0	-23.3949		0.211955	-7015.86	-8324.54	4082.73	-127.299	-554.644	-20.6414	-8.44394	-1413.75		-649.266	-68.1702	-50.4732	5.73412	0	-0.248263	0	0	-23.3949
534	Complex_1	-19.8996	6.11819	2.25532	-1.87405	-4.35249	-0.00154398	0	-0.505763		-21.5393	2.58903	-1.72188	2.25532	0	-0.00551679	0	0	1.28983		0.771276	-68.1258	-50.4755	5.73228	0	-0.248347	0	0	-23.3507		0.216437	-6967.01	-8309.72	4105.03	-123.665	-556.033	-17.5181	-7.45458	-1429.57		-628.083	-68.1258	-50.4755	5.73228	0	-0.248347	0	0	-23.3507
535	Complex_1	-19.1759	5.23647	2.52805	-2.96691	-4.81408	-1.48e-05	0	3.79975		-22.9591	2.97331	-0.424684	2.52805	0	-0.00246761	0	0	0.468819		0.403593	-67.9998	-50.5029	5.73789	0	-0.248358	0	0	-23.208		0.221642	-6858.9	-8313.79	4157.32	-125.152	-550.945	-21.7137	-11.9025	-1401.24		-591.476	-67.9998	-50.5029	5.73789	0	-0.248358	0	0	-23.208
536	Complex_1	-22.0485	6.80379	0.483871	-2.91031	-4.41059	-4.93373e-05	0	0.160042		-22.1752	0.345359	-0.0933928	0.483871	0	0.00815429	0	0	-0.0242039		-0.0290691	-68.0633	-50.4759	5.73427	0	-0.248237	0	0	-23.2858		0.212389	-7108.87	-8243.27	3949.05	-121.227	-547.481	-21.1648	-7.34476	-1445.65		-671.782	-68.0633	-50.4759	5.73427	0	-0.248237	0	0	-23.2858
537	Complex_1	-20.8651	7.28158	1.92148	-2.24577	-4.58694	-0.000264035	0	2.71459		-25.9498	2.67135	0.185505	1.92148	0	-0.00183853	0	0	0.0623327		0.503869	-68.0685	-50.4667	5.73026	0	-0.248389	0	0	-23.2994		0.21582	-6999.21	-8285.65	3980.55	-126.946	-550.38	-20.8917	-13.9282	-1422.22		-559.728	-68.0685	-50.4667	5.73026	0	-0.248389	0	0	-23.2994
538	Complex_1	0.0549528	0.324984	-0.00283706	0	-9.89286e-05	0	0	-0.270819		0.00372321	0.0728159	0.00281083	-0.00283706	0	-9.89286e-05	0	0	0.069182		0.00375912	-68.1022	-50.4719	5.73379	0	-0.248247	0	0	-23.3273		0.211384	-6919.96	-8252.62	4093.88	-119.76	-542.639	-23.8914	-15.494	-1424.07		-635.368	-68.1022	-50.4719	5.73379	0	-0.248247	0	0	-23.3273
539	Complex_1	-7.27596e-12	9.09495e-12	-1.81899e-12	0	1.13687e-13	0	0	-1.54614e-11		3.41061e-13	0	0	0	0	0	0	0	0		0	-68.101	-50.4769	5.73421	0	-0.248241	0	0	-23.3225		0.212385	-6921.9	-8306.86	4070.1	-117.389	-540.902	-24.8542	-7.23695	-1430.5		-564.261	-68.101	-50.4769	5.73421	0	-0.248241	0	0	-23.3225
540	Complex_1	-0.0167023	0.144089	-0.000106287	0	-1.47977e-06	0	0	-0.160344		-0.000339473	-0.00696218	0.00179391	-0.000106287	0	-1.47977e-06	0	0	-0.008329		-0.000319323	-68.0148	-50.4591	5.73027	0	-0.248243	0	0	-23.2461		0.208334	-7013.03	-8269.03	4039.3	-119.63	-548.235	-25.2436	-11.5723	-1452.73		-625.886	-68.0148	-50.4591	5.73027	0	-0.248243	0	0	-23.2461
541	Complex_1	-2.36469e-11	-3.63798e-12	-9.09495e-13	0	0	0	0	-1.38698e-11		-2.27374e-13	0	0	0	0	0	0	0	0		0	-67.9687	-50.5	5.7367	0	-0.248232	0	0	-23.1769		0.219793	-6984.24	-8248	4034.46	-118.039	-546.921	-21.0376	-12.7726	-1452.94		-618.989	-67.9687	-50.5	5.7367	0	-0.248232	0	0	-23.1769
542	Complex_1	0.0391072	0.183498	-0.00384886	0	1.79546e-05	0	0	-0.138615		-0.00194518	0.0478313	0.0131453	-0.00384886	0	1.79546e-05	0	0	0.0404418		-0.00192484	-68.0453	-49.783	5.74504	0	-0.248348	0	0	-23.9415		0.182584	-6941.24	-8251.42	4089.71	-117.205	-546.759	-20.7534	-11.3404	-1453.24		-630.231	-68.0453	-49.783	5.74504	0	-0.248348	0	0	-23.9415
543	Complex_1	-0.00103656	0.380813	0.000236411	0	-4.37e-06	0	0	-0.383119		0.00103776	0.0145334	-0.0031437	0.000236411	0	-4.37e-06	0	0	0.0163691		0.00107592	-68.0823	-50.4763	5.73526	0	-0.248247	0	0	-23.3044		0.211371	-6942.64	-8271.43	4076.46	-117.921	-546.513	-20.8298	-15.099	-1436.19		-611.12	-68.0823	-50.4763	5.73526	0	-0.248247	0	0	-23.3044
544	Complex_1	-0.0275194	0.223646	-0.00492391	0	5.37946e-06	0	0	-0.239927		-0.00631996	-0.0192235	0.0273153	-0.00492391	0	5.37946e-06	0	0	-0.0353328		-0.00628751	-67.9698	-49.8001	5.74677	0	-0.248341	0	0	-23.8559		0.187777	-6913.92	-8315.13	4150.42	-121.037	-548.871	-18.4099	-14.0398	-1416.54		-630.322	-67.9698	-49.8001	5.74677	0	-0.248341	0	0	-23.8559
545	Complex_1	-28.1198	-3.19771	0.752269	-4.06449	-4.49643	-0.473233	0	4.17238		-20.8126	1.33076	-0.146852	0.752269	0	-0.00347659	0	0	0.36872		0.360103	-67.9661	-49.7741	5.7383	0	-0.248361	0	0	-23.8656		0.183671	-7014.06	-8357.35	4053.52	-128.39	-554.722	-19.2063	-11.6418	-1378.56		-617.716	-67.9661	-49.7741	5.7383	0	-0.248361	0	0	-23.8656
546	Complex_1	-22.5643	2.67628	2.85422	-3.85629	-5.30541	-1.27221	0	3.28019		-20.9411	3.84021	-0.691946	2.85422	0	-0.00658996	0	0	0.374292		1.31023	-68.0964	-50.4754	5.73463	0	-0.248254	0	0	-23.3199		0.21242	-7016.01	-8289.8	4120.62	-120.908	-557.902	-25.4021	-11.3546	-1440.62		-690.652	-68.0964	-50.4754	5.73463	0	-0.248254	0	0	-23.3199
547	Complex_1	-21.013	-2.67127	2.07711	-4.088	-3.94684	-0.283084	0	3.17486		-15.2757	2.95925	-0.691134	2.07711	0	-0.00980724	0	0	0.224938		1.35815	-68.1047	-50.4636	5.73266	0	-0.248219	0	0	-23.3371		0.211436	-6884.66	-8298.15	4093	-124.781	-541.334	-25.5331	-19.1802	-1393.12		-575.555	-68.1047	-50.4636	5.73266	0	-0.248219	0	0	-23.3371
548	Complex_1	-23.79	7.33075	-0.936008	-3.36556	-4.56383	-0.000486388	0	1.17745		-23.4323	-0.135609	2.27634	-0.936008	0	-0.00430889	0	0	-0.968581		-0.50305	-65.891	-53.6103	8.23148	0	-0.247028	0	0	-21.4515		1.18639	-6935.31	-8238.88	4078.68	-123.016	-540.637	-24.633	-18.9918	-1455.45		-612.376	-65.891	-53.6103	8.23148	0	-0.247028	0	0	-21.4515
549	Complex_1	-22.211	4.3969	1.53657	-3.13522	-5.21599	-0.00321455	0	2.0944		-21.8845	2.42561	-1.38273	1.53657	0	-0.00550774	0	0	1.16762		1.10965	-68.1065	-50.4734	5.73409	0	-0.248254	0	0	-23.3315		0.212546	-6907.05	-8312.66	4083.53	-128.852	-542.529	-24.6923	-15.3048	-1423.55		-542.993	-68.1065	-50.4734	5.73409	0	-0.248254	0	0	-23.3315
550	Complex_1	-20.8606	4.86615	0.87574	-2.93581	-4.37634	-0.000205513	0	2.936		-22.2261	1.92314	0.456245	0.87574	0	0.000811137	0	0	0.395962		0.194387	-67.1118	-50.7327	6.96614	0	-0.247436	0	0	-23.6792		0.581384	-7006.1	-8227.86	4006.19	-121.339	-553.774	-25.1982	-14.5412	-1442.71		-626.865	-67.1118	-50.7327	6.96614	0	-0.247436	0	0	-23.6792
551	Complex_1	-18.7768	4.42101	3.76774	-3.74687	-4.51124	-1.34561e-05	0	6.81424		-25.5217	5.95137	3.3364	3.76774	0	0.00153823	0	0	-1.09898		-0.0553242	-68.0898	-49.7755	5.74107	0	-0.248337	0	0	-23.9901		0.183092	-6980.97	-8295.23	3996.28	-124.482	-545.64	-23.5293	-15.8981	-1440.82		-531.644	-68.0898	-49.7755	5.74107	0	-0.248337	0	0	-23.9901
552	Complex_1	-20.2912	6.66501	1.58293	-2.75077	-4.98471	-6.74309e-05	0	0.850562		-21.6541	2.87125	-0.802266	1.58293	0	-0.00746547	0	0	0.87865		1.2194	-66.9944	-50.7184	6.94786	0	-0.247748	0	0	-23.5674		0.591264	-6925.36	-8270.39	4081.38	-123.12	-554.467	-24.781	-23.5474	-1430.77		-579.67	-66.9944	-50.7184	6.94786	0	-0.247748	0	0	-23.5674
553	Complex_1	-22.8328	2.95049	0.317154	-2.90035	-4.34517	-1.24735e-05	0	4.50432		-23.3593	0.856525	0.600981	0.317154	0	0.00137127	0	0	-0.024217		-0.0387643	-67.9918	-49.7773	5.74146	0	-0.248352	0	0	-23.891		0.183403	-6908.22	-8345.92	4051.75	-129.649	-544.369	-24.8065	-17.1585	-1379.39		-518.678	-67.9918	-49.7773	5.74146	0	-0.248352	0	0	-23.891
554	Complex_1	-19.8417	6.19965	1.12036	-3.13624	-4.4122	-1.22939e-05	0	2.53448		-22.1477	2.06579	0.82821	1.12036	0	-0.000379949	0	0	-0.0446112		0.162207	-67.0042	-50.7153	6.94935	0	-0.247734	0	0	-23.5787		0.588219	-6969.13	-8303.08	4061.91	-123.038	-556.166	-22.4173	-23.5373	-1386.45		-616.343	-67.0042	-50.7153	6.94935	0	-0.247734	0	0	-23.5787
555	Complex_1	-21.5243	5.26025	2.64589	-3.13565	-5.2776	-0.00137705	0	3.21589		-24.2317	3.22997	-1.00039	2.64589	0	-0.00101578	0	0	0.898495		0.686993	-68.0734	-49.7737	5.74015	0	-0.248345	0	0	-23.9747		0.183196	-7026.06	-8261.34	3988.93	-131.712	-546.875	-24.8206	-27.7236	-1416.37		-606.152	-68.0734	-49.7737	5.74015	0	-0.248345	0	0	-23.9747
556	Complex_1	-16.4372	7.31867	4.14412	-3.37078	-4.65512	-5.08276e-05	0	2.50077		-22.3748	4.93106	-0.706345	4.14412	0	-0.00307299	0	0	0.723047		0.773316	-68.0294	-49.774	5.74005	0	-0.248333	0	0	-23.9296		0.182476	-6942.81	-8239.75	4060.16	-131.944	-552.129	-24.0708	-12.0952	-1444.18		-598.806	-68.0294	-49.774	5.74005	0	-0.248333	0	0	-23.9296
557	Complex_1	-22.9455	3.31912	2.26749	-3.20845	-5.13411	-0.00137809	0	4.44978		-24.6379	2.7885	-0.941306	2.26749	0	0.00161893	0	0	0.930129		0.53057	-68.1068	-49.7738	5.74097	0	-0.248337	0	0	-24.0075		0.181888	-6974.23	-8265.86	4022.08	-130.079	-545.906	-19.0936	-18.3773	-1437.79		-579.206	-68.1068	-49.7738	5.74097	0	-0.248337	0	0	-24.0075
558	Complex_1	-21.4787	5.89893	2.94895	-3.3598	-5.07018	-0.011995	0	3.80383		-25.6884	3.32402	-0.400368	2.94895	0	0.0125596	0	0	0.581448		0.181433	-68.0565	-49.7784	5.74004	0	-0.248359	0	0	-23.9545		0.184766	-7014.01	-8293.99	4000.12	-127.004	-548.94	-22.2521	-15.9849	-1433.62		-572.336	-68.0565	-49.7784	5.74004	0	-0.248359	0	0	-23.9545
559	Complex_1	-21.3015	5.64615	-0.609062	-2.94844	-4.87159	-0.00172546	0	3.27346		-21.7903	0.0204985	0.73279	-0.609062	0	-6.13077e-05	0	0	-0.171651		0.0684825	-66.974	-50.7133	6.94793	0	-0.24775	0	0	-23.5499		0.589012	-7010.42	-8310.53	4021.46	-129.647	-549.201	-25.4874	-13.4179	-1416.71		-586.888	-66.974	-50.7133	6.94793	0	-0.24775	0	0	-23.5499
560	Complex_1	-17.7818	6.28713	4.75286	-3.6409	-4.88755	-0.0271665	0	4.14487		-24.4111	6.50223	1.47279	4.75286	0	0.0107444	0	0	-0.396268		0.662098	-67.9576	-49.7738	5.74033	0	-0.248319	0	0	-23.8579		0.182059	-7079.35	-8271.52	3972.1	-126.183	-544.697	-25.7521	-16.6619	-1434.45		-632.19	-67.9576	-49.7738	5.74033	0	-0.248319	0	0	-23.8579
561	Complex_1	-16.889	8.8805	3.86611	-2.53754	-4.80847	-9.21586e-05	0	0.77791		-23.0674	4.51147	-1.08918	3.86611	0	0.0126611	0	0	0.782866		0.939004	-67.1178	-50.5825	6.54373	0	-0.251389	0	0	-23.1633		0.335628	-7069.81	-8278.07	4010.93	-124.144	-554.45	-23.613	-13.1175	-1443.81		-643.532	-67.1178	-50.5825	6.54373	0	-0.251389	0	0	-23.1633
562	Complex_1	-11.229	7.07655	3.85163	-2.52786	-4.51644	-7.32639e-05	0	1.74619		-16.859	5.14524	-0.780903	3.85163	0	-0.00250005	0	0	0.562685		1.51432	-67.1265	-50.5754	6.54681	0	-0.251387	0	0	-23.1767		0.330287	-7106.66	-8265.45	3981.72	-127.441	-554.897	-28.459	-11.6985	-1448.44		-651.992	-67.1265	-50.5754	6.54681	0	-0.251387	0	0	-23.1767
563	Complex_1	-19.1167	7.51781	1.13791	-2.73514	-4.43608	-0.000342195	0	1.73253		-22.3333	1.23961	0.51881	1.13791	0	0.000798548	0	0	-0.0556951		-0.362208	-67.1573	-50.5781	6.54641	0	-0.251383	0	0	-23.2061		0.331891	-6936.35	-8313.66	4101.9	-127.038	-548.89	-24.1284	-14.1738	-1411.19		-599.171	-67.1573	-50.5781	6.54641	0	-0.251383	0	0	-23.2061
564	Complex_1	-18.6975	10.7854	2.63426	-2.13209	-4.53414	-6.15164e-05	0	-1.91681		-23.534	3.00193	-0.743155	2.63426	0	-0.0105315	0	0	0.528584		0.592776	-67.1572	-50.8551	6.26694	0	-0.216116	0	0	-22.7702		0.417296	-6923.15	-8317.52	4059	-127.028	-545.415	-24.0389	-13.2145	-1406.49		-548.447	-67.1572	-50.8551	6.26694	0	-0.216116	0	0	-22.7702
565	Complex_1	2.72848e-12	1.27329e-11	-9.09495e-13	0	0	0	0	-8.6402e-12		2.27374e-13	0	0	0	0	0	0	0	0		0	-67.1426	-50.5753	6.54558	0	-0.251388	0	0	-23.1927		0.331168	-6994.51	-8318.3	4029.81	-125.906	-545.395	-24.8355	-14.5005	-1397.36		-598.033	-67.1426	-50.5753	6.54558	0	-0.251388	0	0	-23.1927
566	Complex_1	9.09495e-12	1.81899e-12	1.36424e-12	0	-1.13687e-13	0	0	-2.27374e-13		-1.13687e-13	0	0	0	0	0	0	0	0		0	-67.2671	-50.8494	6.2745	0	-0.216258	0	0	-22.8874		0.411429	-6973.68	-8312.95	3988.29	-124.645	-537.237	-28.0646	-15.4001	-1393.14		-550.529	-67.2671	-50.8494	6.2745	0	-0.216258	0	0	-22.8874
567	Complex_1	-0.0246908	1.20541	0.00118919	0	5.71965e-06	0	0	-1.23053		-0.000770289	-0.0197784	-0.00253698	0.00118919	0	5.71965e-06	0	0	-0.0179902		-0.000446116	-67.1488	-50.5706	6.54503	0	-0.251378	0	0	-23.2025		0.330698	-6896.45	-8312.24	4095.9	-124.579	-546.863	-24.1232	-13.5714	-1409.78		-561.194	-67.1488	-50.5706	6.54503	0	-0.251378	0	0	-23.2025
568	Complex_1	-0.0447155	0.99513	-0.000366479	0	-5.72485e-07	0	0	-1.03954		6.35472e-05	-0.0410627	0.000203046	-0.000366479	0	-5.72485e-07	0	0	-0.041211		0.000312215	-67.0021	-50.566	6.54385	0	-0.251395	0	0	-23.0594		0.330885	-7031.59	-8313.1	3998.73	-123.251	-537.553	-24.4602	-13.8093	-1395.54		-622.61	-67.0021	-50.566	6.54385	0	-0.251395	0	0	-23.0594
569	Complex_1	-0.0262636	0.394727	-0.000390029	0	9.55302e-06	0	0	-0.420619		9.72648e-06	-0.025336	0.000269368	-0.000390029	0	9.55302e-06	0	0	-0.0253075		8.25977e-05	-66.2396	-50.9782	7.70874	0	-0.251555	0	0	-23.3698		0.65115	-6955.21	-8365.85	4074.82	-127.808	-549.298	-25.2686	-12.4146	-1372.26		-577.13	-66.2396	-50.9782	7.70874	0	-0.251555	0	0	-23.3698
570	Complex_1	-23.25	10.9221	0.447652	-1.91976	-4.93276	-0.000626374	0	-1.88385		-25.8828	0.661101	-0.115448	0.447652	0	-0.00758694	0	0	0.123936		0.212548	-67.1545	-50.8519	6.26603	0	-0.216088	0	0	-22.769		0.416435	-7025.74	-8416.66	4095.35	-131.519	-557.969	-26.6377	-11.9043	-1351.67		-624.731	-67.1545	-50.8519	6.26603	0	-0.216088	0	0	-22.769
571	Complex_1	-19.5728	10.4889	1.26182	-2.21232	-3.78566	-0.0115219	0	-1.3531		-23.9609	1.01668	-0.717288	1.26182	0	-0.00177403	0	0	0.33453		0.139394	-67.5118	-51.7585	6.5451	0	-0.251335	0	0	-22.5031		0.456031	-7015.42	-8343.47	4044.37	-129.323	-546.085	-26.7223	-11.7978	-1382.84		-619.55	-67.5118	-51.7585	6.5451	0	-0.251335	0	0	-22.5031
572	Complex_1	-15.4909	13.1788	0.93983	-2.35608	-3.90406	-0.0262787	0	-3.73232		-19.5908	1.23133	0.29866	0.93983	0	-0.000765172	0	0	0.0876578		-0.0940501	-67.5091	-51.7602	6.5465	0	-0.251333	0	0	-22.4987		0.454658	-6995.31	-8334.56	4048.55	-129.294	-561.776	-25.5618	-11.543	-1395.99		-585.146	-67.5091	-51.7602	6.5465	0	-0.251333	0	0	-22.4987
573	Complex_1	-19.7069	9.43496	0.565731	-2.63974	-4.18382	-5.97664e-06	0	-2.28332		-20.6007	0.68646	-0.242509	0.565731	0	-0.00393736	0	0	-0.00143007		0.368605	-67.5267	-51.7599	6.54657	0	-0.251343	0	0	-22.5164		0.454392	-6987.36	-8399.82	4099.63	-131.246	-557.975	-26.6209	-11.7393	-1345.27		-614.321	-67.5267	-51.7599	6.54657	0	-0.251343	0	0	-22.5164
574	Complex_1	-23.4117	2.35738	2.39736	-2.48818	-4.67915	-0.595649	0	0.174174		-20.5776	2.77572	-0.891026	2.39736	0	-0.00582192	0	0	0.593296		0.68191	-67.5486	-51.761	6.54549	0	-0.25134	0	0	-22.5381		0.456367	-6995.11	-8391.98	4025.77	-131.922	-554.71	-24.0426	-11.6482	-1353.57		-553.012	-67.5486	-51.761	6.54549	0	-0.25134	0	0	-22.5381
575	Complex_1	-25.0816	-1.45649	2.89424	-2.59095	-4.06231	-0.161232	0	3.16692		-22.8717	3.38288	-0.961188	2.89424	0	-0.00537835	0	0	0.848959		0.606247	-67.5276	-51.7575	6.54401	0	-0.251338	0	0	-22.5192		0.45645	-6905.84	-8323.72	4106.57	-123.813	-541.782	-24.2102	-11.116	-1370.06		-617.694	-67.5276	-51.7575	6.54401	0	-0.251338	0	0	-22.5192
576	Complex_1	-19.9665	7.91909	0.665741	-3.33491	-4.34826	-1.92082e-05	0	-0.0655687		-20.8026	1.17764	-0.260828	0.665741	0	-0.00107893	0	0	-0.00955149		0.783359	-67.4933	-51.7593	6.54665	0	-0.251336	0	0	-22.4837		0.454398	-6864.32	-8326.8	4127.26	-132.305	-545.673	-23.3761	-15.3308	-1384.87		-563.227	-67.4933	-51.7593	6.54665	0	-0.251336	0	0	-22.4837
577	Complex_1	-19.9648	11.8665	0.729046	-2.09971	-4.11022	-0.023331	0	-2.84573		-23.4814	0.568608	-0.177089	0.729046	0	0.00301157	0	0	0.236184		-0.222544	-67.417	-51.7614	6.54464	0	-0.251345	0	0	-22.4061		0.457154	-7134.59	-8348.12	3944.54	-127.467	-556.351	-27.6516	-17.0794	-1388.24		-614.21	-67.417	-51.7614	6.54464	0	-0.251345	0	0	-22.4061
578	Complex_1	-31.7243	-0.513354	1.09778	-3.40797	-5.22868	-0.885329	0	3.30618		-26.0929	2.52897	1.57697	1.09778	0	0.019949	0	0	-1.13501		0.969289	-67.477	-51.7577	6.54541	0	-0.251341	0	0	-22.4687		0.455411	-6912.23	-8294.75	4146.08	-124.354	-550.4	-24.3641	-21.1332	-1410		-633.301	-67.477	-51.7577	6.54541	0	-0.251341	0	0	-22.4687
579	Complex_1	-24.1727	-0.701165	0.87386	-2.45856	-4.27884	-0.291476	0	6.16588		-23.4824	1.18899	0.353998	0.87386	0	-0.00168419	0	0	-0.427213		0.390029	-68.1933	-51.0282	5.72526	0	-0.248267	0	0	-22.9633		0.321136	-6997.11	-8398.83	4050.91	-128.183	-550.271	-25.7815	-15.8491	-1370.15		-558.946	-68.1933	-51.0282	5.72526	0	-0.248267	0	0	-22.9633
580	Complex_1	-25.9744	5.52592	2.02177	-1.33398	-5.1326	-0.834325	0	1.89334		-28.1145	1.82593	-0.538735	2.02177	0	0.00294376	0	0	0.0131115		0.326841	-68.286	-51.0266	5.72693	0	-0.24822	0	0	-23.0579		0.319766	-7027.38	-8338.94	4042.12	-125.926	-551.549	-21.0833	-11.0055	-1377.17		-643.83	-68.286	-51.0266	5.72693	0	-0.24822	0	0	-23.0579
581	Complex_1	-23.4864	1.16375	1.29199	-2.41149	-4.40865	-0.18281	0	4.73045		-23.6697	1.52173	0.377092	1.29199	0	-0.00015934	0	0	-0.364629		0.217442	-68.1195	-51.0386	5.72711	0	-0.248259	0	0	-22.8838		0.324037	-7072.41	-8338.69	3958.55	-123.154	-564.551	-23.2528	-11.5054	-1379.68		-590.128	-68.1195	-51.0386	5.72711	0	-0.248259	0	0	-22.8838
582	Complex_1	3.63798e-12	0	-2.72848e-12	0	0	0	0	7.04858e-12		0	0	0	0	0	0	0	0	0		0	-68.2355	-51.0313	5.72622	0	-0.248255	0	0	-23.0042		0.32207	-7007.27	-8292.98	4011.77	-122.387	-555.95	-26.0323	-9.34881	-1428.6		-583.745	-68.2355	-51.0313	5.72622	0	-0.248255	0	0	-23.0042
583	Complex_1	-0.057478	0.144827	8.7776e-05	0	3.39358e-06	0	0	-0.202207		-0.000188735	-0.0492396	0.000524064	8.7776e-05	0	3.39358e-06	0	0	-0.049684		-0.000170891	-68.2303	-51.0285	5.72562	0	-0.248207	0	0	-22.9999		0.3207	-7086.2	-8351.47	3997.51	-126.16	-559.376	-23.0725	-17.6678	-1389		-616.966	-68.2303	-51.0285	5.72562	0	-0.248207	0	0	-22.9999
584	Complex_1	-30.0352	-2.23715	1.14891	-2.92394	-4.44934	-1.35032	0	6.87871		-27.1021	1.30969	-0.527557	1.14891	0	-0.00451391	0	0	0.141571		0.551289	-68.2628	-51.0339	5.73041	0	-0.248231	0	0	-23.0321		0.321035	-7098.85	-8339.39	3985.61	-127.403	-548.268	-26.5227	-10.5893	-1405.45		-626.842	-68.2628	-51.0339	5.73041	0	-0.248231	0	0	-23.0321
585	Complex_1	-24.7714	-2.56087	1.06077	-2.58771	-3.5977	-0.627897	0	6.04837		-22.5064	1.01584	-0.24792	1.06077	0	-0.00641101	0	0	-0.0577971		0.267193	-68.2782	-51.0322	5.72674	0	-0.248211	0	0	-23.0458		0.321224	-7017.65	-8330.89	4049.79	-125.959	-558.318	-25.6809	-10.1575	-1399.54		-616.892	-68.2782	-51.0322	5.72674	0	-0.248211	0	0	-23.0458
586	Complex_1	-29.2516	4.67459	1.60236	-3.25895	-4.77649	-0.776994	0	3.09779		-29.814	2.38926	2.32809	1.60236	0	-0.00212358	0	0	-1.92785		0.388786	-68.333	-51.0298	5.72846	0	-0.248237	0	0	-23.1034		0.320017	-7010.62	-8343.29	4037.99	-123.38	-545.253	-24.1557	-10.9553	-1390.32		-611.25	-68.333	-51.0298	5.72846	0	-0.248237	0	0	-23.1034
587	Complex_1	-29.248	2.67057	2.07639	-3.04168	-5.07518	-0.548344	0	4.19126		-29.521	3.3653	2.21969	2.07639	0	-0.00246119	0	0	-1.98855		1.06023	-68.3492	-51.0296	5.72921	0	-0.248178	0	0	-23.1201		0.31958	-6994.05	-8300.96	4094.14	-128.392	-560.805	-23.8656	-10.0589	-1404.42		-659.694	-68.3492	-51.0296	5.72921	0	-0.248178	0	0	-23.1201
588	Complex_1	0.00664074	0.509211	0.000163492	0	-9.65196e-07	0	0	-0.502888		0.000155802	0.0073638	-0.00047045	0.000163492	0	-9.65196e-07	0	0	0.00747007		0.000201652	-68.3962	-51.0335	5.72952	0	-0.248203	0	0	-23.163		0.319037	-6911.15	-8364.2	4082.32	-127.715	-555.111	-22.0554	-11.9905	-1388.21		-524.179	-68.3962	-51.0335	5.72952	0	-0.248203	0	0	-23.163
589	Complex_1	-0.000770182	0.635666	4.87786e-05	-1.42109e-14	1.04222e-06	0	0	-0.636496		1.06443e-05	-0.00297367	-0.000309967	4.87786e-05	0	1.04222e-06	0	0	-0.0028005		8.69838e-05	-68.4146	-51.0241	5.72721	0	-0.248199	0	0	-23.1877		0.318251	-6950.39	-8397.22	4079.68	-127.017	-548.582	-20.2934	-11.2071	-1369.05		-556.699	-68.4146	-51.0241	5.72721	0	-0.248199	0	0	-23.1877
590	Complex_1	-31.4976	4.8652	1.21932	-3.50402	-4.89146	-0.0371948	0	2.68022		-31.8296	2.23493	2.48542	1.21932	0	-0.00770437	0	0	-2.08486		0.62276	-68.3298	-51.0368	5.72967	0	-0.248246	0	0	-23.0955		0.321063	-6930.02	-8367.47	4106.25	-131.583	-556.337	-23.4392	-12.5337	-1415.64		-529.261	-68.3298	-51.0368	5.72967	0	-0.248246	0	0	-23.0955
591	Complex_1	-29.3426	-3.67595	3.34365	-3.85995	-5.04039	-0.398994	0	7.38979		-27.1008	5.01449	1.65216	3.34365	0	-0.00643333	0	0	-1.58249		1.6076	-68.2905	-51.0281	5.72874	0	-0.248219	0	0	-23.0609		0.317895	-6905.62	-8357.77	4142.19	-130.165	-554.117	-22.6579	-10.6218	-1402.73		-569.752	-68.2905	-51.0281	5.72874	0	-0.248219	0	0	-23.0609
592	Complex_1	-29.7175	-1.49358	1.14586	-3.75294	-4.43011	-0.0223855	0	5.97269		-27.137	1.9029	2.16939	1.14586	0	-0.00503389	0	0	-1.85736		0.450041	-68.3194	-51.0255	5.72833	0	-0.248205	0	0	-23.0914		0.317436	-7013.32	-8336.45	4094.13	-128.75	-554.338	-25.5447	-11.1368	-1390.62		-660.611	-68.3194	-51.0255	5.72833	0	-0.248205	0	0	-23.0914
593	Complex_1	-26.2394	6.07719	2.44969	-3.63425	-3.86979	-0.777953	0	0.666323		-27.1506	4.13498	2.12597	2.44969	0	-0.00578811	0	0	-1.86555		1.43066	-68.1651	-51.0374	5.73372	0	-0.248227	0	0	-22.9326		0.319324	-6958.32	-8341.07	4101.24	-129.117	-556.063	-26.8783	-15.5383	-1376.61		-614.276	-68.1651	-51.0374	5.73372	0	-0.248227	0	0	-22.9326
594	Complex_1	-29.5446	0.0440962	0.488369	-4.29949	-4.04679	-1.00831	0	3.67429		-24.3968	1.74046	2.17875	0.488369	0	-0.00429604	0	0	-1.58982		0.667462	-68.3842	-51.0223	5.72619	0	-0.248214	0	0	-23.1581		0.318278	-6965.92	-8352.87	4110.29	-129.146	-552.974	-26.8943	-12.3054	-1350.37		-651.648	-68.3842	-51.0223	5.72619	0	-0.248214	0	0	-23.1581
595	Complex_1	-29.7139	1.51242	1.45059	-3.33938	-4.34002	-0.0358595	0	1.7815		-26.7431	2.50086	2.5277	1.45059	0	-0.00559824	0	0	-2.04182		0.569992	-68.2259	-51.0292	5.72595	0	-0.248211	0	0	-22.995		0.320527	-7038.76	-8367	4102.4	-128.94	-559.054	-25.3604	-13.841	-1372.15		-674.81	-68.2259	-51.0292	5.72595	0	-0.248211	0	0	-22.995
596	Complex_1	-24.9962	-2.8634	2.47631	-4.18299	-4.28498	-0.0664676	0	6.49171		-22.5664	3.63005	0.257709	2.47631	0	-0.00587423	0	0	-0.501368		1.40327	-68.4353	-51.0259	5.72723	0	-0.248199	0	0	-23.2081		0.319711	-6988.17	-8328.7	4049.16	-127.365	-554.244	-18.6326	-11.7252	-1375.4		-621.261	-68.4353	-51.0259	5.72723	0	-0.248199	0	0	-23.2081
597	Complex_1	-24.9214	-1.80744	2.68095	-3.86213	-4.25742	-0.827002	0	6.4589		-23.3072	3.16615	0.136243	2.68095	0	0.00660796	0	0	-0.474442		0.816788	-68.3861	-51.0193	5.72541	0	-0.248216	0	0	-23.1611		0.317117	-6845.98	-8343.07	4138.55	-129.414	-549.296	-24.9325	-10.8601	-1377.2		-549.751	-68.3861	-51.0193	5.72541	0	-0.248216	0	0	-23.1611
598	Complex_1	1.45519e-11	-1.81899e-12	-9.09495e-13	2.84217e-14	0	0	0	1.5234e-11		5.68434e-13	0	0	0	0	0	0	0	0		0	-68.3139	-51.036	5.72952	0	-0.24824	0	0	-23.0811		0.321929	-6902.17	-8372.48	4063.39	-122.637	-538.791	-26.0365	-13.6757	-1366.1		-525.834	-68.3139	-51.036	5.72952	0	-0.24824	0	0	-23.0811
599	Complex_1	-26.0017	0.618493	1.38438	-3.9313	-3.7345	-0.207908	0	0.739694		-20.8706	1.93791	-0.808024	1.38438	0	-0.00615698	0	0	0.34856		1.01915	-68.4408	-51.0235	5.72628	0	-0.248193	0	0	-23.2136		0.318229	-7033.41	-8344.2	4031.09	-128.896	-561.292	-25.5824	-10.9179	-1405.71		-587.912	-68.4408	-51.0235	5.72628	0	-0.248193	0	0	-23.2136
600	Complex_1	-22.2483	-1.78265	2.88765	-3.31114	-4.48155	-0.131088	0	6.03138		-21.4609	3.70036	-1.01461	2.88765	0	-0.00442864	0	0	0.323596		1.50816	-68.1786	-51.0293	5.72798	0	-0.248234	0	0	-22.9489		0.319814	-6995.63	-8397.01	4087.98	-129.269	-560.222	-21.4815	-11.2776	-1342.16		-622.192	-68.1786	-51.0293	5.72798	0	-0.248234	0	0	-22.9489
601	Complex_1	-26.3134	7.6534	1.09644	-4.09127	-4.83357	-0.544469	0	-1.37807		-24.2159	1.72788	-0.667355	1.09644	0	-0.00479799	0	0	0.353467		0.950129	-68.3632	-51.0245	5.72595	0	-0.24822	0	0	-23.1361		0.319677	-7051.62	-8332.47	4051.95	-132.296	-555.815	-21.9809	-17.001	-1399.19		-644.829	-68.3632	-51.0245	5.72595	0	-0.24822	0	0	-23.1361
602	Complex_1	-21.2919	0.678396	1.2783	-4.16737	-4.48011	-0.191615	0	3.27178		-17.6813	3.05619	-0.723371	1.2783	0	-0.00871095	0	0	0.23932		2.27065	-68.3014	-51.0325	5.72785	0	-0.248203	0	0	-23.069		0.320503	-7046.26	-8394.56	4073.17	-130.697	-555.261	-20.7781	-13.764	-1376.49		-627.866	-68.3014	-51.0325	5.72785	0	-0.248203	0	0	-23.069
603	Complex_1	-23.6599	1.35103	1.55527	-3.92504	-4.2888	-0.179514	0	3.31351		-21.4864	2.13839	-1.15302	1.55527	0	-0.0032179	0	0	0.530888		1.20847	-68.2184	-51.0296	5.72655	0	-0.248206	0	0	-22.9875		0.320353	-7061.35	-8318.85	4021.05	-129.499	-551.668	-25.6128	-14.9323	-1398.14		-643.705	-68.2184	-51.0296	5.72655	0	-0.248206	0	0	-22.9875
604	Complex_1	-23.6279	5.27432	1.08146	-3.89998	-5.09149	-0.0497032	0	3.27023		-24.2128	2.03216	0.45982	1.08146	0	-0.00184443	0	0	-0.575499		1.06823	-68.2732	-51.0295	5.7265	0	-0.248208	0	0	-23.0431		0.321147	-7026.69	-8332.51	4089.33	-127.34	-559.623	-26.6343	-14.3459	-1386.74		-668.832	-68.2732	-51.0295	5.7265	0	-0.248208	0	0	-23.0431
605	Complex_1	-18.8211	1.47877	0.804418	-3.75083	-4.29187	-0.33923	0	3.05497		-15.7773	2.53901	-1.36426	0.804418	0	-0.00255146	0	0	0.76674		2.33466	-68.2883	-51.0342	5.72947	0	-0.248231	0	0	-23.0557		0.320368	-7146.75	-8281.84	3987.05	-132.403	-559.481	-23.6933	-17.5083	-1418.59		-700.285	-68.2883	-51.0342	5.72947	0	-0.248231	0	0	-23.0557
606	Complex_1	-25.0252	2.73006	1.94651	-3.14968	-4.02809	-0.682881	0	2.52798		-24.3691	2.38026	-0.649591	1.94651	0	-0.00667656	0	0	0.048964		1.04106	-68.3618	-51.0261	5.73057	0	-0.24816	0	0	-23.1347		0.316493	-6944.1	-8339.9	4029.74	-131.584	-553.467	-22.4876	-13.0655	-1393.69		-519.655	-68.3618	-51.0261	5.73057	0	-0.24816	0	0	-23.1347
607	Complex_1	-24.5	-1.76709	3.54258	-3.99017	-4.17967	-1.08061	0	3.12302		-20.148	4.79428	-0.0218672	3.54258	0	-0.00612777	0	0	-0.678401		1.9581	-68.1324	-51.0329	5.72649	0	-0.248212	0	0	-22.8999		0.32213	-7042.38	-8392	4042.46	-129.616	-553.578	-21.9035	-9.34183	-1379.25		-599.149	-68.1324	-51.0329	5.72649	0	-0.248212	0	0	-22.8999
608	Complex_1	-0.0362918	0.43273	0.000439197	0	-3.32714e-06	0	0	-0.469051		-0.000407114	-0.038747	0.000694659	0.000439197	0	-3.32714e-06	0	0	-0.0394829		-0.000394595	-68.196	-51.033	5.72671	0	-0.248233	0	0	-22.9637		0.322237	-7009.16	-8402.03	4047.92	-123.889	-552.609	-23.1881	-10.6879	-1378.67		-566.012	-68.196	-51.033	5.72671	0	-0.248233	0	0	-22.9637
609	Complex_1	-19.9712	4.43641	2.32421	-4.12697	-3.96266	-0.474336	0	0.87152		-19.0393	2.07358	-0.542425	2.32421	0	0.0107543	0	0	0.0256093		0.255434	-68.2325	-51.0321	5.72764	0	-0.248216	0	0	-23.0012		0.321331	-7080.7	-8418.66	3968.06	-131.539	-559.041	-22.2633	-11.6189	-1354.12		-551.516	-68.2325	-51.0321	5.72764	0	-0.248216	0	0	-23.0012
610	Complex_1	-23.2082	3.1581	1.37873	-3.69532	-4.36851	-0.968	0	2.41082		-21.124	2.67962	0.779684	1.37873	0	-0.00703444	0	0	-1.0542		1.58244	-68.2391	-51.0335	5.727	0	-0.248231	0	0	-23.0063		0.321949	-7055.15	-8407.29	4013.96	-124.734	-560.563	-22.9844	-12.788	-1372.95		-567.797	-68.2391	-51.0335	5.727	0	-0.248231	0	0	-23.0063
611	Complex_1	-21.9924	3.91831	0.663443	-3.80906	-4.26116	-0.201511	0	3.35358		-21.656	1.76238	0.698062	0.663443	0	-0.00458042	0	0	-0.770297		1.17575	-68.2351	-51.0372	5.72865	0	-0.248235	0	0	-23.0012		0.322917	-7224.95	-8391.61	3915.92	-127.964	-552.113	-24.2979	-10.0213	-1377		-657.848	-68.2351	-51.0372	5.72865	0	-0.248235	0	0	-23.0012
612	Complex_1	5.45697e-12	-1.81899e-12	1.36424e-12	0	0	0	0	3.86535e-12		6.82121e-13	0	0	0	0	0	0	0	0		0	-68.3141	-51.0318	5.72788	0	-0.248246	0	0	-23.0833		0.321343	-7011.19	-8333.18	4057.31	-123.956	-541.572	-22.6047	-19.9859	-1387.79		-639.407	-68.3141	-51.0318	5.72788	0	-0.248246	0	0	-23.0833
613	Complex_1	-21.7451	-1.41277	3.45777	-2.83501	-3.92531	-0.207946	0	4.465		-21.2869	3.51305	-0.0975349	3.45777	0	0.00639559	0	0	-0.525731		0.672147	-68.2054	-51.0273	5.72716	0	-0.248222	0	0	-22.9763		0.319229	-6995.27	-8357.44	4063.93	-124.974	-547.141	-21.4039	-14.0157	-1402.02		-592.2	-68.2054	-51.0273	5.72716	0	-0.248222	0	0	-22.9763
614	Complex_1	-24.6763	1.05742	0.251311	-3.11479	-4.41467	-0.110883	0	3.02714		-21.3719	1.01199	0.0341521	0.251311	0	-0.00618369	0	0	-0.100368		0.833081	-68.2546	-51.0346	5.7283	0	-0.248236	0	0	-23.0223		0.322259	-6987.59	-8389.12	4071.39	-132.495	-550.394	-21.4362	-12.5585	-1346.84		-606.142	-68.2546	-51.0346	5.7283	0	-0.248236	0	0	-23.0223
615	Complex_1	-27.4758	-2.74512	1.15821	-4.00531	-4.10116	-0.476084	0	5.89755		-23.2039	1.78062	0.387731	1.15821	0	-0.00507521	0	0	-0.775194		1.01495	-68.189	-51.0384	5.72706	0	-0.248254	0	0	-22.9517		0.322297	-7064.83	-8355.97	4084.23	-126.399	-557.114	-20.0329	-16.9508	-1401.33		-671.268	-68.189	-51.0384	5.72706	0	-0.248254	0	0	-22.9517
616	Complex_1	-29.5434	3.48242	2.58754	-3.99518	-4.6357	-1.45365	0	3.74222		-29.2711	3.91808	2.68638	2.58754	0	0.0115448	0	0	-1.97466		0.607269	-68.2606	-51.028	5.7265	0	-0.248213	0	0	-23.0314		0.320593	-7062.01	-8328.72	4037.8	-126.779	-557.05	-24.3432	-13.5043	-1408.04		-641.379	-68.2606	-51.028	5.7265	0	-0.248213	0	0	-23.0314
617	Complex_1	-21.2601	0.982924	1.27946	-4.23389	-4.84889	-0.673806	0	5.75999		-19.5259	2.70356	-1.13639	1.27946	0	-0.00425	0	0	0.722909		1.84184	-68.3128	-51.0249	5.72795	0	-0.248218	0	0	-23.0861		0.318526	-6909.39	-8289.18	4075.57	-130.746	-538.007	-21.4324	-11.504	-1422.57		-571.521	-68.3128	-51.0249	5.72795	0	-0.248218	0	0	-23.0861
618	Complex_1	-27.8424	5.29962	1.3399	-3.66669	-4.22911	-0.619916	0	-0.126898		-25.8393	1.36484	-1.04939	1.3399	0	-0.00271928	0	0	0.181268		0.895784	-68.0653	-51.0361	5.73174	0	-0.248192	0	0	-22.8318		0.31909	-6969.57	-8280.14	4022.57	-128.136	-547.007	-21.2506	-12.286	-1416.3		-587.019	-68.0653	-51.0361	5.73174	0	-0.248192	0	0	-22.8318
619	Complex_1	-23.7543	4.40637	0.615923	-3.03486	-4.48699	-0.259819	0	3.01967		-24.0146	1.26271	-0.254089	0.615923	0	-0.00789078	0	0	0.149905		0.75886	-68.2365	-51.0351	5.73169	0	-0.248186	0	0	-23.0042		0.319389	-6999.08	-8359.23	4088.03	-131.861	-551.585	-20.6243	-14.6408	-1357.84		-651.337	-68.2365	-51.0351	5.73169	0	-0.248186	0	0	-23.0042
620	Complex_1	-25.1393	0.513824	1.13628	-3.70608	-3.9786	-0.155448	0	3.19268		-22.1419	1.74814	-0.319237	1.13628	0	-0.00699698	0	0	-0.234323		1.17241	-68.2755	-51.0354	5.72774	0	-0.24825	0	0	-23.0433		0.323787	-6868.67	-8334.22	4138.57	-131.647	-547.834	-21.4342	-8.77108	-1398.04		-565.296	-68.2755	-51.0354	5.72774	0	-0.24825	0	0	-23.0433
621	Complex_1	-23.205	2.61958	0.875441	-3.59396	-4.1459	-0.0320133	0	4.87302		-23.8012	1.7016	0.0418556	0.875441	0	-0.00727868	0	0	-0.00457536		0.796152	-68.4081	-51.0296	5.72668	0	-0.248254	0	0	-23.1784		0.321427	-6916.86	-8250.76	4125.54	-126.085	-563.181	-22.6456	-20.3587	-1409.45		-649.933	-68.4081	-51.0296	5.72668	0	-0.248254	0	0	-23.1784
622	Complex_1	-22.7329	4.50547	2.72631	-3.36823	-3.60965	-0.0122184	0	3.60189		-26.5764	2.1101	-1.51501	2.72631	0	-0.00335703	0	0	0.738231		0.163931	-68.2872	-51.025	5.72747	0	-0.248221	0	0	-23.0594		0.317995	-7040.29	-8361.6	4062.09	-131.265	-563.737	-19.4357	-17.2017	-1368.2		-640.947	-68.2872	-51.025	5.72747	0	-0.248221	0	0	-23.0594
623	Complex_1	-4.54747e-12	0	-9.09495e-13	0	0	0	0	9.09495e-13		1.13687e-13	0	0	0	0	0	0	0	0		0	-68.1421	-51.0308	5.72765	0	-0.248191	0	0	-22.9106		0.319884	-7027.15	-8367.12	4009.72	-125.694	-551.512	-21.7627	-13.2269	-1384.88		-572.672	-68.1421	-51.0308	5.72765	0	-0.248191	0	0	-22.9106
624	Complex_1	-22.7854	4.10714	2.54806	-3.3346	-4.41032	-1.05346	0	1.4915		-22.1338	3.33238	-1.17854	2.54806	0	0.0206414	0	0	0.760748		1.18147	-68.4399	-51.0294	5.73048	0	-0.248213	0	0	-23.2107		0.318009	-7069.17	-8413.36	4005.18	-128.793	-546.992	-22.5016	-12.1272	-1353.11		-597.453	-68.4399	-51.0294	5.73048	0	-0.248213	0	0	-23.2107
625	Complex_1	-28.3149	5.88584	2.50814	-4.392	-4.57995	-0.182635	0	1.44483		-28.9991	3.72785	2.28859	2.50814	0	-0.0011865	0	0	-2.02191		0.954214	-68.3116	-51.0288	5.72792	0	-0.248229	0	0	-23.0813		0.318883	-7090.8	-8380.63	4046.99	-128.708	-553.947	-23.1537	-16.4057	-1358.59		-676.355	-68.3116	-51.0288	5.72792	0	-0.248229	0	0	-23.0813
626	Complex_1	-30.3882	4.95376	2.19681	-4.27398	-3.64083	-0.0176594	0	-0.18828		-29.4181	2.89645	2.05241	2.19681	0	-0.0048804	0	0	-2.05481		0.706919	-68.201	-51.0296	5.72808	0	-0.248197	0	0	-22.971		0.319598	-7066.09	-8375.84	4062.92	-129.664	-551.41	-22.2811	-10.7868	-1365.68		-673.35	-68.201	-51.0296	5.72808	0	-0.248197	0	0	-22.971
627	Complex_1	-25.7289	4.46368	2.37168	-3.80653	-4.21255	-0.148858	0	2.34594		-26.7423	2.69384	0.24886	2.37168	0	-0.000215662	0	0	-0.667822		0.741337	-68.2871	-51.026	5.72764	0	-0.248204	0	0	-23.059		0.318479	-7091.1	-8411.74	3980.49	-133.225	-550.144	-24.1783	-14.1856	-1345.69		-592.419	-68.2871	-51.026	5.72764	0	-0.248204	0	0	-23.059
628	Complex_1	-21.4401	3.8533	2.18498	-3.55443	-4.09291	-0.0830435	0	1.49523		-21.2432	2.54918	0.0856133	2.18498	0	-0.00700687	0	0	-0.641118		0.926721	-68.2491	-51.0359	5.72749	0	-0.248252	0	0	-23.0163		0.32384	-7040.26	-8372.42	3994.98	-127.519	-556.808	-26.1075	-12.0791	-1380.69		-559.605	-68.2491	-51.0359	5.72749	0	-0.248252	0	0	-23.0163
629	Complex_1	-23.3174	5.96839	1.23638	-3.60489	-3.9116	-0.0196858	0	-0.50096		-22.4851	1.42183	-0.728926	1.23638	0	-0.00593798	0	0	0.236381		0.683939	-68.2651	-51.034	5.72818	0	-0.248213	0	0	-23.0326		0.321539	-6980.02	-8379.85	4093.55	-131.057	-549.103	-20.7487	-8.57206	-1374.91		-609.321	-68.2651	-51.034	5.72818	0	-0.248213	0	0	-23.0326
630	Complex_1	-31.6539	1.76309	1.30365	-3.98536	-4.29434	-0.011052	0	1.61174		-28.0417	2.58148	2.23207	1.30365	0	-0.00857078	0	0	-1.73848		0.792811	-68.3867	-51.0259	5.72802	0	-0.248208	0	0	-23.1591		0.318406	-6923.92	-8362.21	4125.4	-127.749	-550.855	-21.4024	-13.7251	-1396.2		-577.181	-68.3867	-51.0259	5.72802	0	-0.248208	0	0	-23.1591
631	Complex_1	-22.6509	2.6033	1.02488	-3.55018	-4.26827	-0.266298	0	2.13596		-20.3303	1.83422	-0.713652	1.02488	0	0.0054623	0	0	0.452864		1.06467	-68.2293	-51.0256	5.72715	0	-0.24819	0	0	-23.0007		0.318057	-6913.49	-8369.34	4150.65	-128.588	-552.05	-20.0387	-12.6394	-1386.64		-594.845	-68.2293	-51.0256	5.72715	0	-0.24819	0	0	-23.0007
632	Complex_1	-27.7945	5.01538	3.22768	-3.99855	-4.47915	-0.288506	0	1.98616		-29.2575	4.58007	2.04176	3.22768	0	-0.00571696	0	0	-1.95744		1.27379	-68.2831	-51.0376	5.72997	0	-0.248227	0	0	-23.0504		0.323201	-7050.02	-8382.76	4009.63	-130.746	-545.33	-22.3578	-15.2439	-1376.67		-586.553	-68.2831	-51.0376	5.72997	0	-0.248227	0	0	-23.0504
633	Complex_1	-26.3229	-1.73663	0.677597	-3.80315	-3.99944	-0.16543	0	4.99551		-22.2913	1.49237	0.0419032	0.677597	0	-0.00493127	0	0	-0.278229		1.05603	-68.3248	-51.0297	5.72888	0	-0.248203	0	0	-23.0953		0.319486	-6976.82	-8442.6	4078.97	-136.797	-550.581	-19.4034	-12.3002	-1344.73		-549.377	-68.3248	-51.0297	5.72888	0	-0.248203	0	0	-23.0953
634	Complex_1	-32.2303	1.20133	1.62619	-3.75751	-4.4915	-0.0440871	0	1.68615		-28.4508	2.35004	1.79809	1.62619	0	-0.00540526	0	0	-1.77878		0.709953	-68.2323	-51.0251	5.72618	0	-0.24822	0	0	-23.0047		0.319497	-7084.13	-8371.6	3950.6	-129.327	-540.792	-21.0587	-6.39307	-1390.89		-574.674	-68.2323	-51.0251	5.72618	0	-0.24822	0	0	-23.0047
635	Complex_1	-24.9302	1.81277	0.271751	-3.69557	-4.37593	-0.00458724	0	1.81152		-20.7501	1.32248	-0.511118	0.271751	0	-0.00632871	0	0	0.215806		1.35237	-68.4102	-51.0299	5.72852	0	-0.248223	0	0	-23.1808		0.320106	-7079.89	-8359.77	3992.38	-128.021	-560.785	-22.3911	-5.69221	-1389.7		-605.915	-68.4102	-51.0299	5.72852	0	-0.248223	0	0	-23.1808
636	Complex_1	6.36646e-12	0	2.27374e-12	0	-1.13687e-13	0	0	4.54747e-12		0	0	0	0	0	0	0	0	0		0	-68.2998	-51.0358	5.72539	0	-0.248219	0	0	-23.0641		0.322941	-7004.45	-8294.02	4012.01	-122.77	-539.848	-23.4956	-15.7945	-1421.48		-599.049	-68.2998	-51.0358	5.72539	0	-0.248219	0	0	-23.0641
637	Complex_1	-29.4379	2.54763	1.99856	-4.05454	-4.97603	-0.291783	0	3.89138		-28.5531	3.2751	1.55126	1.99856	0	-0.00692572	0	0	-1.41473		1.14693	-68.3575	-51.0313	5.72735	0	-0.248269	0	0	-23.127		0.321752	-7129.95	-8311.58	3971.49	-128.585	-557.928	-22.6645	-13.4782	-1429.01		-638.2	-68.3575	-51.0313	5.72735	0	-0.248269	0	0	-23.127
638	Complex_1	-25.8534	1.90423	1.07309	-3.79947	-4.16715	-0.0066389	0	0.888272		-21.7458	1.5438	-0.928711	1.07309	0	-0.00614654	0	0	0.495815		0.909759	-68.3356	-51.0308	5.72829	0	-0.248257	0	0	-23.106		0.321184	-7067.22	-8363.53	4125.74	-129.971	-550.27	-23.8502	-7.48432	-1401.93		-715.924	-68.3356	-51.0308	5.72829	0	-0.248257	0	0	-23.106
639	Complex_1	-28.3703	8.98915	2.39019	-3.94773	-4.3636	-0.613674	0	-0.926193		-29.8985	3.25571	2.09471	2.39019	0	-0.00178695	0	0	-2.16079		0.933384	-68.1932	-51.0302	5.72819	0	-0.248193	0	0	-22.963		0.320082	-6994.09	-8301.13	4073.07	-128.422	-549.565	-25.3687	-9.03036	-1456.14		-597.5	-68.1932	-51.0302	5.72819	0	-0.248193	0	0	-22.963
640	Complex_1	-32.0412	3.71194	1.8617	-4.09725	-4.48352	-0.0136396	0	1.20311		-30.2235	2.4941	2.2342	1.8617	0	-0.00198132	0	0	-1.97814		0.378321	-68.2147	-51.0414	5.73188	0	-0.248222	0	0	-22.9799		0.322995	-6970.16	-8269.45	4087.07	-124.074	-549.786	-22.3828	-14.4393	-1437.78		-639.32	-68.2147	-51.0414	5.73188	0	-0.248222	0	0	-22.9799
641	Complex_1	-23.0954	4.60073	0.413143	-3.6517	-3.73224	-0.0483382	0	0.707858		-21.3849	0.641948	-0.242006	0.413143	0	-0.00335105	0	0	0.00917085		0.464991	-68.2697	-51.03	5.72908	0	-0.248173	0	0	-23.0404		0.319708	-6988.86	-8332.82	4065.02	-127.057	-545.513	-23.585	-14.7882	-1392.96		-617.164	-68.2697	-51.03	5.72908	0	-0.248173	0	0	-23.0404
642	Complex_1	-28.4371	3.1976	3.25621	-3.73715	-4.58494	-0.765568	0	3.46463		-29.2678	4.29111	1.67259	3.25621	0	-0.00227012	0	0	-1.50416		0.868739	-68.2577	-51.033	5.72743	0	-0.248194	0	0	-23.025		0.321012	-7066.95	-8303.73	4007.91	-126.208	-556.743	-22.5809	-19.2591	-1415.55		-630.783	-68.2577	-51.033	5.72743	0	-0.248194	0	0	-23.025
643	Complex_1	-30.6668	4.41151	1.26797	-3.42608	-4.72747	-1.12068	0	3.25314		-30.3252	1.9096	2.24026	1.26797	0	0.000566104	0	0	-1.97857		0.379377	-68.1916	-51.0337	5.72832	0	-0.248226	0	0	-22.9588		0.3208	-7064.16	-8341.49	4025.3	-127.944	-554.439	-24.524	-15.7751	-1399.7		-625.593	-68.1916	-51.0337	5.72832	0	-0.248226	0	0	-22.9588
644	Complex_1	0.0312576	0.310187	-0.000300032	0	-6.20599e-05	0	0	-0.285433		0.0068663	0.0348713	-0.0125382	-0.000300032	0	-6.20599e-05	0	0	0.0407842		0.00698734	-68.3836	-51.0237	5.7266	0	-0.248194	0	0	-23.1564		0.31814	-6942.28	-8394.73	4135.12	-123.249	-550.832	-21.7436	-16.9398	-1372.23		-597.676	-68.3836	-51.0237	5.7266	0	-0.248194	0	0	-23.1564
645	Complex_1	0.00909208	0.370033	-1.63561e-05	0	1.16835e-05	0	0	-0.359877		-0.00105997	0.0100852	0.00195862	-1.63561e-05	0	1.16835e-05	0	0	0.00905709		-0.000925828	-68.3067	-51.0294	5.72757	0	-0.248191	0	0	-23.0769		0.320167	-6996.71	-8309.12	4075.49	-125.105	-550.072	-20.9586	-17.5095	-1388.51		-660.926	-68.3067	-51.0294	5.72757	0	-0.248191	0	0	-23.0769
646	Complex_1	-0.0215364	0.291331	0.00279823	0	3.55935e-05	0	0	-0.313698		-0.00200311	-0.0153863	0.00270714	0.00279823	0	3.55935e-05	0	0	-0.0190329		-0.00189442	-66.9095	-51.3415	7.00172	0	-0.24829	0	0	-22.42		0.0985796	-6980.22	-8320.09	3987.05	-126.042	-548.743	-22.9469	-15.933	-1393.31		-540.215	-66.9095	-51.3415	7.00172	0	-0.24829	0	0	-22.42
647	Complex_1	-0.0493124	0.394943	-0.00074864	0	1.02171e-05	0	0	-0.443602		8.52388e-05	-0.0486769	0.00164864	-0.00074864	0	1.02171e-05	0	0	-0.0497836		0.000196518	-66.8216	-51.34	7.00584	0	-0.248244	0	0	-22.3351		0.0958987	-7081.5	-8366.09	3977.74	-124.014	-553.171	-22.1647	-19.0437	-1380.95		-593.808	-66.8216	-51.34	7.00584	0	-0.248244	0	0	-22.3351
648	Complex_1	-1.18234e-11	-5.45697e-12	-1.36424e-12	0	0	0	0	-9.09495e-12		4.54747e-13	0	0	0	0	0	0	0	0		0	-66.9168	-51.6721	7.01512	0	-0.248235	0	0	-22.1033		0.0917129	-6974.35	-8383.25	4044.86	-126.568	-550.705	-23.3649	-12.9223	-1362.92		-559.483	-66.9168	-51.6721	7.01512	0	-0.248235	0	0	-22.1033
649	Complex_1	-0.0162499	0.292369	-2.48476e-05	0	4.44794e-06	0	0	-0.308559		-3.9616e-05	-0.0125718	-1.55722e-05	-2.48476e-05	0	4.44794e-06	0	0	-0.012681		0.000145237	-67.9721	-50.1811	5.75568	0	-0.248159	0	0	-23.5728		0.274295	-6948.08	-8354.38	4068.18	-123.387	-542.087	-26.8687	-14.9747	-1376.58		-577.981	-67.9721	-50.1811	5.75568	0	-0.248159	0	0	-23.5728
650	Complex_1	-0.0405577	0.45349	-0.000104066	0	1.06994e-05	0	0	-0.493883		-7.1992e-05	-0.0293389	0.000503431	-0.000104066	0	1.06994e-05	0	0	-0.0299039		0.000154867	-68.075	-50.1757	5.75253	0	-0.248214	0	0	-23.6784		0.2748	-7061.09	-8344.64	4021.32	-122.615	-548.179	-25.4336	-10.4441	-1397.16		-633.927	-68.075	-50.1757	5.75253	0	-0.248214	0	0	-23.6784
651	Complex_1	1.81899e-11	-9.09495e-12	-4.54747e-13	0	-1.13687e-13	0	0	2.34195e-11		-4.54747e-13	0	0	0	0	0	0	0	0		0	-68.128	-50.1782	5.75594	0	-0.248204	0	0	-23.7333		0.275664	-6962.21	-8306.71	4079.02	-123.071	-548.664	-22.1022	-11.9108	-1413.09		-615.68	-68.128	-50.1782	5.75594	0	-0.248204	0	0	-23.7333
652	Complex_1	0.00841279	1.15547	0.000138323	0	-1.12325e-07	0	0	-1.14647		-0.00073372	0.00980243	0.000558531	0.000138323	0	-1.12325e-07	0	0	0.00950758		-0.000401894	-68.1647	-50.1762	5.75392	0	-0.24823	0	0	-23.7698		0.275682	-7072.07	-8350.75	3951.11	-127.502	-552.435	-27.2855	-15.7455	-1375.4		-574.066	-68.1647	-50.1762	5.75392	0	-0.24823	0	0	-23.7698
653	Complex_1	-0.0312001	0.632581	0.000169463	0	1.36431e-06	0	0	-0.663197		-0.000755817	-0.0212116	0.00108797	0.000169463	0	1.36431e-06	0	0	-0.0219771		-0.000493304	-68.1217	-50.1834	5.7524	0	-0.24829	0	0	-23.7228		0.280343	-7038.68	-8382.55	4062.95	-125.54	-554.622	-26.7736	-13.5523	-1397.03		-601.558	-68.1217	-50.1834	5.7524	0	-0.24829	0	0	-23.7228
654	Complex_1	0.0235301	0.511262	4.72894e-05	0	1.26388e-05	0	0	-0.486064		-0.00172769	0.0323948	0.00222156	4.72894e-05	0	1.26388e-05	0	0	0.0315971		-0.00148383	-67.9712	-50.1775	5.75271	0	-0.24821	0	0	-23.5753		0.277091	-7064.38	-8344.36	4032.3	-127.757	-551.323	-26.0994	-16.4312	-1394.16		-636.558	-67.9712	-50.1775	5.75271	0	-0.24821	0	0	-23.5753
655	Complex_1	-0.069048	0.455113	-0.000865014	0	5.70693e-05	0	0	-0.519646		-0.00370688	-0.0555467	0.0126431	-0.000865014	0	5.70693e-05	0	0	-0.063854		-0.0035279	-68.1307	-50.1882	5.75814	0	-0.248235	0	0	-23.7277		0.275366	-7048.86	-8334.86	4014.29	-126.396	-559.432	-23.1901	-16.8645	-1395.86		-606.554	-68.1307	-50.1882	5.75814	0	-0.248235	0	0	-23.7277
656	Complex_1	-0.0110015	1.03098	-0.00022367	0	3.67524e-06	0	0	-1.04121		-0.000548564	0.000928669	0.00101362	-0.00022367	0	3.67524e-06	0	0	0.000465559		-0.000330513	-68.0038	-50.1843	5.75522	0	-0.248251	0	0	-23.6037		0.277308	-7103.33	-8356.88	3988.7	-124.424	-553.632	-21.7942	-14.6543	-1378.45		-642.194	-68.0038	-50.1843	5.75522	0	-0.248251	0	0	-23.6037
657	Complex_1	0.030374	0.757341	1.29903e-05	0	1.26743e-05	0	0	-0.726654		-0.000338495	0.0389099	0.000314533	1.29903e-05	0	1.26743e-05	0	0	0.038652		-8.23436e-05	-68.0833	-50.1772	5.75572	0	-0.248238	0	0	-23.6881		0.274466	-6992.29	-8306.98	4062.71	-124.509	-545.451	-24.538	-12.4562	-1410.86		-630.198	-68.0833	-50.1772	5.75572	0	-0.248238	0	0	-23.6881
658	Complex_1	0.208524	1.25994	-0.00177619	0	8.26009e-06	0	0	-1.0466		-0.00305145	0.210198	0.00483748	-0.00177619	0	8.26009e-06	0	0	0.209782		-0.00265324	-68.3927	-51.0338	5.72915	0	-0.248211	0	0	-23.1619		0.322107	-7032.01	-8331.86	4026.77	-120.433	-545.455	-23.169	-9.28874	-1395.86		-632.714	-68.3927	-51.0338	5.72915	0	-0.248211	0	0	-23.1619
659	Complex_1	-0.00774213	1.06539	5.00872e-05	0	-3.25631e-07	0	0	-1.07181		-0.00137005	0.00712831	0.00187682	5.00872e-05	0	-3.25631e-07	0	0	0.00628935		-0.00108763	-68.4299	-51.0209	5.72667	0	-0.248196	0	0	-23.2043		0.316858	-6980.29	-8334.49	4023.42	-124.945	-559.231	-24.4874	-7.77677	-1417.36		-535.423	-68.4299	-51.0209	5.72667	0	-0.248196	0	0	-23.2043
660	Complex_1	0.024121	1.8564	0.000725581	-1.42109e-14	-3.65024e-05	0	0	-1.83187		-0.00110005	0.034913	-0.00299466	0.000725581	0	-3.65024e-05	0	0	0.0379743		-0.000755695	-68.3147	-51.0261	5.72667	0	-0.248194	0	0	-23.0884		0.321327	-7030.94	-8316.43	4032.43	-123.155	-548.503	-22.3599	-11.7269	-1420.91		-620.28	-68.3147	-51.0261	5.72667	0	-0.248194	0	0	-23.0884
661	Complex_1	-0.00942953	2.27789	-0.000643575	0	-6.25675e-06	0	0	-2.2863		-0.000367499	-0.00432348	0.00144761	-0.000643575	0	-6.25675e-06	0	0	-0.00514619		2.49312e-05	-68.1911	-51.0326	5.73059	0	-0.248173	0	0	-22.959		0.3181	-7056.31	-8304.46	3966.71	-120.594	-547.546	-21.5484	-20.727	-1419.28		-588.866	-68.1911	-51.0326	5.73059	0	-0.248173	0	0	-22.959
662	Complex_1	-0.000948221	2.26399	-0.00106231	0	1.38094e-06	0	0	-2.26248		-0.00139635	0.000910762	0.00466979	-0.00106231	0	1.38094e-06	0	0	-0.00169001		-0.00100808	-68.3026	-51.0287	5.72614	0	-0.248227	0	0	-23.0735		0.321706	-6947.63	-8331.22	4122.34	-123.707	-546.881	-25.2914	-16.3331	-1404.09		-622.441	-68.3026	-51.0287	5.72614	0	-0.248227	0	0	-23.0735
663	Complex_1	0.0945589	2.24296	-7.71434e-05	0	4.39665e-06	0	0	-2.14728		-0.00105098	0.0989773	-0.000784695	-7.71434e-05	0	4.39665e-06	0	0	0.100464		-0.000629534	-68.4057	-51.0207	5.72593	0	-0.248199	0	0	-23.1807		0.317955	-7059.27	-8343.29	4006.91	-122.422	-549.479	-21.3388	-17.2301	-1406.96		-605.462	-68.4057	-51.0207	5.72593	0	-0.248199	0	0	-23.1807
664	Complex_1	-8.18545e-12	1.81899e-12	0	0	0	0	0	-8.6402e-12		-1.13687e-13	0	0	0	0	0	0	0	0		0	-68.1877	-51.0328	5.72773	0	-0.248259	0	0	-22.9549		0.32054	-7054.15	-8343.97	3961.27	-122.264	-555.836	-21.6438	-16.9093	-1366.42		-588.377	-68.1877	-51.0328	5.72773	0	-0.248259	0	0	-22.9549
665	Complex_1	-0.0275248	1.6606	-0.000285609	1.42109e-14	3.81668e-06	0	0	-1.68707		-0.000776008	-0.0110446	0.00153733	-0.000285609	0	3.81668e-06	0	0	-0.0118496		-0.000450564	-68.4199	-51.0246	5.72603	0	-0.248146	0	0	-23.1924		0.319171	-7076	-8330.18	4011.1	-122.594	-561.958	-24.1008	-13.9407	-1404.54		-629.783	-68.4199	-51.0246	5.72603	0	-0.248146	0	0	-23.1924
666	Complex_1	0.0144247	1.13401	0.000960963	0	1.7507e-05	0	0	-1.11859		-0.00197525	0.0276006	0.00150647	0.000960963	0	1.7507e-05	0	0	0.0268287		-0.0017131	-68.4131	-51.0243	5.72732	0	-0.248206	0	0	-23.1856		0.317703	-6935.19	-8300.09	4106.01	-126.257	-553.026	-27.4995	-18.6796	-1410.28		-605.369	-68.4131	-51.0243	5.72732	0	-0.248206	0	0	-23.1856
667	Complex_1	-0.0460857	1.08396	-0.000296747	0	3.76547e-06	0	0	-1.12893		-0.000824819	-0.0342336	0.0011474	-0.000296747	0	3.76547e-06	0	0	-0.0345394		-0.000548625	-68.3252	-51.0335	5.73519	0	-0.248082	0	0	-23.0934		0.314649	-6989.81	-8319.02	4072.53	-124.687	-544.95	-23.6412	-15.5083	-1415.39		-619.146	-68.3252	-51.0335	5.73519	0	-0.248082	0	0	-23.0934
668	Complex_1	-0.00608656	2.02778	-0.000230346	0	-2.75124e-06	0	0	-2.03296		-0.000670115	-0.00550701	0.00114921	-0.000230346	0	-2.75124e-06	0	0	-0.0061756		-0.000247527	-68.2844	-51.0311	5.72865	0	-0.248222	0	0	-23.0525		0.318771	-6969.34	-8361.55	4047.63	-127.05	-544.327	-24.5667	-10.3371	-1379.21		-569.932	-68.2844	-51.0311	5.72865	0	-0.248222	0	0	-23.0525
669	Complex_1	-0.0663149	1.15008	-0.00262834	0	-2.38406e-05	0	0	-1.21292		-0.000823128	-0.0515884	0.00482376	-0.00262834	0	-2.38406e-05	0	0	-0.0532543		-0.000505608	-68.3594	-51.0285	5.73177	0	-0.248145	0	0	-23.1308		0.316275	-6930.92	-8370.9	4112.38	-131.92	-552.062	-24.7703	-11.5324	-1395.05		-557.069	-68.3594	-51.0285	5.73177	0	-0.248145	0	0	-23.1308
670	Complex_1	0.0923985	1.13805	0.000229501	-1.42109e-14	1.00259e-05	0	0	-1.045		-0.000898309	0.105894	0.0010098	0.000229501	0	1.00259e-05	0	0	0.105291		-0.000646297	-68.3234	-51.0276	5.72741	0	-0.248195	0	0	-23.094		0.318931	-6946.07	-8393.48	4071.05	-125.409	-545.723	-23.2064	-12.5363	-1392.54		-524.22	-68.3234	-51.0276	5.72741	0	-0.248195	0	0	-23.094
671	Complex_1	-0.0031196	1.55091	0.000387052	0	2.11761e-07	0	0	-1.55355		-0.000867778	0.00464919	0.000426573	0.000387052	0	2.11761e-07	0	0	0.00440676		-0.000571407	-68.3176	-51.0227	5.7305	0	-0.248093	0	0	-23.0927		0.315385	-6946.28	-8315.84	4056.85	-125.877	-543.005	-20.8167	-8.05199	-1439.49		-550.052	-68.3176	-51.0227	5.7305	0	-0.248093	0	0	-23.0927
672	Complex_1	-0.036222	2.01866	-9.78919e-05	0	-3.56702e-06	0	0	-2.0544		-0.00038787	-0.0397529	-7.02962e-05	-9.78919e-05	0	-3.56702e-06	0	0	-0.0396004		1.92669e-05	-68.2191	-51.0333	5.72648	0	-0.248223	0	0	-22.9861		0.321989	-7009.4	-8306.06	4077.83	-122.726	-554.755	-25.8052	-8.40004	-1433.01		-636.478	-68.2191	-51.0333	5.72648	0	-0.248223	0	0	-22.9861
673	Complex_1	0.013297	2.47418	-0.000463733	1.42109e-14	-1.40728e-05	0	0	-2.46069		0.000278198	0.00370381	-3.98849e-05	-0.000463733	0	-1.40728e-05	0	0	0.00350334		0.000718167	-68.3793	-51.0302	5.72826	0	-0.248222	0	0	-23.1482		0.319141	-6963.56	-8317.22	4099.6	-125.053	-541.55	-24.5145	-10.6818	-1434.03		-610.108	-68.3793	-51.0302	5.72826	0	-0.248222	0	0	-23.1482
674	Complex_1	-0.0505894	1.50646	-0.0008378	0	-2.25507e-05	0	0	-1.55635		0.000161865	-0.0400571	0.000134637	-0.0008378	0	-2.25507e-05	0	0	-0.0398619		0.000530467	-68.3438	-51.033	5.73165	0	-0.248209	0	0	-23.1112		0.316937	-7037.31	-8341.36	4030.12	-126.728	-542.471	-22.7697	-13.1777	-1412.79		-608.139	-68.3438	-51.033	5.73165	0	-0.248209	0	0	-23.1112
675	Complex_1	-0.0118843	1.55889	-0.000556583	0	5.93818e-06	0	0	-1.57007		-0.000145947	-0.00258612	0.000650263	-0.000556583	0	5.93818e-06	0	0	-0.00288731		0.000201571	-68.304	-51.0209	5.7298	0	-0.248124	0	0	-23.079		0.314228	-7002.4	-8321.45	4062.95	-124.72	-548.119	-23.868	-9.43362	-1416.78		-620.987	-68.304	-51.0209	5.7298	0	-0.248124	0	0	-23.079
676	Complex_1	-27.3969	3.77605	1.8166	-3.23531	-4.65872	-0.692388	0	5.76536		-30.1684	2.45539	2.00581	1.8166	0	0.00686173	0	0	-1.64751		0.273623	-68.3226	-51.0322	5.73027	0	-0.248273	0	0	-23.0903		0.317875	-6980.83	-8263.59	4077.15	-125.728	-552.853	-26.9903	-9.21348	-1449.62		-629.978	-68.3226	-51.0322	5.73027	0	-0.248273	0	0	-23.0903
677	Complex_1	-0.00937217	0.350384	0.00016769	1.42109e-14	-6.41925e-06	0	0	-0.360261		0.00034303	-0.00868402	-0.00103201	0.00016769	0	-6.41925e-06	0	0	-0.00821391		0.000400633	-68.3434	-51.0277	5.72915	0	-0.248194	0	0	-23.1143		0.317624	-6988.55	-8341.85	4066.45	-126.386	-549.1	-26.3037	-11.6	-1405.99		-593.777	-68.3434	-51.0277	5.72915	0	-0.248194	0	0	-23.1143
678	Complex_1	-18.6897	-0.0342676	4.82605	-4.02255	-3.97754	-0.302115	0	1.77344		-16.9527	5.85067	-0.890406	4.82605	0	-0.00808489	0	0	0.0447236		1.87838	-68.2842	-51.0307	5.72844	0	-0.248236	0	0	-23.0537		0.319871	-6969.54	-8320.17	4102.97	-128.106	-551.559	-24.8884	-11.2919	-1431.54		-604.96	-68.2842	-51.0307	5.72844	0	-0.248236	0	0	-23.0537
679	Complex_1	-28.2858	0.640105	2.24857	-4.00674	-3.70287	-0.0137537	0	3.15985		-26.611	3.15811	1.90647	2.24857	0	-0.00147131	0	0	-1.43462		0.439166	-68.3498	-51.0355	5.73029	0	-0.248195	0	0	-23.1162		0.31977	-7014.24	-8373.65	4028.97	-133.397	-554.996	-24.25	-9.51365	-1385.69		-561.713	-68.3498	-51.0355	5.73029	0	-0.248195	0	0	-23.1162
680	Complex_1	-25.8658	6.64673	3.64124	-3.26726	-4.90088	-0.273666	0	1.47468		-29.1867	4.9621	1.63538	3.64124	0	-0.00749137	0	0	-1.64004		1.33301	-68.3226	-51.0276	5.72733	0	-0.248215	0	0	-23.0933		0.319223	-6978.59	-8327.94	4110.73	-127.593	-544.069	-22.7885	-7.64341	-1413.44		-645.844	-68.3226	-51.0276	5.72733	0	-0.248215	0	0	-23.0933
681	Complex_1	-27.0208	-0.309531	2.44909	-4.33341	-4.25737	-0.0749622	0	2.21527		-22.7099	2.52022	-0.397778	2.44909	0	-0.00453991	0	0	-0.178554		0.651993	-68.3956	-51.0305	5.7296	0	-0.248196	0	0	-23.1648		0.318332	-6997.32	-8299.67	4108.22	-126.188	-555.423	-21.6293	-11.9184	-1436.32		-654.39	-68.3956	-51.0305	5.7296	0	-0.248196	0	0	-23.1648
682	Complex_1	-27.7258	1.49097	1.12234	-3.72787	-4.55038	-0.232249	0	3.00861		-24.8372	1.44625	0.0596158	1.12234	0	-0.00517608	0	0	-0.370098		0.639573	-68.3651	-51.0279	5.72652	0	-0.248208	0	0	-23.1354		0.32001	-7029.38	-8376.63	4055.58	-131.068	-555.337	-25.972	-17.4161	-1380.78		-597.748	-68.3651	-51.0279	5.72652	0	-0.248208	0	0	-23.1354
683	Complex_1	-23.5932	-0.211015	1.25087	-3.66065	-4.01789	-0.0522661	0	3.59586		-20.4981	1.22778	-0.238987	1.25087	0	-0.00333764	0	0	-0.329423		0.548651	-68.2091	-51.03	5.72854	0	-0.248192	0	0	-22.9783		0.318851	-7064.14	-8381.57	4060.59	-128.918	-553.002	-21.1733	-9.91706	-1380.17		-649.967	-68.2091	-51.03	5.72854	0	-0.248192	0	0	-22.9783
684	Complex_1	-17.1014	4.2847	2.32085	-3.54743	-4.76764	-1.35757	0	1.40639		-15.4407	3.75095	-0.526666	2.32085	0	0.0138411	0	0	0.119813		1.82311	-68.3165	-51.026	5.72725	0	-0.248213	0	0	-23.0881		0.31861	-7059.32	-8336.18	4026.45	-125.332	-555.775	-22.4744	-8.4559	-1411.62		-625.926	-68.3165	-51.026	5.72725	0	-0.248213	0	0	-23.0881
685	Complex_1	-27.4678	0.730121	1.29376	-4.03145	-4.64182	-0.572082	0	1.93281		-22.1791	1.36745	0.325317	1.29376	0	0.00343226	0	0	-0.482977		0.227919	-68.345	-51.0221	5.72811	0	-0.248159	0	0	-23.1182		0.315331	-7091.81	-8313.4	4016.95	-130.595	-558.217	-26.0873	-17.2719	-1413.77		-649.419	-68.345	-51.0221	5.72811	0	-0.248159	0	0	-23.1182
686	Complex_1	-19.2782	5.89161	1.16102	-3.54758	-4.95477	-0.717164	0	0.380381		-17.4917	1.99821	0.504538	1.16102	0	0.00470188	0	0	-0.495325		0.82328	-68.3483	-51.0255	5.72732	0	-0.248234	0	0	-23.1214		0.319557	-7041.94	-8365.88	4084.22	-131.285	-552.951	-24.7383	-11.5197	-1383.11		-656.682	-68.3483	-51.0255	5.72732	0	-0.248234	0	0	-23.1214
687	Complex_1	-0.0160132	0.420607	-0.00100759	0	8.75627e-07	0	0	-0.437702		0.00208864	-0.0183399	-0.0016976	-0.00100759	0	8.75627e-07	0	0	-0.0177449		0.00210931	-68.422	-51.0248	5.72865	0	-0.248222	0	0	-23.1956		0.317923	-7033.38	-8328.71	4073.16	-124.16	-557.946	-24.3403	-12.9403	-1416.42		-642.014	-68.422	-51.0248	5.72865	0	-0.248222	0	0	-23.1956
688	Complex_1	-28.088	6.4236	3.79351	-4.51054	-4.46231	-0.127663	0	0.0386944		-29.2433	5.22301	2.21309	3.79351	0	-0.00525658	0	0	-1.91134		1.13302	-68.2322	-51.0299	5.72702	0	-0.248206	0	0	-23.0014		0.320304	-7104.95	-8323.03	4040.52	-124.843	-548.83	-22.252	-19.4004	-1397.24		-709.879	-68.2322	-51.0299	5.72702	0	-0.248206	0	0	-23.0014
689	Complex_1	2.00089e-11	1.81899e-12	4.54747e-13	0	1.13687e-13	0	0	1.90994e-11		1.13687e-13	0	0	0	0	0	0	0	0		0	-68.2939	-51.0294	5.7292	0	-0.248199	0	0	-23.0634		0.317919	-7031.13	-8319.89	4029.2	-124.166	-545.835	-22.6071	-16.7747	-1397.93		-633.128	-68.2939	-51.0294	5.7292	0	-0.248199	0	0	-23.0634
690	Complex_1	-24.1119	4.12157	0.40724	-3.70373	-4.7265	-0.0928963	0	0.845441		-20.963	1.50905	0.212469	0.40724	0	-0.00468672	0	0	-0.0253648		0.91939	-68.338	-51.0297	5.73063	0	-0.248197	0	0	-23.1084		0.317687	-6909.8	-8380.5	4182.55	-126.963	-543.311	-21.4991	-13.9105	-1385.9		-620.268	-68.338	-51.0297	5.73063	0	-0.248197	0	0	-23.1084
691	Complex_1	-23.5625	0.43168	1.91914	-3.95314	-4.203	-0.0705647	0	4.34233		-22.029	2.45856	0.0325023	1.91914	0	-0.00538466	0	0	-0.508027		1.02032	-68.2959	-51.0261	5.72588	0	-0.248215	0	0	-23.0673		0.319852	-7021.17	-8395.57	4072.53	-129.251	-543.602	-20.647	-15.6398	-1377.54		-611.444	-68.2959	-51.0261	5.72588	0	-0.248215	0	0	-23.0673
692	Complex_1	-28.4077	0.886505	1.61931	-4.35745	-3.8192	-0.163531	0	1.58766		-24.161	1.89993	0.517422	1.61931	0	-0.0063853	0	0	-0.80949		0.579073	-68.3232	-51.0424	5.73175	0	-0.248214	0	0	-23.0861		0.32178	-7096.37	-8380.49	4026.01	-133.768	-561.988	-22.9187	-13.9472	-1380.88		-628.384	-68.3232	-51.0424	5.73175	0	-0.248214	0	0	-23.0861
693	Complex_1	-25.6449	1.58815	0.872052	-2.91248	-4.43507	-0.303336	0	1.62096		-22.0752	1.295	-0.0782057	0.872052	0	-0.00321896	0	0	-0.457391		0.961766	-68.1959	-51.037	5.72844	0	-0.248265	0	0	-22.9629		0.323841	-7024.31	-8341.4	4049.41	-128.578	-548.09	-19.6401	-19.7803	-1415.77		-600.457	-68.1959	-51.037	5.72844	0	-0.248265	0	0	-22.9629
694	Complex_1	-26.7178	0.399089	1.94489	-3.6563	-4.5735	-0.0528744	0	1.73696		-22.5161	2.44799	-0.180677	1.94489	0	-0.00461328	0	0	-0.283523		0.971914	-68.3083	-51.0444	5.72931	0	-0.248322	0	0	-23.0678		0.322853	-6986.65	-8416.28	4105.52	-132.075	-545.351	-23.7313	-16.0132	-1386.44		-572.283	-68.3083	-51.0444	5.72931	0	-0.248322	0	0	-23.0678
695	Complex_1	-25.5955	-0.286351	0.971512	-3.76779	-4.53192	-0.917906	0	5.64569		-22.7087	2.81617	1.51246	0.971512	0	-0.00438619	0	0	-1.32649		1.66308	-68.3351	-51.0269	5.72653	0	-0.248211	0	0	-23.1064		0.319966	-7010.01	-8303.81	4096.74	-125.154	-546.973	-21.2516	-12.1872	-1437.38		-659.986	-68.3351	-51.0269	5.72653	0	-0.248211	0	0	-23.1064
696	Complex_1	0.0724159	2.32899	0.00149665	0	-2.51028e-05	0	0	-2.25715		-0.000893306	0.0530878	-0.00166702	0.00149665	0	-2.51028e-05	0	0	0.05372		-0.000436762	-68.3149	-51.0272	5.72692	0	-0.248204	0	0	-23.086		0.319545	-6970.34	-8381.28	4049.74	-129.096	-544.087	-19.2188	-10.6977	-1395.16		-540.539	-68.3149	-51.0272	5.72692	0	-0.248204	0	0	-23.086
697	Complex_1	-0.018865	2.40648	5.13003e-05	0	-4.21149e-06	0	0	-2.4246		-0.000795089	-0.019813	0.000556224	5.13003e-05	0	-4.21149e-06	0	0	-0.0201065		-0.000309844	-68.2652	-51.0328	5.72842	0	-0.248234	0	0	-23.0331		0.320467	-6968.21	-8390.07	4067.78	-130.31	-550.58	-18.1232	-16.5034	-1391.72		-538.677	-68.2652	-51.0328	5.72842	0	-0.248234	0	0	-23.0331
698	Complex_1	0.110504	2.2934	0.000341337	0	-3.39682e-05	0	0	-2.18261		-0.000595764	0.0906265	-0.000194206	0.000341337	0	-3.39682e-05	0	0	0.0906706		-0.000157256	-68.4404	-51.0258	5.72777	0	-0.248188	0	0	-23.2123		0.318167	-6889.35	-8365.92	4143.9	-126.83	-543.503	-23.5355	-11.3913	-1377.38		-584.696	-68.4404	-51.0258	5.72777	0	-0.248188	0	0	-23.2123
699	Complex_1	-27.1457	1.67762	2.19136	-2.98335	-4.68439	-1.06245	0	6.31006		-28.5945	3.07651	2.08406	2.19136	0	0.00914462	0	0	-1.85303		0.644969	-68.2912	-51.027	5.7306	0	-0.248128	0	0	-23.0638		0.317153	-6988.35	-8337.36	4066.03	-125.259	-541.106	-24.5714	-11.5035	-1405.51		-609.076	-68.2912	-51.027	5.7306	0	-0.248128	0	0	-23.0638
700	Complex_1	-30.4904	-1.95928	1.87012	-2.75754	-4.18674	-0.695597	0	6.68496		-29.4464	2.1002	-0.412663	1.87012	0	-0.00236822	0	0	0.00392598		0.641182	-68.0684	-50.1783	5.7552	0	-0.248226	0	0	-23.672		0.274915	-7057.11	-8346.72	4074.04	-127.514	-552.283	-26.304	-7.83871	-1411.14		-659.344	-68.0684	-50.1783	5.7552	0	-0.248226	0	0	-23.672
701	Complex_1	-22.4321	1.26852	1.65504	-2.81353	-4.48939	-0.0405168	0	5.9983		-24.0106	3.18312	1.86493	1.65504	0	-0.00530277	0	0	-1.39929		1.06774	-68.2189	-51.0317	5.72819	0	-0.248242	0	0	-22.9874		0.320273	-7058.88	-8332.33	3983.51	-126.336	-550.502	-22.0302	-6.40487	-1395.42		-609.369	-68.2189	-51.0317	5.72819	0	-0.248242	0	0	-22.9874
702	Complex_1	-27.3091	-0.589009	0.740857	-3.14674	-4.51391	-0.101222	0	6.22264		-25.9217	0.793653	-0.408136	0.740857	0	-0.00321145	0	0	0.0562087		0.407934	-68.2834	-51.0311	5.72739	0	-0.248234	0	0	-23.0523		0.320853	-7032.33	-8315.51	4058.9	-126.819	-553.573	-26.111	-13.9103	-1404.73		-650.575	-68.2834	-51.0311	5.72739	0	-0.248234	0	0	-23.0523
703	Complex_1	-24.7089	0.491623	1.16964	-2.71972	-4.31872	-0.89801	0	7.29741		-25.7311	1.38201	0.383286	1.16964	0	0.00160371	0	0	-0.669438		0.496921	-68.3058	-51.0282	5.72684	0	-0.248206	0	0	-23.0759		0.319694	-7016.74	-8330.86	4058.86	-127.166	-547.849	-26.3485	-9.54438	-1414.28		-619.556	-68.3058	-51.0282	5.72684	0	-0.248206	0	0	-23.0759
704	Complex_1	-26.4408	4.04686	1.83077	-2.3078	-4.30593	-0.755638	0	4.35261		-29.3017	2.56865	2.34892	1.83077	0	0.00174777	0	0	-2.16526		0.552463	-68.3174	-51.0297	5.72817	0	-0.248222	0	0	-23.0872		0.319566	-7033.95	-8309.69	4036.59	-127.796	-548.903	-25.3534	-8.15127	-1412.65		-637.992	-68.3174	-51.0297	5.72817	0	-0.248222	0	0	-23.0872
705	Complex_1	-26.7176	6.66131	1.11852	-2.7104	-4.68347	-1.07452	0	4.56981		-30.5989	0.802961	0.0458196	1.11852	0	0.00792073	0	0	-0.233384		-0.135914	-68.3404	-51.0305	5.73057	0	-0.248219	0	0	-23.11		0.317726	-7131.72	-8280.18	4031.17	-127.583	-547.644	-25.0111	-9.40628	-1435.95		-737.124	-68.3404	-51.0305	5.73057	0	-0.248219	0	0	-23.11
706	Complex_1	-26.1562	-2.72622	1.8556	-2.67985	-4.20037	-0.778931	0	9.07588		-26.7023	2.12114	-0.455774	1.8556	0	-0.00237798	0	0	-0.0521567		0.775842	-68.3092	-51.0268	5.72745	0	-0.248185	0	0	-23.0807		0.319047	-7039.99	-8307.53	4034.69	-123.832	-551.024	-26.3591	-21.5489	-1415.05		-629.345	-68.3092	-51.0268	5.72745	0	-0.248185	0	0	-23.0807
707	Complex_1	-21.1743	-2.13334	2.04191	-3.95682	-4.0821	-0.236684	0	7.1412		-19.9484	4.21392	1.57406	2.04191	0	-0.0064722	0	0	-1.32814		1.93257	-68.3109	-51.0296	5.7293	0	-0.248218	0	0	-23.0797		0.317286	-7026.62	-8295.79	4011.14	-131.146	-547.843	-25.1052	-19.7868	-1412.34		-605.754	-68.3109	-51.0296	5.7293	0	-0.248218	0	0	-23.0797
708	Complex_1	-27.2887	1.45717	1.22152	-3.33022	-4.47428	-0.483615	0	8.84383		-30.5231	1.56417	0.128229	1.22152	0	-0.00122902	0	0	-0.344211		0.559858	-68.2638	-51.028	5.72913	0	-0.24822	0	0	-23.0341		0.317398	-6932.92	-8381.35	4131.88	-130.884	-544.938	-22.9514	-17.4561	-1355.33		-611.892	-68.2638	-51.028	5.72913	0	-0.24822	0	0	-23.0341
709	Complex_1	-26.2936	3.59982	2.11328	-2.92442	-4.60972	-1.11219	0	6.41756		-29.7779	2.31233	0.612865	2.11328	0	0.00820798	0	0	-0.631524		0.209505	-68.334	-51.0324	5.73027	0	-0.248173	0	0	-23.1005		0.316857	-7019.13	-8308.88	4024.43	-130.286	-542.878	-24.898	-13.2064	-1391.36		-632.051	-68.334	-51.0324	5.73027	0	-0.248173	0	0	-23.1005
710	Complex_1	-23.8518	2.24006	1.1345	-3.36041	-4.2252	-0.463283	0	7.55547		-26.733	1.69897	1.5171	1.1345	0	0.00843484	0	0	-1.0898		0.12873	-68.3025	-51.031	5.7284	0	-0.248238	0	0	-23.072		0.320304	-6946.16	-8313.33	4106.97	-129.739	-561.761	-23.3366	-18.8439	-1389.71		-616.41	-68.3025	-51.031	5.7284	0	-0.248238	0	0	-23.072
711	Complex_1	-23.4975	3.14408	1.65063	-2.88017	-4.68424	-0.262193	0	7.42645		-27.8921	1.99902	-0.415255	1.65063	0	-0.000404821	0	0	-0.000591271		0.764646	-68.3681	-51.0284	5.7281	0	-0.248202	0	0	-23.1382		0.318604	-6965.86	-8363.13	4115.33	-127.426	-551.591	-24.9674	-12.7121	-1409.82		-591.526	-68.3681	-51.0284	5.7281	0	-0.248202	0	0	-23.1382
712	Complex_1	-27.4871	2.89283	1.52752	-2.92384	-4.45773	-0.857705	0	5.98454		-29.6527	1.40728	-0.354576	1.52752	0	0.00309772	0	0	0.0612		0.17004	-68.3563	-51.0312	5.72747	0	-0.248274	0	0	-23.1267		0.322338	-7189.54	-8340.3	3965.61	-130.645	-544.498	-25.3177	-12.9095	-1425.93		-675.554	-68.3563	-51.0312	5.72747	0	-0.248274	0	0	-23.1267
713	Complex_1	-27.8817	-2.67959	1.73595	-2.72978	-4.86844	-1.17711	0	9.90874		-28.0715	1.76256	-0.2879	1.73595	0	0.00307953	0	0	-0.133571		0.445002	-68.347	-51.0272	5.72656	0	-0.248188	0	0	-23.1184		0.320296	-7100.88	-8296.14	4001.88	-131.763	-546.903	-25.039	-16.0257	-1415.04		-671.852	-68.347	-51.0272	5.72656	0	-0.248188	0	0	-23.1184
714	Complex_1	-1.18306	4.16427	-1.08864	0	-0.000537172	0	0	-3.93306		-0.325091	-1.20552	1.7349	-1.08864	0	-0.000537172	0	0	-1.52666		-0.324576	-67.0973	-52.7664	6.81653	0	-0.247679	0	0	-21.5454		0.64569	-6910.24	-8309.58	4164.88	-125.786	-543.497	-23.0093	-16.4928	-1423.55		-633.208	-67.0973	-52.7664	6.81653	0	-0.247679	0	0	-21.5454
715	Complex_1	-0.0384959	2.31965	0.000739856	0	-2.99038e-05	0	0	-2.36014		0.00128244	-0.0705439	-0.00425738	0.000739856	0	-2.99038e-05	0	0	-0.0688437		0.00184716	-68.2784	-51.0269	5.72681	0	-0.248195	0	0	-23.05		0.31985	-7030.34	-8278.2	4071.87	-122.129	-538.22	-25.3331	-18.6889	-1441.6		-678.038	-68.2784	-51.0269	5.72681	0	-0.248195	0	0	-23.05
716	Complex_1	0.0137803	1.85907	-0.00438326	0	-3.67636e-05	0	0	-1.84709		0.00621871	0.00193476	-0.00814069	-0.00438326	0	-3.67636e-05	0	0	0.00786734		0.00662815	-66.9842	-51.3225	7.0128	0	-0.248177	0	0	-22.5128		0.0864786	-6992.38	-8272.01	4019.19	-121.23	-549.645	-24.1901	-18.4305	-1439.22		-586.853	-66.9842	-51.3225	7.0128	0	-0.248177	0	0	-22.5128
717	Complex_1	-0.0299305	1.46588	0.00195217	0	-5.88576e-06	0	0	-1.50029		0.00253126	-0.0425597	-0.00929544	0.00195217	0	-5.88576e-06	0	0	-0.0380583		0.00284774	-66.9933	-51.6737	7.01644	0	-0.248238	0	0	-22.1797		0.0918895	-6893.18	-8273.51	4157.6	-123.386	-544.426	-20.8939	-11.8746	-1420.25		-656.438	-66.9933	-51.6737	7.01644	0	-0.248238	0	0	-22.1797
718	Complex_1	-1.09139e-11	0	-9.09495e-13	-1.42109e-14	0	0	0	-8.6402e-12		4.54747e-13	0	0	0	0	0	0	0	0		0	-66.9038	-51.3283	7.00506	0	-0.24822	0	0	-22.4245		0.092111	-6997.42	-8361.53	4116.54	-127.666	-544.902	-24.2696	-10.9427	-1430.96		-613.699	-66.9038	-51.3283	7.00506	0	-0.24822	0	0	-22.4245
719	Complex_1	-28.3357	3.71525	2.05267	-3.02475	-4.61497	-0.609862	0	4.88213		-30.7362	2.77553	2.27397	2.05267	0	0.0038633	0	0	-2.01192		0.456943	-68.2728	-51.0295	5.7275	0	-0.248193	0	0	-23.0417		0.319124	-6934.6	-8387.86	4123.59	-130.398	-544.671	-26.5228	-10.1967	-1403.46		-555.078	-68.2728	-51.0295	5.7275	0	-0.248193	0	0	-23.0417
720	Complex_1	-28.5516	1.77464	1.22377	-4.01398	-3.99288	-0.033463	0	3.01848		-26.5281	2.37322	2.56215	1.22377	0	-0.00907871	0	0	-2.07759		0.673975	-68.2689	-51.0275	5.72896	0	-0.248219	0	0	-23.0397		0.317558	-7080.14	-8302.81	4000.96	-131.485	-547.788	-25.658	-12.485	-1415.19		-645.685	-68.2689	-51.0275	5.72896	0	-0.248219	0	0	-23.0397
721	Complex_1	-22.1613	6.25302	2.90172	-2.6996	-4.03957	-0.171206	0	-2.68018		-21.7255	3.20569	-0.158464	2.90172	0	0.000922252	0	0	0.153517		0.307992	-68.4032	-51.0273	5.72818	0	-0.248219	0	0	-23.175		0.31906	-7031.18	-8332.48	4023.62	-127.65	-547.357	-24.9901	-10.8342	-1396.44		-615.039	-68.4032	-51.0273	5.72818	0	-0.248219	0	0	-23.175
722	Complex_1	-19.6873	10.0285	2.60959	-2.65291	-4.57719	-0.419224	0	-3.90801		-20.768	3.4063	-0.471379	2.60959	0	-0.00649711	0	0	-0.188202		1.46279	-68.2903	-51.0332	5.7282	0	-0.248213	0	0	-23.0583		0.321265	-6995.89	-8280.15	4065.8	-122.311	-545.224	-25.9344	-6.88779	-1428.17		-653.012	-68.2903	-51.0332	5.7282	0	-0.248213	0	0	-23.0583
723	Complex_1	-27.8852	3.36	2.13537	-3.24555	-4.4754	-1.05968	0	5.12691		-29.7269	3.14043	2.49714	2.13537	0	0.00459943	0	0	-1.9524		0.455717	-68.3177	-51.0211	5.72442	0	-0.248224	0	0	-23.093		0.320151	-7023.51	-8351.03	4078.58	-129.658	-547.179	-27.2213	-13.1842	-1401.45		-632.365	-68.3177	-51.0211	5.72442	0	-0.248224	0	0	-23.093
724	Complex_1	-27.3172	4.55381	2.92257	-3.31209	-5.27682	-0.458825	0	2.90576		-28.6516	4.74698	2.14199	2.92257	0	-0.00727787	0	0	-1.69618		1.38587	-68.3977	-51.0263	5.72606	0	-0.248216	0	0	-23.1694		0.32015	-7032.38	-8319.47	4086.29	-125.24	-548.995	-25.8013	-11.4347	-1426.44		-661.29	-68.3977	-51.0263	5.72606	0	-0.248216	0	0	-23.1694
725	Complex_1	-23.9167	-0.711166	2.8351	-3.66128	-4.15479	-0.202603	0	1.48356		-19.5055	3.67738	-1.34488	2.8351	0	-0.00627478	0	0	0.491471		1.70196	-68.3261	-51.0373	5.72957	0	-0.248229	0	0	-23.089		0.318774	-7062.3	-8382.84	4037.24	-130.482	-547.195	-26.8163	-14.5354	-1371.49		-626.185	-68.3261	-51.0373	5.72957	0	-0.248229	0	0	-23.089
726	Complex_1	-28.5228	4.1945	1.60238	-3.37907	-4.9552	-1.29725	0	3.81328		-28.5015	2.4536	2.19099	1.60238	0	-0.00176823	0	0	-1.92018		0.582185	-68.2722	-51.0321	5.72802	0	-0.248227	0	0	-23.0407		0.320866	-7106.37	-8336.71	4053.84	-129.22	-551.708	-28.3533	-12.6491	-1399.18		-702.388	-68.2722	-51.0321	5.72802	0	-0.248227	0	0	-23.0407
727	Complex_1	-28.9603	-2.67593	0.381976	-3.92451	-4.06518	-1.22271	0	6.62981		-24.0837	1.27689	1.28532	0.381976	0	-0.00259642	0	0	-0.988115		0.600307	-68.1885	-51.0329	5.72685	0	-0.248262	0	0	-22.9563		0.322156	-7025.59	-8370.44	4142.38	-131.093	-547.484	-27.2114	-11.9005	-1396.74		-683.103	-68.1885	-51.0329	5.72685	0	-0.248262	0	0	-22.9563
728	Complex_1	0.0719972	1.56211	0.000984167	0	-1.34606e-05	0	0	-1.4898		-0.00128013	0.0753586	-0.00171458	0.000984167	0	-1.34606e-05	0	0	0.0771127		-0.00101016	-68.2722	-51.032	5.72552	0	-0.248247	0	0	-23.0417		0.324256	-7042.9	-8348.67	4080.24	-124.572	-547.108	-24.7914	-13.0352	-1388.7		-676.255	-68.2722	-51.032	5.72552	0	-0.248247	0	0	-23.0417
729	Complex_1	-21.8237	7.59638	2.0594	-2.61408	-4.17591	-0.0338951	0	-0.69906		-23.9565	2.48131	-1.07394	2.0594	0	-0.00665851	0	0	0.392249		1.11026	-66.8611	-51.3375	7.00607	0	-0.248235	0	0	-22.3765		0.0949647	-7066.22	-8378.31	4021.1	-128.698	-549.65	-25.0851	-10.3019	-1404.42		-590.86	-66.8611	-51.3375	7.00607	0	-0.248235	0	0	-22.3765
730	Complex_1	-24.9723	2.4084	1.21559	-2.79777	-4.28387	-0.18375	0	1.13124		-22.4622	2.1198	0.419941	1.21559	0	-0.00741952	0	0	-1.17445		1.66614	-66.9211	-51.6752	7.01637	0	-0.248244	0	0	-22.1069		0.092922	-7057.33	-8346.91	4105.61	-128.675	-555.462	-26.7038	-15.3964	-1414.12		-675.678	-66.9211	-51.6752	7.01637	0	-0.248244	0	0	-22.1069
731	Complex_1	-22.4008	3.79467	1.8107	-2.22119	-4.24385	-0.275732	0	2.22081		-23.4862	3.03425	-0.0923954	1.8107	0	-0.00974227	0	0	-0.248353		1.57404	-68.3824	-51.0286	5.72686	0	-0.248226	0	0	-23.1527		0.320291	-7071.81	-8374.98	4083.71	-126.063	-559.576	-26.8646	-8.75841	-1365.5		-693.777	-68.3824	-51.0286	5.72686	0	-0.248226	0	0	-23.1527
732	Complex_1	-26.9254	-0.38584	0.202914	-3.29508	-3.99728	-0.117933	0	1.72764		-21.0598	1.51197	1.13646	0.202914	0	-0.00588182	0	0	-0.840819		1.0193	-68.2882	-51.0302	5.72666	0	-0.248243	0	0	-23.0583		0.321824	-7104.25	-8380.49	4018.36	-126.721	-550.876	-21.549	-16.265	-1394.83		-631.879	-68.2882	-51.0302	5.72666	0	-0.248243	0	0	-23.0583
733	Complex_1	-21.997	2.38863	2.40673	-2.42351	-4.37001	-0.284917	0	-0.0383842		-19.6755	3.70321	-0.718384	2.40673	0	-0.00662954	0	0	-0.0459406		2.06744	-68.2708	-51.0315	5.72943	0	-0.248239	0	0	-23.0392		0.318711	-7046.23	-8386.13	4081.96	-129.088	-555.403	-27.5306	-8.43305	-1396.14		-625.466	-68.2708	-51.0315	5.72943	0	-0.248239	0	0	-23.0392
734	Complex_1	-24.1992	10.0199	2.6504	-2.54472	-4.642	-0.452626	0	-1.17084		-28.0594	4.18684	1.89685	2.6504	0	-0.00448662	0	0	-1.74112		1.38519	-68.2776	-51.0315	5.72823	0	-0.248249	0	0	-23.0468		0.320697	-7024.73	-8315.55	4043.39	-127.904	-557.587	-21.3551	-10.6524	-1407.09		-627.979	-68.2776	-51.0315	5.72823	0	-0.248249	0	0	-23.0468
735	Complex_1	-0.073636	1.12709	-0.00117597	0	6.66068e-07	0	0	-1.19578		-0.00377096	-0.0451505	0.00671185	-0.00117597	0	6.66068e-07	0	0	-0.0471071		-0.00357998	-68.368	-51.0283	5.72806	0	-0.248184	0	0	-23.1397		0.320116	-7042.81	-8285.3	4068.01	-120.371	-542.765	-18.8316	-15.4796	-1431.65		-696.418	-68.368	-51.0283	5.72806	0	-0.248184	0	0	-23.1397
736	Complex_1	-0.0903407	1.03734	-0.00165321	0	5.30163e-05	0	0	-1.1212		-0.00487547	-0.0587926	0.0128022	-0.00165321	0	5.30163e-05	0	0	-0.0652842		-0.00471039	-68.25	-51.0433	5.72887	0	-0.248267	0	0	-23.0126		0.325322	-7058.14	-8361.53	4055.23	-127.624	-544.835	-19.3482	-9.59992	-1420.81		-629.629	-68.25	-51.0433	5.72887	0	-0.248267	0	0	-23.0126
737	Complex_1	-24.9451	0.524063	1.09453	-3.88866	-4.89953	-0.152738	0	4.23888		-21.8616	2.34177	0.454141	1.09453	0	-0.00811853	0	0	-0.225341		1.02655	-68.3804	-51.0285	5.72952	0	-0.248215	0	0	-23.1512		0.317953	-7024.93	-8354.61	4066.34	-126.385	-558.07	-26.3792	-15.2282	-1401.88		-608.729	-68.3804	-51.0285	5.72952	0	-0.248215	0	0	-23.1512
738	Complex_1	0.0451871	1.57551	-0.000299328	0	4.9989e-06	0	0	-1.52993		-9.97488e-05	0.0538857	0.0004934	-0.000299328	0	4.9989e-06	0	0	0.0534758		0.000210879	-68.284	-51.03	5.72832	0	-0.24822	0	0	-23.053		0.318966	-6831.55	-8388.2	4240.88	-120.923	-548.456	-26.2758	-10.8323	-1391.07		-586.667	-68.284	-51.03	5.72832	0	-0.24822	0	0	-23.053
739	Complex_1	-0.0315255	1.66334	0.000573496	0	7.15228e-06	0	0	-1.69513		-0.000314587	-0.0220728	-0.00191631	0.000573496	0	7.15228e-06	0	0	-0.0208462		0.000109073	-68.2596	-51.0319	5.72751	0	-0.24819	0	0	-23.0275		0.320579	-7000.57	-8376.23	4070.54	-128.249	-551.989	-23.3595	-8.95441	-1396.74		-585.579	-68.2596	-51.0319	5.72751	0	-0.24819	0	0	-23.0275
740	Complex_1	-30.1866	1.05698	2.14401	-3.37782	-4.60528	-0.321538	0	5.49487		-30.5778	2.89964	2.47872	2.14401	0	-0.00614315	0	0	-2.21663		0.499676	-68.3436	-51.0328	5.72901	0	-0.248214	0	0	-23.1117		0.320087	-7115.65	-8385.76	4010.08	-128.321	-554.857	-26.4765	-6.1567	-1370.37		-653.788	-68.3436	-51.0328	5.72901	0	-0.248214	0	0	-23.1117
741	Complex_1	-25.3329	-3.67316	1.13862	-2.95656	-3.43618	-1.22125	0	5.25548		-20.4398	1.54712	-0.757408	1.13862	0	-0.00818347	0	0	-0.00605433		1.18015	-68.238	-51.0385	5.72952	0	-0.248217	0	0	-23.004		0.323209	-7045.13	-8382.99	4088.35	-129.192	-554.251	-21.9327	-7.59979	-1362.81		-674.704	-68.238	-51.0385	5.72952	0	-0.248217	0	0	-23.004
742	Complex_1	-28.1348	-1.75644	0.282293	-3.68602	-4.98738	-0.0584739	0	6.33902		-24.2678	1.22515	0.385557	0.282293	0	-0.00177685	0	0	-0.298656		0.857733	-68.3276	-51.028	5.72895	0	-0.248191	0	0	-23.0984		0.317982	-6990.19	-8374.09	4113.19	-129.713	-558.394	-21.8279	-7.42859	-1413.45		-598.473	-68.3276	-51.028	5.72895	0	-0.248191	0	0	-23.0984
743	Complex_1	-24.6005	-0.947863	1.19352	-3.47407	-4.29591	-0.0578022	0	5.2604		-22.2788	2.31328	0.936271	1.19352	0	-0.00626412	0	0	-1.07781		1.26756	-68.255	-51.0275	5.72953	0	-0.248191	0	0	-23.0257		0.316822	-7021.16	-8417.02	4139.75	-131.23	-564.925	-19.7621	-8.55059	-1373.86		-645.56	-68.255	-51.0275	5.72953	0	-0.248191	0	0	-23.0257
744	Complex_1	-31.6075	-1.94742	1.27847	-3.75734	-4.76261	-0.0496697	0	6.02263		-28.3916	2.20898	2.25579	1.27847	0	-0.00503314	0	0	-1.78922		0.468975	-68.4638	-51.0326	5.73186	0	-0.248176	0	0	-23.2342		0.319388	-6996.67	-8309.71	4095.63	-127.088	-556.687	-20.63	-12.5471	-1398.12		-667.525	-68.4638	-51.0326	5.73186	0	-0.248176	0	0	-23.2342
745	Complex_1	-26.6047	-1.77657	2.79146	-4.1303	-4.16601	-0.0198649	0	5.97064		-25.2741	4.26689	1.89046	2.79146	0	-0.00942312	0	0	-2.05912		1.65352	-68.2642	-51.0319	5.72836	0	-0.248248	0	0	-23.0332		0.320821	-7014.03	-8382.69	4082.77	-128.562	-556.47	-24.5818	-12.0211	-1374.91		-617.563	-68.2642	-51.0319	5.72836	0	-0.248248	0	0	-23.0332
746	Complex_1	-26.6569	-5.20514	0.450951	-3.58406	-4.27957	-0.283238	0	7.98086		-21.7367	1.73671	0.488312	0.450951	0	-0.00823926	0	0	-0.415952		1.22163	-68.2937	-51.0356	5.73212	0	-0.248215	0	0	-23.0612		0.319184	-7074.6	-8371.91	4050.4	-128.191	-557.863	-21.8402	-9.03884	-1384.96		-651.188	-68.2937	-51.0356	5.73212	0	-0.248215	0	0	-23.0612
747	Complex_1	-25.2401	-1.12153	1.89529	-3.45454	-4.40256	-1.85183	0	6.50972		-22.8146	2.56516	-0.441252	1.89529	0	-0.00477095	0	0	0.122101		0.993793	-68.3742	-51.0305	5.72686	0	-0.248213	0	0	-23.1436		0.321217	-7116.26	-8329.46	4009.69	-126.7	-555.257	-20.5832	-15.2778	-1395.45		-683.215	-68.3742	-51.0305	5.72686	0	-0.248213	0	0	-23.1436
748	Complex_1	-24.9022	-5.33105	1.70433	-4.07998	-3.96506	-0.160895	0	9.07522		-22.1448	3.19722	1.99745	1.70433	0	-0.00736585	0	0	-1.90612		1.40893	-68.2606	-51.0291	5.72802	0	-0.248202	0	0	-23.0301		0.318843	-7015.64	-8325.42	4028.14	-126.416	-556.068	-24.4783	-12.8363	-1402.46		-596.101	-68.2606	-51.0291	5.72802	0	-0.248202	0	0	-23.0301
749	Complex_1	-0.0816488	1.62048	-0.00245487	0	-6.04017e-05	0	0	-1.69835		-0.0012647	-0.0837497	0.00348244	-0.00245487	0	-6.04017e-05	0	0	-0.083736		-0.000980918	-68.2157	-51.0286	5.72676	0	-0.248209	0	0	-22.986		0.320358	-7072.1	-8333.43	3997.9	-124.441	-549.251	-23.5213	-20.7711	-1402.95		-615.628	-68.2157	-51.0286	5.72676	0	-0.248209	0	0	-22.986
750	Complex_1	-0.00815027	1.31805	-7.57845e-06	0	-7.78165e-08	0	0	-1.32594		-0.000254386	-0.00580726	7.29571e-05	-7.57845e-06	0	-7.78164e-08	0	0	-0.00587869		6.13073e-06	-68.1456	-50.1776	5.75546	0	-0.248214	0	0	-23.7504		0.275131	-6956.55	-8356.81	4153.36	-124.008	-547.236	-25.5654	-12.0433	-1375.42		-668.822	-68.1456	-50.1776	5.75546	0	-0.248214	0	0	-23.7504
751	Complex_1	-29.7241	4.25347	1.60219	-3.08136	-4.80662	-0.803198	0	4.26519		-31.1538	2.18454	2.5832	1.60219	0	0.00234237	0	0	-2.22988		0.226695	-68.3023	-51.0218	5.72357	0	-0.248227	0	0	-23.0741		0.318244	-7062.78	-8301.86	4054.16	-124.811	-559.86	-25.6124	-15.0236	-1409.29		-680.477	-68.3023	-51.0218	5.72357	0	-0.248227	0	0	-23.0741
752	Complex_1	-31.7882	-1.37651	1.04335	-3.94991	-4.33723	-0.0252611	0	6.21948		-29.3621	1.63985	2.69712	1.04335	0	-0.0049374	0	0	-2.26207		0.166393	-68.2331	-51.0238	5.72386	0	-0.248232	0	0	-23.0046		0.319657	-7010.17	-8297.6	4060.24	-124.324	-552.203	-24.8108	-22.3615	-1418.87		-630.247	-68.2331	-51.0238	5.72386	0	-0.248232	0	0	-23.0046
753	Complex_1	-28.553	4.55339	3.57083	-3.5301	-4.62898	-0.594034	0	2.61014		-30.5343	4.44773	2.03394	3.57083	0	-0.00822941	0	0	-2.18105		1.03224	-68.255	-51.0296	5.72654	0	-0.248211	0	0	-23.024		0.320265	-7069.01	-8309.07	4038.51	-123.662	-550.638	-24.2485	-19.9825	-1415.44		-664.478	-68.255	-51.0296	5.72654	0	-0.248211	0	0	-23.024
754	Complex_1	-28.4344	2.18374	2.31927	-3.20763	-4.76107	-0.150373	0	5.15494		-29.9733	3.24658	2.16666	2.31927	0	-0.0070505	0	0	-2.11306		0.880764	-68.2722	-51.0334	5.72841	0	-0.248237	0	0	-23.04		0.32104	-7014.38	-8353.93	4137.39	-131.427	-563.077	-23.1871	-13.7346	-1404.9		-661.511	-68.2722	-51.0334	5.72841	0	-0.248237	0	0	-23.04
755	Complex_1	-24.8842	1.85262	1.28294	-2.95405	-4.25619	-0.681721	0	3.98693		-24.1147	1.76007	0.250979	1.28294	0	0.00276832	0	0	-0.540331		0.763716	-68.2433	-51.0322	5.72829	0	-0.248198	0	0	-23.0106		0.319379	-7046.74	-8313.67	4061.29	-126.672	-557.717	-23.3547	-11.7768	-1410.44		-664.392	-68.2433	-51.0322	5.72829	0	-0.248198	0	0	-23.0106
756	Complex_1	-29.7293	-0.263774	0.452093	-3.29151	-5.09636	-0.188124	0	5.67322		-27.0149	1.28053	0.20657	0.452093	0	-0.00432172	0	0	0.0812412		0.544951	-68.2041	-51.0363	5.7308	0	-0.248213	0	0	-22.9709		0.320559	-7032.79	-8302.03	4019.07	-121.306	-546.797	-22.2228	-8.35665	-1382.29		-668.86	-68.2041	-51.0363	5.7308	0	-0.248213	0	0	-22.9709
757	Complex_1	-27.3906	1.73095	3.74782	-3.76328	-4.83127	-0.443103	0	6.89693		-30.7286	4.94949	2.33244	3.74782	0	-0.00273362	0	0	-2.35147		1.22343	-68.3176	-51.0355	5.72892	0	-0.24824	0	0	-23.0853		0.322641	-7001.19	-8337.65	4077.48	-127.514	-551.523	-21.2747	-18.6365	-1380.43		-641.648	-68.3176	-51.0355	5.72892	0	-0.24824	0	0	-23.0853
758	Complex_1	-24.8105	-2.03456	3.58607	-3.62104	-4.73326	-0.593089	0	8.50877		-25.9234	4.91092	2.08483	3.58607	0	-0.00954362	0	0	-2.20819		1.45775	-68.3401	-51.0365	5.72844	0	-0.248244	0	0	-23.1073		0.323511	-7065.29	-8320.17	4019.78	-126.721	-554.622	-26.8591	-14.2388	-1389.91		-652.555	-68.3401	-51.0365	5.72844	0	-0.248244	0	0	-23.1073
759	Complex_1	-29.3428	2.44257	2.26461	-3.47568	-4.24042	-0.76389	0	3.88501		-29.455	2.98603	2.0774	2.26461	0	-0.00117959	0	0	-2.12822		0.77342	-68.3321	-51.0289	5.72817	0	-0.248187	0	0	-23.1022		0.319081	-7139.33	-8330.08	3958.02	-128.705	-550.743	-21.7326	-8.34802	-1406.8		-650.948	-68.3321	-51.0289	5.72817	0	-0.248187	0	0	-23.1022
760	Complex_1	-27.044	-2.82744	0.652939	-3.58584	-4.33473	-0.0810751	0	8.22981		-25.0976	1.1661	1.04314	0.652939	0	-0.00308728	0	0	-1.00874		0.481849	-68.313	-51.0338	5.72897	0	-0.248206	0	0	-23.08		0.320107	-6983.77	-8306.82	4061.34	-125.477	-557.967	-20.9013	-21.2844	-1416.04		-596.63	-68.313	-51.0338	5.72897	0	-0.248206	0	0	-23.08
761	Complex_1	-0.0923843	1.90612	0.000538964	-2.84217e-14	4.38102e-06	0	0	-2.00278		0.00373134	-0.0886515	-0.00777131	0.000538964	0	4.38102e-06	0	0	-0.0856633		0.00423971	-68.2516	-51.0326	5.72826	0	-0.248253	0	0	-23.02		0.32107	-7000.19	-8350.66	4077.71	-126.169	-547.703	-25.3936	-17.2276	-1406.06		-604.685	-68.2516	-51.0326	5.72826	0	-0.248253	0	0	-23.02
762	Complex_1	-0.00637898	1.74184	-0.00184389	0	-1.0839e-05	0	0	-1.74522		-0.00114888	0.0022576	0.00238403	-0.00184389	0	-1.0839e-05	0	0	0.00247026		-0.000741962	-68.2777	-51.0361	5.73016	0	-0.24823	0	0	-23.0444		0.320839	-6924.89	-8357	4069.32	-125.689	-544.785	-22.8545	-11.1804	-1424.27		-508.432	-68.2777	-51.0361	5.73016	0	-0.24823	0	0	-23.0444
763	Complex_1	-0.005656	1.49639	0.000774312	0	2.6994e-06	0	0	-1.50223		-0.000589958	-0.00430078	-0.00137083	0.000774312	0	2.6994e-06	0	0	-0.00336845		-0.000338509	-68.2114	-51.0327	5.72659	0	-0.248218	0	0	-22.9796		0.32257	-6945.92	-8336.42	4102.5	-126.249	-540.237	-16.8025	-10.0215	-1405.18		-613.518	-68.2114	-51.0327	5.72659	0	-0.248218	0	0	-22.9796
764	Complex_1	-25.5807	-0.358689	1.70705	-3.61823	-4.60162	-0.123067	0	4.96359		-23.5497	2.95886	1.14159	1.70705	0	-0.0082371	0	0	-1.21137		1.32982	-68.3432	-51.0282	5.72773	0	-0.248197	0	0	-23.1138		0.319312	-7033.62	-8279.35	4050.96	-129.876	-554.833	-23.5766	-6.38095	-1447.15		-643.413	-68.3432	-51.0282	5.72773	0	-0.248197	0	0	-23.1138
765	Complex_1	-27.0027	1.27108	0.802483	-3.85262	-4.23786	-0.819177	0	2.37691		-22.5435	1.42622	-0.0726662	0.802483	0	-0.00501781	0	0	-0.041102		0.74252	-68.2433	-51.0317	5.72936	0	-0.24821	0	0	-23.0121		0.319335	-7095.56	-8360.27	3954.62	-132.135	-560.42	-25.9314	-8.4296	-1384.4		-578.596	-68.2433	-51.0317	5.72936	0	-0.24821	0	0	-23.0121
766	Complex_1	-26.3658	2.52457	1.54402	-3.8199	-4.01391	-0.0449677	0	2.75063		-25.3062	2.01142	0.638204	1.54402	0	-0.00462052	0	0	-0.833035		0.666851	-68.2534	-51.0325	5.72688	0	-0.248239	0	0	-23.0206		0.320974	-7101.96	-8389.39	4066.97	-131.925	-543.908	-23.7997	-9.6499	-1369.95		-700.299	-68.2534	-51.0325	5.72688	0	-0.248239	0	0	-23.0206
767	Complex_1	1.00044e-11	-1.81899e-12	0	0	-1.13687e-13	0	0	9.54969e-12		-6.82121e-13	0	0	0	0	0	0	0	0		0	-68.2806	-51.0341	5.72683	0	-0.248205	0	0	-23.0475		0.322287	-6956.12	-8326.53	4109.89	-125.619	-545.849	-24.8413	-11.6623	-1401.3		-630.213	-68.2806	-51.0341	5.72683	0	-0.248205	0	0	-23.0475
768	Complex_1	-29.084	2.08622	0.982259	-3.86025	-4.93142	-0.149779	0	3.10091		-26.312	1.74461	-0.136099	0.982259	0	-0.00494102	0	0	-0.112548		1.01594	-68.3758	-51.0261	5.72711	0	-0.248231	0	0	-23.1481		0.319502	-7056.18	-8378.07	4058.3	-129.488	-543.988	-25.2816	-11.3161	-1404.79		-621.544	-68.3758	-51.0261	5.72711	0	-0.248231	0	0	-23.1481
769	Complex_1	-28.2673	-0.944183	0.323976	-4.02769	-4.28876	-0.974273	0	4.64033		-22.9967	1.30412	1.1881	0.323976	0	-0.00331322	0	0	-0.570739		0.366104	-68.263	-51.0291	5.72703	0	-0.248189	0	0	-23.032		0.319333	-7095.15	-8338.64	4001.3	-131.216	-552.533	-25.9952	-11.3924	-1420.98		-615.693	-68.263	-51.0291	5.72703	0	-0.248189	0	0	-23.032
770	Complex_1	-25.7191	2.87126	1.13228	-3.70915	-4.1809	-0.0294091	0	2.20648		-24.0097	1.90843	1.05181	1.13228	0	-0.00478401	0	0	-1.0792		0.808322	-68.3219	-51.0317	5.72691	0	-0.248234	0	0	-23.0907		0.32181	-6996.35	-8414.64	4076.54	-133.9	-548.653	-25.0023	-14.929	-1369.5		-566.251	-68.3219	-51.0317	5.72691	0	-0.248234	0	0	-23.0907
771	Complex_1	-24.1142	5.2955	0.792375	-3.33822	-4.46147	-0.186644	0	2.4902		-24.7059	2.01171	0.567303	0.792375	0	-0.00677693	0	0	-0.29401		0.952816	-68.3474	-51.0276	5.72567	0	-0.24822	0	0	-23.118		0.320765	-7050.84	-8330.14	4081.62	-129.711	-556.959	-23.8473	-15.9609	-1383.59		-692.265	-68.3474	-51.0276	5.72567	0	-0.24822	0	0	-23.118
772	Complex_1	-26.0656	0.870447	1.04764	-3.92546	-4.8232	-0.100249	0	3.99156		-23.1264	1.54077	0.0321609	1.04764	0	0.00234105	0	0	-0.182929		0.641558	-68.1368	-51.0392	5.73176	0	-0.248209	0	0	-22.9002		0.319019	-7080.58	-8362.85	4046.41	-126.437	-556.278	-25.7885	-11.7243	-1370.68		-673.231	-68.1368	-51.0392	5.73176	0	-0.248209	0	0	-22.9002
773	Complex_1	-23.5029	0.540777	1.09422	-3.89787	-4.45389	-0.184344	0	3.03817		-19.6399	3.40324	0.851334	1.09422	0	-0.0115943	0	0	-0.293031		1.7623	-68.2156	-51.037	5.7275	0	-0.248208	0	0	-22.9811		0.323206	-6964.24	-8383.59	4074.18	-128.712	-549.078	-19.3462	-13.1057	-1364.73		-579.854	-68.2156	-51.037	5.7275	0	-0.248208	0	0	-22.9811
774	Complex_1	-29.1596	-2.97335	0.274989	-3.72713	-4.25322	-0.0491226	0	3.48165		-21.9134	0.792035	0.579578	0.274989	0	-0.002612	0	0	-0.317299		0.257378	-68.3612	-51.0296	5.73116	0	-0.248218	0	0	-23.1313		0.316769	-7036.92	-8410.45	4059.62	-134.097	-556.301	-24.659	-9.23281	-1362.53		-599.274	-68.3612	-51.0296	5.73116	0	-0.248218	0	0	-23.1313
775	Complex_1	-29.0087	4.24896	2.18591	-3.63074	-4.3446	-0.474753	0	0.755428		-27.7489	2.64118	2.04794	2.18591	0	-0.00218018	0	0	-2.09418		0.503683	-68.2921	-51.027	5.73056	0	-0.248129	0	0	-23.0605		0.313037	-7078.77	-8370.62	4013.3	-129.689	-551.311	-25.8421	-15.9984	-1371.37		-627.248	-68.2921	-51.027	5.73056	0	-0.248129	0	0	-23.0605
776	Complex_1	-26.9764	2.1265	3.19159	-4.13466	-4.51081	-0.651799	0	3.35363		-26.3509	5.04534	1.92562	3.19159	0	-0.00366175	0	0	-1.80852		1.74031	-68.3026	-51.0339	5.73009	0	-0.248227	0	0	-23.0707		0.320179	-7038.29	-8325.48	4063.71	-129.349	-548.889	-26.114	-15.8571	-1402.99		-653.32	-68.3026	-51.0339	5.73009	0	-0.248227	0	0	-23.0707
777	Complex_1	-25.7647	-1.67994	1.10317	-3.63808	-4.61448	-0.0985986	0	4.59382		-21.4306	1.81513	-0.345193	1.10317	0	-0.00402266	0	0	-0.0976084		1.15878	-68.2535	-51.0351	5.72837	0	-0.248201	0	0	-23.02		0.321437	-6986.03	-8333.88	4067.92	-128.407	-550.818	-28.3373	-11.7743	-1414.95		-585.788	-68.2535	-51.0351	5.72837	0	-0.248201	0	0	-23.02
778	Complex_1	0.038117	0.317023	-0.00263069	2.84217e-14	2.45387e-05	0	0	-0.275193		-0.00110717	0.0545512	0.00658557	-0.00263069	0	2.45387e-05	0	0	0.0515749		-0.0010031	-68.2584	-51.0338	5.72936	0	-0.248226	0	0	-23.0262		0.320469	-6994.14	-8385.64	4095.87	-125.134	-549.813	-25.7224	-8.67971	-1372.96		-622.052	-68.2584	-51.0338	5.72936	0	-0.248226	0	0	-23.0262
779	Complex_1	-8.18545e-12	-1.81899e-12	0	0	0	0	0	-7.50333e-12		2.27374e-13	0	0	0	0	0	0	0	0		0	-68.2939	-51.0291	5.72772	0	-0.248213	0	0	-23.0634		0.319076	-7044.61	-8322.69	4027.82	-127.296	-542.465	-23.5333	-13.1882	-1422.93		-620.328	-68.2939	-51.0291	5.72772	0	-0.248213	0	0	-23.0634
780	Complex_1	-31.1713	-2.25169	1.78358	-3.41526	-4.55265	-0.0159989	0	6.12967		-28.849	2.78209	2.11019	1.78358	0	-0.0082393	0	0	-1.85913		0.755684	-68.3128	-51.0265	5.72587	0	-0.248251	0	0	-23.0846		0.320746	-6973.79	-8298.05	4089.61	-124.504	-549.391	-23.4752	-16.3031	-1446.67		-605.013	-68.3128	-51.0265	5.72587	0	-0.248251	0	0	-23.0846
781	Complex_1	-25.284	0.186444	6.19865	-3.7485	-4.52676	-0.952126	0	4.20656		-26.6482	7.46195	1.55374	6.19865	0	-0.00109452	0	0	-1.96983		1.68049	-68.199	-51.037	5.72892	0	-0.24825	0	0	-22.9648		0.322146	-7006.75	-8311	4105.69	-124.14	-544.086	-24.6011	-11.8973	-1430.09		-666.624	-68.199	-51.037	5.72892	0	-0.24825	0	0	-22.9648
782	Complex_1	-22.7347	7.3749	2.45616	-2.25605	-4.47003	-0.490916	0	-0.505976		-24.8428	2.69955	0.0382421	2.45616	0	0.016802	0	0	-0.119409		0.307755	-68.1884	-51.0313	5.72881	0	-0.248205	0	0	-22.9568		0.319045	-7109.19	-8280.78	4025.51	-123.69	-551.514	-24.1616	-12.0536	-1444.14		-698.362	-68.1884	-51.0313	5.72881	0	-0.248205	0	0	-22.9568
783	Complex_1	-22.6859	11.3899	1.11719	-1.48626	-4.36785	-0.501173	0	-0.596319		-28.2414	1.84906	1.58811	1.11719	0	0.00270677	0	0	-1.22283		0.363881	-68.2905	-51.0308	5.73067	0	-0.248166	0	0	-23.0591		0.316806	-7056.47	-8322.67	4003.93	-123.466	-558.169	-27.7111	-6.8798	-1416.73		-604.77	-68.2905	-51.0308	5.73067	0	-0.248166	0	0	-23.0591
784	Complex_1	-18.6083	6.74035	1.083	-2.83679	-3.3965	-0.121003	0	-0.32513		-19.7522	1.65884	-0.00988904	1.083	0	-0.00547511	0	0	-0.101576		0.692782	-68.3073	-51.0306	5.72925	0	-0.248229	0	0	-23.0769		0.319159	-7051.81	-8326.3	3981.87	-123.626	-544.785	-26.7658	-12.1542	-1402.03		-598.019	-68.3073	-51.0306	5.72925	0	-0.248229	0	0	-23.0769
785	Complex_1	-22.1427	9.33663	1.56579	-1.48483	-4.24227	-1.26182	0	1.64811		-27.7043	1.16433	-0.709224	1.56579	0	0.00310406	0	0	0.217017		0.0876421	-68.1597	-51.0326	5.72847	0	-0.248221	0	0	-22.9278		0.320418	-7169.55	-8324.19	3894.96	-122.803	-549.197	-27.06	-16.2049	-1431.49		-593.566	-68.1597	-51.0326	5.72847	0	-0.248221	0	0	-22.9278
786	Complex_1	-26.5833	9.76454	2.20335	-2.8092	-3.98984	-0.930924	0	-0.897283		-29.924	2.72726	1.65525	2.20335	0	-0.0025628	0	0	-2.00002		0.871248	-68.2678	-51.0263	5.72637	0	-0.248243	0	0	-23.0391		0.319485	-7141.43	-8352.06	4028.36	-126.351	-548.108	-26.2885	-9.36389	-1408.58		-699.033	-68.2678	-51.0263	5.72637	0	-0.248243	0	0	-23.0391
787	Complex_1	-25.8871	-3.41303	1.63027	-4.00145	-4.27413	-0.0872586	0	7.37887		-23.1203	3.19312	2.13837	1.63027	0	-0.00301952	0	0	-1.59506		1.02256	-68.247	-51.0326	5.72634	0	-0.248228	0	0	-23.0149		0.322357	-6958.82	-8312.38	4103.78	-123.807	-550.016	-22.9734	-10.319	-1405.39		-637.72	-68.247	-51.0326	5.72634	0	-0.248228	0	0	-23.0149
788	Complex_1	-26.9613	3.07846	0.799608	-3.15	-4.87467	-0.886454	0	8.57807		-30.5063	0.972833	0.319435	0.799608	0	-0.000268782	0	0	-0.301347		0.155407	-68.3821	-51.0244	5.72637	0	-0.248189	0	0	-23.1545		0.318605	-7019.93	-8332.29	4121.6	-124.993	-547.918	-26.4424	-9.60389	-1423.78		-676.51	-68.3821	-51.0244	5.72637	0	-0.248189	0	0	-23.1545
789	Complex_1	-22.5452	4.63902	2.10617	-2.518	-4.24484	-0.894939	0	6.70779		-28.3404	1.59794	-0.77361	2.10617	0	-0.00244798	0	0	0.131975		0.135854	-68.1428	-51.0323	5.7284	0	-0.248259	0	0	-22.9117		0.321009	-7034.19	-8341.54	4049.35	-128.064	-554.345	-26.8542	-11.1625	-1379.57		-641.996	-68.1428	-51.0323	5.7284	0	-0.248259	0	0	-22.9117
790	Complex_1	-29.0259	0.855894	2.30014	-3.67039	-4.44241	-1.01321	0	6.87331		-29.9292	3.31563	2.18609	2.30014	0	0.00419904	0	0	-1.81264		0.637841	-68.2252	-51.0278	5.73311	0	-0.248122	0	0	-22.9966		0.314228	-7125.69	-8364.96	4026.35	-132.946	-549.637	-25.5546	-11.0552	-1396.87		-671.011	-68.2252	-51.0278	5.73311	0	-0.248122	0	0	-22.9966
791	Complex_1	-21.3224	1.86993	0.911602	-3.5717	-3.93757	-0.0286345	0	4.15743		-20.7235	2.67024	0.518561	0.911602	0	-0.00910354	0	0	-0.566545		1.81573	-68.3046	-51.029	5.72783	0	-0.248224	0	0	-23.0745		0.319235	-7048.19	-8345.11	4033.24	-126.483	-553.124	-25.776	-6.89181	-1390.41		-633.633	-68.3046	-51.029	5.72783	0	-0.248224	0	0	-23.0745
792	Complex_1	0.0107253	0.364566	0.000675113	0	1.10815e-05	0	0	-0.353633		-0.000893731	0.0118814	5.80761e-05	0.000675113	0	1.10815e-05	0	0	0.0120022		-0.000865113	-68.2206	-51.0272	5.72649	0	-0.248202	0	0	-22.9912		0.319602	-7011.21	-8356.26	4060.94	-129.252	-550.072	-24.8871	-6.36587	-1402.4		-602.922	-68.2206	-51.0272	5.72649	0	-0.248202	0	0	-22.9912
793	Complex_1	3.18323e-11	3.63798e-12	0	0	0	0	0	2.68301e-11		-2.27374e-13	0	0	0	0	0	0	0	0		0	-68.2713	-51.0338	5.73031	0	-0.248195	0	0	-23.0375		0.317941	-7115.01	-8397.73	4007.56	-128.813	-557.672	-19.4749	-8.74533	-1390.29		-619.848	-68.2713	-51.0338	5.73031	0	-0.248195	0	0	-23.0375
794	Complex_1	0.00552057	0.609548	-0.000259123	0	4.43106e-07	0	0	-0.603802		3.36974e-05	0.00440402	0.000522357	-0.000259123	0	4.43106e-07	0	0	0.00405313		8.72129e-05	-68.2333	-51.0333	5.72924	0	-0.24822	0	0	-23.001		0.320036	-7054.04	-8351.73	3955.95	-125.739	-559.107	-24.0006	-11.2425	-1423.39		-514.783	-68.2333	-51.0333	5.72924	0	-0.24822	0	0	-23.001
795	Complex_1	0.0170631	0.638915	-0.000211428	0	1.01584e-06	0	0	-0.621649		7.62629e-06	0.0149971	0.000238807	-0.000211428	0	1.01584e-06	0	0	0.0148766		9.2077e-05	-68.2276	-51.0299	5.72857	0	-0.248201	0	0	-22.997		0.318974	-6941.02	-8279.83	4099.99	-120.429	-549.012	-25.0609	-10.723	-1426.58		-629.367	-68.2276	-51.0299	5.72857	0	-0.248201	0	0	-22.997
796	Complex_1	-25.4267	-3.14659	2.12692	-3.69634	-4.10754	-0.230048	0	6.6805		-23.0536	2.41988	0.4213	2.12692	0	0.00666142	0	0	-0.63126		0.496255	-68.3681	-51.0281	5.72692	0	-0.248199	0	0	-23.1387		0.319877	-7133.99	-8372.13	4033.21	-129.618	-554.943	-25.777	-12.5224	-1417.69		-654.515	-68.3681	-51.0281	5.72692	0	-0.248199	0	0	-23.1387
797	Complex_1	0.0380726	0.195387	-0.00127394	0	4.10288e-06	0	0	-0.156479		0.000433958	0.0455063	0.00204928	-0.00127394	0	4.10288e-06	0	0	0.0442316		0.000495302	-68.2696	-51.0314	5.72845	0	-0.248216	0	0	-23.0386		0.32017	-7120.34	-8297.31	4055.48	-122.441	-557.551	-27.3854	-14.3738	-1448.46		-708.295	-68.2696	-51.0314	5.72845	0	-0.248216	0	0	-23.0386
798	Complex_1	-29.0595	-0.804436	3.39177	-3.56769	-4.6555	-0.992301	0	7.27323		-29.7045	4.36189	2.24196	3.39177	0	0.00453112	0	0	-2.08501		0.808628	-68.2959	-51.0295	5.72872	0	-0.248198	0	0	-23.0652		0.318224	-7121.27	-8321.56	4067.57	-125.502	-559.085	-28.0315	-9.34193	-1426.74		-718.575	-68.2959	-51.0295	5.72872	0	-0.248198	0	0	-23.0652
799	Complex_1	-28.797	1.92966	1.70799	-3.343	-4.3727	-0.908457	0	5.44398		-29.2544	2.34975	2.35335	1.70799	0	0.00504387	0	0	-1.94511		0.228479	-68.2202	-51.032	5.72652	0	-0.248234	0	0	-22.9889		0.322369	-7096.9	-8434.6	4053.77	-130.602	-562.634	-22.0604	-9.30823	-1370.54		-620.928	-68.2202	-51.032	5.72652	0	-0.248234	0	0	-22.9889
800	Complex_1	-27.2377	1.18344	2.40512	-4.2167	-4.85386	-0.478103	0	5.56152		-26.8392	3.68213	2.27069	2.40512	0	0.00677636	0	0	-1.85689		0.85643	-68.2543	-51.0327	5.72833	0	-0.248211	0	0	-23.0221		0.320379	-7059.36	-8410.07	4047.86	-130.255	-552.699	-25.1856	-10.0644	-1371.25		-607.703	-68.2543	-51.0327	5.72833	0	-0.248211	0	0	-23.0221
801	Complex_1	-29.5546	-0.943862	1.01905	-3.92286	-4.20076	-0.0275507	0	3.7091		-25.1877	1.33174	1.67323	1.01905	0	-0.00425181	0	0	-1.65735		0.301062	-68.2647	-51.0329	5.72795	0	-0.248222	0	0	-23.0325		0.320954	-7024.31	-8388.2	4081.34	-127.714	-562.964	-22.9321	-6.51465	-1385.49		-611.843	-68.2647	-51.0329	5.72795	0	-0.248222	0	0	-23.0325
802	Complex_1	-21.339	-3.11134	1.19292	-3.87055	-3.97318	-0.0486265	0	6.47418		-18.0024	1.95866	0.265138	1.19292	0	-0.000461879	0	0	-0.120172		0.621238	-68.3651	-51.0273	5.72775	0	-0.248194	0	0	-23.1357		0.318312	-7048.91	-8417.52	4041.55	-134.075	-559.686	-24.2402	-6.72039	-1373.18		-575.042	-68.3651	-51.0273	5.72775	0	-0.248194	0	0	-23.1357
803	Complex_1	-21.0801	1.73981	1.28513	-3.05781	-3.60161	-0.425328	0	3.86262		-20.8829	1.65807	-0.69734	1.28513	0	-0.00612246	0	0	0.133396		0.942999	-68.3612	-51.0359	5.73041	0	-0.248221	0	0	-23.1266		0.319097	-7086.39	-8378.06	4031.16	-127.229	-557.823	-28.1716	-8.19349	-1413.29		-604.782	-68.3612	-51.0359	5.73041	0	-0.248221	0	0	-23.1266
804	Complex_1	-27.7032	2.03199	1.78809	-3.58837	-4.40302	-0.520573	0	5.62504		-28.6364	3.03275	1.98082	1.78809	0	-0.00181118	0	0	-1.81249		1.07815	-68.2316	-51.0291	5.73384	0	-0.248131	0	0	-23.0031		0.314876	-7121.78	-8380.96	4060.75	-128.908	-561.472	-26.2005	-6.60861	-1408.04		-670.346	-68.2316	-51.0291	5.73384	0	-0.248131	0	0	-23.0031
805	Complex_1	-0.00822656	0.188137	-0.000111159	0	6.38707e-07	0	0	-0.196215		-3.79551e-05	0.000165261	0.000340154	-0.000111159	0	6.38707e-07	0	0	-8.77595e-05		2.3386e-05	-68.2313	-51.0274	5.72953	0	-0.248192	0	0	-23.0019		0.316586	-6946.02	-8330.08	4098.26	-129.941	-544.917	-25.6856	-7.33991	-1439.92		-566.395	-68.2313	-51.0274	5.72953	0	-0.248192	0	0	-23.0019
806	Complex_1	-26.2286	2.9967	1.27749	-2.2231	-4.92818	-1.14199	0	8.1095		-30.319	1.46068	0.969341	1.27749	0	0.015084	0	0	-0.761853		-0.0393851	-68.2637	-51.0334	5.72879	0	-0.24819	0	0	-23.0309		0.31993	-7030.28	-8345.71	4066.66	-133.459	-558.031	-23.6836	-6.49776	-1425.44		-604.12	-68.2637	-51.0334	5.72879	0	-0.24819	0	0	-23.0309
807	Complex_1	-25.5662	2.19363	1.4332	-2.36718	-4.23973	-1.2448	0	7.00008		-28.3414	1.51826	1.06001	1.4332	0	0.0070488	0	0	-0.88271		-0.0992926	-68.3103	-51.0259	5.72694	0	-0.248186	0	0	-23.0816		0.318509	-7009.45	-8378.98	4020	-134.976	-554.536	-27.0122	-7.3027	-1376.79		-549.856	-68.3103	-51.0259	5.72694	0	-0.248186	0	0	-23.0816
808	Complex_1	-29.4385	0.941721	2.1217	-2.69723	-4.98953	-1.42208	0	5.11409		-28.5072	3.12386	2.3133	2.1217	0	0.00644519	0	0	-1.94006		0.622481	-68.2627	-51.0291	5.72927	0	-0.248232	0	0	-23.0328		0.318188	-7128.39	-8376.2	3958.67	-133.551	-557.045	-25.6468	-8.77207	-1387.77		-598.083	-68.2627	-51.0291	5.72927	0	-0.248232	0	0	-23.0328
809	Complex_1	-33.0079	4.9893	1.8386	-3.28009	-4.96388	-1.19786	0	1.4119		-31.8058	2.86854	2.61785	1.8386	0	0.0100514	0	0	-1.90708		0.30913	-68.3725	-51.0357	5.73121	0	-0.248232	0	0	-23.1391		0.319288	-7009.29	-8340.79	4006.95	-130.139	-568.892	-25.2721	-7.31967	-1400.34		-543.484	-68.3725	-51.0357	5.73121	0	-0.248232	0	0	-23.1391
810	Complex_1	-0.000154021	0.210254	-7.78097e-05	0	5.54388e-06	0	0	-0.210112		-0.000224698	0.00737349	0.000539162	-7.78097e-05	0	5.54388e-06	0	0	0.0070882		-0.000181607	-68.3005	-51.0238	5.72888	0	-0.2482	0	0	-23.0736		0.316224	-7018.87	-8372.44	4036.32	-128.816	-554.346	-26.7746	-6.79589	-1394.47		-571.539	-68.3005	-51.0238	5.72888	0	-0.2482	0	0	-23.0736
811	Complex_1	-0.0117908	0.23256	0.000646983	0	1.45623e-05	0	0	-0.244677		-0.000334544	-0.00571601	-0.00100824	0.000646983	0	1.45623e-05	0	0	-0.00507159		-0.000297721	-68.4127	-51.0242	5.72488	0	-0.248234	0	0	-23.1841		0.318949	-6996.17	-8336.75	4088.9	-128.818	-558.986	-25.9328	-8.62662	-1407.1		-618.851	-68.4127	-51.0242	5.72488	0	-0.248234	0	0	-23.1841
812	Complex_1	-0.0115117	0.990362	0.00013056	0	-2.15698e-06	0	0	-1.0016		-0.000403241	-0.0115214	0.000334315	0.00013056	0	-2.15698e-06	0	0	-0.0116581		-0.000325989	-68.2355	-51.0339	5.72941	0	-0.248217	0	0	-23.0031		0.320241	-6986.5	-8346.2	4037.42	-126.007	-559.711	-24.6167	-10.5936	-1384.55		-572.239	-68.2355	-51.0339	5.72941	0	-0.248217	0	0	-23.0031
813	Complex_1	0.00740685	1.01821	7.65531e-05	0	9.05731e-06	0	0	-1.00984		-0.0010455	0.00724215	0.00133542	7.65531e-05	0	9.05731e-06	0	0	0.00675385		-0.000932735	-68.3014	-51.0272	5.72658	0	-0.248212	0	0	-23.0721		0.319529	-7033.15	-8339.28	4112.79	-126.607	-563.203	-28.8055	-13.8938	-1407.19		-666.96	-68.3014	-51.0272	5.72658	0	-0.248212	0	0	-23.0721
814	Complex_1	-30.3246	6.334	2.46652	-3.77986	-4.71643	-1.44898	0	1.10911		-30.289	3.53761	2.21981	2.46652	0	0.00741138	0	0	-1.71194		0.555811	-68.3264	-51.0258	5.72642	0	-0.248148	0	0	-23.0963		0.317329	-7140.01	-8312.72	3974.96	-127.59	-556.383	-29.2935	-13.9829	-1418.32		-656.68	-68.3264	-51.0258	5.72642	0	-0.248148	0	0	-23.0963
815	Complex_1	-29.7873	2.9723	2.39452	-3.17232	-4.99292	-0.624623	0	5.59484		-31.9591	3.08269	2.25018	2.39452	0	0.00139688	0	0	-2.00153		0.438124	-68.2465	-51.0306	5.73011	0	-0.248151	0	0	-23.0163		0.318463	-7016.79	-8306.44	4052.03	-132.148	-550.763	-27.6512	-11.4233	-1404.89		-635.522	-68.2465	-51.0306	5.73011	0	-0.248151	0	0	-23.0163
816	Complex_1	-20.9948	1.97871	2.84912	-3.4517	-4.49532	-0.914501	0	5.34937		-22.3105	4.18496	0.49212	2.84912	0	0.0112178	0	0	-0.684625		1.51713	-68.2962	-51.0261	5.7273	0	-0.248205	0	0	-23.0679		0.318739	-7114.11	-8370.64	3965.02	-130.04	-565.27	-28.0793	-6.23629	-1357.95		-620.907	-68.2962	-51.0261	5.7273	0	-0.248205	0	0	-23.0679
817	Complex_1	1.54614e-11	-1.81899e-12	1.81899e-12	1.42109e-14	0	0	0	1.3415e-11		1.13687e-13	0	0	0	0	0	0	0	0		0	-68.2926	-51.0272	5.7267	0	-0.248213	0	0	-23.0629		0.319039	-7049.45	-8290.53	4041.92	-121.542	-548.917	-28.0252	-8.11476	-1436.33		-657.915	-68.2926	-51.0272	5.7267	0	-0.248213	0	0	-23.0629
818	Complex_1	-27.8101	1.37478	3.09556	-3.01987	-4.80542	-1.40585	0	5.60811		-28.6574	3.08647	0.740375	3.09556	0	0.01142	0	0	-0.927592		0.166709	-68.3148	-51.031	5.72929	0	-0.248188	0	0	-23.0833		0.318503	-6995.9	-8312.85	4070.12	-129.531	-557.661	-29.071	-17.0943	-1420.03		-599.786	-68.3148	-51.031	5.72929	0	-0.248188	0	0	-23.0833
819	Complex_1	-32.5234	-3.71645	0.677952	-4.55417	-4.38786	-0.0404487	0	4.93382		-25.4363	1.11823	1.94838	0.677952	0	-0.000667413	0	0	-1.59602		0.0885853	-68.3828	-51.0254	5.72556	0	-0.248213	0	0	-23.1547		0.319915	-7103.96	-8344.02	4041.45	-133.776	-563.184	-25.0964	-15.8844	-1410.35		-653.105	-68.3828	-51.0254	5.72556	0	-0.248213	0	0	-23.1547
820	Complex_1	-25.5224	11.7419	2.12177	-2.40611	-4.22564	-0.812732	0	-2.25705		-29.6845	2.81102	2.35575	2.12177	0	0.00745846	0	0	-1.8859		0.211943	-68.3491	-51.0261	5.72656	0	-0.248211	0	0	-23.121		0.319616	-7013.36	-8336.07	4105.09	-127.287	-556.207	-28.57	-8.02979	-1410.34		-651.955	-68.3491	-51.0261	5.72656	0	-0.248211	0	0	-23.121
821	Complex_1	-21.0265	8.67538	1.45549	-2.78744	-4.20494	-0.308296	0	-0.431712		-23.425	1.9327	0.262805	1.45549	0	-0.0071484	0	0	-0.686573		0.908125	-68.2541	-51.0332	5.73125	0	-0.248183	0	0	-23.0235		0.319554	-7065.52	-8319.1	4044.88	-127.91	-559.932	-25.71	-16.3844	-1415.99		-645.373	-68.2541	-51.0332	5.73125	0	-0.248183	0	0	-23.0235
822	Complex_1	-29.5843	7.66311	2.13156	-3.04984	-5.12555	-1.02026	0	0.520094		-30.7034	2.70948	1.93214	2.13156	0	0.008163	0	0	-1.68442		0.322037	-68.2141	-51.03	5.72792	0	-0.24821	0	0	-22.9839		0.320041	-7010.54	-8331.13	4059.65	-128.85	-562.319	-25.178	-17.725	-1394.58		-610.411	-68.2141	-51.03	5.72792	0	-0.24821	0	0	-22.9839
823	Complex_1	-29.162	5.80935	1.87654	-3.49507	-4.70657	-0.0293509	0	0.564138		-29.181	1.98305	2.09131	1.87654	0	-0.00391204	0	0	-2.26435		0.283456	-68.23	-51.029	5.72708	0	-0.248222	0	0	-23.0006		0.320694	-7048.11	-8338.63	4051.13	-132.03	-566.162	-25.1079	-18.2922	-1380.44		-638.579	-68.23	-51.029	5.72708	0	-0.248222	0	0	-23.0006
824	Complex_1	-14.3628	5.80412	2.16928	-3.35619	-3.65401	-0.149224	0	-0.476052		-14.7007	2.01871	-1.05333	2.16928	0	-0.00613168	0	0	0.304882		0.604015	-68.2222	-51.0276	5.72771	0	-0.248177	0	0	-22.9932		0.319136	-7033.83	-8351.42	4103.2	-133.002	-563.499	-27.7102	-14.8552	-1412.02		-634.522	-68.2222	-51.0276	5.72771	0	-0.248177	0	0	-22.9932
825	Complex_1	-25.2954	3.18911	2.79578	-3.25572	-4.77369	-0.56386	0	5.11011		-27.7971	3.72905	1.62306	2.79578	0	-0.00196873	0	0	-1.65109		0.963262	-68.2262	-51.0225	5.72693	0	-0.248195	0	0	-23		0.317665	-7005.74	-8408.75	4064.84	-128.844	-557.25	-26.5486	-16.2861	-1354.92		-577.979	-68.2262	-51.0225	5.72693	0	-0.248195	0	0	-23
826	Complex_1	0.000526361	0.636868	-5.2728e-05	0	5.64158e-07	0	0	-0.636162		-0.000127573	0.000162173	0.000155529	-5.2728e-05	0	5.64158e-07	0	0	0.00011272		-5.39126e-05	-68.3983	-51.0231	5.73255	0	-0.248107	0	0	-23.1715		0.311889	-6934.01	-8324.32	4092.65	-128.42	-558.662	-26.0274	-19.1388	-1390.98		-579.104	-68.3983	-51.0231	5.73255	0	-0.248107	0	0	-23.1715
827	Complex_1	-34.275	-3.84648	0.784853	-4.17524	-4.61596	-0.530835	0	5.91344		-27.8047	1.36904	1.76804	0.784853	0	-0.00285512	0	0	-1.43218		0.251191	-68.417	-51.0327	5.73019	0	-0.248195	0	0	-23.1849		0.318601	-7023.83	-8315.07	4044.63	-129.08	-551.221	-26.6596	-18.5265	-1429.29		-598.619	-68.417	-51.0327	5.73019	0	-0.248195	0	0	-23.1849
828	Complex_1	-28.5883	0.283512	0.874181	-3.85594	-4.41358	-0.569363	0	4.8158		-25.7229	1.13965	1.37028	0.874181	0	0.00244564	0	0	-1.49897		0.391721	-68.1908	-51.0258	5.72549	0	-0.24818	0	0	-22.9624		0.32004	-6974.29	-8358.28	4042.89	-133.742	-552.365	-28.1421	-13.5632	-1378.01		-553.078	-68.1908	-51.0258	5.72549	0	-0.24818	0	0	-22.9624
829	Complex_1	-19.9824	1.55488	3.15676	-3.66092	-4.88686	-0.102971	0	2.16777		-18.211	2.94843	0.336575	3.15676	0	0.00970793	0	0	-0.282999		-0.271609	-68.3241	-51.0256	5.72807	0	-0.248202	0	0	-23.096		0.317669	-7027.51	-8388.23	4043.88	-133.431	-555.387	-23.2019	-17.8795	-1375.68		-577.577	-68.3241	-51.0256	5.72807	0	-0.248202	0	0	-23.096
830	Complex_1	-24.0397	1.48366	2.36421	-3.09252	-5.15112	-0.434792	0	5.48514		-24.6943	2.71521	-1.54024	2.36421	0	-0.00911488	0	0	0.762671		1.13769	-68.3156	-51.029	5.72686	0	-0.248213	0	0	-23.086		0.320723	-7008.47	-8360.21	4040.45	-131.144	-550.799	-26.9773	-13.6975	-1385.6		-580.497	-68.3156	-51.029	5.72686	0	-0.248213	0	0	-23.086
831	Complex_1	-23.4448	10.132	3.62859	-3.23463	-4.4903	-0.668032	0	2.39193		-31.2043	4.85909	2.62922	3.62859	0	0.0262586	0	0	-2.26366		0.838678	-68.1722	-51.03	5.7277	0	-0.248191	0	0	-22.9412		0.319512	-7009.84	-8331.29	4100.29	-132.737	-558.043	-28.3105	-16.8979	-1417.48		-625.381	-68.1722	-51.03	5.7277	0	-0.248191	0	0	-22.9412
832	Complex_1	-28.3051	2.87753	2.95407	-3.47639	-5.06581	-0.695448	0	4.64799		-29.547	3.97046	1.93292	2.95407	0	0.00636625	0	0	-1.62768		0.704793	-68.3587	-51.0259	5.73015	0	-0.248188	0	0	-23.1319		0.317185	-7052.97	-8380.82	4054.16	-131.915	-546.782	-26.3664	-16.0854	-1387.29		-617.87	-68.3587	-51.0259	5.73015	0	-0.248188	0	0	-23.1319
833	Complex_1	-27.0011	-2.26093	2.15008	-3.73416	-4.54575	-0.0296734	0	7.25322		-25.8339	3.73159	1.26388	2.15008	0	-0.00690352	0	0	-1.33184		1.65636	-68.2245	-51.0269	5.72698	0	-0.248216	0	0	-22.9954		0.318997	-7022.61	-8365.89	4087.06	-132.098	-553.372	-24.4044	-16.1232	-1376.17		-641.609	-68.2245	-51.0269	5.72698	0	-0.248216	0	0	-22.9954
834	Complex_1	-30.0818	5.10645	1.72751	-3.37891	-5.13819	-0.605396	0	2.79668		-30.5899	2.35206	2.02703	1.72751	0	0.0051892	0	0	-1.63192		0.22426	-68.3119	-51.032	5.72765	0	-0.248211	0	0	-23.0809		0.321509	-7046.54	-8389.35	4064.69	-133.636	-555.773	-26.714	-11.5925	-1351.42		-642.745	-68.3119	-51.032	5.72765	0	-0.248211	0	0	-23.0809
835	Complex_1	-27.8595	-3.00667	1.20486	-4.14155	-3.58175	-0.0294364	0	4.98331		-23.2883	2.19573	1.80941	1.20486	0	-0.00989633	0	0	-1.49577		0.687128	-68.4605	-51.026	5.72925	0	-0.248194	0	0	-23.231		0.315492	-6969.6	-8349.06	4078.62	-128.422	-555.776	-26.3099	-16.2741	-1392.33		-580.046	-68.4605	-51.026	5.72925	0	-0.248194	0	0	-23.231
836	Complex_1	-26.1828	1.26633	1.20991	-4.49506	-3.9475	-0.629886	0	2.5182		-22.1048	2.38713	1.29	1.20991	0	-0.00228334	0	0	-1.16608		1.05559	-68.4357	-51.0329	5.73074	0	-0.248191	0	0	-23.2047		0.319393	-7147.78	-8391.58	3991.92	-129.249	-554.485	-23.911	-17.3209	-1385.81		-637.34	-68.4357	-51.0329	5.73074	0	-0.248191	0	0	-23.2047
837	Complex_1	-24.9451	1.00275	3.81952	-2.7331	-4.59933	-0.171073	0	4.08694		-26.3508	4.63214	-0.302079	3.81952	0	-0.00628001	0	0	-0.394104		1.51508	-68.2624	-51.0292	5.72916	0	-0.248189	0	0	-23.0324		0.318149	-7074.46	-8379.56	4003.2	-129.315	-551.902	-21.7646	-11.9017	-1387.58		-595.632	-68.2624	-51.0292	5.72916	0	-0.248189	0	0	-23.0324
838	Complex_1	-30.2282	-2.47288	0.635184	-4.06948	-3.70339	-0.0276639	0	4.86941		-25.4593	1.83635	2.02709	0.635184	0	-0.0073331	0	0	-1.57676		0.758167	-68.3974	-51.0301	5.72799	0	-0.248221	0	0	-23.1676		0.320504	-7019.82	-8337.17	4076.38	-130.322	-546.555	-25.0208	-16.2021	-1436.69		-604.232	-68.3974	-51.0301	5.72799	0	-0.248221	0	0	-23.1676
839	Complex_1	-27.3947	-1.69965	1.36178	-3.47865	-4.56716	-0.517232	0	5.72931		-24.2231	2.0482	0.120714	1.36178	0	-0.00204759	0	0	-0.423808		0.991564	-68.4061	-51.0345	5.73067	0	-0.248261	0	0	-23.174		0.319985	-7072.47	-8313.73	4044.51	-125.225	-552.431	-24.8312	-14.4526	-1430.91		-655.393	-68.4061	-51.0345	5.73067	0	-0.248261	0	0	-23.174
840	Complex_1	-26.9635	1.99264	0.793693	-4.18819	-3.41753	-0.367087	0	1.79798		-23.575	1.90846	1.37097	0.793693	0	-0.00372988	0	0	-1.06479		0.812315	-68.3043	-51.0351	5.72998	0	-0.248167	0	0	-23.0723		0.321297	-7120.5	-8306.19	4007.7	-129.364	-550.228	-20.4061	-22.1969	-1435.63		-664.196	-68.3043	-51.0351	5.72998	0	-0.248167	0	0	-23.0723
841	Complex_1	-27.429	-2.56858	2.30854	-3.70462	-4.19445	-0.453871	0	7.40499		-26.221	2.90552	0.45932	2.30854	0	-0.00183878	0	0	-0.714102		0.8536	-68.3221	-51.0276	5.72785	0	-0.248225	0	0	-23.0923		0.318106	-7036.11	-8329.2	4022.15	-131.996	-557.322	-25.9258	-23.998	-1392.12		-597.697	-68.3221	-51.0276	5.72785	0	-0.248225	0	0	-23.0923
842	Complex_1	-26.0872	-5.65478	1.16478	-3.89401	-4.34386	-0.564411	0	9.05585		-21.8508	2.01794	1.19773	1.16478	0	0.000799697	0	0	-0.668392		0.323025	-68.3986	-51.026	5.72792	0	-0.248203	0	0	-23.1706		0.318213	-6984.75	-8332.55	4067.78	-125.835	-547.653	-22.0262	-23.5107	-1411.67		-589.281	-68.3986	-51.026	5.72792	0	-0.248203	0	0	-23.1706
843	Complex_1	-29.1757	4.3217	2.19821	-3.40811	-4.55704	-0.449263	0	2.25719		-29.5383	2.98699	1.92961	2.19821	0	0.000931376	0	0	-1.80426		0.662499	-68.2324	-51.0362	5.73264	0	-0.248198	0	0	-22.9992		0.318637	-7023.6	-8316.38	4057.77	-127.463	-547.757	-27.7403	-20.6715	-1398.85		-642.51	-68.2324	-51.0362	5.73264	0	-0.248198	0	0	-22.9992
844	Complex_1	-19.4398	-2.46897	2.47706	-3.41248	-4.52851	-0.068639	0	8.02868		-19.467	4.95664	1.40215	2.47706	0	-0.00980735	0	0	-1.4448		2.53204	-68.3606	-51.0275	5.72522	0	-0.248284	0	0	-23.1309		0.320955	-6988.61	-8294.42	4080.64	-125.519	-552.775	-24.7572	-24.0728	-1435.45		-612.256	-68.3606	-51.0275	5.72522	0	-0.248284	0	0	-23.1309
845	Complex_1	-25.5753	-3.89432	1.49257	-3.67785	-4.26821	-0.444888	0	6.95375		-21.7363	2.25311	0.0587888	1.49257	0	-0.00890207	0	0	-0.592033		1.30269	-68.361	-51.0251	5.72768	0	-0.248205	0	0	-23.1332		0.317761	-6979.59	-8314.77	4065.43	-126.8	-558.684	-28.4828	-19.8756	-1394.99		-601.422	-68.361	-51.0251	5.72768	0	-0.248205	0	0	-23.1332
846	Complex_1	-27.9237	3.75172	3.16363	-3.14947	-4.87893	-0.812146	0	3.52644		-29.525	4.65912	1.81063	3.16363	0	-0.00667855	0	0	-1.748		1.43953	-68.4228	-51.026	5.72727	0	-0.248234	0	0	-23.1953		0.319453	-7010.59	-8352.36	4085.46	-130.868	-561.83	-25.6314	-19.5209	-1367.02		-638.826	-68.4228	-51.026	5.72727	0	-0.248234	0	0	-23.1953
847	Complex_1	0.00266142	0.620399	-8.50583e-05	0	-3.5301e-06	0	0	-0.617977		0.000328255	0.000508051	-0.000544846	-8.50583e-05	0	-3.5301e-06	0	0	0.000761762		0.000379724	-68.4102	-51.019	5.72752	0	-0.248099	0	0	-23.183		0.312437	-7075.9	-8339.73	4062.38	-126.136	-548.781	-24.2342	-20.0792	-1403.06		-676.261	-68.4102	-51.019	5.72752	0	-0.248099	0	0	-23.183
848	Complex_1	-0.0316665	0.826632	-0.000362365	0	9.64167e-06	0	0	-0.857443		-0.000502786	-0.0321804	0.00145382	-0.000362365	0	9.64167e-06	0	0	-0.032897		-0.000384439	-68.2588	-51.0332	5.72901	0	-0.248203	0	0	-23.026		0.319582	-6976.15	-8347.56	4088.05	-126.575	-542.683	-29.4028	-23.4722	-1381.22		-613.29	-68.2588	-51.0332	5.72901	0	-0.248203	0	0	-23.026
849	Complex_1	-0.0101842	-0.000240787	0.000161617	0	6.61572e-07	0	0	-0.0100964		-9.28865e-06	-0.0101842	-0.000240787	0.000161617	0	6.61572e-07	0	0	-0.0100964		-9.28865e-06	-68.2996	-51.0372	5.72826	0	-0.248217	0	0	-23.0662		0.323786	-7015.57	-8327.77	4075.31	-123.271	-546.544	-25.9802	-13.4552	-1410.01		-643.859	-68.2996	-51.0372	5.72826	0	-0.248217	0	0	-23.0662
850	Complex_1	-25.036	4.31866	3.77059	-2.86827	-4.29751	-1.09703	0	4.99381		-29.8562	3.65673	-1.50337	3.77059	0	0.000978303	0	0	0.694419		0.694113	-68.4622	-51.0221	5.72625	0	-0.248192	0	0	-23.2364		0.318179	-6991.15	-8335.2	4117.65	-131.645	-554.746	-20.0741	-8.93563	-1389.23		-668.976	-68.4622	-51.0221	5.72625	0	-0.248192	0	0	-23.2364
851	Complex_1	-29.6329	2.33161	1.86485	-3.17736	-4.38294	-0.817366	0	4.60006		-30.0518	2.57757	2.17154	1.86485	0	0.000270401	0	0	-1.8357		0.376613	-68.3282	-51.0263	5.72703	0	-0.248179	0	0	-23.0995		0.318775	-6959.35	-8344.42	4104.02	-129.698	-545.464	-19.3157	-14.5729	-1403.72		-606.191	-68.3282	-51.0263	5.72703	0	-0.248179	0	0	-23.0995
852	Complex_1	-32.9635	0.481069	1.1897	-3.36055	-4.60682	-0.294939	0	5.52716		-31.8991	2.03065	2.42421	1.1897	0	-0.00517135	0	0	-1.96527		0.387193	-68.453	-51.0197	5.72676	0	-0.248154	0	0	-23.2286		0.316751	-6997.75	-8335.2	4107.9	-127.674	-547.397	-22.2907	-17.8274	-1401.34		-653.926	-68.453	-51.0197	5.72676	0	-0.248154	0	0	-23.2286
853	Complex_1	-30.9438	-1.44176	2.15846	-3.61835	-4.91175	-1.36521	0	7.63667		-29.4018	2.59952	2.06546	2.15846	0	0.00908285	0	0	-1.98013		0.346646	-68.2464	-51.0304	5.72908	0	-0.248171	0	0	-23.015		0.318069	-6950.26	-8339.97	4049.35	-131.853	-556.029	-20.4302	-15.4811	-1403.15		-532.698	-68.2464	-51.0304	5.72908	0	-0.248171	0	0	-23.015
854	Complex_1	-25.62	0.345937	2.53857	-2.83225	-5.08429	-0.575605	0	7.13457		-27.1469	3.17508	2.39508	2.53857	0	0.00155639	0	0	-1.95493		0.194801	-68.3613	-51.0252	5.72888	0	-0.24818	0	0	-23.1332		0.316449	-7019.28	-8327.55	4144.04	-124.583	-556.526	-23.0682	-17.1792	-1422.61		-691.798	-68.3613	-51.0252	5.72888	0	-0.24818	0	0	-23.1332
855	Complex_1	-30.1584	2.98672	1.91552	-3.32679	-4.79732	-0.171799	0	4.39564		-31.1603	2.79448	2.10377	1.91552	0	-0.00509759	0	0	-1.93782		0.718116	-68.2953	-51.0204	5.72926	0	-0.248165	0	0	-23.0695		0.313568	-7064.08	-8300.68	4018.86	-124.837	-553.607	-24.5769	-18.7669	-1433.52		-626.946	-68.2953	-51.0204	5.72926	0	-0.248165	0	0	-23.0695
856	Complex_1	-26.4463	3.05521	0.681598	-3.95672	-4.04745	-0.0354628	0	2.48542		-24.6289	2.33286	2.37526	0.681598	0	-0.00832906	0	0	-1.68359		0.967924	-68.4261	-51.0251	5.72748	0	-0.248185	0	0	-23.1981		0.317763	-7129.2	-8368.45	3973.34	-130.679	-558.4	-26.7002	-15.068	-1403.24		-600.014	-68.4261	-51.0251	5.72748	0	-0.248185	0	0	-23.1981
857	Complex_1	-20.7744	3.26394	3.0201	-3.18051	-4.60059	-1.2967	0	10.1552		-28.1358	3.00243	-1.37808	3.0201	0	0.00352157	0	0	0.814509		0.542379	-68.34	-51.0294	5.72821	0	-0.248213	0	0	-23.1095		0.318936	-6962.53	-8364.36	4126.66	-126.359	-553.023	-23.4619	-12.2508	-1383.57		-626.172	-68.34	-51.0294	5.72821	0	-0.248213	0	0	-23.1095
858	Complex_1	-31.1797	0.713434	1.18071	-2.95884	-4.84502	-0.764922	0	4.6486		-29.1536	1.99334	1.76444	1.18071	0	-0.00455134	0	0	-1.47921		0.531947	-68.3183	-51.0253	5.72695	0	-0.248205	0	0	-23.0896		0.317878	-7088.8	-8367.07	4004.13	-130.052	-553.758	-22.104	-17.7808	-1386.91		-615.248	-68.3183	-51.0253	5.72695	0	-0.248205	0	0	-23.0896
859	Complex_1	-20.2329	2.70767	1.36124	-4.04894	-3.72364	-0.00113686	0	3.43357		-19.9616	1.60501	-0.760966	1.36124	0	-0.00556395	0	0	0.242431		0.76787	-68.3369	-51.0246	5.7282	0	-0.248193	0	0	-23.1092		0.316874	-7010.54	-8386.69	4079.67	-131.013	-553.238	-28.8902	-11.8623	-1372.18		-606.338	-68.3369	-51.0246	5.7282	0	-0.248193	0	0	-23.1092
860	Complex_1	-24.9949	1.99249	2.57977	-4.08128	-4.07661	-0.0747362	0	1.46773		-22.8023	3.02629	-0.485865	2.57977	0	-0.00576245	0	0	-0.250603		1.18875	-68.0335	-50.1964	5.76283	0	-0.248224	0	0	-23.6285		0.276807	-7037.91	-8385.28	4013.13	-131.749	-553.395	-21.6113	-11.9456	-1393.03		-554.031	-68.0335	-50.1964	5.76283	0	-0.248224	0	0	-23.6285
861	Complex_1	-21.2968	-2.51707	1.78383	-3.39128	-4.80183	-0.293153	0	5.59384		-17.6712	4.1385	-0.393709	1.78383	0	-0.0102372	0	0	0.243248		2.51537	-68.3057	-51.0286	5.72764	0	-0.248217	0	0	-23.0768		0.320287	-7010.48	-8347.28	4081.01	-133.801	-563.439	-25.1039	-12.3283	-1424.36		-585.18	-68.3057	-51.0286	5.72764	0	-0.248217	0	0	-23.0768
862	Complex_1	0.00701297	0.0825829	-0.000109377	0	3.17932e-05	0	0	-0.0762651		0.000772762	0.0163183	-0.00227419	-0.000109377	0	3.17932e-05	0	0	0.0178725		0.000797551	-68.3691	-51.0281	5.72754	0	-0.248221	0	0	-23.1396		0.319232	-7016.72	-8364.01	4070.25	-124.965	-555.005	-27.6922	-10.8386	-1420.16		-584.296	-68.3691	-51.0281	5.72754	0	-0.248221	0	0	-23.1396
863	Complex_1	0.135325	0.768269	-0.00152023	0	-1.37317e-06	0	0	-0.632192		0.000770316	0.142449	-9.87039e-05	-0.00152023	0	-1.37317e-06	0	0	0.143235		0.000834053	-68.2993	-51.0308	5.72793	0	-0.248219	0	0	-23.0689		0.32068	-6997.42	-8358.5	4110.19	-126.01	-561.969	-27.6233	-16.1596	-1387.74		-629.61	-68.2993	-51.0308	5.72793	0	-0.248219	0	0	-23.0689
864	Complex_1	0.00871463	1.55037	-3.35603e-05	0	-2.9738e-06	0	0	-1.5421		0.000482887	-0.00953904	-0.0013196	-3.35603e-05	0	-2.9738e-06	0	0	-0.0087706		0.000587685	-68.3235	-51.0308	5.72778	0	-0.248147	0	0	-23.093		0.320672	-6948.88	-8337.47	4107.75	-124.164	-559.478	-26.8373	-9.64433	-1384.27		-614.767	-68.3235	-51.0308	5.72778	0	-0.248147	0	0	-23.093
865	Complex_1	0.00579601	1.86005	-0.000341313	0	9.33674e-06	0	0	-1.85381		-0.000118152	-0.00568811	0.000176668	-0.000341313	0	9.33674e-06	0	0	-0.00556311		3.03149e-05	-68.2663	-51.0322	5.72753	0	-0.248232	0	0	-23.0346		0.321173	-7020.78	-8348.9	4125.43	-123.809	-554.311	-24.396	-13.1936	-1427.93		-653.666	-68.2663	-51.0322	5.72753	0	-0.248232	0	0	-23.0346
866	Complex_1	0.00674424	0.700517	0.000107817	0	3.86068e-06	0	0	-0.693654		-0.000230095	0.00440335	-6.92107e-05	0.000107817	0	3.86068e-06	0	0	0.004527		-0.000166117	-68.2506	-51.0267	5.72566	0	-0.248224	0	0	-23.0215		0.320215	-6973.72	-8323.72	4079.01	-122.899	-556.389	-22.304	-10.6054	-1430		-586.813	-68.2506	-51.0267	5.72566	0	-0.248224	0	0	-23.0215
867	Complex_1	0.00197097	0.428067	-0.000158179	0	-5.94111e-06	0	0	-0.426255		0.000323315	0.00481345	-0.00019255	-0.000158179	0	-5.94111e-06	0	0	0.00478008		0.000390036	-68.3273	-51.0275	5.72775	0	-0.248215	0	0	-23.098		0.318612	-6956.23	-8262.65	4092.13	-121.457	-552.411	-24.1137	-12.8767	-1446.46		-628.379	-68.3273	-51.0275	5.72775	0	-0.248215	0	0	-23.098
868	Complex_1	-0.00243916	0.784952	0.000611273	0	-8.85385e-07	0	0	-0.786972		-0.00103022	0.00405279	0.000806675	0.000611273	0	-8.85385e-07	0	0	0.00359319		-0.000957456	-68.2188	-51.0274	5.72542	0	-0.248219	0	0	-22.9896		0.320907	-6977.72	-8365.54	4181.32	-119.85	-552.38	-25.7049	-9.53211	-1415.66		-670.377	-68.2188	-51.0274	5.72542	0	-0.248219	0	0	-22.9896
869	Complex_1	-0.00427036	0.474404	-2.66902e-05	0	-1.79314e-06	0	0	-0.478586		-5.98701e-05	-0.00204214	5.62879e-05	-2.66902e-05	0	-1.79314e-06	0	0	-0.00207386		3.90902e-06	-68.4137	-51.0325	5.73051	0	-0.248193	0	0	-23.1839		0.320388	-6976.97	-8358.48	4051.13	-125.714	-551.184	-25.0271	-12.6481	-1395.9		-559.148	-68.4137	-51.0325	5.73051	0	-0.248193	0	0	-23.1839
870	Complex_1	-25.9596	7.02673	1.89649	-3.83228	-3.94447	-0.000760121	0	0.699477		-27.8048	2.77973	2.12304	1.89649	0	-0.00747345	0	0	-1.98243		0.7501	-68.2965	-51.0309	5.72706	0	-0.248233	0	0	-23.0658		0.321367	-7025.34	-8403.27	4079.63	-130.348	-556.669	-24.245	-15.258	-1363.69		-611.483	-68.2965	-51.0309	5.72706	0	-0.248233	0	0	-23.0658
871	Complex_1	-23.6719	4.88862	1.9333	-3.7195	-4.16429	-0.374695	0	1.09251		-23.3278	3.45108	1.37254	1.9333	0	-0.00800416	0	0	-1.3774		1.53064	-68.2376	-51.0321	5.72417	0	-0.248252	0	0	-23.0048		0.323313	-6925.69	-8414.77	4110.84	-129.906	-553.978	-24.5331	-11.2635	-1364.83		-537.245	-68.2376	-51.0321	5.72417	0	-0.248252	0	0	-23.0048
872	Complex_1	-32.174	5.78336	1.91384	-4.23389	-4.39407	-0.278105	0	-0.58058		-30.3845	2.63557	2.06488	1.91384	0	0.00187896	0	0	-1.74545		0.400434	-68.4161	-51.035	5.73098	0	-0.248205	0	0	-23.1836		0.319719	-7020.12	-8413.77	4068.7	-133.719	-555.795	-28.5933	-16.4459	-1356.08		-584.425	-68.4161	-51.035	5.73098	0	-0.248205	0	0	-23.1836
873	Complex_1	-26.3271	1.58207	1.57937	-4.02732	-3.88213	-0.170904	0	2.18576		-23.594	1.65483	0.277956	1.57937	0	0.00875661	0	0	-0.527159		0.315906	-68.3385	-51.0279	5.72723	0	-0.248199	0	0	-23.1086		0.318975	-6968.43	-8420.5	4081.56	-131.742	-565.347	-29.0985	-14.3934	-1342.35		-546.568	-68.3385	-51.0279	5.72723	0	-0.248199	0	0	-23.1086
874	Complex_1	-22.6363	3.30668	0.91563	-3.84227	-4.02024	-0.187746	0	1.20756		-20.0159	1.89194	-0.108491	0.91563	0	-0.00762138	0	0	-0.223358		1.31578	-68.3145	-51.0261	5.72636	0	-0.248219	0	0	-23.0862		0.319615	-7007.85	-8433.4	4017.98	-134.829	-557.677	-27.2938	-13.573	-1329.43		-529.63	-68.3145	-51.0261	5.72636	0	-0.248219	0	0	-23.0862
875	Complex_1	-24.9279	0.959756	1.69096	-3.15737	-3.71009	-0.0846587	0	2.52033		-23.1468	2.3628	0.154122	1.69096	0	-0.00617197	0	0	-0.530931		1.05481	-68.3115	-51.0321	5.72736	0	-0.248209	0	0	-23.0796		0.320994	-6999.29	-8345.71	4106.72	-126.252	-557.223	-22.9249	-14.9562	-1405.25		-633.694	-68.3115	-51.0321	5.72736	0	-0.248209	0	0	-23.0796
876	Complex_1	-28.2235	7.58387	1.93502	-4.18663	-3.52969	-0.00964558	0	-1.84417		-28.1723	2.4194	2.08415	1.93502	0	-0.00199375	0	0	-1.97812		0.380352	-68.2177	-51.0319	5.72913	0	-0.24821	0	0	-22.9856		0.318997	-6989.33	-8343.3	4110.03	-130.039	-552.713	-24.8251	-13.438	-1401.09		-633.949	-68.2177	-51.0319	5.72913	0	-0.24821	0	0	-22.9856
877	Complex_1	-26.6132	5.39157	1.82521	-3.33157	-3.76107	-0.440961	0	-0.72033		-25.5761	1.6804	0.0338839	1.82521	0	0.0167283	0	0	-0.283688		0.0882622	-68.273	-51.031	5.72782	0	-0.248215	0	0	-23.0421		0.32059	-6997.94	-8418.23	4096.86	-132.874	-556.581	-26.9656	-17.1206	-1371.19		-571.84	-68.273	-51.031	5.72782	0	-0.248215	0	0	-23.0421
878	Complex_1	-26.2922	2.30404	0.229256	-4.03497	-2.98588	-0.0171548	0	-0.432428		-21.3551	0.613846	1.2817	0.229256	0	0.000164824	0	0	-1.00565		0.108376	-68.3356	-51.0266	5.72784	0	-0.248248	0	0	-23.1082		0.319637	-7050.96	-8424.77	4026.43	-136.001	-556.61	-24.1477	-18.4533	-1366.58		-550.826	-68.3356	-51.0266	5.72784	0	-0.248248	0	0	-23.1082
879	Complex_1	-29.6379	3.35507	2.64222	-3.85065	-4.96304	-0.278661	0	4.39101		-30.9338	3.62008	1.94076	2.64222	0	0.000732027	0	0	-1.61795		0.654318	-68.3965	-51.028	5.72813	0	-0.248247	0	0	-23.1678		0.319387	-6910.17	-8299.75	4159.6	-128.902	-560.348	-23.9244	-20.4561	-1416.94		-619.454	-68.3965	-51.028	5.72813	0	-0.248247	0	0	-23.1678
880	Complex_1	-27.953	3.46273	2.97098	-4.24839	-4.40747	-0.580362	0	1.67561		-26.8261	4.07742	2.07093	2.97098	0	0.00164504	0	0	-2.18514		1.219	-68.192	-51.0323	5.72637	0	-0.248253	0	0	-22.9601		0.322213	-7057.5	-8319	4037.95	-128.036	-559.874	-25.5556	-18.0355	-1386.97		-657.978	-68.192	-51.0323	5.72637	0	-0.248253	0	0	-22.9601
881	Complex_1	-21.8056	8.32102	3.01731	-3.64941	-4.11067	-0.00124634	0	3.3061		-28.6886	3.50031	-0.0850002	3.01731	0	-0.00228927	0	0	-0.24029		0.810584	-68.1954	-51.0352	5.72769	0	-0.248232	0	0	-22.9622		0.322552	-6953.66	-8305.35	4098.13	-125.982	-560.252	-24.0567	-14.0707	-1404.42		-617.656	-68.1954	-51.0352	5.72769	0	-0.248232	0	0	-22.9622
882	Complex_1	-28.7301	-0.421555	2.28037	-3.49089	-4.64231	-0.700155	0	8.24265		-29.9982	3.15264	2.2481	2.28037	0	0.00180214	0	0	-2.07037		0.692725	-68.262	-51.0289	5.72664	0	-0.248203	0	0	-23.0317		0.320249	-6902.95	-8258.61	4170.39	-124.765	-558.407	-24.0581	-11.6037	-1439.95		-655.947	-68.262	-51.0289	5.72664	0	-0.248203	0	0	-23.0317
883	Complex_1	-18.4666	1.95756	1.94834	-3.33245	-3.56749	-0.160976	0	4.72664		-20.0383	2.00427	0.356893	1.94834	0	0.00876275	0	0	-0.505411		0.195684	-68.3339	-51.0254	5.72569	0	-0.248227	0	0	-23.105		0.31902	-7074.61	-8314.68	3965.41	-125.791	-557.91	-23.9281	-19.0713	-1393.26		-605.383	-68.3339	-51.0254	5.72569	0	-0.248227	0	0	-23.105
884	Complex_1	-27.9288	-2.92466	0.866342	-3.85987	-3.97944	-0.36861	0	5.65653		-23.3191	2.00019	0.0988854	0.866342	0	-0.00626753	0	0	-0.337779		1.379	-68.0806	-50.1755	5.75762	0	-0.24824	0	0	-23.6864		0.271872	-6969.58	-8278.88	4035.04	-127.763	-552.967	-23.5921	-18.3255	-1434.82		-568.271	-68.0806	-50.1755	5.75762	0	-0.24824	0	0	-23.6864
885	Complex_1	-26.4091	-0.789849	2.17576	-3.8487	-4.50155	-0.599427	0	4.38374		-23.229	3.89303	1.06094	2.17576	0	-0.00714045	0	0	-1.0902		1.75367	-68.3125	-51.0246	5.72637	0	-0.2482	0	0	-23.0842		0.318088	-6974.02	-8299.16	4054.77	-126.887	-552.672	-24.2808	-15.303	-1443.48		-567.019	-68.3125	-51.0246	5.72637	0	-0.2482	0	0	-23.0842
886	Complex_1	-24.8206	-0.841601	2.53302	-3.26927	-4.87548	-0.797348	0	8.30905		-25.879	3.77473	1.9376	2.53302	0	0.00223438	0	0	-1.78997		1.09184	-68.2624	-51.018	5.73036	0	-0.248038	0	0	-23.0387		0.311927	-6906.79	-8329.4	4163.95	-127.037	-560.671	-21.9918	-12.4404	-1417.52		-601.685	-68.2624	-51.018	5.73036	0	-0.248038	0	0	-23.0387
887	Complex_1	-28.1919	5.42157	2.17792	-3.58477	-4.70811	-1.39834	0	4.05433		-30.1545	3.0275	2.0388	2.17792	0	5.84503e-05	0	0	-1.91725		0.727958	-68.2933	-51.0225	5.72639	0	-0.248212	0	0	-23.0674		0.31837	-6988.53	-8339.86	4085.17	-124.573	-562.343	-25.2619	-12.9895	-1412.22		-596.444	-68.2933	-51.0225	5.72639	0	-0.248212	0	0	-23.0674
888	Complex_1	-30.2569	2.73322	1.57103	-3.4623	-4.28765	-1.19086	0	4.02182		-29.6422	2.35829	2.58755	1.57103	0	0.00955577	0	0	-2.05275		0.242897	-68.2154	-51.0305	5.72792	0	-0.248215	0	0	-22.984		0.319279	-6935.26	-8338.62	4118.11	-127.82	-554.317	-23.8974	-12.2032	-1397.04		-599.475	-68.2154	-51.0305	5.72792	0	-0.248215	0	0	-22.984
889	Complex_1	0.02897	1.83661	0.000284492	0	-1.7907e-06	0	0	-1.8087		0.00078015	0.00475375	-0.00286571	0.000284492	0	-1.7907e-06	0	0	0.00641109		0.000925679	-68.2524	-51.0271	5.72635	0	-0.248176	0	0	-23.0232		0.319688	-6906.33	-8353.72	4061.9	-125.864	-542.704	-24.6572	-11.5029	-1396.5		-513.272	-68.2524	-51.0271	5.72635	0	-0.248176	0	0	-23.0232
890	Complex_1	0.0279262	1.75506	-0.00113241	0	-4.28321e-06	0	0	-1.72217		-0.0038226	0.00650944	0.0068784	-0.00113241	0	-4.28321e-06	0	0	0.00445694		-0.00368921	-68.3606	-51.0366	5.72816	0	-0.248224	0	0	-23.1285		0.324529	-7055.91	-8356.18	4028.4	-122.754	-559.796	-26.8425	-11.6809	-1399.53		-607.542	-68.3606	-51.0366	5.72816	0	-0.248224	0	0	-23.1285
891	Complex_1	-29.6446	4.77603	2.40841	-3.93404	-4.72708	-0.994773	0	1.0729		-28.2461	3.26164	2.2598	2.40841	0	0.00514054	0	0	-2.15526		0.743552	-68.166	-51.0296	5.7284	0	-0.248142	0	0	-22.9352		0.318598	-7031.26	-8333.99	4110.01	-127.629	-565.177	-28.574	-11.8948	-1430.56		-643.443	-68.166	-51.0296	5.7284	0	-0.248142	0	0	-22.9352
892	Complex_1	-30.6728	3.2177	1.58359	-3.85597	-4.16562	-1.24649	0	3.34861		-29.5547	2.45646	2.28163	1.58359	0	0.00697873	0	0	-1.73689		0.321157	-68.3626	-51.0276	5.72873	0	-0.248183	0	0	-23.1331		0.317612	-6970.85	-8320.2	4066.78	-124.684	-556.35	-29.5978	-14.2116	-1377.78		-614.809	-68.3626	-51.0276	5.72873	0	-0.248183	0	0	-23.1331
893	Complex_1	-29.2061	1.09209	1.72624	-2.99687	-4.34177	-0.748759	0	4.27729		-28.2143	2.45652	1.56874	1.72624	0	-0.0020293	0	0	-1.50123		0.664811	-68.0962	-50.1808	5.75108	0	-0.248226	0	0	-23.7025		0.284291	-6966.45	-8332.69	4153.71	-127.932	-555.084	-26.5027	-9.56624	-1390.07		-678.319	-68.0962	-50.1808	5.75108	0	-0.248226	0	0	-23.7025
894	Complex_1	-25.0955	5.47004	0.667541	-2.90739	-4.18957	-0.521594	0	0.506822		-24.1213	1.51382	-0.361534	0.667541	0	-0.00834843	0	0	0.092288		1.12387	-68.2538	-51.028	5.72741	0	-0.248211	0	0	-23.0242		0.319202	-7005.34	-8381.02	4060.67	-128.108	-565.402	-29.1346	-12.8911	-1366.73		-582.727	-68.2538	-51.028	5.72741	0	-0.248211	0	0	-23.0242
895	Complex_1	-27.4233	1.486	3.55069	-3.55712	-4.42134	-0.855214	0	4.83389		-28.4602	4.66749	2.43127	3.55069	0	0.00365951	0	0	-2.32121		1.00307	-68.2646	-51.0334	5.72733	0	-0.248209	0	0	-23.0319		0.321558	-7035.02	-8354.96	4051.83	-128.19	-561.01	-31.1137	-11.9718	-1381.07		-618.535	-68.2646	-51.0334	5.72733	0	-0.248209	0	0	-23.0319
896	Complex_1	-31.8089	-1.6504	2.38782	-3.65391	-4.43953	-0.354774	0	5.00605		-29.1041	3.10649	2.26476	2.38782	0	0.0006309	0	0	-1.93023		0.383497	-68.3083	-51.0274	5.72621	0	-0.248236	0	0	-23.079		0.320062	-7013.39	-8357.97	4060.96	-127.435	-557.046	-26.8306	-11.7659	-1379.11		-614.192	-68.3083	-51.0274	5.72621	0	-0.248236	0	0	-23.079
897	Complex_1	-22.3525	5.0759	2.42432	-3.2546	-4.5804	-0.0399989	0	6.19407		-28.1717	2.80892	-0.33852	2.42432	0	-0.00208523	0	0	-0.0937901		0.818996	-68.3449	-51.0279	5.72705	0	-0.248201	0	0	-23.1152		0.319341	-6939.49	-8326	4073.53	-128.426	-566.459	-26.2435	-10.893	-1392.43		-562.552	-68.3449	-51.0279	5.72705	0	-0.248201	0	0	-23.1152
898	Complex_1	-29.9505	3.38029	1.57458	-3.72802	-4.49147	-0.987632	0	3.00518		-28.7034	2.73109	2.23947	1.57458	0	0.00553205	0	0	-1.81161		0.723117	-68.3286	-51.0288	5.7284	0	-0.248194	0	0	-23.0985		0.318456	-6972.72	-8294.31	4029.04	-123.485	-568.502	-26.3502	-14.1719	-1425.07		-549.866	-68.3286	-51.0288	5.7284	0	-0.248194	0	0	-23.0985
899	Complex_1	-26.8988	-1.35279	3.20336	-4.36508	-4.2292	-0.829479	0	7.49762		-26.8233	4.614	2.19449	3.20336	0	0.00588021	0	0	-2.0542		1.26447	-68.3074	-51.0244	5.72707	0	-0.248171	0	0	-23.0799		0.317931	-6958.1	-8364.79	4118	-127.553	-556.541	-25.605	-17.3728	-1372.37		-611.87	-68.3074	-51.0244	5.72707	0	-0.248171	0	0	-23.0799
900	Complex_1	-31.8464	1.20449	2.59081	-3.83575	-4.3578	-0.673416	0	2.76549		-29.5402	3.40524	1.81659	2.59081	0	-0.00133514	0	0	-1.82248		0.821659	-68.4113	-51.0231	5.72784	0	-0.248177	0	0	-23.1848		0.317007	-7012.34	-8293.46	4077.25	-127.662	-563.123	-24.702	-13.47	-1424.16		-643.018	-68.4113	-51.0231	5.72784	0	-0.248177	0	0	-23.1848
901	Complex_1	-31.922	3.36507	1.73704	-3.59863	-4.51587	-0.596423	0	1.64951		-29.9627	2.35973	2.27513	1.73704	0	0.00134436	0	0	-1.95617		0.302378	-68.3027	-51.033	5.72727	0	-0.248219	0	0	-23.0705		0.321684	-7043.89	-8352.02	4050.29	-129.053	-567.582	-27.7434	-12.745	-1405.37		-599.67	-68.3027	-51.033	5.72727	0	-0.248219	0	0	-23.0705
902	Complex_1	-30.3875	3.11983	1.15978	-3.7899	-4.41152	-0.590509	0	4.73873		-30.6139	1.75758	2.71973	1.15978	0	0.00704712	0	0	-2.15817		0.0291896	-68.3158	-51.0283	5.73009	0	-0.248207	0	0	-23.0863		0.316919	-7112.49	-8300.93	4024.93	-125.958	-563.175	-26.634	-15.3228	-1439.55		-665.851	-68.3158	-51.0283	5.73009	0	-0.248207	0	0	-23.0863
903	Complex_1	-28.637	4.78249	1.54197	-3.35116	-4.03124	-0.893805	0	3.54228		-30.2275	2.20867	2.53562	1.54197	0	0.00409759	0	0	-2.15965		0.286647	-68.2836	-51.0275	5.72689	0	-0.248192	0	0	-23.0546		0.319715	-7049.38	-8343.72	4043.96	-128.394	-548.981	-27.0712	-16.1677	-1385.89		-643.108	-68.2836	-51.0275	5.72689	0	-0.248192	0	0	-23.0546
904	Complex_1	-27.4936	-0.148045	2.05809	-3.77939	-3.87478	-0.00912255	0	4.59768		-26.338	3.0772	2.12296	2.05809	0	-0.00633977	0	0	-1.93921		0.841696	-68.3214	-51.0252	5.72988	0	-0.248177	0	0	-23.0929		0.314999	-7087.49	-8344.97	4003.33	-126.023	-560.045	-26.7869	-11.7657	-1407.8		-613.43	-68.3214	-51.0252	5.72988	0	-0.248177	0	0	-23.0929
905	Complex_1	0.0268912	1.05756	-0.000537371	0	-4.7824e-06	0	0	-1.03029		0.000159776	0.0216683	0.00122411	-0.000537371	0	-4.7824e-06	0	0	0.0207276		0.000258747	-68.411	-51.0328	5.72897	0	-0.248147	0	0	-23.1802		0.321224	-6966.67	-8327.91	4043.72	-123.878	-550.682	-25.7085	-12.0068	-1389.76		-580.441	-68.411	-51.0328	5.72897	0	-0.248147	0	0	-23.1802
906	Complex_1	0.0245418	1.01562	-0.000303212	0	9.82113e-06	0	0	-0.9911		0.000310909	0.0197869	-0.00025691	-0.000303212	0	9.82113e-06	0	0	0.0199286		0.000408599	-68.3115	-51.033	5.73185	0	-0.248189	0	0	-23.0801		0.317887	-6943.38	-8367.39	4055.13	-125.597	-553.232	-26.0364	-13.4677	-1375.51		-537.278	-68.3115	-51.033	5.73185	0	-0.248189	0	0	-23.0801
907	Complex_1	0.0186583	0.985169	0.000544332	0	-1.48648e-07	0	0	-0.966885		-0.000169962	0.0148671	-0.0008626	0.000544332	0	-1.48648e-07	0	0	0.0152215		-3.59033e-05	-68.2802	-51.0308	5.72979	0	-0.248201	0	0	-23.049		0.318025	-7006.83	-8357.04	3989.95	-125.775	-556.253	-30.3497	-11.5674	-1379.47		-536.323	-68.2802	-51.0308	5.72979	0	-0.248201	0	0	-23.049
908	Complex_1	-26.1344	-2.32173	0.322838	-3.52818	-3.93466	-0.0616742	0	7.05245		-23.6635	1.12206	0.301253	0.322838	0	-0.00531763	0	0	-0.621708		1.12499	-68.2049	-51.0298	5.72733	0	-0.248218	0	0	-22.9739		0.319577	-6919	-8336.89	4078.39	-128.648	-553.798	-25.9175	-11.2694	-1396.25		-544.621	-68.2049	-51.0298	5.72733	0	-0.248218	0	0	-22.9739
909	Complex_1	-30.2985	-3.14254	1.25205	-4.01586	-4.52716	-0.851815	0	8.27912		-27.2923	1.8164	0.073227	1.25205	0	-0.00248217	0	0	-0.237386		0.730996	-67.974	-50.1889	5.75625	0	-0.248253	0	0	-23.5733		0.280192	-7001.65	-8335.57	4068.15	-131.326	-556.064	-27.152	-11.1104	-1403.01		-605.567	-67.974	-50.1889	5.75625	0	-0.248253	0	0	-23.5733
910	Complex_1	-20.9399	-2.15235	1.29511	-3.81581	-4.62036	-0.0576352	0	7.33245		-18.9213	2.40489	0.412941	1.29511	0	0.000291176	0	0	-0.412028		1.10857	-68.1778	-51.0312	5.72773	0	-0.24819	0	0	-22.9466		0.32052	-7024.54	-8295.56	4034.86	-125.528	-556.587	-26.4819	-12.0986	-1430.42		-612.724	-68.1778	-51.0312	5.72773	0	-0.24819	0	0	-22.9466
911	Complex_1	-24.5324	2.3095	1.43401	-2.94762	-4.46468	-0.648576	0	8.60335		-28.8184	1.43055	-0.347958	1.43401	0	0.00582796	0	0	0.190116		0.148553	-68.2888	-51.0281	5.72628	0	-0.248211	0	0	-23.0595		0.320736	-6941.07	-8386.37	4060.84	-125.551	-558.727	-28.0069	-11.9679	-1343.44		-547.84	-68.2888	-51.0281	5.72628	0	-0.248211	0	0	-23.0595
912	Complex_1	-22.5513	3.69042	1.36568	-3.27313	-3.74943	-0.0385223	0	1.38094		-21.9273	1.61616	-0.204234	1.36568	0	0.00586004	0	0	-0.211151		0.660002	-68.2671	-51.0295	5.73025	0	-0.248155	0	0	-23.0386		0.318842	-7059.53	-8334.99	4048.41	-126.03	-561.955	-23.5618	-12.0428	-1422.12		-627.243	-68.2671	-51.0295	5.73025	0	-0.248155	0	0	-23.0386
913	Complex_1	-18.5078	9.42688	1.14799	-2.67403	-2.78792	-2.51257e-05	0	-1.53989		-22.0808	1.47122	0.930789	1.14799	0	-0.000957952	0	0	-1.08781		0.481208	-68.3115	-51.0241	5.72865	0	-0.248179	0	0	-23.0841		0.316299	-6990.61	-8350.75	3998.64	-128.792	-563.495	-26.1024	-11.9467	-1362.79		-545.376	-68.3115	-51.0241	5.72865	0	-0.248179	0	0	-23.0841
914	Complex_1	-21.1297	8.26032	3.72428	-2.96372	-4.09569	-0.369077	0	3.50076		-29.1865	3.77778	-0.399083	3.72428	0	0.00407652	0	0	0.517513		-0.069007	-68.4201	-51.022	5.7245	0	-0.248253	0	0	-23.1943		0.32	-7019.56	-8324.48	4043.8	-128.62	-555.939	-25.333	-13.7402	-1394.61		-620.636	-68.4201	-51.022	5.7245	0	-0.248253	0	0	-23.1943
915	Complex_1	-28.9522	1.38613	2.1464	-2.87836	-4.60769	-1.36297	0	6.47418		-30.1099	2.89536	2.48967	2.1464	0	0.00187374	0	0	-2.0805		0.33791	-68.2203	-51.0276	5.72697	0	-0.248207	0	0	-22.9907		0.319347	-7024.33	-8329.86	4068.63	-126.282	-568.871	-26.7204	-10.7875	-1402.33		-628.119	-68.2203	-51.0276	5.72697	0	-0.248207	0	0	-22.9907
916	Complex_1	-29.9901	2.99704	2.01188	-4.01709	-4.37237	-0.0230955	0	-0.343406		-26.243	3.17101	2.15921	2.01188	0	-0.00902488	0	0	-2.10677		1.11571	-68.2566	-51.0236	5.72751	0	-0.2482	0	0	-23.0299		0.317576	-6991.79	-8356.13	4045.94	-127.29	-566.329	-22.5687	-15.3164	-1405.24		-544.86	-68.2566	-51.0236	5.72751	0	-0.2482	0	0	-23.0299
917	Complex_1	-22.8703	-6.78703	3.13601	-3.6094	-5.07195	-0.708774	0	7.74912		-17.5783	5.64415	-0.410608	3.13601	0	0.00101174	0	0	0.417998		2.49974	-68.3306	-51.0335	5.73051	0	-0.248229	0	0	-23.1015		0.322214	-7121.54	-8326.66	3984.88	-128.093	-558.803	-25.0973	-21.3471	-1402.37		-644.05	-68.3306	-51.0335	5.73051	0	-0.248229	0	0	-23.1015
918	Complex_1	0.00594881	0.697681	0.000812479	0	6.14526e-06	0	0	-0.693288		0.000737718	-0.00438546	-0.00427801	0.000812479	0	6.14526e-06	0	0	-0.00177853		0.000852448	-68.1847	-51.0277	5.72844	0	-0.248218	0	0	-22.9552		0.317986	-7153.25	-8293.56	3928.26	-122.969	-561.847	-23.1031	-21.1079	-1439.35		-619.569	-68.1847	-51.0277	5.72844	0	-0.248218	0	0	-22.9552
919	Complex_1	0.0645922	0.930879	0.00136698	0	-1.30491e-05	0	0	-0.867411		-0.000229595	0.0608833	-0.00299158	0.00136698	0	-1.30491e-05	0	0	0.0626218		-0.000100772	-68.3803	-51.0247	5.72646	0	-0.248189	0	0	-23.1525		0.3186	-6975.26	-8268.12	3965.82	-117.457	-547.88	-20.0824	-12.2882	-1448.58		-526.677	-68.3803	-51.0247	5.72646	0	-0.248189	0	0	-23.1525
920	Complex_1	-28.1976	5.95931	1.0956	-2.00053	-4.52249	-1.21051	0	0.882686		-28.4017	0.995178	0.277536	1.0956	0	6.0168e-05	0	0	-0.406094		0.0280745	-67.9553	-50.1812	5.75654	0	-0.248216	0	0	-23.5567		0.274246	-7094.89	-8299.82	3969.1	-126.801	-555.542	-29.4204	-7.20413	-1395.32		-649.869	-67.9553	-50.1812	5.75654	0	-0.248216	0	0	-23.5567
921	Complex_1	-31.2948	-4.08934	1.23388	-4.04615	-4.77395	-0.980614	0	10.6003		-29.2389	1.70886	-0.139417	1.23388	0	-0.0037075	0	0	-0.0785211		0.696622	-68.1452	-50.1707	5.75422	0	-0.248202	0	0	-23.7521		0.271652	-7003.37	-8341.23	4058.98	-128.04	-556.391	-24.8956	-14.4689	-1406.84		-590.495	-68.1452	-50.1707	5.75422	0	-0.248202	0	0	-23.7521
922	Complex_1	-29.514	5.49142	0.752697	-2.47371	-4.79176	-0.985946	0	2.42118		-29.9279	0.969256	0.0223146	0.752697	0	-0.000581531	0	0	-0.0340502		0.228876	-68.1131	-50.179	5.75378	0	-0.248214	0	0	-23.7158		0.27609	-7039.2	-8322.99	4018.92	-129.073	-557.89	-28.8531	-16.0456	-1404.53		-598.74	-68.1131	-50.179	5.75378	0	-0.248214	0	0	-23.7158
923	Complex_1	-29.6933	5.45168	0.456958	-1.72856	-4.85451	-0.767449	0	1.79432		-30.0457	0.72034	0.290426	0.456958	0	0.00150938	0	0	-0.318823		0.290269	-67.9889	-50.1767	5.75865	0	-0.24813	0	0	-23.5935		0.270797	-6937.06	-8249.7	4100.62	-123.955	-554.21	-27.5269	-21.7175	-1455.44		-605.125	-67.9889	-50.1767	5.75865	0	-0.24813	0	0	-23.5935
924	Complex_1	-33.3031	-4.45576	1.47655	-4.0162	-4.59357	-1.1597	0	9.72406		-30.2784	1.51599	0.0654605	1.47655	0	0.00949287	0	0	-0.21679		0.181269	-68.0293	-50.1759	5.7562	0	-0.248202	0	0	-23.6338		0.272478	-7065.32	-8313.36	3990.77	-127.685	-550.167	-28.6933	-22.1177	-1418.68		-595.392	-68.0293	-50.1759	5.7562	0	-0.248202	0	0	-23.6338
925	Complex_1	-25.0373	-0.943023	1.0723	-3.58265	-3.89946	-0.154172	0	6.52601		-24.0563	1.34254	-0.853994	1.0723	0	-0.00473972	0	0	0.330712		0.798265	-68.2781	-51.0281	5.72919	0	-0.248226	0	0	-23.047		0.315996	-6910.1	-8341.87	4108.73	-130.243	-549.007	-21.4347	-22.5968	-1379.69		-573.988	-68.2781	-51.0281	5.72919	0	-0.248226	0	0	-23.047
926	Complex_1	-27.9326	3.1095	2.64487	-3.36758	-4.59145	-0.943649	0	3.5055		-28.2898	3.75126	2.22995	2.64487	0	-6.07085e-05	0	0	-2.04902		0.925528	-68.2171	-51.0376	5.7344	0	-0.248214	0	0	-22.985		0.31934	-7020.67	-8317.77	4051.96	-127.824	-563.039	-27.4561	-20.465	-1411.83		-604.243	-68.2171	-51.0376	5.7344	0	-0.248214	0	0	-22.985
927	Complex_1	-27.744	0.589156	2.03181	-3.34489	-4.56699	-0.799747	0	6.67864		-28.332	2.96468	2.29753	2.03181	0	0.00668063	0	0	-1.9413		0.569958	-68.3069	-51.0267	5.72878	0	-0.248197	0	0	-23.078		0.31725	-7012.67	-8317.66	4015.64	-125.57	-554.198	-27.0886	-11.5796	-1405.22		-586.992	-68.3069	-51.0267	5.72878	0	-0.248197	0	0	-23.078
928	Complex_1	-27.7132	2.44187	3.06217	-3.52024	-4.35047	-0.750732	0	5.53988		-30.1357	3.92176	2.41728	3.06217	0	-0.000850622	0	0	-2.38776		0.830918	-68.2411	-51.0265	5.72778	0	-0.248202	0	0	-23.0122		0.318101	-6940.77	-8349.6	4101.69	-129.167	-558.416	-26.9281	-15.0083	-1380.04		-583.3	-68.2411	-51.0265	5.72778	0	-0.248202	0	0	-23.0122
929	Complex_1	-21.7656	2.38741	3.67911	-3.25682	-4.53452	-1.0988	0	3.45345		-22.3955	4.70563	0.356882	3.67911	0	0.0163919	0	0	-0.858352		1.5116	-68.173	-51.0282	5.73467	0	-0.248194	0	0	-22.9442		0.312931	-7023.46	-8329.2	4044.64	-128.041	-559.439	-25.0146	-13.0338	-1400.55		-612.823	-68.173	-51.0282	5.73467	0	-0.248194	0	0	-22.9442
930	Complex_1	8.18545e-12	-3.63798e-12	2.27374e-12	0	0	0	0	7.95808e-12		1.13687e-13	0	0	0	0	0	0	0	0		0	-68.2132	-51.0306	5.7288	0	-0.24819	0	0	-22.9832		0.319966	-7000.14	-8355.93	4032.03	-126.73	-565.107	-26.6502	-16.7045	-1374.98		-566.069	-68.2132	-51.0306	5.7288	0	-0.24819	0	0	-22.9832
931	Complex_1	-2.18279e-11	1.81899e-12	9.09495e-13	0	0	0	0	-1.68257e-11		1.13687e-13	0	0	0	0	0	0	0	0		0	-68.1778	-51.0214	5.72314	0	-0.248224	0	0	-22.9506		0.319268	-6921.38	-8340.09	4115.2	-125.451	-550.838	-27.164	-13.6917	-1358.97		-620.374	-68.1778	-51.0214	5.72314	0	-0.248224	0	0	-22.9506
932	Complex_1	-27.8212	7.63364	2.30745	-3.47166	-4.18502	-1.34762	0	-0.0822222		-28.6757	3.24926	2.1682	2.30745	0	0.00763309	0	0	-1.8426		0.608584	-68.3434	-51.0286	5.72909	0	-0.248146	0	0	-23.1144		0.318575	-7026.68	-8343.05	4057.35	-130.696	-571.127	-33.0306	-13.2118	-1365.82		-627.097	-68.3434	-51.0286	5.72909	0	-0.248146	0	0	-23.1144
933	Complex_1	-26.9208	5.58943	1.52572	-3.41354	-4.20275	-0.699718	0	3.6664		-29.3863	2.24273	2.08745	1.52572	0	0.00164525	0	0	-1.60139		0.229303	-68.4027	-51.0253	5.73002	0	-0.248188	0	0	-23.1756		0.316328	-6965.8	-8382.17	4063.04	-130.885	-566.158	-28.5951	-11.1934	-1339.82		-570.03	-68.4027	-51.0253	5.73002	0	-0.248188	0	0	-23.1756
934	Complex_1	-26.3682	5.89895	2.99036	-3.67785	-4.04937	-0.817094	0	1.17769		-27.8909	4.09734	2.04014	2.99036	0	-0.00136133	0	0	-1.91045		0.978655	-68.2359	-51.0271	5.7276	0	-0.248175	0	0	-23.0068		0.318606	-6945.33	-8294.87	4141.34	-131.765	-559.592	-26.256	-11.9105	-1408.84		-653.431	-68.2359	-51.0271	5.7276	0	-0.248175	0	0	-23.0068
935	Complex_1	-21.0123	1.13239	2.65878	-3.92533	-3.63173	-0.000738045	0	2.92775		-20.1734	3.20389	-0.0659597	2.65878	0	-0.00754689	0	0	-0.57395		1.19256	-68.3118	-51.0408	5.73038	0	-0.24828	0	0	-23.0766		0.323617	-6928.97	-8371.71	4152.31	-128.929	-551.187	-24.3927	-13.1283	-1407.03		-584.896	-68.3118	-51.0408	5.73038	0	-0.24828	0	0	-23.0766
936	Complex_1	0.0277823	1.17599	-0.00293634	0	-4.43724e-05	0	0	-1.14272		-0.00250766	0.0340061	0.0048991	-0.00293634	0	-4.43724e-05	0	0	0.0344572		-0.00236945	-68.17	-50.1802	5.76076	0	-0.248119	0	0	-23.7755		0.273166	-6946.95	-8383.4	4134.57	-125.424	-556.322	-25.3605	-12.1904	-1382.38		-596.438	-68.17	-50.1802	5.76076	0	-0.248119	0	0	-23.7755
937	Complex_1	-26.773	-1.87383	0.734504	-3.53082	-3.96478	-0.152961	0	4.92613		-22.9113	0.963088	0.673321	0.734504	0	0.00643356	0	0	-0.560327		0.109156	-68.3907	-51.0182	5.72444	0	-0.248205	0	0	-23.1646		0.315892	-6999.54	-8345.31	4034.16	-129.391	-558.152	-28.0155	-11.9396	-1396.52		-564.369	-68.3907	-51.0182	5.72444	0	-0.248205	0	0	-23.1646
938	Complex_1	-29.4858	2.55653	1.57486	-3.09615	-4.14392	-0.0419533	0	3.47196		-29.8071	2.02457	2.52153	1.57486	0	-0.00441826	0	0	-2.20149		0.134082	-68.18	-51.0283	5.72811	0	-0.248198	0	0	-22.95		0.318409	-6991.82	-8357.59	4097.33	-129.651	-550.57	-27.4899	-9.60949	-1421.64		-592.603	-68.18	-51.0283	5.72811	0	-0.248198	0	0	-22.95
939	Complex_1	-22.2274	2.48417	2.36303	-3.19515	-4.04327	-0.321661	0	1.2442		-20.7587	3.40727	0.234996	2.36303	0	0.00942913	0	0	-0.0509193		0.850731	-68.3211	-51.0278	5.72788	0	-0.248225	0	0	-23.0925		0.319497	-7048.24	-8329.18	4034.22	-132.538	-555.331	-31.6899	-16.3654	-1402.69		-614.664	-68.3211	-51.0278	5.72788	0	-0.248225	0	0	-23.0925
940	Complex_1	-24.408	1.94337	0.954647	-3.33008	-3.47773	-0.0802717	0	2.37034		-22.7883	1.12612	0.21338	0.954647	0	0.000834693	0	0	0.00629529		-0.0490398	-68.3091	-51.032	5.72879	0	-0.248231	0	0	-23.0782		0.320581	-6968.75	-8371.91	4070.68	-128.919	-550.442	-26.1333	-14.6938	-1381.19		-566.144	-68.3091	-51.032	5.72879	0	-0.248231	0	0	-23.0782
941	Complex_1	-20.879	1.45739	2.40823	-2.36347	-3.96796	-0.142971	0	5.34704		-23.6173	2.56624	-0.490419	2.40823	0	0.000806202	0	0	-0.0343439		0.681968	-68.3485	-51.024	5.72667	0	-0.248223	0	0	-23.1213		0.31844	-7022.87	-8361.05	4016.28	-129.595	-555.822	-30.7803	-15.0864	-1380.94		-565.875	-68.3485	-51.024	5.72667	0	-0.248223	0	0	-23.1213
942	Complex_1	-9.09495e-13	7.27596e-12	-1.81899e-12	0	0	0	0	4.54747e-13		-1.13687e-13	0	0	0	0	0	0	0	0		0	-68.3558	-51.0173	5.72442	0	-0.248217	0	0	-23.1307		0.315945	-7041.83	-8389.74	4018.55	-128.658	-552.126	-25.5653	-11.3581	-1345.76		-607.171	-68.3558	-51.0173	5.72442	0	-0.248217	0	0	-23.1307
943	Complex_1	-27.5691	1.99733	1.48401	-2.32632	-4.71375	-0.847664	0	6.7961		-29.9588	2.49977	2.65135	1.48401	0	0.00380409	0	0	-2.09033		0.450927	-68.3617	-51.0286	5.72804	0	-0.248216	0	0	-23.1321		0.319168	-6985.57	-8374.61	4072.07	-128.795	-557.098	-25.8185	-15.3915	-1346.52		-609.416	-68.3617	-51.0286	5.72804	0	-0.248216	0	0	-23.1321
944	Complex_1	-24.6436	4.19756	4.56389	-3.88401	-4.27376	-0.642642	0	4.54672		-29.1514	6.12764	2.07566	4.56389	0	-0.00117274	0	0	-1.8341		1.32336	-68.374	-51.0282	5.72833	0	-0.248213	0	0	-23.1445		0.318567	-6997.39	-8354.88	4021	-127.826	-561.674	-27.2974	-9.2841	-1410.5		-526.933	-68.374	-51.0282	5.72833	0	-0.248213	0	0	-23.1445
945	Complex_1	-24.7301	10.9349	0.678436	-3.37719	-3.39109	-0.0184417	0	-7.08752		-22.4692	1.42412	1.3678	0.678436	0	-0.00363503	0	0	-1.22249		0.604013	-68.2558	-51.0256	5.72754	0	-0.248197	0	0	-23.0276		0.318115	-6942.12	-8335.88	4043.96	-128.646	-558.961	-24.3756	-10.3347	-1386.47		-541.415	-68.2558	-51.0256	5.72754	0	-0.248197	0	0	-23.0276
946	Complex_1	-25.4771	5.70495	3.48016	-2.68397	-4.8009	-0.894761	0	2.98879		-29.2713	4.82792	1.93634	3.48016	0	0.00661283	0	0	-1.47053		0.875349	-68.3846	-51.0241	5.73209	0	-0.248094	0	0	-23.1583		0.313784	-6987.22	-8343.18	4073.43	-125.822	-562.216	-27.546	-8.30359	-1383.31		-610.27	-68.3846	-51.0241	5.73209	0	-0.248094	0	0	-23.1583
947	Complex_1	-20.3621	6.78854	2.32652	-2.73091	-3.81438	-0.258538	0	-1.23144		-21.4419	2.52802	-1.3605	2.32652	0	-0.0066222	0	0	0.649922		0.9187	-68.3285	-51.029	5.72833	0	-0.248222	0	0	-23.0982		0.318619	-7017.87	-8360.29	4012.43	-130.834	-555.264	-24.7064	-8.78099	-1381.51		-568.918	-68.3285	-51.029	5.72833	0	-0.248222	0	0	-23.0982
948	Complex_1	-23.3547	5.51541	2.61462	-2.87652	-3.76186	-0.0916314	0	0.404849		-25.1596	2.92728	-0.48682	2.61462	0	-0.00496597	0	0	-0.139846		0.944288	-68.2516	-51.0332	5.73145	0	-0.248216	0	0	-23.0212		0.319539	-7007.01	-8352.07	4095.85	-133.298	-562.336	-23.8445	-15.5088	-1393.71		-622.099	-68.2516	-51.0332	5.73145	0	-0.248216	0	0	-23.0212
949	Complex_1	-23.1952	3.70974	1.14774	-4.03201	-3.31919	-0.0296457	0	0.521836		-21.1937	2.06387	1.43248	1.14774	0	-0.00530294	0	0	-1.26365		0.752604	-68.3965	-51.0245	5.7278	0	-0.248194	0	0	-23.1693		0.31775	-7001.67	-8384.01	4094.05	-132.672	-564.315	-24.2065	-19.0169	-1388.18		-583.321	-68.3965	-51.0245	5.7278	0	-0.248194	0	0	-23.1693
950	Complex_1	-24.0786	2.76805	2.54617	-2.68608	-3.75217	-0.476427	0	2.91611		-25.3943	2.71212	-0.0904525	2.54617	0	0.0132729	0	0	-0.37116		0.614287	-68.3605	-51.0302	5.72998	0	-0.248187	0	0	-23.1296		0.317551	-7068.23	-8330.25	4040.42	-128.19	-560.114	-27.2651	-16.4971	-1415.83		-630.514	-68.3605	-51.0302	5.72998	0	-0.248187	0	0	-23.1296
951	Complex_1	-24.2602	8.53172	1.77943	-2.76083	-3.72173	-0.369177	0	-2.1331		-25.5865	1.81012	-0.198992	1.77943	0	0.0102618	0	0	-0.249602		0.469016	-68.2807	-51.0303	5.72644	0	-0.248227	0	0	-23.0498		0.321208	-7035.32	-8379.75	4074.05	-127.723	-556.231	-25.1393	-8.20073	-1396.45		-615.881	-68.2807	-51.0303	5.72644	0	-0.248227	0	0	-23.0498
952	Complex_1	-23.0367	4.7078	2.70956	-2.16682	-4.03944	-0.626343	0	2.82254		-26.444	3.0312	-0.0463405	2.70956	0	-0.00490833	0	0	-0.520628		0.893512	-68.1918	-51.0292	5.72908	0	-0.248264	0	0	-22.9628		0.319377	-7095.09	-8349.37	4037.42	-127.38	-578.403	-24.8867	-12.276	-1406.05		-634.139	-68.1918	-51.0292	5.72908	0	-0.248264	0	0	-22.9628
953	Complex_1	-17.9973	9.25735	2.85428	-2.00873	-4.41219	-0.0595778	0	2.20224		-25.8307	3.98565	0.0279318	2.85428	0	-0.0098658	0	0	-0.617412		1.73072	-68.2778	-51.0308	5.72955	0	-0.248203	0	0	-23.0472		0.318806	-7054.24	-8315.76	4014.92	-125.901	-566.521	-26.6481	-13.5728	-1403.36		-617.39	-68.2778	-51.0308	5.72955	0	-0.248203	0	0	-23.0472
954	Complex_1	-24.9179	6.20972	0.859284	-2.41685	-3.56379	-0.0659777	0	-0.720798		-25.2195	0.9891	-0.549898	0.859284	0	-0.00331019	0	0	0.0772417		0.605783	-68.2747	-51.0311	5.72819	0	-0.248231	0	0	-23.0439		0.32034	-7002.36	-8341.92	4053.88	-126.322	-549.603	-22.0209	-11.462	-1421.76		-583.153	-68.2747	-51.0311	5.72819	0	-0.248231	0	0	-23.0439
955	Complex_1	-21.444	8.0746	1.26929	-3.36176	-3.57587	-0.00425346	0	0.179918		-24.0259	2.28902	1.68706	1.26929	0	-0.00684266	0	0	-1.4063		0.745805	-68.278	-51.0213	5.72859	0	-0.24818	0	0	-23.0517		0.314607	-6983.61	-8312.63	4081.77	-128.405	-558.826	-22.7289	-11.1142	-1420.18		-611.497	-68.278	-51.0213	5.72859	0	-0.24818	0	0	-23.0517
956	Complex_1	-23.7134	4.17849	1.05511	-2.53067	-3.50215	-0.0583226	0	0.780215		-23.6361	1.11501	0.0394809	1.05511	0	-0.00341655	0	0	-0.358377		0.382216	-68.3465	-51.0237	5.73315	0	-0.248121	0	0	-23.12		0.312119	-7074.49	-8294.35	4019.08	-124.061	-559.61	-25.6515	-18.2073	-1421.53		-650.158	-68.3465	-51.0237	5.73315	0	-0.248121	0	0	-23.12
957	Complex_1	-24.2832	6.74384	2.81402	-2.63038	-4.33966	-0.184415	0	1.88112		-28.5677	3.83262	2.03656	2.81402	0	0.00114927	0	0	-1.76646		0.74734	-68.2707	-51.0304	5.73139	0	-0.248198	0	0	-23.0405		0.316944	-6949.68	-8318.68	4124.64	-128.067	-564.634	-24.7774	-11.8663	-1411.7		-614.588	-68.2707	-51.0304	5.73139	0	-0.248198	0	0	-23.0405
958	Complex_1	-27.1316	7.69475	2.24642	-3.24797	-4.61596	-0.370849	0	-3.07165		-25.7663	3.32646	2.01571	2.24642	0	0.0102373	0	0	-1.64796		0.702052	-68.3467	-51.0293	5.7304	0	-0.24821	0	0	-23.1184		0.318846	-6970.61	-8318.97	4048.32	-127.617	-561.433	-23.4323	-13.6095	-1411.91		-561.956	-68.3467	-51.0293	5.7304	0	-0.24821	0	0	-23.1184
959	Complex_1	-1.09139e-11	-9.09495e-12	-4.54747e-13	0	0	0	0	3.18323e-12		6.82121e-13	0	0	0	0	0	0	0	0		0	-68.2212	-51.0346	5.72857	0	-0.248217	0	0	-22.9878		0.320868	-6970.72	-8308.21	4059.28	-124.038	-555.478	-22.3058	-10.1708	-1423.58		-586.226	-68.2212	-51.0346	5.72857	0	-0.248217	0	0	-22.9878
960	Complex_1	-25.4647	4.18281	3.78026	-3.1123	-4.5363	-0.933975	0	2.71332		-27.5585	4.95504	1.78837	3.78026	0	0.0040118	0	0	-1.72539		1.10779	-68.3539	-51.0308	5.72993	0	-0.248181	0	0	-23.1236		0.318708	-6975.87	-8308.93	4056.4	-128.625	-561.011	-25.8565	-12.2646	-1404.37		-591.21	-68.3539	-51.0308	5.72993	0	-0.248181	0	0	-23.1236
961	Complex_1	-23.047	0.497099	2.29082	-3.56047	-4.41239	-1.0779	0	5.78406		-22.5682	3.56646	0.76377	2.29082	0	0.0150086	0	0	-0.81994		1.3168	-68.1754	-51.0337	5.73207	0	-0.248145	0	0	-22.944		0.318486	-6889.61	-8297.89	4132.77	-129.674	-560.86	-24.6989	-11.4331	-1414.4		-583.423	-68.1754	-51.0337	5.73207	0	-0.248145	0	0	-22.944
962	Complex_1	-30.7567	3.4586	1.71083	-3.92044	-4.12987	-0.194467	0	0.508791		-28.1902	2.63378	1.83425	1.71083	0	0.00242224	0	0	-1.70543		0.7917	-68.3053	-51.0256	5.72686	0	-0.248169	0	0	-23.0772		0.318816	-6910.45	-8322.97	4070.53	-132.909	-553.146	-24.7807	-11.9046	-1406.74		-528.525	-68.3053	-51.0256	5.72686	0	-0.248169	0	0	-23.0772
963	Complex_1	-28.9306	3.09978	1.29413	-3.94879	-4.31948	-0.976195	0	2.70493		-26.7849	2.04692	2.37957	1.29413	0	0.00594574	0	0	-1.95573		0.323009	-68.3632	-51.0316	5.72991	0	-0.2482	0	0	-23.1328		0.319466	-6936.34	-8380.17	4059.29	-130.856	-562.089	-27.446	-15.3624	-1366.16		-513.556	-68.3632	-51.0316	5.72991	0	-0.2482	0	0	-23.1328
964	Complex_1	-31.4101	-0.182468	1.55389	-3.87274	-4.68605	-0.379567	0	6.44468		-30.2879	2.04112	-0.21509	1.55389	0	0.00377628	0	0	0.0219106		0.67663	-68.2377	-50.1739	5.75472	0	-0.248204	0	0	-23.844		0.273666	-6950.82	-8351.85	4064.65	-130.694	-553.147	-26.6822	-11.2275	-1376.73		-565.148	-68.2377	-50.1739	5.75472	0	-0.248204	0	0	-23.844
965	Complex_1	-27.7259	3.89088	1.21205	-3.39602	-5.10549	-0.0211202	0	3.2673		-27.5735	1.59069	-0.575041	1.21205	0	0.00322696	0	0	0.087842		0.862614	-68.3224	-51.0277	5.72876	0	-0.248227	0	0	-23.093		0.317782	-6951.35	-8337.06	4055.06	-129.333	-554.518	-19.8779	-10.3047	-1392.72		-562.605	-68.3224	-51.0277	5.72876	0	-0.248227	0	0	-23.093
966	Complex_1	-25.4285	0.357998	0.23687	-4.32126	-3.742	-0.017557	0	2.24217		-20.1847	1.62064	1.30472	0.23687	0	-0.00435095	0	0	-0.701973		0.785371	-68.289	-51.0324	5.72935	0	-0.248222	0	0	-23.0576		0.319827	-6961.88	-8317.15	4065.94	-125.967	-550.297	-25.19	-8.38687	-1407.29		-593.532	-68.289	-51.0324	5.72935	0	-0.248222	0	0	-23.0576
967	Complex_1	-22.6111	2.54361	1.29	-3.938	-4.00015	-0.00587705	0	4.40107		-22.9018	2.03391	0.389368	1.29	0	0.00167574	0	0	-0.538272		0.891144	-68.342	-51.0274	5.72847	0	-0.248224	0	0	-23.1127		0.317847	-6959.66	-8334.25	4081.25	-129.413	-558.665	-28.9442	-8.82378	-1404.31		-576.51	-68.342	-51.0274	5.72847	0	-0.248224	0	0	-23.1127
968	Complex_1	-26.5537	0.894087	0.664563	-3.58431	-4.17731	-0.0723063	0	2.60445		-22.8828	1.12591	-0.194716	0.664563	0	-0.000172634	0	0	0.130725		0.525509	-68.2252	-51.0319	5.73129	0	-0.248162	0	0	-22.9944		0.317969	-7012.97	-8335.86	4036.57	-125.453	-558.654	-27.6949	-8.24126	-1414.24		-579.409	-68.2252	-51.0319	5.73129	0	-0.248162	0	0	-22.9944
969	Complex_1	-26.0038	3.93965	1.47713	-3.70993	-4.09256	-0.137799	0	1.44399		-24.9243	1.33149	0.287287	1.47713	0	0.0111892	0	0	-0.633247		0.189138	-68.1761	-51.0296	5.72689	0	-0.248205	0	0	-22.9456		0.320436	-7047.76	-8353.09	4013.22	-127.255	-566.705	-24.7946	-19.0564	-1380.05		-590.034	-68.1761	-51.0296	5.72689	0	-0.248205	0	0	-22.9456
970	Complex_1	-24.1371	3.95776	1.03319	-3.87729	-3.64514	-0.144414	0	0.910447		-22.3717	1.2793	-0.91588	1.03319	0	-5.54807e-05	0	0	0.398654		0.763392	-68.2431	-51.0354	5.72713	0	-0.248241	0	0	-23.0104		0.323788	-6946.13	-8313.46	4083.51	-126.359	-550.144	-24.973	-9.11376	-1407.17		-598.42	-68.2431	-51.0354	5.72713	0	-0.248241	0	0	-23.0104
971	Complex_1	-24.1941	1.08485	1.00055	-3.60817	-4.06023	-0.0207918	0	4.21517		-22.8054	1.64541	0.330936	1.00055	0	0.00653787	0	0	-0.489118		0.796512	-68.3055	-51.0246	5.726	0	-0.248204	0	0	-23.078		0.319331	-7044.28	-8339.47	4004.51	-129.337	-557.193	-28.6079	-4.07569	-1413.69		-576.413	-68.3055	-51.0246	5.726	0	-0.248204	0	0	-23.078
972	Complex_1	-26.5175	3.46645	0.83624	-3.64933	-3.45204	-0.0147811	0	-0.724578		-22.9795	0.824053	0.128993	0.83624	0	-0.00198688	0	0	-0.408214		0.26902	-68.2511	-51.0296	5.72863	0	-0.24817	0	0	-23.0204		0.318405	-7055.17	-8303.9	3989.52	-127.113	-559.143	-29.4297	-11.2999	-1411.58		-602.219	-68.2511	-51.0296	5.72863	0	-0.24817	0	0	-23.0204
973	Complex_1	-27.079	-1.29682	0.611868	-3.84888	-4.32602	-0.0973251	0	5.12528		-23.2471	1.22893	1.37318	0.611868	0	9.49028e-05	0	0	-1.03167		0.275459	-68.2763	-51.0331	5.73212	0	-0.248159	0	0	-23.0451		0.317881	-6876.81	-8343.85	4104.5	-127.089	-559.293	-31.1942	-8.46074	-1383.28		-528.152	-68.2763	-51.0331	5.73212	0	-0.248159	0	0	-23.0451
974	Complex_1	-26.9565	1.16234	1.48571	-3.86693	-3.88574	-0.0260544	0	2.28793		-24.1138	1.62957	-0.632626	1.48571	0	-0.00661626	0	0	-0.0869273		0.87002	-68.1899	-51.032	5.73063	0	-0.248191	0	0	-22.959		0.318703	-7064.92	-8304.51	3996.47	-127.896	-560.395	-28.3258	-4.14282	-1383.84		-652.28	-68.1899	-51.032	5.73063	0	-0.248191	0	0	-22.959
975	Complex_1	-30.4282	-2.8085	0.672537	-4.10386	-4.58272	-0.315828	0	5.65893		-24.9487	1.68808	1.35192	0.672537	0	-0.00218651	0	0	-1.02603		0.691841	-68.24	-51.0301	5.72816	0	-0.248208	0	0	-23.0095		0.319622	-7063.52	-8353.54	3996.77	-127.459	-556.187	-24.6707	-18.9812	-1357.34		-622.106	-68.24	-51.0301	5.72816	0	-0.248208	0	0	-23.0095
976	Complex_1	-21.1361	-2.45007	1.61001	-2.7516	-4.18336	-0.406519	0	8.77349		-21.728	2.28019	-0.523194	1.61001	0	-0.00255042	0	0	-0.0786273		1.27456	-68.256	-51.0354	5.73058	0	-0.24823	0	0	-23.0235		0.320526	-7034.66	-8339.07	4021.1	-125.666	-553.485	-27.6427	-10.8254	-1401.22		-597.849	-68.256	-51.0354	5.73058	0	-0.24823	0	0	-23.0235
977	Complex_1	-24.4192	3.52412	0.952366	-2.23253	-4.46343	-0.00838133	0	4.09135		-26.2827	1.00137	-0.61107	0.952366	0	-0.00547951	0	0	-0.0741546		0.739705	-68.1335	-51.0276	5.72892	0	-0.248175	0	0	-22.9041		0.317424	-6981.53	-8310.64	4038.02	-124.037	-557.74	-29.0573	-8.9357	-1417.83		-571.302	-68.1335	-51.0276	5.72892	0	-0.248175	0	0	-22.9041
978	Complex_1	-27.2068	1.77168	0.501583	-3.97082	-3.52712	-0.0147628	0	2.97747		-24.9448	0.790349	1.42578	0.501583	0	-0.00320336	0	0	-1.11082		-0.0229909	-68.1752	-51.029	5.72718	0	-0.248196	0	0	-22.9445		0.319355	-7054.67	-8400.94	4003.64	-128.96	-554.94	-27.4219	-13.1162	-1364.81		-568.129	-68.1752	-51.029	5.72718	0	-0.248196	0	0	-22.9445
979	Complex_1	-28.4429	1.16357	0.927993	-4.15142	-4.1915	-0.160516	0	3.86747		-25.8985	1.62023	0.764571	0.927993	0	-0.00385676	0	0	-0.724241		0.65576	-68.3227	-51.024	5.72707	0	-0.24823	0	0	-23.096		0.318434	-7039.73	-8334.69	4009.17	-123.408	-559.792	-23.3638	-12.0757	-1383.6		-611.965	-68.3227	-51.024	5.72707	0	-0.24823	0	0	-23.096
980	Complex_1	-27.3263	-2.78166	0.941645	-3.81734	-4.51834	-0.0568244	0	7.54216		-24.636	1.41857	-0.856701	0.941645	0	-0.00610737	0	0	-0.00731629		1.34704	-68.1428	-51.0341	5.72903	0	-0.248212	0	0	-22.9096		0.320007	-7038.73	-8313.06	4053.14	-119.772	-565.142	-26.467	-8.78708	-1397.98		-660.658	-68.1428	-51.0341	5.72903	0	-0.248212	0	0	-22.9096
981	Complex_1	9.09495e-13	1.81899e-12	1.36424e-12	0	0	0	0	4.54747e-13		4.54747e-13	0	0	0	0	0	0	0	0		0	-68.3465	-51.0279	5.72908	0	-0.248197	0	0	-23.1167		0.317195	-6986.79	-8292.02	4095.1	-120.615	-555.804	-22.7544	-11.2646	-1430.43		-649	-68.3465	-51.0279	5.72908	0	-0.248197	0	0	-23.1167
982	Complex_1	1.09139e-11	3.63798e-12	2.27374e-12	0	0	0	0	2.27374e-12		-3.41061e-13	0	0	0	0	0	0	0	0		0	-68.1192	-50.1744	5.75182	0	-0.248256	0	0	-23.7249		0.276662	-6956.52	-8345.95	4051	-119.049	-545.437	-22.1215	-6.19812	-1401.64		-567.127	-68.1192	-50.1744	5.75182	0	-0.248256	0	0	-23.7249
983	Complex_1	-1.81899e-12	3.63798e-12	-1.36424e-12	0	0	0	0	-2.27374e-13		0	0	0	0	0	0	0	0	0		0	-68.0676	-50.1828	5.75319	0	-0.248294	0	0	-23.6679		0.278154	-6998.68	-8336.14	4032.2	-122.787	-541.773	-21.7274	-8.81151	-1422.98		-576.661	-68.0676	-50.1828	5.75319	0	-0.248294	0	0	-23.6679
984	Complex_1	-19.5676	6.84504	1.95325	-2.90239	-3.28576	-0.292769	0	4.26035		-26.1454	2.15386	-0.333312	1.95325	0	-0.00273054	0	0	0.0169381		0.51971	-68.2227	-51.0328	5.72622	0	-0.248253	0	0	-22.9909		0.323107	-6945.86	-8304.02	4101.87	-123.004	-551.446	-24.2132	-9.97572	-1386.87		-648.199	-68.2227	-51.0328	5.72622	0	-0.248253	0	0	-22.9909
985	Complex_1	-25.1157	1.49443	0.934938	-3.89923	-4.07694	-0.227164	0	3.78772		-23.1295	1.20184	0.508169	0.934938	0	0.0105252	0	0	-0.47239		0.220596	-68.2815	-51.0302	5.72827	0	-0.248205	0	0	-23.0506		0.3192	-7069.85	-8329.8	4010.79	-125.088	-555.65	-26.8908	-14.0651	-1403.76		-625.388	-68.2815	-51.0302	5.72827	0	-0.248205	0	0	-23.0506
986	Complex_1	-25.8428	1.30666	0.775151	-3.83654	-3.72277	-0.0123285	0	3.16329		-23.5163	1.38581	0.695472	0.775151	0	-0.00411548	0	0	-0.844175		0.763474	-68.2397	-51.0339	5.73101	0	-0.248154	0	0	-23.0085		0.31989	-6994.99	-8290.88	4003.56	-121.525	-547.726	-23.7492	-10.464	-1425.58		-578.626	-68.2397	-51.0339	5.73101	0	-0.248154	0	0	-23.0085
987	Complex_1	-25.4338	0.192712	1.28123	-3.83906	-3.51935	-0.011721	0	3.36237		-22.9	2.13535	-0.438345	1.28123	0	-0.00639864	0	0	-0.0776492		1.37651	-68.3122	-51.0282	5.72836	0	-0.24821	0	0	-23.0824		0.31831	-6976.44	-8324.04	4097.85	-125.378	-551.105	-22.7827	-9.61325	-1380		-661.365	-68.3122	-51.0282	5.72836	0	-0.24821	0	0	-23.0824
988	Complex_1	-23.7349	10.0832	3.58487	-3.51136	-4.12816	-0.86718	0	0.332674		-29.2289	4.33132	0.79284	3.58487	0	0.00587239	0	0	-0.735387		0.683127	-68.1889	-51.0322	5.7273	0	-0.248244	0	0	-22.9579		0.322149	-7004.67	-8296.91	3992.51	-124.952	-555.582	-23.2428	-8.39072	-1424.14		-563.96	-68.1889	-51.0322	5.7273	0	-0.248244	0	0	-22.9579
989	Complex_1	-24.7675	4.42964	2.64038	-3.43833	-4.1793	-0.0202249	0	2.10602		-26.3057	3.32553	-0.0711368	2.64038	0	-0.00894752	0	0	-0.244066		1.0093	-68.315	-51.0265	5.72864	0	-0.248216	0	0	-23.0869		0.317961	-6987.23	-8362.65	4031.41	-131.041	-554.139	-25.3707	-8.85362	-1383.69		-552.891	-68.315	-51.0265	5.72864	0	-0.248216	0	0	-23.0869
990	Complex_1	-29.6386	2.73337	2.26292	-4.18921	-4.40287	-0.0378001	0	2.45298		-28.458	3.51261	2.05973	2.26292	0	-0.00917643	0	0	-1.73874		0.937873	-68.3893	-51.0327	5.73001	0	-0.24822	0	0	-23.1579		0.319462	-6940.27	-8418.75	4102.1	-129.876	-552.521	-26.513	-13.9346	-1365.97		-534.803	-68.3893	-51.0327	5.73001	0	-0.24822	0	0	-23.1579
991	Complex_1	-31.4314	5.25283	2.50948	-4.21178	-4.31066	-0.00821895	0	-1.7492		-28.9138	3.32047	1.89496	2.50948	0	-0.00278561	0	0	-1.93211		0.850922	-68.327	-51.0319	5.72648	0	-0.248248	0	0	-23.0949		0.321557	-6990.15	-8338.28	4058.21	-130.277	-547.655	-21.709	-10.2302	-1382.55		-617.656	-68.327	-51.0319	5.72648	0	-0.248248	0	0	-23.0949
992	Complex_1	-26.3876	4.34575	0.958165	-3.76803	-3.44259	-0.0765967	0	0.888602		-25.2928	1.14873	-0.178057	0.958165	0	0.000244943	0	0	-0.125663		0.494041	-68.3975	-51.03	5.72833	0	-0.248205	0	0	-23.1669		0.319284	-7108.82	-8378.79	3965.48	-128.361	-554.765	-25.2771	-10.4536	-1368.75		-607.9	-68.3975	-51.03	5.72833	0	-0.248205	0	0	-23.1669
993	Complex_1	-29.2035	3.47428	1.30778	-3.86312	-3.86095	-0.0111852	0	1.6901		-27.9404	2.10175	2.07466	1.30778	0	-0.00293891	0	0	-1.80945		0.531699	-68.3278	-51.0251	5.72658	0	-0.248208	0	0	-23.1006		0.319547	-7001.39	-8340.84	4004.56	-124.992	-545.567	-24.7938	-12.0588	-1383.73		-573.968	-68.3278	-51.0251	5.72658	0	-0.248208	0	0	-23.1006
994	Complex_1	-31.2121	6.59721	1.79761	-3.70601	-4.35883	-0.5279	0	-0.204685		-30.8095	2.65831	2.09469	1.79761	0	-0.000986924	0	0	-1.8614		0.628402	-68.1939	-51.0355	5.7333	0	-0.248164	0	0	-22.9621		0.318563	-7016.09	-8363.69	4081.94	-130.624	-556.976	-23.1024	-12.2049	-1393.84		-617.592	-68.1939	-51.0355	5.7333	0	-0.248164	0	0	-22.9621
995	Complex_1	-25.8019	5.67085	4.07115	-2.74047	-4.92293	-1.06749	0	2.32034		-29.1334	5.32272	1.89845	4.07115	0	0.0149381	0	0	-1.59214		0.930311	-68.2703	-51.0236	5.72628	0	-0.248212	0	0	-23.0423		0.317486	-6992.96	-8333.81	4012.64	-124.829	-541.648	-27.6069	-13.3115	-1405.18		-559.209	-68.2703	-51.0236	5.72628	0	-0.248212	0	0	-23.0423
996	Complex_1	-25.8524	5.47229	0.481073	-3.68796	-3.82587	-0.0493965	0	-1.92238		-22.3202	1.53664	2.19877	0.481073	0	-0.00513372	0	0	-1.62331		0.485242	-68.2354	-51.0267	5.72676	0	-0.248206	0	0	-23.0069		0.319593	-6887.66	-8355.93	4050.1	-130.209	-555.648	-26.3155	-10.1603	-1404.73		-454.781	-68.2354	-51.0267	5.72676	0	-0.248206	0	0	-23.0069
997	Complex_1	-30.5764	5.73946	1.57386	-3.37148	-4.84696	-0.0608596	0	0.789485		-30.3999	2.21953	1.98	1.57386	0	-0.00522429	0	0	-1.83975		0.510649	-68.2686	-51.0295	5.72782	0	-0.248201	0	0	-23.0383		0.31956	-6924.25	-8355.72	4073.57	-126.286	-552.36	-25.9925	-12.6483	-1364.61		-560.203	-68.2686	-51.0295	5.72782	0	-0.248201	0	0	-23.0383
998	Complex_1	-32.9438	4.04026	1.62294	-3.80102	-4.56907	-0.17273	0	1.21217		-31.2764	2.2564	2.10582	1.62294	0	-0.00127015	0	0	-1.8314		0.360312	-68.3251	-51.0279	5.72581	0	-0.248205	0	0	-23.0955		0.320708	-6857.38	-8319.21	4156.48	-125.837	-548.314	-26.0988	-9.87729	-1380.09		-604.438	-68.3251	-51.0279	5.72581	0	-0.248205	0	0	-23.0955
999	Complex_1	-31.586	1.62811	1.33564	-3.884	-4.99465	-0.0244389	0	2.86526		-28.5119	2.01051	1.99017	1.33564	0	-0.00849583	0	0	-1.88313		0.576322	-68.2834	-51.0329	5.72899	0	-0.248192	0	0	-23.051		0.31963	-6967.15	-8342.2	4034.57	-126.586	-554.985	-24.9355	-7.39061	-1375.34		-570.287	-68.2834	-51.0329	5.72899	0	-0.248192	0	0	-23.051
1000	Complex_1	-23.2309	0.78943	2.07194	-3.31251	-4.09389	-0.178341	0	3.18905		-21.6965	2.3017	-0.233342	2.07194	0	-0.00442416	0	0	-0.313031		0.780557	-68.3119	-51.0296	5.72822	0	-0.248237	0	0	-23.0822		0.319889	-6960.41	-8314.82	4050.33	-125.5	-549.362	-25.6995	-7.55975	-1408.03		-579.776	-68.3119	-51.0296	5.72822	0	-0.248237	0	0	-23.0822
0	Complex_2	-23.2016	-24.4515	2.16547	-4.41982	-4.7076	0	0	27.2327		-19.021	-0.653762	-2.90835	2.16547	0	-0.00680335	0	0	1.14469		-1.04876	40.537	61.8046	2.46633	0	-0.104948	0	0	-33.1247		9.49577	-6913.9	-8311.33	4102.76	-134.794	-564.239	-23.6077	-35.5214	-1365.66		-581.51	40.537	61.8046	2.46633	0	-0.104948	0	0	-33.1247
1	Complex_2	-16.9582	-1.23973	0.167404	-3.12446	-5.15511	0	0	11.1972		-18.8035	1.49575	0.833139	0.167404	0	0	0	0	0.178833		0.316377	37.6008	50.7442	6.22182	0	-0.13	0	0	-30.0512		10.816	-6984.47	-8312.59	4004.64	-129.702	-571.166	-21.955	-16.8807	-1356.8		-580.011	37.6008	50.7442	6.22182	0	-0.13	0	0	-30.0512
2	Complex_2	-19.1571	-11.3769	2.70735	-4.71423	-6.17624	0	0	19.0291		-18.6262	3.16871	3.06258	2.70735	0	-0.00808027	0	0	-2.18976		-0.403379	35.9325	55.4452	3.39064	0	-0.110507	0	0	-31.9867		9.19383	-6950.7	-8268.11	4007.07	-127.922	-566.843	-27.4191	-21.7078	-1350.71		-595.06	35.9325	55.4452	3.39064	0	-0.110507	0	0	-31.9867
3	Complex_2	-18.295	-16.3944	-0.322127	-4.77834	-5.47548	0	0	23.9766		-15.3012	1.47347	2.251	-0.322127	0	0.000628839	0	0	-0.55175		0.095711	36.5456	57.457	3.43732	0	-0.110542	0	0	-33.3242		9.08594	-6929.32	-8285.33	4102.04	-130.466	-555.812	-24.4819	-27.7783	-1375.29		-632.204	36.5456	57.457	3.43732	0	-0.110542	0	0	-33.3242
4	Complex_2	-19.4084	-17.72	-0.298052	-4.80081	-4.72228	0	0	25.2812		-17.1485	1.43842	3.35514	-0.298052	0	-0.00276054	0	0	-0.94068		-0.675236	38.1374	56.6624	2.21383	0	-0.104947	0	0	-30.3778		9.74392	-6949.23	-8235.99	4086.7	-130.633	-559.908	-25.8013	-19.9873	-1387.04		-676.573	38.1374	56.6624	2.21383	0	-0.104947	0	0	-30.3778
5	Complex_2	-15.1298	-19.5318	1.32473	-5.34818	-5.39373	0	0	25.4958		-11.6766	2.63998	1.8057	1.32473	0	0.00220469	0	0	-1.09913		0.60647	37.9438	56.6675	2.22571	0	-0.104941	0	0	-30.5784		9.73391	-6978	-8305.14	4102.81	-131.747	-569.45	-26.274	-18.8429	-1358.31		-671.042	37.9438	56.6675	2.22571	0	-0.104941	0	0	-30.5784
6	Complex_2	-20.2109	-19.2245	1.92491	-5.06925	-5.33554	0	0	22.6444		-15.1509	1.88116	-0.028166	1.92491	0	-0.00578055	0	0	-0.482412		0.472603	36.434	57.4654	3.4337	0	-0.110526	0	0	-33.4343		9.07973	-6980.36	-8258.88	4041.6	-127.114	-565.225	-26.0845	-19.1498	-1382.22		-643.281	36.434	57.4654	3.4337	0	-0.110526	0	0	-33.4343
7	Complex_2	-18.9642	-8.54684	1.05577	-4.16627	-5.1477	0	0	11.4482		-13.6073	0.0120286	-4.07995	1.05577	0	-0.00712264	0	0	1.03369		2.00963	36.6078	57.482	3.41353	0	-0.110508	0	0	-33.2555		9.07826	-6862.72	-8233.47	4109.29	-128.733	-556.477	-25.9865	-19.992	-1407.87		-599.482	36.6078	57.482	3.41353	0	-0.110508	0	0	-33.2555
8	Complex_2	-23.1484	-12.4723	2.32886	-3.83436	-4.56749	0	0	17.6619		-22.265	0.100847	-3.62568	2.32886	0	-0.00621275	0	0	1.11237		0.291515	36.6196	57.4603	3.43946	0	-0.11054	0	0	-33.2461		9.07639	-6946.23	-8212.98	4027.31	-128.344	-551.108	-23.5461	-21.9278	-1407.54		-628.088	36.6196	57.4603	3.43946	0	-0.11054	0	0	-33.2461
9	Complex_2	-20.1114	-11.9133	0.452724	-4.19944	-5.04857	0	0	19.8017		-19.2045	0.850286	0.555611	0.452724	0	-0.00123239	0	0	0.146327		-0.303144	36.5682	57.508	3.40195	0	-0.110448	0	0	-33.3054		9.07415	-6931.49	-8222.4	4013.17	-129.632	-554.003	-24.7211	-20.257	-1396.09		-597.55	36.5682	57.508	3.40195	0	-0.110448	0	0	-33.3054
10	Complex_2	-17.4592	-4.52961	-0.376962	-4.38739	-4.77684	0	0	13.2944		-16.6828	3.32452	5.72738	-0.376962	0	0.00114867	0	0	-1.87311		-0.153939	36.0349	55.444	3.38392	0	-0.110482	0	0	-31.8855		9.20304	-6961.83	-8233.3	4021.1	-127.337	-556.471	-23.4067	-16.1439	-1392.63		-633.641	36.0349	55.444	3.38392	0	-0.110482	0	0	-31.8855
11	Complex_2	-19.2368	-4.89903	-0.0708178	-4.45249	-5.1957	0	0	13.5438		-18.1626	2.01	3.51999	-0.0708178	0	-0.00115379	0	0	-1.80252		0.364498	36.0145	55.4196	3.40253	0	-0.110577	0	0	-31.8961		9.19901	-6982.92	-8205.23	4001.95	-132.44	-563.112	-25.0335	-13.9825	-1455.84		-589.231	36.0145	55.4196	3.40253	0	-0.110577	0	0	-31.8961
12	Complex_2	-19.8783	-8.67977	0.361863	-4.55578	-4.86347	0	0	16.5411		-18.6823	3.66987	4.40354	0.361863	0	0.000204885	0	0	-0.859575		-0.236168	36.4785	55.1745	1.79048	0	-0.104582	0	0	-30.3011		9.91915	-7050.3	-8177.84	3954.25	-128.748	-557.127	-23.1006	-20.6498	-1467.32		-629.77	36.4785	55.1745	1.79048	0	-0.104582	0	0	-30.3011
13	Complex_2	-23.8848	-17.955	0.588125	-5.56348	-5.3602	0	0	22.8088		-18.403	2.78572	3.14457	0.588125	0	0.00264233	0	0	-1.51486		0.565248	37.2714	55.2695	2.24756	0	-0.104802	0	0	-30.0089		9.86815	-7009.52	-8204.03	4000.18	-128.452	-564.027	-21.6818	-11.167	-1466.63		-613.71	37.2714	55.2695	2.24756	0	-0.104802	0	0	-30.0089
14	Complex_2	-22.0022	-19.4929	0.266256	-4.47529	-4.37771	0	0	24.1517		-18.0743	-0.787297	-0.681152	0.266256	0	-0.00194326	0	0	-0.204336		-0.166122	40.4277	61.0412	3.04695	0	-0.105305	0	0	-32.3		8.74483	-6997.43	-8138.33	4033.09	-125.652	-560.362	-23.3577	-19.2598	-1460.18		-703.38	40.4277	61.0412	3.04695	0	-0.105305	0	0	-32.3
15	Complex_2	-21.1769	-10.6609	0.656772	-4.43418	-4.32127	0	0	17.4731		-19.8905	0.639304	0.70178	0.656772	0	-0.00191184	0	0	-0.58474		-0.132595	36.6882	57.4974	3.4062	0	-0.110498	0	0	-33.186		9.08106	-6934.74	-8114.57	4009.35	-123.253	-557.151	-22.5394	-23.3466	-1487.38		-615.848	36.6882	57.4974	3.4062	0	-0.110498	0	0	-33.186
16	Complex_2	-23.0382	-14.6429	1.16917	-2.21686	-4.61445	0	0	17.8801		-20.6132	3.15311	3.11273	1.16917	0	0.00971955	0	0	-0.283364		-0.855142	36.5292	52.4732	5.69577	0	-0.13	0	0	-31.4178		9.90799	-7025.25	-8130.57	4038.31	-120.126	-556.638	-19.6958	-21.8481	-1501.52		-713.157	36.5292	52.4732	5.69577	0	-0.13	0	0	-31.4178
17	Complex_2	0.12825	5.78067	0.000319978	0	0	0	0	-5.65248		-0.000260896	0.0157212	-0.000654596	0.000319978	0	0	0	0	0.0161996		-0.000143761	36.4103	52.4757	5.68839	0	-0.13	0	0	-31.5367		9.91291	-6898.33	-8187.41	4094.4	-119.518	-546.74	-21.5599	-17.1569	-1484.94		-615.401	36.4103	52.4757	5.68839	0	-0.13	0	0	-31.5367
18	Complex_2	0.115467	5.6266	-0.000790152	0	1.97724e-06	0	0	-5.50848		-0.0018646	1.48005e-05	0.00201843	-0.000790152	0	1.97724e-06	0	0	0.000410906		-0.00162637	35.0398	58.4464	1.15159	0	-0.115681	0	0	-32.2299		7.78735	-6849.67	-8142.23	4111.88	-121.693	-556.816	-20.0578	-14.111	-1462.45		-644.199	35.0398	58.4464	1.15159	0	-0.115681	0	0	-32.2299
19	Complex_2	0.187241	5.72099	0.0177409	0	-8.41965e-05	0	0	-5.55812		0.00670929	0.0776068	-0.0323584	0.0177409	0	-8.41965e-05	0	0	0.0854039		0.00690453	35.9795	55.457	3.38061	0	-0.110438	0	0	-31.9418		9.19409	-6849.55	-8122.51	4111	-118.652	-543.428	-20.1624	-16.7457	-1475.29		-663.748	35.9795	55.457	3.38061	0	-0.110438	0	0	-31.9418
20	Complex_2	0.0243232	5.85222	0.00519082	0	-5.9343e-05	0	0	-5.83092		-0.00210913	-0.0893696	-0.0094416	0.00519082	0	-5.9343e-05	0	0	-0.0831311		-0.00192841	35.9718	55.4518	3.38409	0	-0.110459	0	0	-31.9519		9.19825	-6944.37	-8123.01	4083.69	-115.051	-546.375	-23.4204	-21.2917	-1513.18		-685.726	35.9718	55.4518	3.38409	0	-0.110459	0	0	-31.9519
21	Complex_2	-23.176	-12.4609	1.62535	-4.07428	-4.57472	0	0	15.9652		-19.6566	0.110455	-0.479626	1.62535	0	-0.00541093	0	0	-0.781148		-0.248715	36.0282	55.4365	3.38946	0	-0.110488	0	0	-31.8891		9.20183	-7004.86	-8165.42	4061.55	-119.819	-550.241	-22.5992	-23.7311	-1472.72		-711.883	36.0282	55.4365	3.38946	0	-0.110488	0	0	-31.8891
22	Complex_2	-23.6878	-10.1968	-0.535379	-4.39069	-5.87868	0	0	14.8192		-17.5054	0.905727	2.84962	-0.535379	0	-0.000134612	0	0	-1.36184		-0.0465399	36.0342	55.4296	3.39532	0	-0.110525	0	0	-31.8821		9.20189	-7066.18	-8231.01	3971.11	-121.064	-554.934	-23.1163	-21.8321	-1407.54		-677.801	36.0342	55.4296	3.39532	0	-0.110525	0	0	-31.8821
23	Complex_2	-13.5815	-5.43341	-0.0635166	-3.73152	-6.01754	0	0	16.6287		-14.9642	1.54744	1.48897	-0.0635166	0	0.00100125	0	0	-0.619584		0.740568	35.9872	55.4509	3.382	0	-0.11046	0	0	-31.9332		9.19796	-6944.53	-8180.92	4047.29	-116.631	-545.696	-25.721	-20.3445	-1424.06		-678.448	35.9872	55.4509	3.382	0	-0.11046	0	0	-31.9332
24	Complex_2	-18.6779	-3.65979	1.13279	-3.20806	-5.17361	0	0	10.7724		-18.5416	1.19658	-0.013021	1.13279	0	0	0	0	-0.600938		0.677744	37.5351	50.7406	6.22081	0	-0.13	0	0	-30.1206		10.8242	-6944.53	-8196.63	4092.64	-118.59	-555.476	-21.79	-22.1035	-1459.17		-663.405	37.5351	50.7406	6.22081	0	-0.13	0	0	-30.1206
25	Complex_2	-15.9413	-4.13635	3.01766	-3.84631	-4.75477	0	0	8.76705		-14.9886	2.18462	-2.34771	3.01766	0	1.54225e-05	0	0	-0.74206		2.25671	37.4491	50.748	6.21981	0	-0.13	0	0	-30.2042		10.8156	-6964.05	-8226.54	4088.91	-117.738	-551.414	-26.9557	-17.2232	-1423.13		-689.953	37.4491	50.748	6.21981	0	-0.13	0	0	-30.2042
26	Complex_2	-19.0362	-6.04167	-0.328592	-3.65855	-5.0203	0	0	15.0365		-19.0236	1.48849	2.17508	-0.328592	0	0.00112483	0	0	-0.565201		0.206083	36.0714	55.4285	3.3919	0	-0.110482	0	0	-31.8469		9.20842	-6856.23	-8218.09	4128.92	-118.265	-558.777	-22.6942	-16.4004	-1413.01		-637.915	36.0714	55.4285	3.3919	0	-0.110482	0	0	-31.8469
27	Complex_2	-0.145145	-2.84627	0.00184395	0	1.13687e-13	0	0	2.69534		0.00394919	-0.0386298	-0.00588605	0.00184395	0	0	0	0	-0.0385373		0.00394953	37.5186	50.7512	6.2184	0	-0.13	0	0	-30.1365		10.8155	-6925.21	-8219.05	4038.61	-117.121	-546.776	-23.6927	-23.4569	-1417.02		-616.705	37.5186	50.7512	6.2184	0	-0.13	0	0	-30.1365
28	Complex_2	-0.0260376	-3.31319	-0.00625987	0	1.31909e-05	0	0	3.28334		0.0100559	0.0977322	-0.0126873	-0.00625987	0	1.31909e-05	0	0	0.106609		0.0100568	36.5728	57.4604	3.43693	0	-0.110547	0	0	-33.2917		9.07766	-7006.57	-8184.51	3997.07	-115.099	-550.269	-24.7397	-18.6509	-1449.47		-660.9	36.5728	57.4604	3.43693	0	-0.110547	0	0	-33.2917
29	Complex_2	-17.7239	-6.00068	-0.707913	-3.96992	-5.37474	0	0	15.8482		-17.5188	-0.0792024	0.816609	-0.707913	0	-0.000218861	0	0	-0.69769		0.510011	37.5068	55.2629	2.24593	0	-0.104821	0	0	-29.7656		9.86847	-7006.93	-8226.01	3988.82	-123.965	-556.228	-25.9736	-24.8102	-1457.88		-580.872	37.5068	55.2629	2.24593	0	-0.104821	0	0	-29.7656
30	Complex_2	-15.5796	-10.1258	-0.39555	-4.06032	-5.81853	0	0	20.3953		-15.5747	1.86198	0.712877	-0.39555	0	-0.000820556	0	0	1.11346		0.43202	36.4724	57.4991	3.41611	0	-0.110508	0	0	-33.4047		9.07239	-6907	-8200.33	4019.91	-124.471	-546.063	-24.0713	-18.9702	-1410.91		-602.095	36.4724	57.4991	3.41611	0	-0.110508	0	0	-33.4047
31	Complex_2	-18.9951	-5.08461	-0.240475	-4.22625	-5.5948	0	0	14.3075		-18.1565	1.18766	1.16948	-0.240475	0	-0.00065712	0	0	-0.137896		0.397205	36.4523	57.4915	3.41758	0	-0.110491	0	0	-33.4226		9.07637	-7068.47	-8176.37	3965.29	-123.017	-551.44	-23.5187	-22.4373	-1462.27		-674.706	36.4523	57.4915	3.41758	0	-0.110491	0	0	-33.4226
32	Complex_2	-16.7786	-4.89412	-1.52832	-4.61784	-5.75434	0	0	16.368		-16.3519	2.5492	3.87464	-1.52832	0	0.000353994	0	0	-0.313027		0.51555	36.5348	57.4797	3.42761	0	-0.110492	0	0	-33.3366		9.07455	-7073.16	-8206.33	3991.86	-122.95	-553.78	-23.8846	-23.4168	-1415.38		-719.279	36.5348	57.4797	3.42761	0	-0.110492	0	0	-33.3366
33	Complex_2	-13.2429	-3.29873	-0.56338	-4.41794	-4.90122	0	0	13.625		-13.6866	2.2261	2.49872	-0.56338	0	0.00319786	0	0	-0.31467		0.602224	36.5604	57.4921	3.42268	0	-0.11055	0	0	-33.3196		9.07575	-7070.88	-8189.1	3953.1	-122.006	-555.758	-25.043	-23.5129	-1422.83		-685.722	36.5604	57.4921	3.42268	0	-0.11055	0	0	-33.3196
34	Complex_2	-15.4525	-4.08658	-0.870729	-4.99909	-5.22661	0	0	15.8376		-16.1071	2.25161	4.9736	-0.870729	0	0.000347423	0	0	-2.19057		0.338961	36.063	55.4632	3.38055	0	-0.110427	0	0	-31.8631		9.19272	-7015.96	-8176.94	3947.05	-124.371	-558.005	-24.09	-22.3241	-1466.63		-590.647	36.063	55.4632	3.38055	0	-0.110427	0	0	-31.8631
35	Complex_2	-27.4525	-14.8881	2.73852	-4.40891	-5.91543	0	0	16.7049		-21.6834	2.70178	0.397138	2.73852	0	-0.00441364	0	0	0.011415		-0.440879	36.008	55.4487	3.38887	0	-0.110459	0	0	-31.9132		9.19405	-7004.72	-8209.96	4050.55	-120.627	-559.984	-23.6619	-29.4892	-1415.96		-695.587	36.008	55.4487	3.38887	0	-0.110459	0	0	-31.9132
36	Complex_2	-16.7317	-6.45412	-0.638013	-4.50676	-6.17027	0	0	16.4175		-15.3801	2.68066	2.85499	-0.638013	0	-0.00315651	0	0	-0.36855		0.835383	36.5662	57.5353	3.39462	0	-0.110363	0	0	-33.3193		9.06591	-7085.79	-8208.06	4003.71	-126.452	-568.603	-25.3221	-22.9654	-1453		-685.083	36.5662	57.5353	3.39462	0	-0.110363	0	0	-33.3193
37	Complex_2	-15.6968	-9.14412	1.27763	-5.02773	-6.41655	0	0	18.4226		-14.8086	4.65868	5.68032	1.27763	0	-0.00219284	0	0	-2.37771		0.0806303	36.0716	55.4412	3.3889	0	-0.110453	0	0	-31.8492		9.20115	-7035.13	-8233.01	4000.65	-123.364	-556.15	-23.1105	-24.136	-1400.61		-675.404	36.0716	55.4412	3.3889	0	-0.110453	0	0	-31.8492
38	Complex_2	-12.993	-13.6452	0.969935	-4.84815	-5.6138	0	0	21.3602		-11.216	5.24284	3.78049	0.969935	0	-0.00173738	0	0	-0.679766		1.17392	36.6255	57.4653	3.43317	0	-0.110523	0	0	-33.2419		9.07938	-6994.68	-8211.78	3983.83	-123.898	-563.119	-25.5026	-21.5061	-1410.06		-622.639	36.6255	57.4653	3.43317	0	-0.110523	0	0	-33.2419
39	Complex_2	-21.5047	-14.6666	-0.0642022	-4.09311	-6.08658	0	0	21.047		-17.6412	-0.456404	-1.55325	-0.0642022	0	-0.00290324	0	0	0.397945		0.766011	36.7089	57.4437	3.44425	0	-0.110544	0	0	-33.1532		9.08469	-7051.89	-8186.4	4028.81	-122.81	-560.614	-26.5437	-23.0884	-1436.18		-725.075	36.7089	57.4437	3.44425	0	-0.110544	0	0	-33.1532
40	Complex_2	-20.5586	-6.02321	-0.340131	-4.43147	-5.54159	0	0	14.5362		-18.7584	0.738339	1.54738	-0.340131	0	0.0013415	0	0	-0.531787		0.0615317	36.5908	57.4472	3.45313	0	-0.110571	0	0	-33.2792		9.08025	-7097.87	-8229.46	3971.49	-121.002	-563.348	-23.9761	-21.1278	-1422.27		-688.164	36.5908	57.4472	3.45313	0	-0.110571	0	0	-33.2792
41	Complex_2	-17.2632	-10.4049	-1.15728	-4.42124	-5.76457	0	0	17.0078		-12.523	1.75193	2.74974	-1.15728	0	0.00179384	0	0	-0.685756		0.843425	36.5828	57.4863	3.42582	0	-0.110504	0	0	-33.2909		9.07209	-6936.8	-8245.54	4032.67	-121.663	-564.678	-22.4011	-19.0281	-1405.77		-590.395	36.5828	57.4863	3.42582	0	-0.110504	0	0	-33.2909
42	Complex_2	-25.5527	-21.0146	2.29807	-4.64016	-6.38141	0	0	22.4854		-18.3	3.29344	0.213265	2.29807	0	-0.00609079	0	0	0.231914		0.556283	35.8461	55.4522	3.38631	0	-0.1105	0	0	-32.0722		9.19027	-6987.58	-8217.39	4077.65	-120.904	-562.709	-27.3215	-22.4014	-1421.06		-693.45	35.8461	55.4522	3.38631	0	-0.1105	0	0	-32.0722
43	Complex_2	-20.9358	-11.8428	0.133783	-3.82655	-5.59749	0	0	19.0438		-18.8465	-0.12235	-1.07345	0.133783	0	-0.00127098	0	0	0.429637		0.388954	36.6593	57.4532	3.43278	0	-0.110561	0	0	-33.1965		9.08042	-6890.87	-8259.43	4103.74	-122.118	-552.6	-27.3104	-23.91	-1425.64		-583.598	36.6593	57.4532	3.43278	0	-0.110561	0	0	-33.1965
44	Complex_2	-16.8215	-17.4409	3.70065	-3.59928	-5.48675	0	0	23.7279		-17.7232	3.0261	-6.93799	3.70065	0	-0.0194833	0	0	2.64432		3.63861	36.669	57.4695	3.42605	0	-0.110517	0	0	-33.202		9.0859	-7009.28	-8250.96	4034.46	-121.971	-556.211	-26.7214	-25.9877	-1429.34		-632.546	36.669	57.4695	3.42605	0	-0.110517	0	0	-33.202
45	Complex_2	-24.8248	-13.9375	1.00954	-4.51548	-6.86118	0	0	18.7364		-19.2566	1.40244	0.705374	1.00954	0	-0.00204704	0	0	-1.19128		0.880854	35.9573	55.4282	3.39184	0	-0.110499	0	0	-31.9605		9.20823	-7024.27	-8185.93	4092.12	-120.49	-565.885	-25.5883	-20.2702	-1438.68		-759.55	35.9573	55.4282	3.39184	0	-0.110499	0	0	-31.9605
46	Complex_2	-23.6924	-11.3688	0.870738	-3.6875	-6.03554	0	0	17.4628		-20.9341	0.517035	0.799276	0.870738	0	-0.00122892	0	0	-1.19345		0.041703	36.1566	55.426	3.39385	0	-0.110522	0	0	-31.7562		9.2035	-7038.15	-8212.58	4001.15	-117.028	-559.431	-28.4958	-18.2232	-1415.36		-688.179	36.1566	55.426	3.39385	0	-0.110522	0	0	-31.7562
47	Complex_2	-24.6698	-14.6417	0.159309	-3.92792	-6.46416	0	0	21.6016		-21.3969	-0.14384	-0.901226	0.159309	0	0.00190221	0	0	0.177483		0.418692	36.4875	57.5052	3.40971	0	-0.110481	0	0	-33.3933		9.07629	-6932.46	-8253.05	4162.47	-123.109	-557.734	-26.489	-24.2099	-1413.47		-696.855	36.4875	57.5052	3.40971	0	-0.110481	0	0	-33.3933
48	Complex_2	-17.2032	-3.81655	0.495982	-4.16635	-5.67325	0	0	13.4844		-17.5275	1.99531	2.86009	0.495982	0	-7.14266e-05	0	0	-1.42688		0.0661903	36.0097	55.4262	3.39843	0	-0.11052	0	0	-31.9087		9.2043	-7043.09	-8265.99	4029.16	-123.765	-554.484	-27.9487	-24.2937	-1416.2		-659.562	36.0097	55.4262	3.39843	0	-0.11052	0	0	-31.9087
49	Complex_2	-17.8635	-5.77492	-0.660757	-4.06825	-5.50078	0	0	15.124		-16.9828	2.33839	2.56855	-0.660757	0	0.0012104	0	0	0.0545003		0.374883	36.6026	57.4973	3.4096	0	-0.110527	0	0	-33.2763		9.08253	-7074.73	-8247.32	4003.58	-121.687	-566.301	-23.4247	-23.8303	-1374.79		-720.957	36.6026	57.4973	3.4096	0	-0.110527	0	0	-33.2763
50	Complex_2	-17.4382	-6.43671	1.26162	-4.42342	-5.07068	0	0	12.4846		-15.2537	1.63261	0.958614	1.26162	0	-0.00457683	0	0	-0.502541		-0.0805022	36.4065	57.4455	3.44279	0	-0.110543	0	0	-33.4607		9.08945	-6965.63	-8246.06	4077.72	-125.083	-557.527	-26.7557	-27.3073	-1389.58		-671.036	36.4065	57.4455	3.44279	0	-0.110543	0	0	-33.4607
51	Complex_2	-17.042	-7.93183	0.991512	-4.82747	-5.90226	0	0	14.6569		-14.0289	2.47003	1.75162	0.991512	0	-0.00220799	0	0	-0.852286		0.581387	36.6486	57.4729	3.43331	0	-0.110462	0	0	-33.2204		9.07332	-7002.21	-8212.44	4069.32	-122.195	-561.951	-25.2808	-32.2589	-1436.03		-681.377	36.6486	57.4729	3.43331	0	-0.110462	0	0	-33.2204
52	Complex_2	-16.4549	-3.27935	0.467081	-4.28817	-5.54063	0	0	12.4475		-16.2613	1.50737	2.12598	0.467081	0	0.00013704	0	0	-1.0185		-0.0673262	36.6017	57.4887	3.41609	0	-0.110543	0	0	-33.2672		9.07468	-7086.16	-8269.65	3919.49	-126.112	-559.816	-28.167	-30.2079	-1387.68		-604.012	36.6017	57.4887	3.41609	0	-0.110543	0	0	-33.2672
53	Complex_2	-20.9433	-7.67273	0.748176	-4.5848	-5.70687	0	0	14.1459		-17.873	1.55601	1.58703	0.748176	0	-0.00290944	0	0	-1.00165		0.22536	36.6832	57.4611	3.42902	0	-0.110551	0	0	-33.1826		9.08623	-6936.66	-8241.58	4065.81	-124.589	-561.462	-25.1643	-20.4299	-1428.57		-600.664	36.6832	57.4611	3.42902	0	-0.110551	0	0	-33.1826
54	Complex_2	-17.5053	-6.22997	-1.31056	-4.8537	-5.4822	0	0	16.7547		-16.3836	1.87365	3.20062	-1.31056	0	0.000342088	0	0	-0.597315		0.580562	36.7149	57.4768	3.41904	0	-0.110557	0	0	-33.153		9.08264	-6942.14	-8218.55	4078.03	-122.5	-558.386	-24.2489	-22.051	-1427.01		-647.427	36.7149	57.4768	3.41904	0	-0.110557	0	0	-33.153
55	Complex_2	-13.3245	-0.625314	1.23226	-5.3521	-5.55983	0	0	12.37		-15.3896	6.15494	7.04736	1.23226	0	-0.00266971	0	0	-1.67781		-0.444205	36.0372	55.4229	3.40247	0	-0.110564	0	0	-31.8771		9.19939	-6989.06	-8258.24	4077.12	-128.126	-562.781	-23.9036	-17.6886	-1406.18		-669.254	36.0372	55.4229	3.40247	0	-0.110564	0	0	-31.8771
56	Complex_2	-21.1187	-12.4119	0.735898	-4.48968	-6.38117	0	0	17.5291		-16.1009	1.33313	0.908303	0.735898	0	-0.00226143	0	0	-1.01921		0.710396	36.5422	57.4579	3.43577	0	-0.110545	0	0	-33.3244		9.08354	-6939.56	-8246.4	4084.54	-128.377	-560.099	-22.9383	-16.8373	-1394.75		-654.7	36.5422	57.4579	3.43577	0	-0.110545	0	0	-33.3244
57	Complex_2	-20.1007	-9.94256	-1.21521	-5.22517	-6.03726	0	0	18.8308		-16.5113	1.97025	2.81913	-1.21521	0	0.00133637	0	0	-0.617277		0.982276	36.6202	57.4801	3.42255	0	-0.110527	0	0	-33.2551		9.08323	-6976.6	-8270.87	4020.52	-128.601	-566.288	-27.4162	-19.9801	-1412.79		-571.177	36.6202	57.4801	3.42255	0	-0.110527	0	0	-33.2551
58	Complex_2	-22.3159	-9.2147	1.50494	-5.07863	-6.30327	0	0	15.775		-18.9993	2.4084	2.75389	1.50494	0	0.00239978	0	0	-1.40021		-0.45263	36.7345	57.4853	3.41562	0	-0.110531	0	0	-33.1326		9.07676	-6941.27	-8297.54	4066.96	-128.219	-557.801	-25.7983	-13.5504	-1369.25		-616.078	36.7345	57.4853	3.41562	0	-0.110531	0	0	-33.1326
59	Complex_2	-18.7666	-15.2239	-1.18652	-5.17659	-4.8338	0	0	22.7209		-15.0666	1.80333	2.80656	-1.18652	0	0.000551125	0	0	-0.365256		0.548001	36.6685	57.4532	3.43412	0	-0.110566	0	0	-33.1927		9.08445	-7023.21	-8270.24	3991.32	-128.957	-557.148	-26.0701	-20.3921	-1384.34		-627.373	36.6685	57.4532	3.43412	0	-0.110566	0	0	-33.1927
60	Complex_2	-16.6553	-9.92736	-1.21821	-5.01205	-5.99491	0	0	19.3557		-13.8585	1.71803	0.673712	-1.21821	0	4.68109e-05	0	0	-0.0898599		2.35234	36.4262	57.4706	3.41921	0	-0.110543	0	0	-33.4384		9.08531	-6987.88	-8342.16	4087.21	-127.537	-557.903	-26.5416	-15.9521	-1356.19		-648.809	36.4262	57.4706	3.41921	0	-0.110543	0	0	-33.4384
61	Complex_2	-23.6807	-16.5665	1.54295	-4.19931	-6.2328	0	0	22.6833		-20.9083	2.36011	1.54654	1.54295	0	0.000802501	0	0	-0.951034		0.220847	38.6661	58.307	5.13077	0	-0.106075	0	0	-34.7546		10.089	-7005.68	-8290.23	4018.39	-128.347	-565.884	-23.6014	-17.9105	-1383.48		-614.62	38.6661	58.307	5.13077	0	-0.106075	0	0	-34.7546
62	Complex_2	-25.7651	-19.8866	2.37729	-4.22251	-5.95444	0	0	20.482		-18.5609	3.34414	0.0767117	2.37729	0	-0.00667507	0	0	-0.177975		1.07478	36.0477	55.4305	3.38664	0	-0.110496	0	0	-31.8673		9.20835	-7096.35	-8317.23	4012	-124.377	-564.116	-26.1248	-15.1985	-1395.47		-665.828	36.0477	55.4305	3.38664	0	-0.110496	0	0	-31.8673
63	Complex_2	-22.2368	-17.9335	1.43013	-3.56706	-5.22236	0	0	18.8821		-15.8261	1.78628	0.652381	1.43013	0	0	0	0	-0.500961		0.204723	37.5617	50.7778	6.21086	0	-0.13	0	0	-30.09		10.7931	-6876.34	-8250.94	4088.72	-125.595	-553.654	-26.1912	-18.9949	-1359.1		-630.579	37.5617	50.7778	6.21086	0	-0.13	0	0	-30.09
64	Complex_2	-22.4619	-17.7149	0.0292806	-4.42931	-6.14767	0	0	20.8192		-15.0185	2.96521	0.95911	0.0292806	0	0.00294522	0	0	0.298205		1.67567	35.0185	55.6572	2.95523	0	-0.110087	0	0	-32.7301		9.24619	-6943.04	-8272.11	4016.48	-129.031	-570.156	-21.9468	-21.1503	-1379.71		-565.406	35.0185	55.6572	2.95523	0	-0.110087	0	0	-32.7301
65	Complex_2	-20.381	-9.3643	1.69119	-3.07174	-5.31675	0	0	11.9901		-16.3096	1.35958	-2.09682	1.69119	0	0	0	0	0.0411604		1.72405	36.4739	52.4757	5.6927	0	-0.13	0	0	-31.4708		9.90634	-6988.5	-8302.57	4046.48	-129.292	-564.93	-23.3343	-19.1499	-1396.01		-599.696	36.4739	52.4757	5.6927	0	-0.13	0	0	-31.4708
66	Complex_2	-16.486	-12.304	-0.0559032	-4.06345	-6.02341	0	0	21.0812		-15.1204	1.37326	0.46103	-0.0559032	0	-0.00316301	0	0	-0.107521		1.07881	36.5373	57.4636	3.43049	0	-0.110528	0	0	-33.3335		9.08721	-6879.65	-8273.26	4098.2	-128.147	-560.108	-21.9926	-24.365	-1379.19		-590.794	36.5373	57.4636	3.43049	0	-0.110528	0	0	-33.3335
67	Complex_2	-22.3344	-9.81129	0.171816	-4.82325	-6.00623	0	0	17.2405		-19.106	1.04757	0.335114	0.171816	0	-0.00410199	0	0	-0.31674		0.861479	36.5364	57.4883	3.41433	0	-0.110512	0	0	-33.3383		9.08254	-6920.24	-8231.39	4083.99	-129.168	-558.977	-25.0227	-19.8832	-1402.1		-637.691	36.5364	57.4883	3.41433	0	-0.110512	0	0	-33.3383
68	Complex_2	-23.0386	-14.254	3.01141	-4.41738	-6.08679	0	0	17.4482		-18.74	2.90606	-0.945813	3.01141	0	-0.0107096	0	0	0.365199		0.485977	36.0264	55.4095	3.39581	0	-0.110512	0	0	-31.8883		9.21988	-6961.79	-8262.86	4055.58	-126.325	-557.654	-26.006	-16.4976	-1376.8		-651.231	36.0264	55.4095	3.39581	0	-0.110512	0	0	-31.8883
69	Complex_2	-19.405	-12.6562	0.210648	-4.51287	-5.20507	0	0	21.2113		-18.4529	1.31034	1.20927	0.210648	0	-0.00148755	0	0	-0.654959		0.546872	36.6497	57.5035	3.41366	0	-0.110449	0	0	-33.2221		9.06505	-6941.58	-8284.84	4085.47	-126.667	-564.722	-25.1354	-20.4387	-1357.76		-647.499	36.6497	57.5035	3.41366	0	-0.110449	0	0	-33.2221
70	Complex_2	-19.846	-9.48843	0.679431	-3.91244	-6.30626	0	0	19.3497		-20.1679	2.31168	2.41511	0.679431	0	-0.00120076	0	0	-0.299162		-0.482499	36.0149	55.4272	3.39175	0	-0.110485	0	0	-31.9056		9.21198	-6896.26	-8375.59	4071.56	-128.782	-552.188	-23.3748	-16.6663	-1334.13		-537.097	36.0149	55.4272	3.39175	0	-0.110485	0	0	-31.9056
71	Complex_2	-19.6668	-5.46105	0.267416	-3.49091	-6.41266	0	0	15.5709		-20.1405	1.31751	1.43014	0.267416	0	0.00135791	0	0	-1.15765		0.776235	36.1129	55.4093	3.41336	0	-0.110551	0	0	-31.8031		9.20389	-7029.64	-8292.42	3986.32	-125.923	-567.427	-25.4556	-15.0573	-1363.26		-626.411	36.1129	55.4093	3.41336	0	-0.110551	0	0	-31.8031
72	Complex_2	-16.9012	-5.44304	1.25187	-3.32647	-5.6406	0	0	16.8375		-20.5805	1.85717	0.326571	1.25187	0	0	0	0	-0.679076		0.957808	37.3736	50.7256	6.23149	0	-0.13	0	0	-30.2852		10.8317	-6929.68	-8220.81	4067.05	-125.118	-557.006	-26.7519	-15.4368	-1401.66		-649.946	37.3736	50.7256	6.23149	0	-0.13	0	0	-30.2852
73	Complex_2	-18.0225	-10.3738	0.0916762	-3.50146	-4.95793	0	0	20.5866		-19.8675	1.37077	0.823281	0.0916762	0	0.000241615	0	0	-0.0709516		0.52652	35.8283	55.4403	3.38616	0	-0.110477	0	0	-32.0905		9.2028	-6950.13	-8254.64	4055.19	-129.757	-560.665	-19.3291	-15.9803	-1390.59		-634.358	35.8283	55.4403	3.38616	0	-0.110477	0	0	-32.0905
74	Complex_2	-20.1641	-8.53323	0.85373	-3.54299	-5.29777	0	0	16.2996		-19.9434	-0.184153	-0.894369	0.85373	0	-0.00237575	0	0	-0.671677		0.530539	35.9233	55.4387	3.39182	0	-0.110496	0	0	-31.9941		9.19744	-6868.99	-8282.22	4100.14	-131.229	-557.142	-21.1728	-19.0656	-1365.7		-592.602	35.9233	55.4387	3.39182	0	-0.110496	0	0	-31.9941
75	Complex_2	-15.9275	-3.92446	3.70667	-4.8373	-6.19031	0	0	12.2514		-16.9335	4.50899	2.25369	3.70667	0	-0.00736305	0	0	-1.19675		-0.24725	36.5976	57.4614	3.42815	0	-0.110561	0	0	-33.2648		9.08337	-6940.94	-8265.24	4020.69	-132.723	-562.885	-22.855	-16.4066	-1370.76		-590.758	36.5976	57.4614	3.42815	0	-0.110561	0	0	-33.2648
76	Complex_2	-16.796	-4.11191	2.41934	-4.28502	-6.11086	0	0	14.7752		-19.4828	4.04623	4.6762	2.41934	0	-0.00488071	0	0	-2.58921		-0.455225	35.9294	55.4348	3.39534	0	-0.110484	0	0	-31.9866		9.19627	-6870.37	-8277.06	4071.23	-130.49	-553.144	-24.5318	-27.3309	-1374.22		-554.823	35.9294	55.4348	3.39534	0	-0.110484	0	0	-31.9866
77	Complex_2	-17.8899	-9.97863	-0.257362	-4.69506	-4.6897	0	0	18.2928		-16.562	2.40863	2.46543	-0.257362	0	-0.00133668	0	0	-0.194648		0.39655	36.5431	57.4865	3.42109	0	-0.110486	0	0	-33.33		9.076	-6985.41	-8280.07	3997.62	-126.547	-554.23	-24.5378	-20.4044	-1359.05		-618.204	36.5431	57.4865	3.42109	0	-0.110486	0	0	-33.33
78	Complex_2	-19.3781	-5.92239	-0.327441	-4.41973	-5.23473	0	0	16.3144		-19.7882	1.36695	1.92103	-0.327441	0	0.00100101	0	0	-0.128569		-0.0990762	36.5459	57.4777	3.4207	0	-0.110557	0	0	-33.3306		9.0887	-6951.37	-8288.3	4060.85	-125.055	-555.69	-25.4968	-20.2398	-1359.57		-637.868	36.5459	57.4777	3.4207	0	-0.110557	0	0	-33.3306
79	Complex_2	-29.5777	-12.2554	1.90549	-4.17406	-6.15871	0	0	12.2722		-21.1672	1.40234	0.306867	1.90549	0	-0.00437176	0	0	-0.41688		-0.388768	36.0198	55.4366	3.3965	0	-0.110492	0	0	-31.8991		9.19622	-6984.98	-8268.56	4069.17	-122.356	-558.958	-24.7112	-17.6568	-1407.98		-653.924	36.0198	55.4366	3.3965	0	-0.110492	0	0	-31.8991
80	Complex_2	-17.2666	-10.2048	3.97946	-3.68279	-5.87792	0	0	15.7753		-17.2559	3.45425	-3.72906	3.97946	0	-0.0194843	0	0	0.593184		2.63015	35.9913	55.4323	3.39739	0	-0.110516	0	0	-31.9239		9.196	-6892.35	-8270.89	4094.62	-126.874	-557.767	-24.2489	-15.083	-1416.1		-576.009	35.9913	55.4323	3.39739	0	-0.110516	0	0	-31.9239
81	Complex_2	-18.4647	-13.5094	1.53533	-3.96514	-5.96637	0	0	22.9494		-19.5085	2.15182	1.57788	1.53533	0	-0.00151084	0	0	-0.639694		-0.32019	36.5631	57.5329	3.40776	0	-0.110408	0	0	-33.3262		9.05903	-6932.52	-8278.94	4013.92	-124.906	-555.953	-24.9738	-15.5781	-1380.48		-565.613	36.5631	57.5329	3.40776	0	-0.110408	0	0	-33.3262
[truncated: 3,922 more rows]
[truncated: 40 more columns]
